# Supplementary material for: LMO2 is essential to maintain the ability of progenitors to differentiate into T-cell lineage in mice
Source: eLife journal article supplement (doi:10.7554/elife.68227), 2021-08-12

IB: anti-Tubulin $\alpha$       IB: anti-Lmo2  
sgCont sgLmo2      sgCont sgLmo2

100 kDa  
70 kDa  
50 kDa  
37 kDa  
25 kDa  
20 kDa

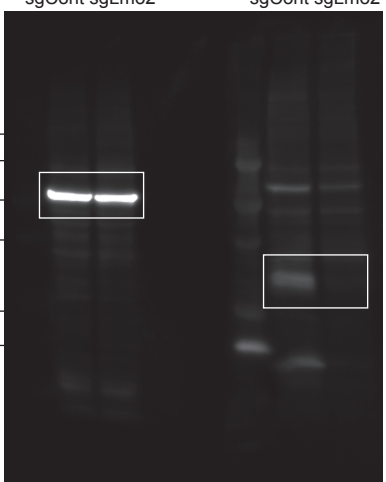

Supplement: fig2-figsupp1-data1 [file elife-68227-fig2-figsupp1-data1-v1.pdf]
