# Supplementary material for: LMO2 is essential to maintain the ability of progenitors to differentiate into T-cell lineage in mice
Source: eLife. 2021 Aug 12;10:e68227. doi: 10.7554/eLife.68227 (PMC8360648; doi:10.7554/eLife.68227)
Supplement: Figure 1—source data 1. [file elife-68227-fig1-data1.xlsx]

## Sheet: Sheet7
Fig.1-source data 1. Numbers of CD25+ pro-B(-) and pro-B(+) cells after Notch stimulation
Numbers of CD45+CD25+ cells (fold expansion, /input)
	ProB(-)/OP9 Mock	ProB(-)/OP9 Dll4	ProB(+)/OP9 Mock	ProB(+)/OP9 Dll4
Rep1	0.00184264	0.202986	0.0571188	36.2606
Rep2	0.0016395	0.199378	0.066319	46.3796
Rep3	0.00200085	0.127521	0.0731956	40.4376
AVE	0.00182766	0.176628	0.0655445	41.0259
STD	0.000181141	0.0425666	0.00806638	5.0851
TTEST				0.000154747
