# Supplementary material for: LMO2 is essential to maintain the ability of progenitors to differentiate into T-cell lineage in mice
Source: eLife. 2021 Aug 12;10:e68227. doi: 10.7554/eLife.68227 (PMC8360648; doi:10.7554/eLife.68227)
Supplement: Figure 1—source data 2. [file elife-68227-fig1-data2.xlsx]

## Sheet: Sheet1
	Fig.1-source data 2. Real-time RT-PCR detection of Mesi1, Hmga2, Bcl11a, or Lmo2 transcripts in pro-B(-) and pro-B(+) cells.
			Meis1	Hmga2	Bcl11a	Lmo2	(2^-dCt (Actb))*
	Pro-B(-)		4.82848e-06	9.2512e-05	0.000160627	0.00143673
			6.34477e-06	0.000190622	0.000133673	0.0013433
			3.96568e-06	0.000262936	0.000204445	0.00133866
		Average	5.04631e-06	0.000182023	0.000166248	0.00137289
		SD	1.20441e-06	8.55368e-05	3.57191e-05	5.53281e-05
	Pro-B(+)		0.00228752	0.0172651	0.00523353	0.00451205
			0.00197217	0.0180482	0.00492726	0.00435232
			0.00203325	0.0156684	0.00508689	0.00426275
		Average	0.00209765	0.0169939	0.00508256	0.00437571
		SD	0.000167248	0.00121287	0.000153183	0.000126287
	*All values are normalized to the expression of Actb.
