# Supplementary material for: LMO2 is essential to maintain the ability of progenitors to differentiate into T-cell lineage in mice
Source: eLife. 2021 Aug 12;10:e68227. doi: 10.7554/eLife.68227 (PMC8360648; doi:10.7554/eLife.68227)
Supplement: Figure 1—source data 3. [file elife-68227-fig1-data3.xlsx]

## Sheet: Sheet7
Fig.1-source data 3. Expression levels of Lmo2 protein in pro-B(-) and pro-B(+) cells
MFI of Lmo2
	ProB(-)	ProB(+)
Rep1	8116.3	13410
Rep2	8491.4	11979
Rep3	8974	13933
AVE	8527.23	13107.3
STD	429.971	1011.55
TTEST		0.00195429
