# Supplementary material for: LMO2 is essential to maintain the ability of progenitors to differentiate into T-cell lineage in mice
Source: eLife. 2021 Aug 12;10:e68227. doi: 10.7554/eLife.68227 (PMC8360648; doi:10.7554/eLife.68227)
Supplement: Figure 1—source data 4. [file elife-68227-fig1-data4.xlsx]

## Sheet: Sheet7
Fig.1-source data 4. Numbers of CD25+ cells in Lmo2-introduced pro-B(-) cells
	Numbers of CD45+CD25+ cells (fold expansion, /input)
		ProB(-)/Mock	ProB(-)/LMO2
	Rep1	0.0499846	1.73684
	Rep2	0.0413972	1.60196
	Rep3	0.0493114	2.84965
	Rep4	0.0550803	4.71096
	Rep5	0.0521789	3.71213
	Rep6	0.0834611	5.23546
	AVE	0.0635735	4.55285
	STD	0.0172842	0.773873
	TTEST		0.000363921
