# Supplementary material for: LMO2 is essential to maintain the ability of progenitors to differentiate into T-cell lineage in mice
Source: eLife. 2021 Aug 12;10:e68227. doi: 10.7554/eLife.68227 (PMC8360648; doi:10.7554/eLife.68227)
Supplement: Figure 2—figure supplement 1—source data 2. [file elife-68227-fig2-figsupp1-data2.xlsx]

## Sheet: Sheet1
Fig.2-source data 3. Percentages of CD25+ cells in Lmo2-deficient BM-derived progenitor cells
	% of CD25+ cells
		sgCont	sgLmo2
	Rep1	74.5	78.7
	Rep2	70.1	79.9
	Rep3	73.7	79.5
	AVE	72.7667	79.3667
	STD	2.34379	0.61101
