# Supplementary material for: LMO2 is essential to maintain the ability of progenitors to differentiate into T-cell lineage in mice
Source: eLife. 2021 Aug 12;10:e68227. doi: 10.7554/eLife.68227 (PMC8360648; doi:10.7554/eLife.68227)
Supplement: Figure 2—source data 1. [file elife-68227-fig2-data1.xlsx]

## Sheet: Sheet1
Fig.2-source data 2. Percentages and numbers of CD25+ cells in Lmo2-deficient pro-B(+) cells
	% of CD25+ cells
		sgCont d5	sgLmo2 d5	sgCont d10	sgLmo2 d10
	Rep1	36.1	39.6	38.1	4.53
	Rep2	26.8	38.3	41.2	8
	Rep3	32.3	33.3	42.2	6.25
	AVE	31.7333	37.0667	40.5	6.26
	STD	4.67582	3.32616	2.13776	1.73502
	Ttest		0.182717		2.74746e-05
	# of CD25+ cells (x 103)
		sgCont d5	sgLmo2 d5	sgCont d10	sgLmo2 d10
	Rep1	1.428	1.876	2.29	0.11
	Rep2	2.208	1.902	2.32	0.23
	Rep3	1.758	1.938	2.31	0.13
	AVE	1.798	1.90533	2.30667	0.156667
	STD	0.391535	0.0311341	0.0152753	0.064291
	Ttest		0.660659		5.93668e-07
