# Supplementary material for: LMO2 is essential to maintain the ability of progenitors to differentiate into T-cell lineage in mice
Source: eLife. 2021 Aug 12;10:e68227. doi: 10.7554/eLife.68227 (PMC8360648; doi:10.7554/eLife.68227)
Supplement: Figure 3—figure supplement 1—source data 1. [file elife-68227-fig3-figsupp1-data1.xlsx]

## Sheet: Sheet1
	Fig.3-source data 4. Ratio of AnnexinV+7-AAD+ cells in pro-B cells co-cultured with OP9-Mock and OP9-Dll4
		Pro-B(+)	Pro-B(-)/Mock	Pro-B(-)/Bcl2
		2.08	4.41	5
		2.03	6.4	7.25
		2.43	6.83	3.41
	Average	2.18	5.88	5.22
	SD	0.217945	1.29108	1.92943
