# Supplementary material for: LMO2 is essential to maintain the ability of progenitors to differentiate into T-cell lineage in mice
Source: eLife. 2021 Aug 12;10:e68227. doi: 10.7554/eLife.68227 (PMC8360648; doi:10.7554/eLife.68227)
Supplement: Figure 3—source data 1. [file elife-68227-fig3-data1.xlsx]

## Sheet: Sheet1
	Fig.3-source data 1. Real-time RT-PCR detection of Meis1, Hmga2, and Bcl11a transcripts in Lmo2- , Meis1-transfected pro-B(-) cells, parent pro-B(-), and pro-B(+) cells.
			Meis1	Hmga2	Bcl11a	(2^-dCt (Actb))*
	Pro-B(-)		1.29832e-05	1.67788e-05	0.000124722
			1.85262e-06	8.19441e-05	0.000182857
			3.57407e-06	6.02784e-05	0.000168847
		Average	6.13661e-06	5.30004e-05	0.000158808
		SD	5.99142e-06	3.31867e-05	3.03396e-05
	Pro-B(-)/Lmo2		6.50992e-05	0.000459388	0.00986134
			4.34586e-05	0.000746795	0.00410614
			3.09221e-05	0.00078338	0.00898043
		Average	4.64933e-05	0.000663188	0.00764931
		SD	1.72895e-05	0.000177441	0.00309992
	Pro-B(-)/Meis1		0.0116866	0.000594927	1.03214e-05
			0.00749945	0.000266791	8.49473e-06
			0.0134244	0.000541031	9.29573e-06
		Average	0.0108701	0.000467583	9.37063e-06
		SD	0.00304568	0.000175966	9.1564e-07
	Pro-B(+)		0.00100124	0.015051	0.00372124
			0.00165036	0.0150928	0.00515433
			0.00174084	0.0151242	0.00610836
		Average	0.00146415	0.0150893	0.00499464
		SD	0.000403436	3.67248e-05	0.00120154
	*All values are normalized to the expression of Actb.
