# Supplementary material for: LMO2 is essential to maintain the ability of progenitors to differentiate into T-cell lineage in mice
Source: eLife. 2021 Aug 12;10:e68227. doi: 10.7554/eLife.68227 (PMC8360648; doi:10.7554/eLife.68227)
Supplement: Figure 3—source data 2. [file elife-68227-fig3-data2.xlsx]

## Sheet: Sheet1
	Fig.3-source data 2. Overexpression of Bcl2 improves cell survival of pro-B(-) cells.*
			Pro-B(+)	Pro-B(-)	Pro-B(-)/hBcl2
	OP9-Dll4		27.7**	65.3	15.9
			35	78.1	20.3
			50	75.1	10
	OP9-Mock		13.3	14.8	3.18
			17.2	12.2	2.81
			20.6	11	2.93
	Cell death index***		14.4	50.5	12.72
			17.8	65.9	17.49
			29.4	64.1	7.07
		Average	20.5333	60.1667	12.4267
		SD	7.86469	8.41982	5.21619
		P value (Pro-B(+) vs. Pro-B(-))#			0.00398344
		P value (Pro-B(-) vs. Pro-B(-)/hBcl2)			0.00112537
		P value (Pro-B(+) vs. Pro-B(-)/hBcl2)			0.21101
	*Pro-B(+) cells and empty vector- or human BCL2-transduced pro-B(-) cells were cultured on OP9-Mock or OP9-Dll4 for 2 days.
	After culturing, the dead cells were detected by staining for Annexin V and 7-AAD in CD45+ and hNGFR+ (retrovirus-infected) cell populations.
	**This value indicates the percentage of Annexin+ 7-AAD+ fraction.
	***The cell death index is calculated as the difference in the percentage of dead cells in pro-B cells after co-culturing with OP9-Mock and OP9-Dll4.
	#These data were obtained from three independent experiments. P values are calculated by using Student t-test.
