# Supplementary material for: LMO2 is essential to maintain the ability of progenitors to differentiate into T-cell lineage in mice
Source: eLife. 2021 Aug 12;10:e68227. doi: 10.7554/eLife.68227 (PMC8360648; doi:10.7554/eLife.68227)
Supplement: Figure 3—source data 3. [file elife-68227-fig3-data3.xlsx]

## Sheet: Sheet1
	Fig.3-source data 3. Bcl2 overexpression does not provide differentiation potential in pro-B(-) cells.*
		Pro-B(+)/hBcl2	Pro-B(-)/hBcl2	(% of CD25+ cells)**
		93.4	0.65
		93	0.62
		94	0.75
	Average	93.4667	0.673333
	SD	0.503322	0.0680686
	P value***	5.98329e-10
	*Pro-B(-) or pro-B(+) cells with human BCL2 (Pro-B(-)/Bcl2, Pro-B(+)/Bcl2) were cultured on OP9-Dll4 as shown in Fig. 1D.
	**After culturing, the percentage of CD25+ cells in the live cells was analyzed.
	***These data were obtained from three independent experiments. P values are calculated by using Student t-test.
