# Supplementary material for: LMO2 is essential to maintain the ability of progenitors to differentiate into T-cell lineage in mice
Source: eLife. 2021 Aug 12;10:e68227. doi: 10.7554/eLife.68227 (PMC8360648; doi:10.7554/eLife.68227)
Supplement: Figure 4—figure supplement 1—source data 1. [file elife-68227-fig4-figsupp1-data1.xlsx]

## Sheet: Sheet1
	Fig.4-source data 3. Expression levels of Tcf7 in Lmo2-deficient pro-B(+) cells
		Rep1	Rep2	Rep3	AVE	STD	TTEST
	sgCont d5	0.000205357	0.000245975	0.000211046	0.000220792	2.19931e-05
	sgLmo2 d5	0.000198632	0.000208724	0.000211046	0.000206134	6.59978e-06	0.330875
	sgCont d10	0.000187152	0.000227425	0.000173281	0.000195953	2.81248e-05
	sgLmo2 d10	3.84246e-05	3.04913e-05	3.96787e-05	3.61982e-05	4.98192e-06	0.000635405
