# Supplementary material for: LMO2 is essential to maintain the ability of progenitors to differentiate into T-cell lineage in mice
Source: eLife. 2021 Aug 12;10:e68227. doi: 10.7554/eLife.68227 (PMC8360648; doi:10.7554/eLife.68227)
Supplement: Figure 4—source data 1. [file elife-68227-fig4-data1.xlsx]

## Sheet: Sheet1
	Fig.4-source data 1. Real-time RT-PCR detection of Tcf7 and Gata3 transcripts in pro-B(-) and pro-B(+) cells with exogenous Bcl2, pro-B(-)/Bcl2, and pro-B(+)/Bcl2, at 0–5 days after the culture on OP9-Dll4.
	Cell	Relative expression (/Actb)*		d0	P value**	d1	P value	d2	P value	d3	P value	d5	P value
	Pro-B(-)/Bcl2	Tcf7		0.00254634		0.00248466		0.011931		0.0414248		0.193286
				0.00233533		0.00177966		0.00623047		0.0270671		0.0854839
				0.00277432		0.00227931		0.00984642		0.0376126		0.240234
			Average	0.002552		0.00218121		0.00933597		0.0353682		0.173001
			SD	0.000219549		0.000362595		0.00288436		0.00743732		0.0793444
		Gata3		0.253659		0.452454		0.631418		0.895339		0.978799
				0.236228		0.358286		0.401042		0.594817		0.803763
				0.349805		0.364076		0.514221		0.629129		0.819661
			Average	0.279897		0.391605		0.51556		0.706428		0.867408
			SD	0.0611665		0.052776		0.115194		0.164498		0.0967942
	Pro-B(+)/Bcl2	Tcf7		0.0663793		0.131287		0.440994		1.04244		2.77922
				0.0975881		0.672652		1.17333		3.16384		2.0748
				0.275256		0.838028		1.62577		2.13974		2.10156
			Average	0.146408	0.0914807	0.547322	0.0630214	1.08003	0.0361581	2.11534	0.0273858	2.31853	0.000798403
			SD	0.112672		0.369664		0.597872		1.06091		0.399197
		Gata3		0.217313		0.745127		0.948758		1.61892		2.19048
				0.280148		0.846225		1.35822		2.51695		1.70515
				0.373353		0.926224		1.76074		2.17855		2.22396
			Average	0.290271	0.865503	0.839192	0.00179294	1.35591	0.0260797	2.10481	0.00738323	2.03986	0.00267731
			SD	0.0785108		0.0907533		0.405994		0.453533		0.290352
	*The relative expression is normalized to the expression of Actb.
	**These data were obtained from three independent experiments. P values are calculated by using Student t-test (Pro-B(-)/Bcl2 vs. Pro-B(+)/Bcl2).
