# Supplementary material for: LMO2 is essential to maintain the ability of progenitors to differentiate into T-cell lineage in mice
Source: eLife. 2021 Aug 12;10:e68227. doi: 10.7554/eLife.68227 (PMC8360648; doi:10.7554/eLife.68227)
Supplement: Figure 4—source data 2. [file elife-68227-fig4-data2.xlsx]

## Sheet: Sheet1
	Fig.4-source data 2. Introduction of Tcf7 provides differentiation potential for T-cell lineage to pro-B (-)/Bcl2.*
	Stromal cells		Mock/OP9		Dll4/OP9
	Cell		Mock	Tcf7	Mock	Tcf7	(% of CD25+ cells)**
	Pro-B(-)/Bcl2		0	0	0.58	52.7
			0.23	0.19	0.69	56.4
			0.39	0.54	1.41	45.5
		Average	0.206667	0.243333	0.893333	51.5333
		SD	0.196044	0.273922	0.450814	5.54286
					P value (Mock vs. Tcf7 at Dll4/OP9)***			8.90468e-05
	*A lentiviral vector encoding Tcf7 was infected into pro-B(-)/Bcl2 cells, and the cells were cultured on OP9-Dll4 for 3 days.
	**After culturing, the percentage of CD25+ cells in the live cells was analyzed.
	***These data were obtained from three independent experiments. P values are calculated by using Student t-test.
