# Supplementary material for: LMO2 is essential to maintain the ability of progenitors to differentiate into T-cell lineage in mice
Source: eLife. 2021 Aug 12;10:e68227. doi: 10.7554/eLife.68227 (PMC8360648; doi:10.7554/eLife.68227)
Supplement: Figure 5—figure supplement 1—source data 1. [file elife-68227-fig5-figsupp1-data1.xlsx]

## Sheet: Sheet1
	Fig.5-source data 1. Levels of H3K4-3Me around the Tcf7 locus in Lmo2-deficient pro-B(+) cells
	Tcf7 TSS	Rep1	Rep2	Rep3	AVE	STD	TTEST
	sgCont d5	23.8611	19.2903	19.0885	20.7466	2.69912
	sgLmo2 d5	14.2918	13.5763	15.9595	14.6092	1.22288	0.0230149
	sgCont d10	23.0453	22.1418	20.9957	22.0609	1.02719
	sgLmo2 d10	6.97029	7.55827	8.25342	7.59399	0.64231	3.22791e-05
	Tcf7 -31kb	Rep1	Rep2	Rep3	AVE	STD	TTEST
	sgCont d5	1.93312	2.29965	2.33307	2.18862	0.221895
	sgLmo2 d5	2.19429	2.15196	2.16186	2.16937	0.0221434	0.888386
	sgCont d10	2.01786	2.44816	2.47203	2.31268	0.255607
	sgLmo2 d10	1.41644	1.94848	1.53756	1.63416	0.27886	0.0359843
	Tcf7 -35kb	Rep1	Rep2	Rep3	AVE	STD	TTEST
	sgCont d5	4.3589	5.15602	4.44338	4.65277	0.437873
	sgLmo2 d5	4.11956	3.70784	3.85557	3.89432	0.208576	0.0536198
	sgCont d10	4.46986	3.70495	4.24542	4.14008	0.393185
	sgLmo2 d10	3.76351	4.83544	4.55987	4.38627	0.55665	0.565432
	Igk 3' UTR	Rep1	Rep2	Rep3	AVE	STD	TTEST
	sgCont d5	0.0619763	0.0697221	0.0821272	0.0712752	0.0101648
	sgLmo2 d5	0.0911413	0.0864076	0.108719	0.0954227	0.0117558	0.0545871
	sgCont d10	0.0910118	0.0848561	0.08437	0.086746	0.00370235
	sgLmo2 d10	0.0883415	0.0743121	0.115893	0.0928489	0.0211538	0.648356
