# Supplementary material for: LMO2 is essential to maintain the ability of progenitors to differentiate into T-cell lineage in mice
Source: eLife. 2021 Aug 12;10:e68227. doi: 10.7554/eLife.68227 (PMC8360648; doi:10.7554/eLife.68227)
Supplement: Supplementary file 1. [file elife-68227-supp1.xlsx]

## Sheet: summary
	Supplementary file 1. Microarray analysis of pro-B(+) and pro-B(-) cells.
	Group	array data file name
	Pro-B(-) Rep1	SG13164306_252665511978_S001_GE1_1105_Oct12_1_1.txt
	Pro-B(+) Rep1	SG13164306_252665511978_S001_GE1_1105_Oct12_1_2.txt
	Pro-B(-) Rep2	SG13164306_252665511978_S001_GE1_1105_Oct12_1_3.txt
	Pro-B(+) Rep2	SG13164306_252665511978_S001_GE1_1105_Oct12_1_4.txt
	Number of probes	Fold change cut-off
			FC >=2	FC >=5	FC >=10
	Pro-B(-) vs Pro-B(+)	Total	3965	981	458
	(Pro-B(-)/Pro-B(+)）	Up	3078	856	415
		Down	887	125	43
	Number of genes	Fold change cut-off
			FC >=5	FC >=10
	Pro-B(-) vs Pro-B(+)	Total	792	387
	(Pro-B(-)/Pro-B(+)）

## Sheet: FC5
Fold change cut off<=5
981 probes (792 genes)			Fold change
			Pro-B(-)/Pro-B(+)		Normalized signal
ProbeName	GeneSymbol	Description	FC (abs) (Pro-B(-)/Pro-B(+))	Regulation (Pro-B(-)/Pro-B(+))	Pro-B(+) (normalized)	Pro-B(-) (normalized)	Chromosome Number_Avadis_	Chromosome Start Index_Avadis_	Chromosome Strand_Avadis_	ControlType	Cytoband	EntrezGeneID	GenbankAccession	GeneName	GenomicCoordinates	Go	RefSeqAccession	UniGeneID
A_51_P128876	Ifitm3	Mus musculus interferon induced transmembrane protein 3 (Ifitm3), mRNA [NM_025378]	43.5698	up	2.67449	-2.77077	chr7	148195591	-	FALSE	mm|7qF5	66141	NM_025378	interferon induced transmembrane protein 3	chr7:148195650-148195591	GO:0009607|GO:0008285|GO:0016020|GO:0005886|GO:0016023|GO:0016021	NM_025378	Mm.141021
A_55_P1960108	Gm3515	PREDICTED: Mus musculus predicted gene 3515, transcript variant 2 (Gm3515), partial miscRNA [XR_106549]	7.63236	down	-7.33637	-4.40424	chr10	91533822	-	FALSE	mm|10qC2	100041799	XR_106549	predicted gene 3515	chr10:91533881-91533822	GO:0008150|GO:0003674|GO:0005575	XR_106549
A_55_P2110513	Lmo7	Mus musculus LIM domain only 7 (Lmo7), mRNA [NM_201529]	13.0343	down	-7.1847	-3.48046	chr14	102333150	+	FALSE	mm|14qE2.3	380928	NM_201529	LIM domain only 7	chr14:102333150-102333209	GO:0016337|GO:0016324|GO:0005913|GO:0042805|GO:0008022|GO:0046872	NM_201529	Mm.218981
A_55_P2011341			11.7163	up	0.881304	-2.66914	chr13	113884029	-	FALSE	mm|13qD2.2				chr13:113884088-113884029
A_51_P108020	Zmynd15	Mus musculus zinc finger, MYND-type containing 15 (Zmynd15), mRNA [NM_001029929]	8.63352	up	-2.84192	-5.95187	chr11	70279625	+	FALSE	mm|11qB3	574428	NM_001029929	zinc finger, MYND-type containing 15	chr11:70279625-70279684	GO:0008150|GO:0003674|GO:0005575|GO:0046872	NM_001029929	Mm.472771
A_55_P1967191	Gm4632	Mus musculus, clone IMAGE:1263126, mRNA. [BC027670]	5.40979	down	-4.79933	-2.36376	chr14	79578700	-	FALSE	mm|14qD3	100043765	BC027670	predicted gene 4632	chr14:79578759-79578700	GO:0008150|GO:0003674|GO:0005575		Mm.435553
A_51_P111612	Arrdc4	Mus musculus arrestin domain containing 4 (Arrdc4), transcript variant 1, mRNA [NM_001042592]	6.73696	up	-4.62823	-7.38033	chr7	75881905	-	FALSE	mm|7qD1	66412	NM_001042592	arrestin domain containing 4	chr7:75881964-75881905	GO:0008150|GO:0003674|GO:0005575	NM_001042592	Mm.251199
A_51_P491667	Derl3	Mus musculus Der1-like domain family, member 3 (Derl3), mRNA [NM_024440]	9.73928	up	-3.27726	-6.56108	chr10	75358503	+	FALSE	mm|10qC1	70377	NM_024440	Der1-like domain family, member 3	chr10:75358503-75358562	GO:0016020|GO:0005783|GO:0030176|GO:0016021|GO:0030968	NM_024440	Mm.275878
A_51_P294555	Ifitm6	Mus musculus interferon induced transmembrane protein 6 (Ifitm6), mRNA [NM_001033632]	118.492	up	-0.43453	-7.32318	chr7	148201714	-	FALSE	mm|7qF5	213002	NM_001033632	interferon induced transmembrane protein 6	chr7:148201773-148201714	GO:0008150|GO:0003674|GO:0016021|GO:0005575	NM_001033632	Mm.276440
A_52_P682382	Scd1	Mus musculus stearoyl-Coenzyme A desaturase 1 (Scd1), mRNA [NM_009127]	55.959	up	-1.71309	-7.51939	chr19	44469387	-	FALSE	mm|19qC3	20249	NM_009127	stearoyl-Coenzyme A desaturase 1	chr19:44469446-44469387	GO:0006629|GO:0005792|GO:0008610|GO:0005506|GO:0050830|GO:0005783|GO:0004768|GO:0010873|GO:0050872|GO:0016020|GO:0050873|GO:0016491|GO:0006633|GO:0016021|GO:0034435|GO:0044130|GO:0016717|GO:0055114	NM_009127	Mm.267377
A_51_P403243	Ccdc116	Mus musculus coiled-coil domain containing 116 (Ccdc116), transcript variant 2, mRNA [NM_029779]	42.5232	up	-2.09391	-7.50408	chr16	17141144	-	FALSE	mm|16qA3	76872	NM_029779	coiled-coil domain containing 116	chr16:17141203-17141144	GO:0008150|GO:0003674|GO:0005575	NM_029779	Mm.475763
A_52_P552879	Efcab4a	Mus musculus EF-hand calcium binding domain 4A (Efcab4a), mRNA [NM_001025103]	8.83298	down	-3.90655	-0.763647	chr7	148652239	+	FALSE	mm|7qF5	213573	NM_001025103	EF-hand calcium binding domain 4A	chr7:148652239-148652298	GO:0003674|GO:0002115|GO:0005509|GO:0005575	NM_001025103	Mm.386851
A_52_P370935	Glcci1	Mus musculus glucocorticoid induced transcript 1 (Glcci1), transcript variant 1, mRNA [NM_133236]	6.28779	up	-3.32002	-5.97257	chr6	8543357	+	FALSE	mm|6qA1	170772	NM_133236	glucocorticoid induced transcript 1	chr6:8543357-8543416	GO:0005515|GO:0005737	NM_133236	Mm.210787
A_51_P291501	Ccno	Mus musculus cyclin O (Ccno), mRNA [NM_001081062]	26.4619	down	-4.09555	0.630296	chr13	113780810	+	FALSE	mm|13qD2.2	218630	NM_001081062	cyclin O	chr13:113780810-113780869	GO:0004844|GO:0007049|GO:0019901|GO:0006284|GO:0045008|GO:0051726|GO:0005654|GO:0005634|GO:0000079|GO:0051301	NM_001081062	Mm.25457
A_66_P108468	2610528A11Rik	Mus musculus RIKEN cDNA 2610528A11 gene (2610528A11Rik), mRNA [NM_001206684]	21.2573	up	-1.6113	-6.02119	chr14	37915367	-	FALSE	mm|14qB	70045	NM_001206684	RIKEN cDNA 2610528A11 gene	chr14:37915426-37915367	GO:0008150|GO:0003674|GO:0005575	NM_001206684	Mm.271619
A_51_P275123	Psd3	Mus musculus pleckstrin and Sec7 domain containing 3 (Psd3), transcript variant 2, mRNA [NM_177698]	6.19323	down	-0.57671	2.05398	chr8	70213109	-	FALSE	mm|8qB3.3	234353	NM_177698	pleckstrin and Sec7 domain containing 3	chr8:70213168-70213109	GO:0030054|GO:0005886|GO:0005624|GO:0045202|GO:0005085|GO:0005622|GO:0005086|GO:0005737|GO:0050790|GO:0016020|GO:0045211|GO:0032012|GO:0032011	NM_177698	Mm.32525
A_55_P2062627	2210411K11Rik	Mus musculus RIKEN cDNA 2210411K11 gene (2210411K11Rik), mRNA [NM_029384]	6.26127	up	-0.975993	-3.62245	chr7	4736392	-	FALSE	mm|7qA1	664968	NM_029384	RIKEN cDNA 2210411K11 gene	chr7:4736451-4736392	GO:0008150|GO:0003674|GO:0005575	NM_029384	Mm.292837
A_52_P184368	Ncam2	Mus musculus neural cell adhesion molecule 2 (Ncam2), transcript variant 2, mRNA [NM_010954]	6.55542	down	-7.0492	-4.33651	chr16	81597911	+	FALSE	mm|16qC3.3	17968	NM_010954	neural cell adhesion molecule 2	chr16:81597911-81597970	GO:0030424|GO:0016020|GO:0005886|GO:0031225|GO:0016021|GO:0007155	NM_010954	Mm.433941
A_55_P2046145	Gm10693	PREDICTED: Mus musculus predicted pseudogene 10693 (Gm10693), miscRNA [XR_032476]	12.3597	up	2.06345	-1.56413	chr7	3813568	-	FALSE	mm|7qA1	675749	XR_032476	predicted pseudogene 10693	chr7:3813627-3813568		XR_032476	Mm.441334
A_51_P213099	Ntng1	Mus musculus 0 day neonate eyeball cDNA, RIKEN full-length enriched library, clone:E130203P04 product:hypothetical protein, full insert sequence. [AK053689]	6.94247	up	-2.33078	-5.12622	chr3	109946348	-	FALSE	mm|3qF3	80883	AK053689	netrin G1	chr3:109946407-109946348	GO:0016020|GO:0005886|GO:0007275|GO:0031225|GO:0007409|GO:0046658|GO:0030154|GO:0007399		Mm.39262
A_51_P211260	Dscaml1	Mus musculus Down syndrome cell adhesion molecule-like 1 (Dscaml1), mRNA [NM_001081270]	5.97782	up	-4.88771	-7.46733	chr9	45561221	+	FALSE	mm|9qA5.2	114873	NM_001081270	Down syndrome cell adhesion molecule-like 1	chr9:45561221-45561280	GO:0016338|GO:0009986|GO:0005886|GO:0007420|GO:0048704|GO:0007156|GO:0042803	NM_001081270	Mm.325499
A_51_P510891	Afp	Mus musculus alpha fetoprotein (Afp), mRNA [NM_007423]	11.8795	up	-2.50113	-6.07152	chr5	90937781	+	FALSE	mm|5qE1	11576	NM_007423	alpha fetoprotein	chr5:90937781-90937840	GO:0019953|GO:0005737|GO:0004566|GO:0042448|GO:0006810|GO:0005576|GO:0001542|GO:0060395|GO:0005615|GO:0046872	NM_007423	Mm.358570
A_51_P378856	Pfkp	Mus musculus phosphofructokinase, platelet (Pfkp), mRNA [NM_019703]	5.87806	up	-0.838625	-3.39397	chr13	6581718	-	FALSE	mm|13qA1	56421	NM_019703	phosphofructokinase, platelet	chr13:6583872-6581718	GO:0070095|GO:0005625|GO:0003824|GO:0005524|GO:0046872|GO:0006096|GO:0005829|GO:0016310|GO:0005737|GO:0030388|GO:0000166|GO:0051289|GO:0016301|GO:0008152|GO:0046835|GO:0006002|GO:0016740|GO:0003872|GO:0005945	NM_019703	Mm.273874
A_51_P509679		PREDICTED: Mus musculus immunoglobulin heavy chain (J558 family) (Igh-VJ558), mRNA [XM_003085465]	16.391	up	-0.182125	-4.21695	chr12	114496985	-	FALSE	mm|12qF1		XM_003085465		chr12:114497044-114496985		XM_003085465	Mm.458003
A_55_P2004536	Klra4	Mus musculus killer cell lectin-like receptor, subfamily A, member 4 (Klra4), mRNA [NM_010649]	6.69751	up	-4.8506	-7.59422	chr6	129994035	-	FALSE	mm|6qF3	16635	NM_010649	killer cell lectin-like receptor, subfamily A, member 4	chr6:129994094-129994035	GO:0007165|GO:0016020|GO:0005488|GO:0005529|GO:0004872|GO:0016021|GO:0007155|GO:0009897	NM_010649	Mm.333431
A_51_P401987	Tmem37	Mus musculus transmembrane protein 37 (Tmem37), mRNA [NM_019432]	7.69986	up	-1.39984	-4.34467	chr1	121964110	-	FALSE	mm|1qE2.3	170706	NM_019432	transmembrane protein 37	chr1:121964169-121964110	GO:0005262|GO:0005244|GO:0016020|GO:0070588|GO:0006810|GO:0034765|GO:0006816|GO:0016021|GO:0005216|GO:0006811	NM_019432	Mm.24750
A_51_P120093	Snx10	Mus musculus sorting nexin 10 (Snx10), transcript variant 1, mRNA [NM_028035]	10.4368	up	0.547798	-2.83581	chr6	51540112	+	FALSE	mm|6qB3	71982	NM_028035	sorting nexin 10	chr6:51540112-51540171	GO:0005545|GO:0005737|GO:0007154|GO:0016020|GO:0031313|GO:0006810|GO:0007032|GO:0035091|GO:0015031|GO:0008289|GO:0005768	NM_028035	Mm.294166
A_51_P246653	Clec7a	Mus musculus C-type lectin domain family 7, member a (Clec7a), mRNA [NM_020008]	260.163	up	0.467972	-7.5553	chr6	129411739	-	FALSE	mm|6qF3	56644	NM_020008	C-type lectin domain family 7, member a	chr6:129411798-129411739	GO:0008037|GO:0005886|GO:0002238|GO:0001874|GO:0001872|GO:0001879|GO:0001878|GO:0046872|GO:0050766|GO:0002221|GO:0016337|GO:0006954|GO:0002752|GO:0004872|GO:0032760|GO:0005529|GO:0001846|GO:0006910|GO:0006911|GO:0016020|GO:0005488|GO:0045087|GO:0030247|GO:0016021|GO:0009897|GO:0008329	NM_020008	Mm.239516
A_55_P1988384	Slc7a3	Mus musculus solute carrier family 7 (cationic amino acid transporter, y+ system), member 3 (Slc7a3), mRNA [NM_007515]	6.67205	up	-4.14497	-6.8831	chrX	98274644	-	FALSE	mm|XqC3	11989	NM_007515	solute carrier family 7 (cationic amino acid transporter, y+ system), member 3	chrX:98274703-98274644	GO:0015326|GO:0032006|GO:0005886|GO:0006865|GO:0055085|GO:0003333|GO:0015822|GO:0034220|GO:0016020|GO:0015171|GO:0005887|GO:0015181|GO:0006810|GO:0016021|GO:0000064|GO:0015809|GO:0006812|GO:0015807|GO:0015819|GO:0015189	NM_007515	Mm.5140
A_51_P106799	Pparg	Mus musculus peroxisome proliferator activated receptor gamma (Pparg), transcript variant 2, mRNA [NM_011146]	7.91667	up	0.174772	-2.81012	chr6	115440213	+	FALSE	mm|6qE3	19016	NM_011146	peroxisome proliferator activated receptor gamma	chr6:115440213-115440272	GO:0051974|GO:0005515|GO:0030308|GO:0003700|GO:0050544|GO:0044212|GO:0045598|GO:0003707|GO:0001818|GO:0060336|GO:0042953|GO:0045444|GO:0004879|GO:0071285|GO:0019395|GO:0032869|GO:0010745|GO:0046321|GO:0000122|GO:0001890|GO:0002674|GO:0019216|GO:0055098|GO:0045165|GO:0050872|GO:0050873|GO:0045600|GO:0008270|GO:0045893|GO:0001012|GO:0015909|GO:0019899|GO:0045892|GO:0008285|GO:0033993|GO:0005634|GO:…	NM_011146	Mm.3020
A_52_P425092		predicted gene 10092 [Source:MGI Symbol;Acc:MGI:3642362] [ENSMUST00000077110]	29.9777	up	-2.6831	-7.58892	chr16	36136075	+	FALSE	mm|16qB3				chr16:36136075-36137745
A_51_P234956	Xcl1	Mus musculus chemokine (C motif) ligand 1 (Xcl1), mRNA [NM_008510]	34.1171	up	-1.82745	-6.91987	chr1	166862020	-	FALSE	mm|1qH2.2	16963	NM_008510	chemokine (C motif) ligand 1	chr1:166862079-166862020	GO:2000538|GO:0032733|GO:2000518|GO:0007267|GO:0071560|GO:2000412|GO:2000513|GO:0005615|GO:0043433|GO:0042803|GO:0071636|GO:0042104|GO:0006955|GO:0006935|GO:0071353|GO:0035744|GO:0035745|GO:0051281|GO:0032689|GO:0032703|GO:0035740|GO:0008009|GO:0051209|GO:0002426|GO:0010820|GO:0050727|GO:0005576|GO:0002725|GO:0042379|GO:0002726|GO:0009615|GO:0005125|GO:0071663|GO:0002690|GO:0002839|GO:0045089|GO:…	NM_008510	Mm.190
A_55_P2172852	Ptplad2	Mus musculus protein tyrosine phosphatase-like A domain containing 2 (Ptplad2), mRNA [NM_025760]	10.1302	up	-3.32672	-6.6673	chr4	88058836	-	FALSE	mm|4qC4	66775	NM_025760	protein tyrosine phosphatase-like A domain containing 2	chr4:88058895-88058836	GO:0008150|GO:0003674|GO:0008610|GO:0016020|GO:0005783|GO:0006633|GO:0016021|GO:0005575|GO:0016829	NM_025760	Mm.386788
A_52_P300376	Xist	Mus musculus inactive X specific transcripts (Xist), transcript variant 2, non-coding RNA [NR_001570]	332.676	down	-7.34965	1.02832	chrX	100662174	-	FALSE	mm|XqD	213742	NR_001570	inactive X specific transcripts	chrX:100662233-100662174	GO:0005694|GO:0009048	NR_001570	Mm.274770
A_51_P137336	Cdh1	Mus musculus cadherin 1 (Cdh1), mRNA [NM_009864]	16.0269	up	-3.45874	-7.46117	chr8	109193812	+	FALSE	mm|8qD3	12550	NM_009864	cadherin 1	chr8:109193812-109193871	GO:0005515|GO:0030054|GO:0008013|GO:0016342|GO:0042993|GO:2000008|GO:0016337|GO:0070830|GO:0051260|GO:0071285|GO:0022408|GO:0005794|GO:0009986|GO:0045295|GO:0019903|GO:0005509|GO:0019904|GO:0007416|GO:0001701|GO:0043281|GO:0033561|GO:0009898|GO:0045893|GO:0005925|GO:0019538|GO:0048471|GO:0042153|GO:0005886|GO:0060693|GO:0015629|GO:0032880|GO:0071681|GO:0016323|GO:0043296|GO:0005737|GO:0005913|GO:…	NM_009864	Mm.35605
A_55_P2115136	4632428N05Rik	Mus musculus RIKEN cDNA 4632428N05 gene (4632428N05Rik), transcript variant 1, mRNA [NM_028732]	5.78223	up	-0.963822	-3.49545	chr10	59831980	+	FALSE	mm|10qB4	74048	NM_028732	RIKEN cDNA 4632428N05 gene	chr10:59831980-59832039	GO:0008150|GO:0003674|GO:0016020|GO:0004872|GO:0016021|GO:0005575	NM_028732	Mm.273584
A_52_P619248	Prl2c5	Mus musculus prolactin family 2, subfamily c, member 5 (Prl2c5), mRNA [NM_181852]	6.18683	up	-2.36173	-4.99093	chr13	13282998	+	FALSE	mm|13qA1	107849	NM_181852	prolactin family 2, subfamily c, member 5	chr13:13282998-13283933	GO:0008150|GO:0003674|GO:0005179|GO:0005615	NM_181852	Mm.392548
A_55_P1995572	Meis1	Mus musculus Meis homeobox 1 (Meis1), transcript variant B, mRNA [NM_001193271]	53.789	up	1.39399	-4.35525	chr11	18780695	-	FALSE	mm|11qA3.1	17268	NM_001193271	Meis homeobox 1	chr11:18780754-18780695	GO:0030097|GO:0005515|GO:0005667|GO:0006355|GO:0003700|GO:0046982|GO:0006357|GO:0006366|GO:0003705|GO:0048514|GO:0060216|GO:0005634|GO:0007275|GO:0001525|GO:0003677|GO:0006351|GO:0043565|GO:0045665|GO:0002089	NM_001193271	Mm.356578
A_55_P1998943	Oas1a	Mus musculus 2'-5' oligoadenylate synthetase 1A (Oas1a), mRNA [NM_145211]	16.429	up	0.637115	-3.40106	chr5	121346735	-	FALSE	mm|5qF	246730	NM_145211	2'-5' oligoadenylate synthetase 1A	chr5:121346794-121346735	GO:0005515|GO:0003725|GO:0001730|GO:0008152|GO:0048525	NM_145211	Mm.14301
A_51_P385812	Il12b	Mus musculus interleukin 12b (Il12b), mRNA [NM_008352]	5.12254	up	-5.21741	-7.57427	chr11	44227121	+	FALSE	mm|11qB1.1	16160	NM_008352	interleukin 12b	chr11:44227121-44227180	GO:0005515|GO:0032693|GO:0032819|GO:0005615|GO:0042803|GO:0032816|GO:0051607|GO:0030101|GO:0044130|GO:0002323|GO:0032729|GO:0004896|GO:0032725|GO:0032760|GO:0046982|GO:0042164|GO:0050671|GO:0042832|GO:0005125|GO:0005126|GO:0045785|GO:0071346|GO:0002230|GO:0051142|GO:0070743|GO:0002862|GO:0032733|GO:0042523|GO:0032735|GO:0042520|GO:0042093|GO:0042104|GO:0005737|GO:0002827|GO:0042102|GO:0051135|GO:…	NM_008352	Mm.239707
A_51_P100852	Fam26f	Mus musculus family with sequence similarity 26, member F (Fam26f), mRNA [NM_175449]	19.5306	up	-3.3368	-7.62447	chr10	33846211	-	FALSE	mm|10qB1	215900	NM_175449	family with sequence similarity 26, member F	chr10:33846270-33846211	GO:0008150|GO:0003674|GO:0016020|GO:0016021|GO:0005575	NM_175449	Mm.34479
A_55_P2067505	Slc16a3	Mus musculus solute carrier family 16 (monocarboxylic acid transporters), member 3 (Slc16a3), mRNA [NM_030696]	17.1542	up	-0.798267	-4.89875	chr11	120820030	+	FALSE	mm|11qE2	80879	NM_030696	solute carrier family 16 (monocarboxylic acid transporters), member 3	chr11:120820030-120820089	GO:0031965|GO:0016020|GO:0005886|GO:0015711|GO:0006810|GO:0015355|GO:0016021|GO:0015629|GO:0055085|GO:0015293	NM_030696	Mm.28632
A_51_P172231	Gsdmd	Mus musculus gasdermin D (Gsdmd), mRNA [NM_026960]	5.24059	up	0.0901904	-2.29954	chr15	75697536	+	FALSE	mm|15qD3	69146	NM_026960	gasdermin D	chr15:75697536-75697595	GO:0003674|GO:0031668|GO:0005575	NM_026960	Mm.27385
A_51_P105380	2010005H15Rik	Mus musculus RIKEN cDNA 2010005H15 gene (2010005H15Rik), mRNA [NM_029733]	12.452	up	-2.453	-6.09131	chr16	36257452	+	FALSE	mm|16qB3	76770	NM_029733	RIKEN cDNA 2010005H15 gene	chr16:36257452-36257511	GO:0008150|GO:0003674|GO:0004869|GO:0010466|GO:0005575|GO:0030414	NM_029733	Mm.327617
A_55_P2032489			5.99216	up	-4.89537	-7.47845	chr6	129683058	-	FALSE	mm|6qF3				chr6:129683117-129683058
A_55_P2034067	Myom3	Mus musculus myomesin family, member 3 (Myom3), mRNA [NM_001085509]	5.89739	up	-4.06273	-6.62281	chr4	135371377	+	FALSE	mm|4qD3	242702	NM_001085509	myomesin family, member 3	chr4:135371377-135371436	GO:0008150|GO:0003674|GO:0005575	NM_001085509	Mm.318639
A_55_P2054445	Cd84	Mus musculus CD84 antigen (Cd84), mRNA [NM_013489]	26.8442	up	-2.85759	-7.60413	chr1	173816502	+	FALSE	mm|1qH3	12523	NM_013489	CD84 antigen	chr1:173816502-173818732	GO:0016020|GO:0005886|GO:0004872|GO:0016021|GO:0007155	NM_013489	Mm.259115
A_51_P115817	Ralgps2	Mus musculus Ral GEF with PH domain and SH3 binding motif 2 (Ralgps2), transcript variant 2, mRNA [NM_023884]	10.4154	up	-4.46177	-7.84242	chr1	158739104	-	FALSE	mm|1qH1	78255	NM_023884	Ral GEF with PH domain and SH3 binding motif 2	chr1:158739163-158739104	GO:0005622|GO:0005085|GO:0008150|GO:0003674|GO:0005737|GO:0016020|GO:0005886|GO:0007264|GO:0005575	NM_023884	Mm.28376
A_51_P112734	Slc7a8	Mus musculus solute carrier family 7 (cationic amino acid transporter, y+ system), member 8 (Slc7a8), mRNA [NM_016972]	12.0108	up	-3.73837	-7.32463	chr14	55341137	-	FALSE	mm|14qC3	50934	NM_016972	solute carrier family 7 (cationic amino acid transporter, y+ system), member 8	chr14:55341196-55341137	GO:0019534|GO:0005886|GO:0015695|GO:0006865|GO:0005275|GO:0055085|GO:0003333|GO:0015101|GO:0005737|GO:0015171|GO:0016020|GO:0006810|GO:0016021|GO:0015179|GO:0015807	NM_016972	Mm.276831
A_51_P273538	Syce2	Mus musculus synaptonemal complex central element protein 2 (Syce2), transcript variant 2, mRNA [NM_027954]	16.7205	up	2.7289	-1.33464	chr8	87411133	+	FALSE	mm|8qC3	71846	NM_027954	synaptonemal complex central element protein 2	chr8:87411133-87411192	GO:0005515|GO:0007128|GO:0007049|GO:0007126|GO:0000795|GO:0005694|GO:0005634|GO:0000801|GO:0007130|GO:0051301	NM_027954	Mm.229128
A_55_P2134967	Uty	Mus musculus ubiquitously transcribed tetratricopeptide repeat gene, Y chromosome (Uty), mRNA [NM_009484]	23.3646	up	-2.97374	-7.51999	chrY	511172	-	FALSE	mm|YqA1	22290	NM_009484	ubiquitously transcribed tetratricopeptide repeat gene, Y chromosome	chrY:511231-511172		NM_009484	Mm.20477
A_55_P1997696	Plbd1	Mus musculus phospholipase B domain containing 1 (Plbd1), mRNA [NM_025806]	56.341	up	-1.06494	-6.88105	chr6	136560619	-	FALSE	mm|6qG1	66857	NM_025806	phospholipase B domain containing 1	chr6:136560678-136560619	GO:0016042|GO:0008150|GO:0003674|GO:0016787|GO:0005576|GO:0005575	NM_025806	Mm.3311
A_51_P102911	Hoxa11	Mus musculus homeobox A11 (Hoxa11), mRNA [NM_010450]	15.4498	down	-2.57683	1.37268	chr6	52192107	-	FALSE	mm|6qB3	15396	NM_010450	homeobox A11	chr6:52192166-52192107	GO:0005515|GO:0001656|GO:0001658|GO:0003700|GO:0005634|GO:0009954|GO:0001759|GO:0009953|GO:0030326|GO:0009952|GO:0048589|GO:0032993|GO:0060351|GO:0032332|GO:0005667|GO:0006355|GO:0010720|GO:0007275|GO:0003677|GO:0006351|GO:0043565|GO:0043234|GO:0007501|GO:0001501|GO:0042733	NM_010450	Mm.26954
A_55_P2040485	Ms4a4a	PREDICTED: Mus musculus membrane-spanning 4-domains, subfamily A, member 4A (Ms4a4a), mRNA [XM_003086124]	23.2986	up	-2.69573	-7.2379	chr19	11467221	+	FALSE	mm|19qA	666907	XM_003086124	membrane-spanning 4-domains, subfamily A, member 4A	chr19:11467221-11467280	GO:0008150|GO:0003674|GO:0005575	XM_003086124	Mm.391204
A_52_P576720	Calm4	Mus musculus calmodulin 4 (Calm4), mRNA [NM_020036]	5.3086	up	-2.56795	-4.97628	chr13	3837682	+	FALSE	mm|13qA1	80796	NM_020036	calmodulin 4	chr13:3837682-3837741	GO:0005509|GO:0005625|GO:0005626	NM_020036	Mm.21075
A_51_P279552	Cav2	Mus musculus caveolin 2 (Cav2), mRNA [NM_016900]	11.5949	up	-3.15474	-6.69015	chr6	17238393	+	FALSE	mm|6qA2	12390	NM_016900	caveolin 2	chr6:17238393-17238452	GO:0051219|GO:0030133|GO:0048471|GO:0008285|GO:0005886|GO:0007268|GO:0005634|GO:0051259|GO:0006906|GO:0042803|GO:0070836|GO:0005829|GO:0005622|GO:0016050|GO:0005737|GO:0031748|GO:0000149|GO:0060161|GO:0002080|GO:0048278|GO:0005811|GO:0019905|GO:0005794|GO:0009986|GO:0048741|GO:0005624|GO:0006897|GO:0031234|GO:0043234|GO:0016020|GO:0005887|GO:0001937|GO:0005901|GO:0045121|GO:0007005|GO:0007029	NM_016900	Mm.396075
A_51_P316553	Kdr	Mus musculus kinase insert domain protein receptor (Kdr), mRNA [NM_010612]	36.025	up	-2.6623	-7.83322	chr5	76329309	-	FALSE	mm|5qC3.3	16542	NM_010612	kinase insert domain protein receptor	chr5:76329368-76329309	GO:0008360|GO:0042221|GO:0046777|GO:0000166|GO:0016301|GO:0043025|GO:0043129|GO:0045446|GO:0043526|GO:0001945|GO:0050679|GO:0030335|GO:0048286|GO:0014068|GO:0010595|GO:0016310|GO:0005178|GO:0045165|GO:0009897|GO:0048170|GO:0043005|GO:0008284|GO:0032008|GO:0005886|GO:0030324|GO:0051894|GO:0007204|GO:0071944|GO:0055074|GO:0050927|GO:0050850|GO:0005737|GO:0001541|GO:0019838|GO:0045909|GO:0004872|GO:…	NM_010612	Mm.285
A_55_P2175400	Zfp467	Mus musculus zinc finger protein 467 (Zfp467), transcript variant 1, mRNA [NM_020589]	16.4802	up	-1.28958	-5.33224	chr6	48386636	-	FALSE	mm|6qB2.3	68910	NM_020589	zinc finger protein 467	chr6:48386695-48386636	GO:0005622|GO:0005515|GO:0006355|GO:0008270|GO:0005634|GO:0003676|GO:0003677|GO:0046872|GO:0006351	NM_020589	Mm.2464
A_51_P419759	Tha1	Mus musculus threonine aldolase 1 (Tha1), mRNA [NM_027919]	5.47147	up	-5.19653	-7.64846	chr11	117729653	-	FALSE	mm|11qE2	71776	NM_027919	threonine aldolase 1	chr11:117729712-117729653	GO:0008150|GO:0003674|GO:0005575	NM_027919	Mm.3200
A_55_P1974367	Fabp3	Mus musculus fatty acid binding protein 3, muscle and heart (Fabp3), mRNA [NM_010174]	6.03286	up	-1.65978	-4.25262	chr4	129992643	+	FALSE	mm|4qD2.2	14077	NM_010174	fatty acid binding protein 3, muscle and heart	chr4:129992643-129992702	GO:0005215|GO:0005504|GO:0005324|GO:0050543|GO:0005829|GO:0008289|GO:0005739|GO:0005737|GO:0016528|GO:0016529|GO:0005488|GO:0006810|GO:0015909|GO:0006656	NM_010174	Mm.388886
A_55_P2010152	Sell	Mus musculus selectin, lymphocyte (Sell), transcript variant 2, mRNA [NM_001164059]	51.669	up	-1.90217	-7.59339	chr1	166010740	+	FALSE	mm|1qH2.2	20343	NM_001164059	selectin, lymphocyte	chr1:166010740-166010799	GO:0005515|GO:0016020|GO:0005886|GO:0005488|GO:0005529|GO:0033198|GO:0016021|GO:0007155|GO:0002020|GO:0050839|GO:0009897	NM_001164059	Mm.1461
A_51_P282837	St14	Mus musculus suppression of tumorigenicity 14 (colon carcinoma) (St14), mRNA [NM_011176]	5.42859	up	-1.15558	-3.59616	chr9	30897249	-	FALSE	mm|9qA4	19143	NM_011176	suppression of tumorigenicity 14 (colon carcinoma)	chr9:30897308-30897249	GO:0004252|GO:0005576|GO:0003824|GO:0005615|GO:0016323|GO:0016787|GO:0016020|GO:0016477|GO:0005887|GO:0008152|GO:0006508|GO:0008236|GO:0008233|GO:0016021|GO:0019897	NM_011176	Mm.243926
A_51_P105124	P2ry6	Mus musculus pyrimidinergic receptor P2Y, G-protein coupled, 6 (P2ry6), mRNA [NM_183168]	70.9624	up	-0.225665	-6.37465	chr7	108086149	-	FALSE	mm|7qE3	233571	NM_183168	pyrimidinergic receptor P2Y, G-protein coupled, 6	chr7:108086208-108086149	GO:0030321|GO:0005886|GO:0004930|GO:0014911|GO:0007165|GO:0016323|GO:0045029|GO:0016324|GO:0019103|GO:0007186|GO:0016020|GO:0045028|GO:0004872|GO:0035589|GO:0004871|GO:0016021	NM_183168	Mm.235193
A_51_P419117	Rab15	Mus musculus RAB15, member RAS oncogene family (Rab15), mRNA [NM_134050]	8.67506	up	-4.52263	-7.6395	chr12	77898991	-	FALSE	mm|12qC3	104886	NM_134050	RAB15, member RAS oncogene family	chr12:77899050-77898991	GO:0005515|GO:0008150|GO:0000166|GO:0005575|GO:0005525	NM_134050	Mm.172847
A_55_P2032853	Entpd1	Mus musculus ectonucleoside triphosphate diphosphohydrolase 1 (Entpd1), mRNA [NM_009848]	9.56153	up	-4.35369	-7.61093	chr19	40816008	+	FALSE	mm|19qC3	12495	NM_009848	ectonucleoside triphosphate diphosphohydrolase 1	chr19:40816008-40816067	GO:0017111|GO:0017110|GO:0016787|GO:0016020|GO:0007186|GO:0006200|GO:0000166|GO:0009181|GO:0005605|GO:0030168|GO:0016021|GO:0005524	NM_009848	Mm.2824
A_52_P547662	P2ry1	Mus musculus purinergic receptor P2Y, G-protein coupled 1 (P2ry1), mRNA [NM_008772]	8.27105	up	-4.59702	-7.64509	chr3	60812600	+	FALSE	mm|3qD	18441	NM_008772	purinergic receptor P2Y, G-protein coupled 1	chr3:60812600-60812659	GO:0010469|GO:0005886|GO:0060406|GO:0007204|GO:0007193|GO:0030425|GO:0005739|GO:0016323|GO:0042312|GO:0043270|GO:0016324|GO:0046887|GO:0004872|GO:0004871|GO:0046982|GO:0004930|GO:0031686|GO:0010700|GO:0005524|GO:0044297|GO:0019233|GO:0009612|GO:0051100|GO:0007165|GO:0043531|GO:0007186|GO:0016020|GO:0045028|GO:0032962|GO:0042755|GO:0016021|GO:0035589	NM_008772	Mm.281452
A_52_P198435	Rasgrp3	Mus musculus RAS, guanyl releasing protein 3 (Rasgrp3), transcript variant 2, mRNA [NM_207246]	32.9687	up	-2.59568	-7.6387	chr17	75928310	+	FALSE	mm|17qE2	240168	NM_207246	RAS, guanyl releasing protein 3	chr17:75928310-75928369	GO:0048471|GO:0007265|GO:0032854|GO:0043087|GO:0046872|GO:0005085|GO:0005737|GO:0050790|GO:0046582|GO:0019900|GO:0017016|GO:0005088|GO:0032045	NM_207246	Mm.329203
A_55_P1965101	Xlr3b	Mus musculus X-linked lymphocyte-regulated 3B (Xlr3b), mRNA [NM_001081643]	16.5791	down	-2.10179	1.9495	chrX	70448087	+	FALSE	mm|XqA7.3	574437	NM_001081643	X-linked lymphocyte-regulated 3B	chrX:70448087-70448146	GO:0008150|GO:0003674|GO:0005575	NM_001081643	Mm.482923
A_55_P1955039	Myo1b	Mus musculus myosin IB (Myo1b), transcript variant 1, mRNA [NM_001161817]	6.4529	up	-4.96083	-7.65078	chr1	51807354	-	FALSE	mm|1qC1.1	17912	NM_001161817	myosin IB	chr1:51807413-51807354	GO:0005903|GO:0008150|GO:0003674|GO:0000166|GO:0016459|GO:0005524	NM_001161817	Mm.3390
A_55_P2046852	Gata1	Mus musculus GATA binding protein 1 (Gata1), mRNA [NM_008089]	6.04393	up	-3.1028	-5.69829	chrX	7536392	-	FALSE	mm|XqA1.1	14460	NM_008089	GATA binding protein 1	chrX:7536451-7536392	GO:0005515|GO:0003700|GO:0008285|GO:0006366|GO:0000981|GO:0031100|GO:0007267|GO:0050731|GO:0005634|GO:0097028|GO:0046872|GO:0002039|GO:0048821|GO:0045944|GO:0030099|GO:0048468|GO:0033690|GO:0030220|GO:0043066|GO:0031965|GO:0000976|GO:0006355|GO:0000977|GO:0010559|GO:0008301|GO:0005730|GO:0000122|GO:0030502|GO:0000978|GO:0003677|GO:0006351|GO:0070527|GO:0043565|GO:0001077|GO:0071222|GO:0003682|GO:…	NM_008089	Mm.335973
A_55_P2144556	Flrt3	Mus musculus fibronectin leucine rich transmembrane protein 3 (Flrt3), transcript variant 1, mRNA [NM_001172160]	14.005	up	-1.03177	-4.83963	chr2	140485061	-	FALSE	mm|2qF3	71436	NM_001172160	fibronectin leucine rich transmembrane protein 3	chr2:140485120-140485061	GO:0016021	NM_001172160	Mm.426781
A_55_P2017710	Igsf9	Mus musculus immunoglobulin superfamily, member 9 (Igsf9), transcript variant 1, mRNA [NM_033608]	13.4496	up	-2.64819	-6.39768	chr1	174428911	+	FALSE	mm|1qH3	93842	NM_033608	immunoglobulin superfamily, member 9	chr1:174428911-174428970	GO:0030054|GO:0016020|GO:0005886|GO:0045202|GO:0007275|GO:0016021|GO:0030425|GO:0030154|GO:0016358|GO:0007399	NM_033608	Mm.214530
A_55_P1978895	Skint3	Mus musculus selection and upkeep of intraepithelial T cells 3 (Skint3), transcript variant 2, mRNA [NM_177578]	6.56635	up	-4.83561	-7.55071	chr4	111973014	+	FALSE	mm|4qD1	195564	NM_177578	selection and upkeep of intraepithelial T cells 3	chr4:111973014-111973073	GO:0008150|GO:0003674|GO:0016020|GO:0016021|GO:0005575	NM_177578	Mm.259652
A_55_P2022773	Glcci1	Mus musculus glucocorticoid induced transcript 1 (Glcci1), transcript variant 1, mRNA [NM_133236]	5.18443	up	-5.29837	-7.67256	chr6	8547424	+	FALSE	mm|6qA1	170772	NM_133236	glucocorticoid induced transcript 1	chr6:8547424-8547483	GO:0005515|GO:0005737	NM_133236	Mm.210787
A_51_P214251	Rnls	Mus musculus renalase, FAD-dependent amine oxidase (Rnls), transcript variant 1, mRNA [NM_001167818]	5.45601	up	-4.0299	-6.47775	chr19	33212730	-	FALSE	mm|19qC1	67795	NM_001167818	renalase, FAD-dependent amine oxidase	chr19:33242836-33212730	GO:0008150|GO:0003674|GO:0016491|GO:0005576|GO:0005575|GO:0055114	NM_001167818	Mm.204591
A_51_P501364	Tbx21	Mus musculus T-box 21 (Tbx21), mRNA [NM_019507]	5.51483	up	-5.1666	-7.62991	chr11	96959417	-	FALSE	mm|11qD	57765	NM_019507	T-box 21	chr11:96959476-96959417	GO:0005515|GO:0006355|GO:0003700|GO:0044212|GO:0050776|GO:0043025|GO:0005634|GO:0072676|GO:0045893|GO:0048304|GO:0003677|GO:0006351	NM_019507	Mm.94519
A_55_P1993001		predicted gene, 16792 [Source:MGI Symbol;Acc:MGI:4439716] [ENSMUST00000103526]	9.59347	up	-1.04045	-4.3025	chr12	116446433	-	FALSE	mm|12qF2		AF303868		chr12:116446492-116446433			Mm.313460
A_55_P2112302			14.3749	up	1.56461	-2.28087	chr17	54080173	-	FALSE	mm|17qC				chr17:054080232-054080173
A_55_P2008895	Tmsb15b1	Mus musculus thymosin beta 15b1 (Tmsb15b1), mRNA [NM_001081983]	5.177	up	-4.82021	-7.19232	chrX	133511302	-	FALSE	mm|XqF1	666244	NM_001081983	thymosin beta 15b1	chrX:133511361-133511302	GO:0008150|GO:0003674|GO:0005575	NM_001081983	Mm.381904
A_52_P180373	Mpeg1	Mus musculus macrophage expressed gene 1 (Mpeg1), mRNA [NM_010821]	30.9053	up	-2.63752	-7.5873	chr19	12537697	+	FALSE	mm|19qA	17476	NM_010821	macrophage expressed gene 1	chr19:12537697-12537756	GO:0016020|GO:0016021	NM_010821	Mm.3999
A_51_P483617	0610040J01Rik	Mus musculus RIKEN cDNA 0610040J01 gene (0610040J01Rik), mRNA [NM_029554]	19.934	up	-3.22919	-7.54636	chr5	64290780	+	FALSE	mm|5qC3.1	76261	NM_029554	RIKEN cDNA 0610040J01 gene	chr5:64290780-64290839	GO:0008150|GO:0003674|GO:0005575	NM_029554	Mm.38143
A_52_P225570	Parva	Mus musculus parvin, alpha (Parva), mRNA [NM_020606]	5.65977	up	-5.16579	-7.66653	chr7	119734646	+	FALSE	mm|7qF1	57342	NM_020606	parvin, alpha	chr7:119734646-119734705	GO:0005515|GO:0030054|GO:0030036|GO:0005886|GO:0003779|GO:0005634|GO:0015629|GO:0051291|GO:0030027|GO:0005829|GO:0043234|GO:0005737|GO:0016020|GO:0060271|GO:0030030|GO:0005856|GO:0007155|GO:0005925	NM_020606	Mm.143763
A_51_P451428	Marveld2	Mus musculus MARVEL (membrane-associating) domain containing 2 (Marveld2), transcript variant 1, mRNA [NM_001038602]	7.67202	up	-3.57426	-6.51387	chr13	101366266	-	FALSE	mm|13qD1	218518	NM_001038602	MARVEL (membrane-associating) domain containing 2	chr13:101366325-101366266	GO:0008150|GO:0003674|GO:0030054|GO:0016020|GO:0005886|GO:0007605|GO:0016021|GO:0005923|GO:0005575	NM_001038602	Mm.25300
A_55_P2162910	Rtn1	Mus musculus reticulon 1 (Rtn1), transcript variant 1, mRNA [NM_153457]	26.1209	up	-2.91758	-7.62471	chr12	73313276	-	FALSE	mm|12qC3	104001	NM_153457	reticulon 1	chr12:73313335-73313276	GO:0008150|GO:0003674|GO:0016020|GO:0005783|GO:0016021	NM_153457	Mm.221275
A_51_P455647	Car2	Mus musculus carbonic anhydrase 2 (Car2), mRNA [NM_009801]	23.4084	up	-3.09919	-7.64815	chr3	14900206	+	FALSE	mm|3qA1	12349	NM_009801	carbonic anhydrase 2	chr3:14900206-14900265	GO:0030424|GO:0045672|GO:0045177|GO:0032849|GO:0004089|GO:0015670|GO:0005615|GO:0046903|GO:0046872|GO:0016829|GO:0005829|GO:0005902|GO:0016323|GO:0005737|GO:0045780|GO:0008270|GO:0002009|GO:0006730	NM_009801	Mm.1186
A_55_P2178678	P2rx5	Mus musculus purinergic receptor P2X, ligand-gated ion channel, 5 (P2rx5), mRNA [NM_033321]	29.4201	up	-1.92064	-6.79937	chr11	72986128	+	FALSE	mm|11qB4	94045	NM_033321	purinergic receptor P2X, ligand-gated ion channel, 5	chr11:72986128-72986187	GO:0035590|GO:0004931|GO:0005886|GO:0005525|GO:0005524|GO:0019228|GO:0034220|GO:0016020|GO:0005887|GO:0043416|GO:0008144|GO:0006810|GO:0001614|GO:0051260|GO:0008270|GO:0004872|GO:0016021|GO:0005216|GO:0006812|GO:0007166|GO:0006811	NM_033321	Mm.156893
A_51_P123625	Irg1	Mus musculus immunoresponsive gene 1 (Irg1), mRNA [NM_008392]	14.3603	up	-3.4321	-7.27611	chr14	103455171	+	FALSE	mm|14qE2.3	16365	NM_008392	immunoresponsive gene 1	chr14:103455171-103455231	GO:0019543|GO:0047547|GO:0032496	NM_008392	Mm.4662
A_55_P2037662	Atp1a3	Mus musculus ATPase, Na+/K+ transporting, alpha 3 polypeptide (Atp1a3), mRNA [NM_144921]	31.5244	up	-2.65219	-7.63058	chr7	25763192	-	FALSE	mm|7qA3	232975	NM_144921	ATPase, Na+/K+ transporting, alpha 3 polypeptide	chr7:25763251-25763192	GO:0030424|GO:0008344|GO:0005886|GO:0005783|GO:0015077|GO:0005634|GO:0003824|GO:0046872|GO:0015662|GO:0006754|GO:0005737|GO:0034220|GO:0000166|GO:0043209|GO:0006810|GO:0016820|GO:0007613|GO:0006814|GO:0006813|GO:0006812|GO:0006811|GO:0005391|GO:0005794|GO:0042493|GO:0005890|GO:0005524|GO:0015672|GO:0035235|GO:0016787|GO:0016020|GO:0008542|GO:0008152|GO:0016021	NM_144921	Mm.44101
A_55_P1998942	Oas1a	Mus musculus 2'-5' oligoadenylate synthetase 1A (Oas1a), mRNA [NM_145211]	25.7104	up	-1.59146	-6.27574	chr5	121348338	-	FALSE	mm|5qF	246730	NM_145211	2'-5' oligoadenylate synthetase 1A	chr5:121348397-121348338	GO:0005515|GO:0003725|GO:0001730|GO:0008152|GO:0048525	NM_145211	Mm.14301
A_51_P114634	Amz1	Mus musculus archaelysin family metallopeptidase 1 (Amz1), mRNA [NM_173405]	5.24127	up	-0.0305738	-2.42049	chr5	141229165	+	FALSE	mm|5qG2	231842	NM_173405	archaelysin family metallopeptidase 1	chr5:141229165-141229224	GO:0008150|GO:0003674|GO:0016787|GO:0008233|GO:0005575|GO:0046872|GO:0008237	NM_173405	Mm.397580
A_51_P102789	C1qc	Mus musculus complement component 1, q subcomponent, C chain (C1qc), mRNA [NM_007574]	17.3813	up	-3.62798	-7.74744	chr4	136445766	-	FALSE	mm|4qD3	12262	NM_007574	complement component 1, q subcomponent, C chain	chr4:136445825-136445766	GO:0005581|GO:0030853|GO:0005576|GO:0045650	NM_007574	Mm.439732
A_51_P192800	Grn	Mus musculus granulin (Grn), mRNA [NM_008175]	10.5975	up	2.07326	-1.33239	chr11	102297692	+	FALSE	mm|11qD	14824	NM_008175	granulin	chr11:102297692-102297751	GO:0050679|GO:0005739|GO:0007566|GO:0001835|GO:0005615	NM_008175	Mm.1568
A_66_P138308	Cndp2	Mus musculus CNDP dipeptidase 2 (metallopeptidase M20 family) (Cndp2), mRNA [NM_023149]	6.77981	down	-3.96701	-1.20576	chr18	84844437	-	FALSE	mm|18qE4	66054	NM_023149	CNDP dipeptidase 2 (metallopeptidase M20 family)	chr18:84844496-84844437	GO:0005737|GO:0016787|GO:0034701|GO:0008152|GO:0006508|GO:0004180|GO:0008233|GO:0016805|GO:0046872|GO:0008237|GO:0005829	NM_023149	Mm.29646
A_55_P2094060	Gzma	Mus musculus granzyme A (Gzma), mRNA [NM_010370]	10.5809	up	1.10796	-2.29544	chr13	113884035	-	FALSE	mm|13qD2.2	14938	NM_010370	granzyme A	chr13:113884094-113884035	GO:0043065|GO:0051354|GO:0004252|GO:0006915|GO:0005576|GO:0003824|GO:0042803|GO:0043392|GO:0006922|GO:0042802|GO:0016787|GO:0032078|GO:0051603|GO:0008152|GO:0019835|GO:0006508|GO:0008236|GO:0008233	NM_010370	Mm.15510
A_52_P375312	Amica1	Mus musculus adhesion molecule, interacts with CXADR antigen 1 (Amica1), mRNA [NM_001005421]	158.633	up	0.198161	-7.11138	chr9	44915486	+	FALSE	mm|9qA5.2	270152	NM_001005421	adhesion molecule, interacts with CXADR antigen 1	chr9:44915486-44915545	GO:0008150|GO:0003674|GO:0005886	NM_001005421	Mm.190461
A_51_P142421	Rspo1	Mus musculus R-spondin homolog (Xenopus laevis) (Rspo1), mRNA [NM_138683]	7.83647	up	-2.55748	-5.52768	chr4	124686270	+	FALSE	mm|4qD2.2	192199	NM_138683	R-spondin homolog (Xenopus laevis)	chr4:124686270-124686329	GO:0090263|GO:0005102|GO:0002090|GO:0005634|GO:0005576|GO:0016055|GO:0060070|GO:0008201|GO:0005615|GO:0050896	NM_138683	Mm.42202
A_52_P24308	Uchl1	Mus musculus ubiquitin carboxy-terminal hydrolase L1 (Uchl1), mRNA [NM_011670]	36.6945	up	-2.47957	-7.67706	chr5	67073886	+	FALSE	mm|5qC3.1	22223	NM_011670	ubiquitin carboxy-terminal hydrolase L1	chr5:67073886-67074977	GO:0043130|GO:0006511|GO:0030424|GO:0016579|GO:0005886|GO:0008283|GO:0016874|GO:0005634|GO:0007409|GO:0031694|GO:0043231|GO:0005829|GO:0050905|GO:0005622|GO:0007412|GO:0005737|GO:0043407|GO:0043025|GO:0007628|GO:0008242|GO:0006950|GO:0019233|GO:0004197|GO:0016787|GO:0008152|GO:0019896|GO:0008233|GO:0042755|GO:0004221|GO:0008234	NM_011670	Mm.29807
A_55_P2008437	Cdkn2a	Mus musculus cyclin-dependent kinase inhibitor 2A (Cdkn2a), transcript variant 1, mRNA [NM_009877]	15.997	down	-2.94086	1.05887	chr4	88920405	-	FALSE	mm|4qC4	12578	NM_009877	cyclin-dependent kinase inhibitor 2A	chr4:88920464-88920405	GO:0005515|GO:0010468|GO:0033088|GO:0014070|GO:0030308|GO:0003700|GO:0001652|GO:0006364|GO:0009303|GO:0071158|GO:0070534|GO:0008637|GO:0051444|GO:0055105|GO:0000209|GO:0019901|GO:0007569|GO:0010389|GO:0007568|GO:0010243|GO:0030889|GO:0045786|GO:0043234|GO:0007049|GO:0008544|GO:0000075|GO:0005654|GO:0045893|GO:0090398|GO:0001953|GO:0008134|GO:0048103|GO:0008285|GO:0045736|GO:0005634|GO:0000079|GO:…	NM_009877	Mm.4733
A_55_P2044128	LOC100040196	PREDICTED: Mus musculus y-linked testis-specific protein 1-like, transcript variant 2 (LOC100040196), mRNA [XM_001474092]	6.99259	up	-4.88719	-7.69302	chrY_random	17177949	+	FALSE		100040196	XM_001474092	y-linked testis-specific protein 1-like	chrY_random:17177949-17178008		XM_001474092
A_51_P108459	Gpr65	Mus musculus G-protein coupled receptor 65 (Gpr65), mRNA [NM_008152]	33.7458	up	-0.88443	-5.96107	chr12	99514727	+	FALSE	mm|12qE	14744	NM_008152	G-protein coupled receptor 65	chr12:99514727-99514786	GO:0005886|GO:0031532|GO:0004930|GO:0010447|GO:0030819|GO:0006915|GO:0032862|GO:0007165|GO:0007186|GO:0016020|GO:0051496|GO:0004872|GO:0004871|GO:0016021	NM_008152	Mm.378924
A_55_P2033041	Sirpb1b	Mus musculus signal-regulatory protein beta 1B (Sirpb1b), mRNA [NM_001173460]	13.1455	up	-3.97255	-7.68905	chr3	15495798	-	FALSE	mm|3qA1	668101	NM_001173460	signal-regulatory protein beta 1B	chr3:15495857-15495798	GO:0008150|GO:0003674|GO:0005575	NM_001173460	Mm.423523
A_51_P389885	Spic	Mus musculus Spi-C transcription factor (Spi-1/PU.1 related) (Spic), mRNA [NM_011461]	19.3241	up	-3.39832	-7.67065	chr10	88138053	-	FALSE	mm|10qC1	20728	NM_011461	Spi-C transcription factor (Spi-1/PU.1 related)	chr10:88138112-88138053	GO:0043565|GO:0006355|GO:0003700|GO:0045944|GO:0001824|GO:0005634|GO:0003677|GO:0006351	NM_011461	Mm.21642
A_55_P2083511	Fam179a	Mus musculus family with sequence similarity 179, member A (Fam179a), mRNA [NM_177087]	5.03557	up	-5.22784	-7.56	chr17	72064020	+	FALSE	mm|17qE1.3	320159	NM_177087	family with sequence similarity 179, member A	chr17:72064020-72064079	GO:0008150|GO:0003674|GO:0005488|GO:0005575	NM_177087	Mm.187372
A_55_P1989341	Ntng1	Mus musculus netrin G1 (Ntng1), transcript variant a, mRNA [NM_030699]	5.11574	up	-5.24808	-7.60302	chr3	109584107	-	FALSE	mm|3qF3	80883	NM_030699	netrin G1	chr3:109584166-109584107	GO:0016020|GO:0005886|GO:0007275|GO:0031225|GO:0007409|GO:0046658|GO:0030154|GO:0007399	NM_030699	Mm.39262
A_55_P1961127	H19	Mus musculus H19 fetal liver mRNA (H19), non-coding RNA [NR_001592]	20.7959	up	3.70576	-0.672461	chr7	149761492	-	FALSE	mm|7qF5	14955	NR_001592	H19 fetal liver mRNA	chr7:149761551-149761492	GO:0005737|GO:0008285|GO:0005844	NR_001592	Mm.14802
A_51_P390937		predicted gene, 16939 [Source:MGI Symbol;Acc:MGI:4439863] [ENSMUST00000103320]	9.78952	down	-3.41423	-0.122992	chr6	68206771	+	FALSE	mm|6qC1		M57280		chr6:68206771-68206830			Mm.333117
A_55_P1971094	Esx1	Mus musculus extraembryonic, spermatogenesis, homeobox 1 (Esx1), mRNA [NM_007957]	9.6396	down	-7.15466	-3.88569	chrX	133649965	-	FALSE	mm|XqF1	13984	NM_007957	extraembryonic, spermatogenesis, homeobox 1	chrX:133650024-133649965	GO:0003674|GO:0001568|GO:0060713|GO:0060716|GO:0005634|GO:0005575|GO:0003677	NM_007957	Mm.8017
A_55_P1976278	Prkcb	Mus musculus protein kinase C, beta (Prkcb), mRNA [NM_008855]	17.0612	up	-1.61569	-5.70834	chr7	129777841	+	FALSE	mm|7qF3	18751	NM_008855	protein kinase C, beta	chr7:129777841-129777900	GO:0050853|GO:0005515|GO:0034339|GO:0005886|GO:0005634|GO:0050681|GO:0031526|GO:0046872|GO:0014059|GO:0005829|GO:0035556|GO:0042393|GO:0005737|GO:0030374|GO:0000166|GO:0016301|GO:0005080|GO:0006816|GO:0043123|GO:0016772|GO:0005813|GO:0006355|GO:0035408|GO:0005246|GO:0042493|GO:0006874|GO:0005624|GO:0006915|GO:0005625|GO:0005626|GO:0005524|GO:0006351|GO:0035403|GO:0042113|GO:0016310|GO:0004672|GO:…	NM_008855	Mm.207496
A_51_P254855	Ptgs2	Mus musculus prostaglandin-endoperoxide synthase 2 (Ptgs2), mRNA [NM_011198]	33.8284	up	-2.78124	-7.8614	chr1	151954744	+	FALSE	mm|1qG1	19225	NM_011198	prostaglandin-endoperoxide synthase 2	chr1:151954744-151954803	GO:0042640|GO:0071636|GO:0031622|GO:0004601|GO:0001516|GO:0042127|GO:0032496|GO:0090050|GO:0007613|GO:0051926|GO:0090362|GO:0006979|GO:0005792|GO:0008610|GO:0007566|GO:0051968|GO:0043234|GO:0050873|GO:0032227|GO:0016491|GO:0005788|GO:0019899|GO:0020037|GO:0055114|GO:0043005|GO:0008285|GO:0005783|GO:0005634|GO:0030282|GO:0046872|GO:0008289|GO:0045429|GO:0046697|GO:0005737|GO:0006954|GO:0031915|GO:…	NM_011198	Mm.292547
A_55_P2066116	Bcl3	Mus musculus B-cell leukemia/lymphoma 3 (Bcl3), mRNA [NM_033601]	5.95317	up	0.431174	-2.14249	chr7	20393826	-	FALSE	mm|7qA3	12051	NM_033601	B-cell leukemia/lymphoma 3	chr7:20393885-20393826	GO:0005515|GO:0003700|GO:0007249|GO:0005634|GO:0042088|GO:0048536|GO:0005737|GO:0032996|GO:0030198|GO:0045944|GO:0002467|GO:0033257|GO:0042742|GO:0000060|GO:0032729|GO:0043066|GO:0006355|GO:0045415|GO:0030330|GO:0002268|GO:0042536|GO:0042832|GO:0045727|GO:0042981|GO:0009615|GO:0003677|GO:0006974|GO:0006351|GO:0043234|GO:0042771|GO:0010225|GO:0045064|GO:0019730|GO:0045893|GO:0045892|GO:0045082|GO:…	NM_033601	Mm.439658
A_51_P440047	1110067D22Rik	Mus musculus RIKEN cDNA 1110067D22 gene (1110067D22Rik), mRNA [NM_173752]	5.95908	up	-2.80497	-5.38005	chr11	20723825	-	FALSE	mm|11qA3.1	216551	NM_173752	RIKEN cDNA 1110067D22 gene	chr11:20723884-20723825	GO:0008150|GO:0003674|GO:0005529|GO:0005575	NM_173752	Mm.76694
A_55_P2020538			12.2021	up	-3.58168	-7.19074				FALSE
A_51_P286737	Ccl2	Mus musculus chemokine (C-C motif) ligand 2 (Ccl2), mRNA [NM_011333]	75.4566	up	0.22982	-6.00776	chr11	81850650	+	FALSE	mm|11qC	20296	NM_011333	chemokine (C-C motif) ligand 2	chr11:81850650-81850709	GO:0005515|GO:0009408|GO:0035684|GO:0019221|GO:0090265|GO:0005615|GO:0005737|GO:0006955|GO:0006954|GO:0006935|GO:0071356|GO:0031727|GO:0043025|GO:0007179|GO:0008201|GO:0048010|GO:0008009|GO:0019725|GO:0070098|GO:0001664|GO:0030593|GO:0006874|GO:0043277|GO:0006916|GO:0005576|GO:0001525|GO:0005125|GO:0043615|GO:0010574|GO:0002548|GO:0071222|GO:0071346|GO:0001938|GO:0050870|GO:0050806|GO:0071347|GO:…	NM_011333	Mm.290320
A_55_P2035018	Clec4n	Mus musculus C-type lectin domain family 4, member n (Clec4n), transcript variant 1, mRNA [NM_020001]	295.106	up	2.07969	-6.1254	chr6	123196969	+	FALSE	mm|6qF2	56620	NM_020001	C-type lectin domain family 4, member n	chr6:123196969-123197028	GO:0005515|GO:0016020|GO:0005488|GO:0045087|GO:0050832|GO:0005529|GO:0050715|GO:0016021|GO:0043123	NM_020001	Mm.271782
A_55_P2067895	Krba1	Mus musculus KRAB-A domain containing 1 (Krba1), mRNA [NM_133922]	13.6978	up	-1.0251	-4.80098	chr6	48366831	+	FALSE	mm|6qB2.3	77827	NM_133922	KRAB-A domain containing 1	chr6:48366831-48366890	GO:0008150|GO:0003674|GO:0005575	NM_133922	Mm.107646
A_52_P343306	H2-Aa	Mus musculus histocompatibility 2, class II antigen A, alpha (H2-Aa), mRNA [NM_010378]	178.197	up	0.328749	-7.14858	chr17	34421285	-	FALSE	mm|17qB1	14960	NM_010378	histocompatibility 2, class II antigen A, alpha	chr17:34421344-34421285	GO:0005515|GO:0005886|GO:0048002|GO:0002504|GO:0042613|GO:0005764|GO:0019886|GO:0006955|GO:0016020|GO:0019882|GO:0042605|GO:0016021|GO:0034341|GO:0045582|GO:0009897	NM_010378	Mm.235338
A_55_P1988202	Ifi203	Mus musculus interferon activated gene 203 (Ifi203), transcript variant 1, mRNA [NM_001045481]	7.68201	up	2.74405	-0.197436	chr1	175850536	-	FALSE	mm|1qH3	15950	NM_001045481	interferon activated gene 203	chr1:175850595-175850536	GO:0035458|GO:0005634	NM_001045481	Mm.472787
A_55_P2178653			6.85981	down	-6.39393	-3.61576	chr11	91784970	+	FALSE	mm|11qD				chr11:091784970-091785029
A_55_P2216976	D13Ertd608e	Mus musculus 2 days pregnant adult female oviduct cDNA, RIKEN full-length enriched library, clone:E230022M20 product:hypothetical protein, full insert sequence. [AK143258]	10.0015	up	-4.39759	-7.71974				FALSE		52673	AK143258	DNA segment, Chr 13, ERATO Doi 608, expressed				Mm.466870
A_55_P2171658	Stx3	Mus musculus syntaxin 3 (Stx3), transcript variant A, mRNA [NM_152220]	17.3883	up	-3.60679	-7.72684	chr19	11852038	-	FALSE	mm|19qA	20908	NM_152220	syntaxin 3	chr19:11852097-11852038	GO:0005515|GO:0043005|GO:0050544|GO:0005886|GO:0042581|GO:0042582|GO:0031201|GO:0006887|GO:0006886|GO:0031175|GO:0030426|GO:0005484|GO:0016324|GO:0006944|GO:0016020|GO:0005911|GO:0006810|GO:0006836|GO:0001950|GO:0034599|GO:0016021|GO:0016192	NM_152220	Mm.272264
A_55_P2004016	Crispld2	Mus musculus cysteine-rich secretory protein LCCL domain containing 2 (Crispld2), mRNA [NM_030209]	5.01362	up	-0.325487	-2.65134	chr8	122575417	+	FALSE	mm|8qE1	78892	NM_030209	cysteine-rich secretory protein LCCL domain containing 2	chr8:122575417-122575476	GO:0031012|GO:0030133|GO:0030198|GO:0005576|GO:0005539|GO:0008201	NM_030209	Mm.264680
A_51_P400543	Aif1	Mus musculus allograft inflammatory factor 1 (Aif1), mRNA [NM_019467]	22.3439	up	-0.574072	-5.05588	chr17	35307959	-	FALSE	mm|17qB1	11629	NM_019467	allograft inflammatory factor 1	chr17:35308018-35307959	GO:0005515|GO:0043066|GO:0030335|GO:0014739|GO:0005886|GO:0005884|GO:0005509|GO:0001891|GO:0003779|GO:0042995|GO:0048661|GO:0001726|GO:0030027|GO:0045429|GO:0005829|GO:0005737|GO:0051015|GO:0016020|GO:0010629|GO:0001934|GO:0043204|GO:0005856|GO:0051017	NM_019467	Mm.10747
A_52_P162298	Ydjc	Mus musculus YdjC homolog (bacterial) (Ydjc), mRNA [NM_026940]	39.6635	up	2.38319	-2.92655	chr16	17148730	+	FALSE	mm|16qA3	69101	NM_026940	YdjC homolog (bacterial)	chr16:17148730-17148789	GO:0008150|GO:0003674|GO:0016810|GO:0005975|GO:0005575	NM_026940	Mm.101656
A_51_P151126	Cd52	Mus musculus CD52 antigen (Cd52), mRNA [NM_013706]	5.75213	up	3.97651	1.45241	chr4	133649505	-	FALSE	mm|4qD3	23833	NM_013706	CD52 antigen	chr4:133649564-133649505	GO:0016020|GO:0005886|GO:0031225|GO:0007204	NM_013706	Mm.24130
A_55_P1996963	1110012J17Rik	Mus musculus RIKEN cDNA 1110012J17 gene (1110012J17Rik), transcript variant 1, mRNA [NM_001114098]	5.70437	up	-4.94258	-7.45465	chr17	66686499	-	FALSE	mm|17qE1.1	68617	NM_001114098	RIKEN cDNA 1110012J17 gene	chr17:66686558-66686499	GO:0008150|GO:0003674|GO:0005575	NM_001114098	Mm.33421
A_55_P2133370	Gm4610	PREDICTED: Mus musculus predicted gene 4610 (Gm4610), partial miscRNA [XR_104824]	5.18905	up	-5.13404	-7.50951	chr3	122080015	-	FALSE	mm|3qG1	100043726	XR_104824	predicted gene 4610	chr3:122080074-122080015	GO:0008150|GO:0003674|GO:0005575	XR_104824
A_66_P139683	Zbp1	Mus musculus Z-DNA binding protein 1 (Zbp1), transcript variant 1, mRNA [NM_021394]	6.80014	up	-4.86733	-7.63289	chr2	173032258	-	FALSE	mm|2qH3	58203	NM_021394	Z-DNA binding protein 1	chr2:173032317-173032258	GO:0008150|GO:0003692|GO:0005737|GO:0003726|GO:0003723|GO:0005634|GO:0003677	NM_021394	Mm.116687
A_51_P508959	Prr15	Mus musculus proline rich 15 (Prr15), mRNA [NM_030024]	6.13254	up	-5.10518	-7.72167	chr6	54280124	+	FALSE	mm|6qB3	78004	NM_030024	proline rich 15	chr6:54280124-54280183	GO:0008150|GO:0003674|GO:0007275|GO:0005575	NM_030024	Mm.41984
A_55_P1988994		predicted gene, 16798 [Source:MGI Symbol;Acc:MGI:4439722] [ENSMUST00000103314]	12.0521	down	-6.06617	-2.47495	chr6	67967417	+	FALSE	mm|6qC1		AY816714		chr6:67967417-67967476			Mm.424476
A_55_P2114187	Gm6522	PREDICTED: Mus musculus predicted gene 6522 (Gm6522), mRNA [XM_003086325]	5.40667	up	-3.52592	-5.96066	chr3	106100673	+	FALSE	mm|3qF2.3	624696	XM_003086325	predicted gene 6522	chr3:106100673-106100732		XM_003086325	Mm.389487
A_55_P1962937	Trem2	Mus musculus triggering receptor expressed on myeloid cells 2 (Trem2), mRNA [NM_031254]	40.2966	up	0.923563	-4.40902	chr17	48491537	+	FALSE	mm|17qC	83433	NM_031254	triggering receptor expressed on myeloid cells 2	chr17:48491537-48491596	GO:0007165|GO:0016020|GO:0005886|GO:0005576|GO:0004872|GO:0016021|GO:0004888	NM_031254	Mm.261623
A_55_P1991710	Gm5647	Mus musculus predicted gene 5647 (Gm5647), mRNA [NM_001037167]	6.98805	down	-6.34289	-3.538	chrX	151009919	-	FALSE	mm|XqF3	434881	NM_001037167	predicted gene 5647	chrX:151009978-151009919	GO:0008150|GO:0003674|GO:0005575	NM_001037167	Mm.357614
A_55_P2162695		predicted gene, 16602 [Source:MGI Symbol;Acc:MGI:4439526] [ENSMUST00000103564]	5.03675	down	-7.23923	-4.90673	chr13	19432102	+	FALSE	mm|13qA2		M77017		chr13:19432102-19432161			Mm.210785
A_55_P1967978	Nfatc2	Mus musculus nuclear factor of activated T-cells, cytoplasmic, calcineurin-dependent 2 (Nfatc2), transcript variant d, mRNA [NM_001136073]	6.08551	up	1.70405	-0.901324	chr2	168301974	-	FALSE	mm|2qH3	18019	NM_001136073	nuclear factor of activated T-cells, cytoplasmic, calcineurin-dependent 2	chr2:168302033-168301974	GO:0050853|GO:0005515|GO:0006355|GO:0003700|GO:0044212|GO:0005886|GO:0030890|GO:0042493|GO:0005634|GO:0001816|GO:0015629|GO:0003677|GO:0006351|GO:0006974|GO:0005829|GO:0043565|GO:0010628|GO:0005737|GO:0045944|GO:0045893	NM_001136073	Mm.116802
A_55_P1998601	Slc17a9	Mus musculus solute carrier family 17, member 9 (Slc17a9), mRNA [NM_183161]	12.2689	up	0.149817	-3.46712	chr2	180476906	+	FALSE	mm|2qH4	228993	NM_183161	solute carrier family 17, member 9	chr2:180476906-180476965	GO:0005215|GO:0016020|GO:0006810|GO:0016021|GO:0006887|GO:0055085	NM_183161	Mm.87189
A_51_P487555	Cd7	Mus musculus CD7 antigen (Cd7), mRNA [NM_009854]	16.6878	up	1.08858	-2.97215	chr11	120898068	-	FALSE	mm|11qE2	12516	NM_009854	CD7 antigen	chr11:120898127-120898068	GO:0048873|GO:0016020|GO:0004872|GO:0016021	NM_009854	Mm.4100
A_55_P2066505	Mpo	Mus musculus myeloperoxidase precursor (Mpo) mRNA, complete cds. [AY500847]	11.6508	up	1.32995	-2.21241	chr11	87615121	+	FALSE	mm|11qC	17523	AY500847	myeloperoxidase	chr11:87615121-87615180	GO:0050830|GO:0050832|GO:0005625|GO:0001878|GO:0005615|GO:0002679|GO:0005739|GO:0004601|GO:0034374|GO:0019430|GO:0044130|GO:0030141|GO:0042744|GO:0006979|GO:0008201|GO:0055114|GO:0002149		Mm.4668
A_52_P327664	Gbp5	Mus musculus guanylate binding protein 5 (Gbp5), mRNA [NM_153564]	12.2097	up	-3.8817	-7.49166	chr3	142184779	+	FALSE	mm|3qH1	229898	NM_153564	guanylate binding protein 5	chr3:142184779-142184838	GO:0071346|GO:0031410	NM_153564	Mm.459245
A_51_P469951	Srgap3	Mus musculus SLIT-ROBO Rho GTPase activating protein 3 (Srgap3), mRNA [NM_080448]	6.14907	up	-2.50797	-5.12834	chr6	112668239	-	FALSE	mm|6qE3	259302	NM_080448	SLIT-ROBO Rho GTPase activating protein 3	chr6:112668298-112668239	GO:0005622|GO:0005515|GO:0008150|GO:0007165|GO:0005575|GO:0005096	NM_080448	Mm.236401
A_51_P217463	Cxcl2	Mus musculus chemokine (C-X-C motif) ligand 2 (Cxcl2), mRNA [NM_009140]	12.2113	up	-4.15199	-7.76214	chr5	91334534	+	FALSE	mm|5qE1	20310	NM_009140	chemokine (C-X-C motif) ligand 2	chr5:91334534-91334593	GO:0008009|GO:0006955|GO:0006954|GO:0006935|GO:0030595|GO:0030593|GO:0002237|GO:0005576|GO:0005615|GO:0005125	NM_009140	Mm.4979
A_55_P2017600	Crmp1	Mus musculus collapsin response mediator protein 1 (Crmp1), transcript variant 2, mRNA [NM_007765]	25.4953	up	-0.362991	-5.03515	chr5	37683228	+	FALSE	mm|5qB3	12933	NM_007765	collapsin response mediator protein 1	chr5:37683228-37683287	GO:0051219|GO:0005737|GO:0016810|GO:0016787|GO:0016812|GO:0043025|GO:0005856|GO:0030425|GO:0006208	NM_007765	Mm.290995
A_55_P2054200	Tnip3	Mus musculus TNFAIP3 interacting protein 3 (Tnip3), mRNA [NM_001001495]	5.62788	up	-3.70449	-6.19708	chr6	65564732	+	FALSE	mm|6qC1	414084	NM_001001495	TNFAIP3 interacting protein 3	chr6:65564732-65581072	GO:0008150|GO:0003674|GO:0005575	NM_001001495	Mm.117558
A_55_P1999648	Plin2	Mus musculus perilipin 2 (Plin2), mRNA [NM_007408]	13.7706	up	2.49173	-1.29179	chr4	86302847	-	FALSE	mm|4qC4	11520	NM_007408	perilipin 2	chr4:86302906-86302847	GO:0005811|GO:0005515|GO:0005737|GO:0016020|GO:0005886|GO:0019915|GO:0005634|GO:0015909	NM_007408	Mm.381
A_55_P2042016			12.6649	up	-1.64838	-5.31114	chr5	143198391	+	FALSE	mm|5qG2				chr5:143198391-143198450
A_55_P2063736	Gp49a	Mus musculus glycoprotein 49 A (Gp49a), mRNA [NM_008147]	51.8501	up	0.731638	-4.96464	chr10	51201615	+	FALSE	mm|10qB3	14727	NM_008147	glycoprotein 49 A	chr10:51201615-51201674	GO:0016020|GO:0016021	NM_008147	Mm.439661
A_51_P305628	Atp8a2	Mus musculus ATPase, aminophospholipid transporter-like, class I, type 8A, member 2 (Atp8a2), mRNA [NM_015803]	11.4712	up	-3.9961	-7.51605	chr14	60266616	-	FALSE	mm|14qD1	50769	NM_015803	ATPase, aminophospholipid transporter-like, class I, type 8A, member 2	chr14:60266675-60266616	GO:0006754|GO:0000287|GO:0016787|GO:0016020|GO:0015914|GO:0000166|GO:0004012|GO:0016820|GO:0016021|GO:0005524|GO:0046872|GO:0015662	NM_015803	Mm.319599
A_52_P69558	Gm8221	Mus musculus predicted gene 8221 (Gm8221), non-coding RNA [NR_033577]	22.846	up	-2.6464	-7.16027	chr15	77457384	+	FALSE	mm|15qE1	666661	NR_033577	apolipoprotein L 7c pseudogene	chr15:77457384-77457443		NR_033577	Mm.390818
A_55_P2032147	Wnt9a	Mus musculus wingless-type MMTV integration site 9A (Wnt9a), mRNA [NM_139298]	6.03606	up	-1.98939	-4.583	chr11	59146953	+	FALSE	mm|11qB1.3	216795	NM_139298	wingless-type MMTV integration site 9A	chr11:59146953-59147012	GO:0005515|GO:0009798|GO:0008285|GO:0005886|GO:0031575|GO:0045597|GO:0048704|GO:0009952|GO:0005615|GO:0045880|GO:0060548|GO:0032331|GO:0016055|GO:0043154|GO:0060070|GO:0001664|GO:0005578|GO:0005102|GO:0007275|GO:0005576|GO:0000122|GO:0048856|GO:0007492|GO:0035117|GO:0061037	NM_139298	Mm.218794
A_51_P200561	4930506M07Rik	Mus musculus RIKEN cDNA 4930506M07 gene (4930506M07Rik), transcript variant 2, mRNA [NM_175172]	41.2994	up	-2.42191	-7.78996	chr19	59048041	-	FALSE	mm|19qD3	71653	NM_175172	RIKEN cDNA 4930506M07 gene	chr19:59048100-59048041	GO:0003674|GO:0051899|GO:0007275|GO:0042995|GO:0007409|GO:0030426	NM_175172	Mm.37338
A_51_P346165	Agpat4	Mus musculus 1-acylglycerol-3-phosphate O-acyltransferase 4 (lysophosphatidic acid acyltransferase, delta) (Agpat4), mRNA [NM_026644]	5.95737	up	0.129612	-2.44506	chr17	12412423	+	FALSE	mm|17qA1	68262	NM_026644	1-acylglycerol-3-phosphate O-acyltransferase 4 (lysophosphatidic acid acyltransferase, delta)	chr17:12412423-12412482	GO:0008150|GO:0003674|GO:0016020|GO:0008152|GO:0016021|GO:0008654|GO:0005575|GO:0003841|GO:0016740|GO:0008415	NM_026644	Mm.258300
A_52_P463977	Tmem140	Mus musculus transmembrane protein 140 (Tmem140), mRNA [NM_197986]	5.25022	up	-1.62521	-4.01759	chr6	34823772	+	FALSE	mm|6qB1	68487	NM_197986	transmembrane protein 140	chr6:34823772-34823831	GO:0008150|GO:0003674|GO:0016020|GO:0016021|GO:0005575	NM_197986	Mm.248440
A_51_P460954	Ccl6	Mus musculus chemokine (C-C motif) ligand 6 (Ccl6), mRNA [NM_009139]	76.3	up	1.38907	-4.86454	chr11	83401997	-	FALSE	mm|11qC	20305	NM_009139	chemokine (C-C motif) ligand 6	chr11:83402056-83401997	GO:0008009|GO:0006955|GO:0006935|GO:0060326|GO:0005576|GO:0005615|GO:0005125	NM_009139	Mm.137
A_55_P2046092	Xlr4d-ps	PREDICTED: Mus musculus X-linked lymphocyte-regulated 4D, pseudogene (Xlr4d-ps), mRNA [XM_003086835]	27.701	down	-7.55134	-2.75947	chrX	71979593	+	FALSE	mm|XqA7.3	667387	XM_003086835	X-linked lymphocyte-regulated 4D, pseudogene	chrX:71979593-71979652		XM_003086835
A_55_P2085905	Anpep	Mus musculus alanyl (membrane) aminopeptidase (Anpep), mRNA [NM_008486]	34.6839	up	0.244944	-4.87125	chr7	86966716	-	FALSE	mm|7qD3	16790	NM_008486	alanyl (membrane) aminopeptidase	chr7:86966775-86966716	GO:0004177|GO:0008152	NM_008486	Mm.4487
A_51_P469285	Nrp1	Mus musculus neuropilin 1 (Nrp1), mRNA [NM_008737]	8.63642	up	-3.85773	-6.96816	chr8	131026650	+	FALSE	mm|8qE2	18186	NM_008737	neuropilin 1	chr8:131026650-131026709	GO:0005515|GO:0030424|GO:0005886|GO:0005883|GO:0048843|GO:0030426|GO:0007507|GO:0007413|GO:0017154|GO:0019838|GO:0007411|GO:0030517|GO:0060666|GO:0043025|GO:0005021|GO:0048010|GO:0001569|GO:0009986|GO:0001525|GO:0016358|GO:0048485|GO:0007165|GO:0016477|GO:0048841|GO:0021636	NM_008737	Mm.271745
A_51_P104608	Rnase6	Mus musculus ribonuclease, RNase A family, 6 (Rnase6), mRNA [NM_030098]	5.40808	up	-2.411	-4.84611	chr14	51750572	+	FALSE	mm|14qC1	78416	NM_030098	ribonuclease, RNase A family, 6	chr14:51750572-51750631	GO:0008150|GO:0003674|GO:0004518|GO:0004519|GO:0016787|GO:0004522|GO:0005575|GO:0003676	NM_030098	Mm.103835
A_55_P2038452			7.41363	up	-0.660382	-3.55056	chr8	74512371	-	FALSE	mm|8qB3.3				chr8:074512430-074512371
A_51_P423578	Slfn2	Mus musculus schlafen 2 (Slfn2), mRNA [NM_011408]	56.0998	up	-0.178714	-5.98864	chr11	82883791	+	FALSE	mm|11qC	20556	NM_011408	schlafen 2	chr11:82883791-82883850	GO:0008285	NM_011408	Mm.278689
A_55_P2067362	Dpep2	dipeptidase 2 [Source:MGI Symbol;Acc:MGI:2442042] [ENSMUST00000034373]	20.0032	up	-1.19244	-5.51459	chr8	108508850	-	FALSE	mm|8qD3	319446	AK089244	dipeptidase 2	chr8:108508909-108508850	GO:0005575|GO:0031225|GO:0016805|GO:0046872|GO:0016020|GO:0016787|GO:0008152|GO:0006508|GO:0008235|GO:0008233|GO:0008239|GO:0008237|GO:0008238		Mm.248357
A_55_P2160286	Olfm1	Mus musculus olfactomedin 1 (Olfm1), transcript variant 2, mRNA [NM_001038612]	16.82	up	-2.73385	-6.80595	chr2	28068147	+	FALSE	mm|2qA3	56177	NM_001038612	olfactomedin 1	chr2:28068147-28068206	GO:0005515|GO:0005783|GO:0007275|GO:0051259|GO:0005615	NM_001038612	Mm.43278
A_55_P2011146	Reep1	Mus musculus receptor accessory protein 1 (Reep1), nuclear gene encoding mitochondrial protein, mRNA [NM_178608]	6.01818	up	0.562508	-2.02682	chr6	71760628	+	FALSE	mm|6qC1	52250	NM_178608	receptor accessory protein 1	chr6:71760628-71760687	GO:0005739|GO:0005737|GO:0016020|GO:0051205|GO:0016021|GO:0031849	NM_178608	Mm.146332
A_52_P17146	Bmpr1a	Mus musculus bone morphogenetic protein receptor, type 1A (Bmpr1a), mRNA [NM_009758]	10.0259	up	-4.45358	-7.77924	chr14	35224339	-	FALSE	mm|14qB	12166	NM_009758	bone morphogenetic protein receptor, type 1A	chr14:35224398-35224339	GO:0005515|GO:0035137|GO:0007389|GO:0060896|GO:0051216|GO:0001756|GO:0046332|GO:0048598|GO:0030154|GO:0042803|GO:0007507|GO:0060914|GO:0048589|GO:0000166|GO:0016301|GO:0048352|GO:0043025|GO:0016772|GO:0050679|GO:0048339|GO:0001707|GO:0030501|GO:0003272|GO:0030509|GO:0060391|GO:0001701|GO:0016310|GO:0048382|GO:0042733|GO:0005886|GO:0030324|GO:0021983|GO:0009953|GO:0009952|GO:0009950|GO:0030425|GO:…	NM_009758	Mm.237825
A_55_P2170309	Ppfibp2	Mus musculus PTPRF interacting protein, binding protein 2 (liprin beta 2) (Ppfibp2), transcript variant 1, mRNA [NM_008905]	5.61801	up	-3.65734	-6.1474	chr7	114887808	+	FALSE	mm|7qE3	19024	NM_008905	PTPRF interacting protein, binding protein 2 (liprin beta 2)	chr7:114887808-114887867	GO:0008907|GO:0015074|GO:0003677	NM_008905	Mm.2817
A_51_P316042	Card11	Mus musculus caspase recruitment domain family, member 11 (Card11), mRNA [NM_175362]	7.60629	up	0.368732	-2.55846	chr5	141348979	-	FALSE	mm|5qG2	108723	NM_175362	caspase recruitment domain family, member 11	chr5:141349038-141348979	GO:0050700|GO:0005515|GO:0045577|GO:0005886|GO:0030890|GO:0031295|GO:0042981|GO:0001819|GO:0005829|GO:0005622|GO:0045086|GO:0007165|GO:0005737|GO:0051092|GO:0016020|GO:0050870|GO:0045061|GO:0050776|GO:0042102|GO:0045580|GO:0045121|GO:0043123	NM_175362	Mm.46187
A_51_P411345	Mogat2	Mus musculus monoacylglycerol O-acyltransferase 2 (Mogat2), mRNA [NM_177448]	10.0632	up	-3.76942	-7.10044	chr7	106367601	-	FALSE	mm|7qE2	233549	NM_177448	monoacylglycerol O-acyltransferase 2	chr7:106367660-106367601	GO:0006629|GO:0008610|GO:0016747|GO:0005783|GO:0003846|GO:0006071|GO:0050892|GO:0016020|GO:0019432|GO:0006651|GO:0016407|GO:0016021|GO:0046462|GO:0016740|GO:0008415	NM_177448	Mm.208030
A_52_P499028	9130008F23Rik	Mus musculus RIKEN cDNA 9130008F23 gene (9130008F23Rik), mRNA [NM_027834]	6.15938	up	-5.20289	-7.82568	chr17	41013305	-	FALSE	mm|17qB2	71583	NM_027834	RIKEN cDNA 9130008F23 gene	chr17:41013364-41013305	GO:0008150|GO:0003674|GO:0005575	NM_027834	Mm.158733
A_52_P308413	1810011H11Rik	Mus musculus RIKEN cDNA 1810011H11 gene (1810011H11Rik), mRNA [NM_001163616]	5.3499	up	-5.41098	-7.83049	chr14	33630901	+	FALSE	mm|14qB	69069	NM_001163616	RIKEN cDNA 1810011H11 gene	chr14:33630901-33630960	GO:0008150|GO:0003674|GO:0005575	NM_001163616	Mm.261609
A_55_P2093433	Kcnk12	Mus musculus potassium channel, subfamily K, member 12 (Kcnk12), mRNA [NM_199251]	7.02905	up	-3.19162	-6.00495	chr17	88145628	-	FALSE	mm|17qE4	210741	NM_199251	potassium channel, subfamily K, member 12	chr17:88145687-88145628	GO:0008150|GO:0003674|GO:0016020|GO:0006810|GO:0016021|GO:0005575|GO:0005216|GO:0006811	NM_199251	Mm.312046
A_55_P2124582	Xlr4a	Mus musculus X-linked lymphocyte-regulated 4A (Xlr4a), mRNA [NM_001081642]	10.9854	down	-4.28645	-0.82893	chrX	70326874	-	FALSE	mm|XqA7.3	434794	NM_001081642	X-linked lymphocyte-regulated 4A	chrX:70326933-70326874	GO:0008150|GO:0003674|GO:0005575	NM_001081642	Mm.104764
A_55_P2151609	Sorl1	Mus musculus sortilin-related receptor, LDLR class A repeats-containing (Sorl1), mRNA [NM_011436]	111.997	up	-0.969741	-7.77705	chr9	41776572	-	FALSE	mm|9qA5.1	20660	NM_011436	sortilin-related receptor, LDLR class A repeats-containing	chr9:41776631-41776572	GO:0005515|GO:0048471|GO:0016477|GO:0005771|GO:0043025|GO:0030169	NM_011436	Mm.121920
A_55_P2068892	Il6ra	Mus musculus interleukin 6 receptor, alpha (Il6ra), mRNA [NM_010559]	15.8463	up	2.37244	-1.61363	chr3	89674054	-	FALSE	mm|3qF1	16194	NM_010559	interleukin 6 receptor, alpha	chr3:89674113-89674054	GO:0032755|GO:0008284|GO:0070119|GO:0005886|GO:0019221|GO:0050731|GO:0019981|GO:0005615|GO:0042803|GO:0016324|GO:0004872|GO:0070102|GO:0034097|GO:0010536|GO:0004896|GO:0009986|GO:0004915|GO:0042517|GO:0005896|GO:0005576|GO:0032722|GO:0070120|GO:0045768|GO:0048661|GO:0046427|GO:0016020|GO:0032966|GO:0031018|GO:0016049|GO:0016021|GO:0019899|GO:0043410	NM_010559	Mm.2856
A_52_P630429		immunoglobulin kappa variable 2-116 [Source:MGI Symbol;Acc:MGI:3647785] [ENSMUST00000103318]	6.33254	down	-7.74342	-5.08064	chr6	68102545	+	FALSE	mm|6qC1		EU568236		chr6:68102545-68102604			Mm.474429
A_52_P423814	Cox8b	Mus musculus cytochrome c oxidase, subunit VIIIb (Cox8b), nuclear gene encoding mitochondrial protein, mRNA [NM_007751]	12.358	down	-3.40209	0.225282	chr7	148084852	-	FALSE	mm|7qF5	12869	NM_007751	cytochrome c oxidase, subunit VIIIb	chr7:148084911-148084852	GO:0005739|GO:0016020|GO:0004129|GO:0005743|GO:0016021|GO:0055114	NM_007751	Mm.3841
A_55_P2117342		immunoglobulin kappa variable 2-116 [Source:MGI Symbol;Acc:MGI:3647785] [ENSMUST00000103318]	8.55856	down	-7.67441	-4.57705	chr6	68102529	+	FALSE	mm|6qC1		S74547		chr6:68102529-68102588			Mm.333124
A_52_P220810	Trib2	Mus musculus tribbles homolog 2 (Drosophila) (Trib2), mRNA [NM_144551]	8.75637	up	-4.58227	-7.7126	chr12	15799009	-	FALSE	mm|12qA1.1	217410	NM_144551	tribbles homolog 2 (Drosophila)	chr12:15799068-15799009	GO:0005515|GO:0045599|GO:0032436|GO:0005634|GO:0005524|GO:0043086|GO:0043433|GO:0005737|GO:0004672|GO:0004860|GO:0055106|GO:0051443|GO:0006468|GO:0045081|GO:0005856|GO:0031625|GO:0008134|GO:0016772	NM_144551	Mm.485040
A_55_P2145389	Flrt3	Mus musculus fibronectin leucine rich transmembrane protein 3 (Flrt3), transcript variant 1, mRNA [NM_001172160]	8.74939	up	-3.80173	-6.93091	chr2	140484265	-	FALSE	mm|2qF3	71436	NM_001172160	fibronectin leucine rich transmembrane protein 3	chr2:140484324-140484265	GO:0016021	NM_001172160	Mm.426781
A_55_P2041700	Hoxa11as	Mus musculus HOXA11 antisense RNA (non-protein coding) (Hoxa11as), non-coding RNA [NR_015348]	13.9577	down	-1.97117	1.83182	chr6	52199709	+	FALSE	mm|6qB3	15397	NR_015348	HOXA11 antisense RNA (non-protein coding)	chr6:52199709-52199768		NR_015348	Mm.469918
A_55_P2046101	Xlr4b	Mus musculus X-linked lymphocyte-regulated 4B (Xlr4b), mRNA [NM_021365]	13.6789	down	-2.76658	1.0073	chrX	70467477	+	FALSE	mm|XqA7.3	27083	NM_021365	X-linked lymphocyte-regulated 4B	chrX:70467477-70467536	GO:0008150|GO:0003674|GO:0005575	NM_021365	Mm.104764
A_51_P167292	Chi3l3	Mus musculus chitinase 3-like 3 (Chi3l3), mRNA [NM_009892]	12.9388	up	-0.91318	-4.60681	chr3	105950485	-	FALSE	mm|3qF2.2	12655	NM_009892	chitinase 3-like 3	chr3:105950544-105950485	GO:0004563|GO:0006032|GO:0005975|GO:0043169|GO:0005529|GO:0005576|GO:0003824|GO:0004553|GO:0008061|GO:0006954|GO:0008152|GO:0016023|GO:0004568	NM_009892	Mm.387173
A_51_P235984	Il10ra	Mus musculus interleukin 10 receptor, alpha (Il10ra), mRNA [NM_008348]	7.44084	up	0.0741687	-2.8213	chr9	45062237	-	FALSE	mm|9qA5.2	16154	NM_008348	interleukin 10 receptor, alpha	chr9:45062296-45062237	GO:0005737|GO:0016020|GO:0004872|GO:0016021	NM_008348	Mm.379327
A_52_P602091	Csf1r	Mus musculus colony stimulating factor 1 receptor (Csf1r), mRNA [NM_001037859]	36.8316	up	-0.20711	-5.40998	chr18	61289398	+	FALSE	mm|18qE1	12978	NM_001037859	colony stimulating factor 1 receptor	chr18:61289398-61289758	GO:0005515|GO:0005886|GO:0008283|GO:0045672|GO:0005524|GO:0042803|GO:0043235|GO:0016310|GO:0019955|GO:0004672|GO:0000166|GO:0016020|GO:0016301|GO:0004872|GO:0006468|GO:0004713|GO:0016021|GO:0004714|GO:0007169|GO:0016740|GO:0016772	NM_001037859	Mm.22574
A_51_P212782	Il1b	Mus musculus interleukin 1 beta (Il1b), mRNA [NM_008361]	36.8714	up	-2.67612	-7.88055	chr2	129190347	-	FALSE	mm|2qF1	16176	NM_008361	interleukin 1 beta	chr2:129190406-129190347	GO:0032755|GO:0019221|GO:0046330|GO:0050900|GO:0005615|GO:0042221|GO:0032757|GO:0031622|GO:0030730|GO:0001660|GO:0032496|GO:0033198|GO:0051781|GO:0007613|GO:0043123|GO:0043122|GO:0032729|GO:0045410|GO:0032725|GO:0030593|GO:0019904|GO:0007568|GO:0045840|GO:0005125|GO:0045086|GO:0035176|GO:0008083|GO:0045833|GO:0045080|GO:0042346|GO:0051044|GO:0050996|GO:0050995|GO:0008285|GO:0014050|GO:0032874|GO:…	NM_008361	Mm.222830
A_55_P2005672			58.6637	up	0.0704598	-5.80394	chr1	178767319	+	FALSE	mm|1qH4				chr1:178767319-178767378
A_55_P2183433	Rab30	Mus musculus RAB30, member RAS oncogene family (Rab30), mRNA [NM_029494]	5.71765	up	-4.71751	-7.23293	chr7	99985062	+	FALSE	mm|7qE1	75985	NM_029494	RAB30, member RAS oncogene family	chr7:99985062-99985121	GO:0008150|GO:0003674|GO:0016020|GO:0005886|GO:0000166|GO:0007264|GO:0005575|GO:0015031|GO:0005525	NM_029494	Mm.389966
A_55_P2064771	Ly6c1	Mus musculus lymphocyte antigen 6 complex, locus C1 (Ly6c1), mRNA [NM_010741]	7.06928	up	2.80925	-0.0123119	chr15	74875495	-	FALSE	mm|15qD3	17067	NM_010741	lymphocyte antigen 6 complex, locus C1	chr15:74875554-74875495	GO:0016020|GO:0005886|GO:0031225|GO:0009897	NM_010741	Mm.1583
A_55_P1957459	Lilrb4	Mus musculus leukocyte immunoglobulin-like receptor, subfamily B, member 4 (Lilrb4), mRNA [NM_013532]	94.8312	up	3.93985	-2.62744	chr10	51216160	+	FALSE	mm|10qB3	14728	NM_013532	leukocyte immunoglobulin-like receptor, subfamily B, member 4	chr10:51216160-51216219	GO:0016020|GO:0005886|GO:0004872|GO:0016021	NM_013532	Mm.34408
A_55_P2088145			5.64464	up	-3.93255	-6.42943	chr19	60157658	+	FALSE	mm|19qD3				chr19:060157658-060157717
A_55_P2444515	Akap2	Mus musculus A kinase (PRKA) anchor protein 2 (Akap2), transcript variant 2, mRNA [NM_001035532]	6.79261	up	-4.47595	-7.23992	chr4	57907544	+	FALSE	mm|4qB3	11641	NM_001035532	A kinase (PRKA) anchor protein 2	chr4:57907544-57907603	GO:0005515|GO:0043234|GO:0016310|GO:0008104|GO:0016301|GO:0019904|GO:0007178|GO:0007015|GO:0051018|GO:0051291	NM_001035532	Mm.485406
A_55_P2009952	Me1	Mus musculus malic enzyme 1, NADP(+)-dependent, cytosolic (Me1), transcript variant 2, mRNA [NM_001198933]	5.00124	up	-2.86816	-5.19045	chr9	86475077	-	FALSE	mm|9qE3.1	17436	NM_001198933	malic enzyme 1, NADP(+)-dependent, cytosolic	chr9:86475136-86475077	GO:0050661|GO:0030145|GO:0051262|GO:0004470|GO:0004473|GO:0006108|GO:0004471|GO:0005625|GO:0046872|GO:0005829|GO:0005739|GO:0016491|GO:0009725|GO:0055114	NM_001198933	Mm.148155
A_55_P1987730	5730469M10Rik	Mus musculus RIKEN cDNA 5730469M10 gene (5730469M10Rik), mRNA [NM_027464]	8.32177	up	-1.75852	-4.81541	chr14	41807029	-	FALSE	mm|14qB	70564	NM_027464	RIKEN cDNA 5730469M10 gene	chr14:41807088-41807029	GO:0005739|GO:0008150|GO:0003674|GO:0016209|GO:0016491|GO:0005576|GO:0055114	NM_027464	Mm.27227
A_55_P2018061	Cd209a	Mus musculus CD209a antigen (Cd209a), mRNA [NM_133238]	16.3435	up	-3.83685	-7.8675	chr8	3743481	-	FALSE	mm|8qA1.1	170786	NM_133238	CD209a antigen	chr8:3743540-3743481	GO:0008150|GO:0016020|GO:0005488|GO:0005529|GO:0004872|GO:0016021|GO:0005537|GO:0046872|GO:0006897	NM_133238	Mm.32510
A_55_P1959633	Hnf4a	Mus musculus hepatic nuclear factor 4, alpha (Hnf4a), mRNA [NM_008261]	5.6953	up	-3.6875	-6.19727	chr2	163398548	+	FALSE	mm|2qH3	15378	NM_008261	hepatic nuclear factor 4, alpha	chr2:163398548-163398607	GO:0005515|GO:2000189|GO:0030308|GO:0006805|GO:0003700|GO:0044212|GO:0003705|GO:0050732|GO:0003707|GO:0030154|GO:0042803|GO:0010470|GO:0033159|GO:0007548|GO:0006591|GO:0004879|GO:0000062|GO:0006637|GO:0005504|GO:0023019|GO:0016290|GO:0045216|GO:0019216|GO:0045930|GO:0055091|GO:0008270|GO:0045893|GO:0008134|GO:0006629|GO:0008285|GO:0032534|GO:0042524|GO:0070328|GO:0005634|GO:0060395|GO:0046872|GO:…	NM_008261	Mm.202383
A_55_P2019601	Csprs	Mus musculus component of Sp100-rs (Csprs), mRNA [NM_033616]	10.92	up	-1.29277	-4.74166	chr8_random	111572	-	FALSE		114564	NM_033616	component of Sp100-rs	chr8_random:111631-111572		NM_033616	Mm.362644
A_55_P2070869	Lcn2	Mus musculus lipocalin 2 (Lcn2), mRNA [NM_008491]	7.85201	up	-1.51463	-4.48769	chr2	32240199	-	FALSE	mm|2qB	16819	NM_008491	lipocalin 2	chr2:32240258-32240199	GO:0005515|GO:0005215|GO:0070301|GO:0005506|GO:0042493|GO:0006915|GO:0042981|GO:0005576|GO:0009635|GO:0002020|GO:0009615|GO:0055072|GO:0005615|GO:0042803|GO:0005829|GO:0010628|GO:0070207|GO:0031346|GO:0005488|GO:0045087|GO:0006810|GO:0015891|GO:0006811	NM_008491	Mm.9537
A_66_P114582		immunoglobulin heavy variable V1-54 [Source:MGI Symbol;Acc:MGI:3647133] [ENSMUST00000103525]	7.01109	up	-3.37297	-6.18261	chr12	116432036	-	FALSE	mm|12qF2		AF303844		chr12:116432095-116432036			Mm.313452
A_55_P2024888	Ctss	Mus musculus cathepsin S (Ctss), mRNA [NM_021281]	21.2778	up	3.63788	-0.773398	chr3	95360245	+	FALSE	mm|3qF2.1	13040	NM_021281	cathepsin S	chr3:95360245-95360304	GO:0016787|GO:0016020|GO:0006508|GO:0008233|GO:0008234|GO:0005764|GO:0043231	NM_021281	Mm.3619
A_52_P113537	Xist	Mus musculus inactive X specific transcripts (Xist), transcript variant 1, non-coding RNA [NR_001463]	642.933	down	-7.64557	1.68296	chrX	100656289	-	FALSE	mm|XqD	213742	NR_001463	inactive X specific transcripts	chrX:100656348-100656289	GO:0005694|GO:0009048	NR_001463	Mm.274770
A_51_P296528	Lass4	Mus musculus LAG1 homolog, ceramide synthase 4 (Lass4), mRNA [NM_026058]	12.6485	up	-0.955763	-4.61665	chr8	4523988	+	FALSE	mm|8qA1.1	67260	NM_026058	LAG1 homolog, ceramide synthase 4	chr8:4523988-4524047	GO:0043565|GO:0008610|GO:0006355|GO:0003700|GO:0016020|GO:0005783|GO:0030148|GO:0005634|GO:0050291|GO:0016021|GO:0046513|GO:0003677	NM_026058	Mm.35511
A_55_P2100103	Htr7	Mus musculus 5-hydroxytryptamine (serotonin) receptor 7 (Htr7), mRNA [NM_008315]	5.50902	up	-5.3471	-7.8089	chr19	36033339	-	FALSE	mm|19qC2	15566	NM_008315	5-hydroxytryptamine (serotonin) receptor 7	chr19:36033398-36033339	GO:0007165|GO:0004993|GO:0007186|GO:0005886|GO:0004930|GO:0030594|GO:0007268|GO:0004872|GO:0016021|GO:0004871|GO:0007210|GO:0007192	NM_008315	Mm.254266
A_51_P173114	Cdhr1	Mus musculus cadherin-related family member 1 (Cdhr1), mRNA [NM_130878]	14.258	up	-4.00174	-7.83544	chr14	37891387	-	FALSE	mm|14qB	170677	NM_130878	cadherin-related family member 1	chr14:37891446-37891387	GO:0005515|GO:0016020|GO:0005886|GO:0042622|GO:0009987|GO:0005887|GO:0005509|GO:0004872|GO:0016021|GO:0045494|GO:0007155|GO:0007156	NM_130878	Mm.156506
A_66_P106388	Ms4a4c	Mus musculus membrane-spanning 4-domains, subfamily A, member 4C (Ms4a4c), mRNA [NM_029499]	59.6989	up	-1.95192	-7.85155	chr19	11500973	+	FALSE	mm|19qA	64380	NM_029499	membrane-spanning 4-domains, subfamily A, member 4C	chr19:11500973-11501032	GO:0008150|GO:0003674|GO:0005575	NM_029499	Mm.440715
A_51_P405638		immunoglobulin heavy variable V9-3 [Source:MGI Symbol;Acc:MGI:3642720] [ENSMUST00000103473]	9.06851	up	-4.65026	-7.83112	chr12	115379078	-	FALSE	mm|12qF1		S63552		chr12:115379137-115379078			Mm.313360
A_52_P97699	D430019H16Rik	Mus musculus RIKEN cDNA D430019H16 gene, mRNA (cDNA clone IMAGE:6834465), partial cds. [BC058677]	7.23496	up	-1.56274	-4.41773	chr12	106731169	+	FALSE	mm|12qE	268595	BC058677	RIKEN cDNA D430019H16 gene	chr12:106731169-106731228	GO:0008150|GO:0003674|GO:0005575		Mm.2388
A_55_P2005320	Tm7sf4	Mus musculus transmembrane 7 superfamily member 4 (Tm7sf4), mRNA [NM_029422]	5.52424	up	-4.37945	-6.84522	chr15	39592421	+	FALSE	mm|15qB3.1	75766	NM_029422	transmembrane 7 superfamily member 4	chr15:39592421-39592480	GO:0016020|GO:0009986|GO:0005886|GO:0030316|GO:0016021	NM_029422	Mm.159563
A_55_P2149575	Sdr39u1	Mus musculus short chain dehydrogenase/reductase family 39U, member 1 (Sdr39u1), mRNA [NM_001082975]	15.1789	up	-2.48248	-6.40647	chr14	56516445	-	FALSE	mm|14qC3	654795	NM_001082975	short chain dehydrogenase/reductase family 39U, member 1	chr14:56516504-56516445	GO:0050662|GO:0008150|GO:0003674|GO:0005488|GO:0005575|GO:0003824|GO:0044237	NM_001082975	Mm.387102
A_52_P586004	Hk3	Mus musculus hexokinase 3 (Hk3), nuclear gene encoding mitochondrial protein, transcript variant 1, mRNA [NM_001033245]	39.9963	up	-2.17707	-7.49887	chr13	55107900	-	FALSE	mm|13qB1	212032	NM_001033245	hexokinase 3	chr13:55107959-55107900	GO:0005975|GO:0042562|GO:0004396|GO:0003824|GO:0005524|GO:0006096|GO:0005739|GO:0043234|GO:0016310|GO:0000166|GO:0016301|GO:0008152|GO:0016773|GO:0046835|GO:0019899|GO:0016740	NM_001033245	Mm.267479
A_55_P1996354	Wdr31	Mus musculus WD repeat domain 31 (Wdr31), mRNA [NM_023597]	7.34505	up	-4.73264	-7.60941	chr4	62114769	-	FALSE	mm|4qB3	71354	NM_023597	WD repeat domain 31	chr4:62114828-62114769	GO:0008150|GO:0003674|GO:0005575	NM_023597	Mm.155573
A_51_P364210	Ms4a3	Mus musculus membrane-spanning 4-domains, subfamily A, member 3 (Ms4a3), mRNA [NM_133246]	7.81617	up	-3.97378	-6.94024	chr19	11704055	-	FALSE	mm|19qA	170813	NM_133246	membrane-spanning 4-domains, subfamily A, member 3	chr19:11704114-11704055	GO:0008150|GO:0003674|GO:0016020|GO:0004872|GO:0016021	NM_133246	Mm.240438
A_51_P460048	Cnrip1	Mus musculus cannabinoid receptor interacting protein 1 (Cnrip1), mRNA [NM_029861]	8.2063	up	-1.41448	-4.45121	chr11	16979270	+	FALSE	mm|11qA2	380686	NM_029861	cannabinoid receptor interacting protein 1	chr11:16979270-16979329	GO:0008150|GO:0003674|GO:0005575	NM_029861	Mm.425666
A_55_P2472735	A530032D15Rik	Mus musculus RIKEN cDNA A530032D15Rik gene (A530032D15Rik), mRNA [NM_213615]	6.15862	up	-0.92354	-3.54615	chr1	85085196	-	FALSE	mm|1qC5	381287	NM_213615	RIKEN cDNA A530032D15Rik gene	chr1:85085255-85085196	GO:0008150|GO:0003674|GO:0005575	NM_213615	Mm.386456
A_55_P2023692	Neurl1a	Mus musculus neuralized homolog 1A (Drosophila) (Neurl1a), transcript variant 1, mRNA [NM_021360]	5.35797	down	-3.91164	-1.48995	chr19	47333871	+	FALSE	mm|19qC3	18011	NM_021360	neuralized homolog 1A (Drosophila)	chr19:47333871-47333930	GO:0005515|GO:0009605|GO:0005737|GO:0007595|GO:0005886|GO:0007288|GO:0008270|GO:0005634|GO:0030317|GO:0046872	NM_021360	Mm.313651
A_51_P121031	March1	Mus musculus membrane-associated ring finger (C3HC4) 1 (March1), transcript variant 3, mRNA [NM_175188]	38.2411	up	-1.06531	-6.32236	chr8	68994134	+	FALSE	mm|8qB3.2	72925	NM_175188	membrane-associated ring finger (C3HC4) 1	chr8:68994134-68994193	GO:0000209|GO:0042287|GO:0004842|GO:0005794|GO:0002495|GO:0016874|GO:0031410|GO:0005764|GO:0046872|GO:0006955|GO:0016020|GO:0008270|GO:0016021|GO:0005768	NM_175188	Mm.380457
A_66_P132295	Tfpi	Mus musculus tissue factor pathway inhibitor (Tfpi), transcript variant 1, mRNA [NM_011576]	11.7971	up	0.933352	-2.62701	chr2	84273059	-	FALSE	mm|2qD	21788	NM_011576	tissue factor pathway inhibitor	chr2:84273118-84273059	GO:0005886|GO:0007596|GO:0004867|GO:0010466|GO:0007598|GO:0005576|GO:0030414|GO:0005615	NM_011576	Mm.124316
A_55_P1976224	Ckb	Mus musculus creatine kinase, brain (Ckb), mRNA [NM_021273]	12.5844	up	0.517398	-3.13616	chr12	112907787	-	FALSE	mm|12qF1	12709	NM_021273	creatine kinase, brain	chr12:112907846-112907787	GO:0004111|GO:0003824|GO:0005524|GO:0005829|GO:0005739|GO:0016310|GO:0005737|GO:0000166|GO:0030644|GO:0006600|GO:0016301|GO:0016740|GO:0016772	NM_021273	Mm.16831
A_55_P2152437	Mitf	Mus musculus microphthalmia-associated transcription factor (Mitf), transcript variant 1, mRNA [NM_001113198]	6.53047	up	-3.07543	-5.78261	chr6	97968501	+	FALSE	mm|6qD3	17342	NM_001113198	microphthalmia-associated transcription factor	chr6:97968501-97968560	GO:0010468|GO:0003700|GO:0006366|GO:0003705|GO:0005634|GO:0030154|GO:0046849|GO:0042127|GO:0045944|GO:0043010|GO:0016055|GO:0006355|GO:0043066|GO:0030316|GO:0007275|GO:0030318|GO:0042981|GO:0045670|GO:0003677|GO:0006351|GO:0043565|GO:0045165|GO:0003682|GO:0043473|GO:0045893	NM_001113198	Mm.333284
A_55_P2184023	Dnahc7a	Mus musculus adult male hypothalamus cDNA, RIKEN full-length enriched library, clone:A230008D12 product:unclassifiable, full insert sequence. [AK038423]	11.7727	up	-2.55421	-6.11158	chr1	53754891	-	FALSE	mm|1qC1.1	627872	AK038423	dynein, axonemal, heavy chain 7A	chr1:53754950-53754891	GO:0008150|GO:0005929|GO:0003674		Mm.184692
A_55_P2108461	Olfr272	Mus musculus olfactory receptor 272 (Olfr272), mRNA [NM_146839]	9.61949	down	-7.51187	-4.24591	chr4	52923705	-	FALSE	mm|4qB2	258836	NM_146839	olfactory receptor 272	chr4:52923764-52923705	GO:0007608|GO:0007165|GO:0004984|GO:0007186|GO:0004930|GO:0004872|GO:0016021|GO:0004871	NM_146839	Mm.331617
A_51_P259296	Lpl	Mus musculus lipoprotein lipase (Lpl), mRNA [NM_008509]	5.44419	up	0.912682	-1.53204	chr8	71430267	+	FALSE	mm|8qB3.3	16956	NM_008509	lipoprotein lipase	chr8:71430267-71430326	GO:0006629|GO:0005515|GO:0004806|GO:0005886|GO:0042627|GO:0070328|GO:0031225|GO:0003824|GO:0005615|GO:0034361|GO:0019432|GO:0006633|GO:0019433|GO:0008201|GO:0010744|GO:0005102|GO:0005576|GO:0010886|GO:0004465|GO:0016042|GO:0031012|GO:0034372|GO:0016020|GO:0016787|GO:0010890|GO:0017129	NM_008509	Mm.1514
A_55_P2036627	Pydc3	Mus musculus pyrin domain containing 3 (Pydc3), mRNA [NM_001162938]	6.51808	up	-5.16243	-7.86687	chr1	175607824	+	FALSE	mm|1qH3	100033459	NM_001162938	pyrin domain containing 3	chr1:175607824-175607874	GO:0008150|GO:0003674|GO:0005575	NM_001162938	Mm.303377
A_55_P1964108	B230118H07Rik	Mus musculus RIKEN cDNA B230118H07 gene (B230118H07Rik), mRNA [NM_026592]	5.59209	up	-0.004704	-2.48809	chr2	101416170	-	FALSE	mm|2qE2	68170	NM_026592	RIKEN cDNA B230118H07 gene	chr2:101416229-101416170	GO:0008150|GO:0003674|GO:0005575	NM_026592	Mm.31263
A_52_P480351	Loxl2	Mus musculus lysyl oxidase-like 2 (Loxl2), mRNA [NM_033325]	5.17088	up	-2.0899	-4.46031	chr14	70095254	+	FALSE	mm|14qD2	94352	NM_033325	lysyl oxidase-like 2	chr14:70095254-70095313	GO:0016641|GO:0016020|GO:0005507|GO:0016491|GO:0005576|GO:0046872|GO:0055114|GO:0005044	NM_033325	Mm.116714
A_55_P2078123	Rora	Mus musculus RAR-related orphan receptor alpha (Rora), mRNA [NM_013646]	7.18701	up	-4.25663	-7.10203	chr9	69226774	+	FALSE	mm|9qC	19883	NM_013646	RAR-related orphan receptor alpha	chr9:69226774-69226833	GO:0005515|GO:0006355|GO:0003700|GO:0043030|GO:0003707|GO:0005634|GO:0046068|GO:0005575|GO:0003677|GO:0046872|GO:0006351|GO:0006809|GO:0043565|GO:0021702|GO:0045944|GO:0043401|GO:0004872|GO:0008270|GO:0004879|GO:0030522	NM_013646	Mm.427266
A_55_P1973046	Cttnbp2nl	Mus musculus CTTNBP2 N-terminal like (Cttnbp2nl), transcript variant 1, mRNA [NM_030249]	76.6896	up	-1.5303	-7.79126	chr3	104806739	-	FALSE	mm|3qF2.2	80281	NM_030249	CTTNBP2 N-terminal like	chr3:104806798-104806739	GO:0008150|GO:0003674|GO:0015629	NM_030249	Mm.200327
A_51_P161021	Ifit2	Mus musculus interferon-induced protein with tetratricopeptide repeats 2 (Ifit2), mRNA [NM_008332]	5.81192	up	-2.97694	-5.51596	chr19	34650244	+	FALSE	mm|19qC1	15958	NM_008332	interferon-induced protein with tetratricopeptide repeats 2	chr19:34650244-34650303	GO:0032091|GO:0035457|GO:0005488|GO:0009615	NM_008332	Mm.2036
A_55_P1975481	Ptger3	Mus musculus prostaglandin E receptor 3 (subtype EP3) (Ptger3), mRNA [NM_011196]	7.9971	up	-2.31281	-5.31229	chr3	157268044	+	FALSE	mm|3qH4	19218	NM_011196	prostaglandin E receptor 3 (subtype EP3)	chr3:157268044-157268103	GO:0005515|GO:0007165|GO:0007186|GO:0005886|GO:0001660|GO:0015701|GO:0007200|GO:0007188|GO:0004872|GO:0035810|GO:0007204|GO:0004957	NM_011196	Mm.30424
A_51_P344376	Gpr162	Mus musculus G protein-coupled receptor 162 (Gpr162), mRNA [NM_013533]	9.64661	up	0.223095	-3.04693	chr6	124808481	-	FALSE	mm|6qF2	14788	NM_013533	G protein-coupled receptor 162	chr6:124808540-124808481	GO:0008150|GO:0007165|GO:0003674|GO:0016020|GO:0007186|GO:0005886|GO:0004930|GO:0004872|GO:0016021|GO:0005575|GO:0004871	NM_013533	Mm.2514
A_51_P467224	Fbn1	Mus musculus fibrillin 1 (Fbn1), mRNA [NM_007993]	9.66693	up	-3.50589	-6.77895	chr2	125126727	-	FALSE	mm|2qF1	14118	NM_007993	fibrillin 1	chr2:125126786-125126727	GO:0031012|GO:0007507|GO:0005515|GO:0001501|GO:0001822|GO:0005509|GO:0005578|GO:0001527|GO:0005576|GO:0005615|GO:0005604|GO:0005201	NM_007993	Mm.271644
A_55_P2015687	D14Ertd668e	Mus musculus DNA segment, Chr 14, ERATO Doi 668, expressed (D14Ertd668e), mRNA [NM_199015]	8.73878	up	-1.50871	-4.63614	chr14	59967581	-	FALSE	mm|14qC3	219132	NM_199015	DNA segment, Chr 14, ERATO Doi 668, expressed	chr14:59967640-59967581	GO:0008150|GO:0003674|GO:0006355|GO:0008270|GO:0005634|GO:0005575|GO:0046872|GO:0006351	NM_199015	Mm.479285
A_66_P108152	Cbr1	Mus musculus carbonyl reductase 1 (Cbr1), mRNA [NM_007620]	6.27566	up	0.706005	-1.94376	chr16	93610453	+	FALSE	mm|16qC4	12408	NM_007620	carbonyl reductase 1	chr16:93610453-93610512	GO:0005792|GO:0004090|GO:0005886|GO:0017144|GO:0005634|GO:0042376|GO:0047021|GO:0005902|GO:0005737|GO:0050221|GO:0005488|GO:0008152|GO:0016491|GO:0042373|GO:0055114	NM_007620	Mm.26940
A_55_P2002757	Blnk	Mus musculus B-cell linker (Blnk), mRNA [NM_008528]	28.9597	up	-0.277819	-5.13379	chr19	41003426	-	FALSE	mm|19qC3	17060	NM_008528	B-cell linker	chr19:41003485-41003426	GO:0035556|GO:0005622|GO:0005515|GO:0042113|GO:0005737|GO:0016020|GO:0005886|GO:0005070	NM_008528	Mm.9749
A_51_P425962	Khdrbs3	Mus musculus KH domain containing, RNA binding, signal transduction associated 3 (Khdrbs3), mRNA [NM_010158]	8.27203	up	-4.01801	-7.06625	chr15	68923876	+	FALSE	mm|15qD3	13992	NM_010158	KH domain containing, RNA binding, signal transduction associated 3	chr15:68923876-68923935	GO:0006397|GO:0005515|GO:0017124|GO:0006355|GO:0003727|GO:0003723|GO:0005634|GO:0033120|GO:0006351	NM_010158	Mm.17964
A_66_P106808	Scn3a	Mus musculus sodium channel, voltage-gated, type III, alpha (Scn3a), mRNA [NM_018732]	10.5982	up	-0.317513	-3.72327	chr2	65297940	-	FALSE	mm|2qC1.3	20269	NM_018732	sodium channel, voltage-gated, type III, alpha	chr2:65297999-65297940	GO:0030424|GO:0005516|GO:0046684|GO:0005244|GO:0005272|GO:0005248|GO:0005624|GO:0031402|GO:0019233|GO:0019228|GO:0005737|GO:0043025|GO:0006810|GO:0035725|GO:0034765|GO:0001518|GO:0016021|GO:0006814|GO:0005216|GO:0071236|GO:0006811	NM_018732	Mm.330256
A_55_P2126950	Zfp467	Mus musculus zinc finger protein 467 (Zfp467), transcript variant 4, mRNA [NM_001085417]	9.92525	up	-1.73975	-5.05085	chr6	48377799	-	FALSE	mm|6qB2.3	68910	NM_001085417	zinc finger protein 467	chr6:48377858-48377799	GO:0005622|GO:0005515|GO:0006355|GO:0008270|GO:0005634|GO:0003676|GO:0003677|GO:0046872|GO:0006351	NM_001085417	Mm.2464
A_55_P2113498	Klrd1	Mus musculus killer cell lectin-like receptor, subfamily D, member 1 (Klrd1), mRNA [NM_010654]	18.3516	up	1.53113	-2.6667	chr6	129548612	+	FALSE	mm|6qF3	16643	NM_010654	killer cell lectin-like receptor, subfamily D, member 1	chr6:129548612-129548671	GO:0016020|GO:0005886|GO:0005488|GO:0005529|GO:0004872|GO:0016021|GO:0009897	NM_010654	Mm.391515
A_55_P1981455			12.0377	up	-1.80159	-5.39108				FALSE
A_51_P458866	F11r	Mus musculus F11 receptor (F11r), mRNA [NM_172647]	11.7672	up	-4.35374	-7.91044	chr1	173393848	+	FALSE	mm|1qH3	16456	NM_172647	F11 receptor	chr1:173393848-173393907	GO:0005515|GO:0005886|GO:0030855|GO:0005923|GO:0007155	NM_172647	Mm.294882
A_55_P2068874	4930408F14Rik	Mus musculus RIKEN cDNA 4930408F14 gene (4930408F14Rik), mRNA [NM_029106]	10.845	up	-4.13332	-7.57228	chrX	30823754	+	FALSE	mm|XqA3.1	74851	NM_029106	RIKEN cDNA 4930408F14 gene	chrX:30823754-30823813	GO:0008150|GO:0003674|GO:0005575	NM_029106	Mm.431329
A_51_P172853	Cd14	Mus musculus CD14 antigen (Cd14), mRNA [NM_009841]	20.7385	up	-1.61825	-5.99249	chr18	36884969	-	FALSE	mm|18qB2	12475	NM_009841	CD14 antigen	chr18:36885028-36884969	GO:0070891|GO:0005886|GO:0009986|GO:0032760|GO:0002237|GO:0005576|GO:0031225|GO:0050715|GO:0005615|GO:0001530|GO:0071223|GO:0071222|GO:0006954|GO:0016020|GO:0045087|GO:0045121	NM_009841	Mm.3460
A_51_P352381	Dhrs4	Mus musculus dehydrogenase/reductase (SDR family) member 4 (Dhrs4), transcript variant 2, mRNA [NM_030686]	7.7047	up	-0.125482	-3.07122	chr14	56105010	+	FALSE	mm|14qC3	28200	NM_030686	dehydrogenase/reductase (SDR family) member 4	chr14:56105010-56105943	GO:0005739|GO:0031965|GO:0001758|GO:0042574|GO:0016491|GO:0055114|GO:0043231|GO:0005777	NM_030686	Mm.27427
A_51_P504815	Stfa3	Mus musculus stefin A3 (Stfa3), mRNA [NM_025288]	40.0944	up	-0.363483	-5.68881	chr16	36450693	-	FALSE	mm|16qB3	20863	NM_025288	stefin A3	chr16:36450752-36450693	GO:0005622|GO:0005737|GO:0004869|GO:0004866|GO:0010466|GO:0030414	NM_025288	Mm.136573
A_55_P2239317	Afap1l1	Mus musculus actin filament associated protein 1-like 1 (Afap1l1), mRNA [NM_178928]	30.5869	up	-2.17252	-7.10737	chr18	61890650	-	FALSE	mm|18qE1	106877	NM_178928	actin filament associated protein 1-like 1	chr18:61890709-61890650	GO:0005515|GO:0008150|GO:0005575	NM_178928	Mm.26632
A_51_P359272	Alcam	Mus musculus activated leukocyte cell adhesion molecule (Alcam), mRNA [NM_009655]	45.3902	up	-2.45525	-7.95956	chr16	52268908	-	FALSE	mm|16qB5	11658	NM_009655	activated leukocyte cell adhesion molecule	chr16:52270785-52268908	GO:0005515|GO:0030424|GO:0008045|GO:0016020|GO:0007411|GO:0043025|GO:0016021|GO:0007155|GO:0009897	NM_009655	Mm.288282
A_66_P124179	Atp6v0d2	Mus musculus ATPase, H+ transporting, lysosomal V0 subunit D2 (Atp6v0d2), mRNA [NM_175406]	12.0459	up	-2.06349	-5.65397	chr4	19805367	-	FALSE	mm|4qA3	242341	NM_175406	ATPase, H+ transporting, lysosomal V0 subunit D2	chr4:19805426-19805367	GO:0033177|GO:0015078|GO:0033572|GO:0016324|GO:0016020|GO:0006810|GO:0015991|GO:0005769|GO:0010008|GO:0016471|GO:0033179|GO:0005768|GO:0006811|GO:0015992	NM_175406	Mm.19298
A_55_P2167025	Pvrl2	Mus musculus poliovirus receptor-related 2 (Pvrl2), transcript variant 1, mRNA [NM_008990]	15.0216	up	-2.78395	-6.69292	chr7	20302018	-	FALSE	mm|7qA3	19294	NM_008990	poliovirus receptor-related 2	chr7:20302077-20302018	GO:0005515|GO:0001675|GO:0005886|GO:0007289|GO:0007286|GO:0051856|GO:0033005|GO:0030382|GO:0042803|GO:0060370|GO:0005915|GO:0005911|GO:0007010|GO:0042271|GO:0004872|GO:0007155|GO:0050839|GO:0007156|GO:0002891|GO:0043064|GO:0009986|GO:0019064|GO:0032990|GO:0009566|GO:0051654|GO:0016020|GO:0045954|GO:0002860|GO:0016021|GO:0046814	NM_008990	Mm.4341
A_51_P214127	Cpa3	Mus musculus carboxypeptidase A3, mast cell (Cpa3), mRNA [NM_007753]	17.1958	up	-3.81823	-7.92222	chr3	20115674	-	FALSE	mm|3qA2	12873	NM_007753	carboxypeptidase A3, mast cell	chr3:20115733-20115674	GO:0016787|GO:0006508|GO:0004180|GO:0008270|GO:0008233|GO:0031410|GO:0046872|GO:0008237|GO:0004181	NM_007753	Mm.1135
A_55_P1956083	Gpr68	Mus musculus G protein-coupled receptor 68 (Gpr68), transcript variant 1, mRNA [NM_175493]	11.2471	up	-1.42771	-4.91919	chr12	102114895	-	FALSE	mm|12qE	238377	NM_175493	G protein-coupled receptor 68	chr12:102114954-102114895	GO:0007165|GO:0016020|GO:0007186|GO:0005886|GO:0004930|GO:0004872|GO:0016021|GO:0004871	NM_175493	Mm.32160
A_55_P2043171	Lilra6	Mus musculus leukocyte immunoglobulin-like receptor, subfamily A (with TM domain), member 6 (Lilra6), transcript variant 1, mRNA [NM_011090]	11.4036	up	-0.791143	-4.30255	chr7	3864087	-	FALSE	mm|7qA1	18726	NM_011090	leukocyte immunoglobulin-like receptor, subfamily A (with TM domain), member 6	chr7:3864146-3864087	GO:0008150|GO:0003674|GO:0005575	NM_011090	Mm.440989
A_52_P316933	Sh3bgrl2	Mus musculus SH3 domain binding glutamic acid-rich protein like 2 (Sh3bgrl2), mRNA [NM_172507]	11.921	up	-4.23105	-7.80648	chr9	83493811	+	FALSE	mm|9qE2	212531	NM_172507	SH3 domain binding glutamic acid-rich protein like 2	chr9:83493811-83493870	GO:0008150|GO:0003674|GO:0017124|GO:0005634|GO:0005575	NM_172507	Mm.485873
A_52_P487686	BC100530	Mus musculus cDNA sequence BC100530 (BC100530), mRNA [NM_001082546]	334.832	up	1.93527	-6.45202	chr16	36359525	-	FALSE	mm|16qB3	100034684	NM_001082546	cDNA sequence BC100530	chr16:36359584-36359525	GO:0008150|GO:0003674|GO:0005575	NM_001082546	Mm.383561
A_55_P2026139	BC055004	Mus musculus cDNA sequence BC055004 (BC055004), mRNA [NM_001013773]	8.95802	up	-4.70793	-7.87111	chr5	138693044	+	FALSE	mm|5qG2	381680	NM_001013773	cDNA sequence BC055004	chr5:138693044-138693103	GO:0008150|GO:0003674|GO:0005575	NM_001013773	Mm.156846
A_52_P610188	Ncam2	Mus musculus neural cell adhesion molecule 2 (Ncam2), transcript variant 1, mRNA [NM_001113208]	7.25417	down	-7.23537	-4.37656	chr16	81623752	+	FALSE	mm|16qC3.3	17968	NM_001113208	neural cell adhesion molecule 2	chr16:81623752-81623811	GO:0030424|GO:0016020|GO:0005886|GO:0031225|GO:0016021|GO:0007155	NM_001113208	Mm.433941
A_51_P413059	Mcpt8	Mus musculus mast cell protease 8 (Mcpt8), mRNA [NM_008572]	10.3166	up	-4.60682	-7.97372	chr14	56702300	-	FALSE	mm|14qC3	17231	NM_008572	mast cell protease 8	chr14:56702674-56702300	GO:0016787|GO:0004252|GO:0006508|GO:0008236|GO:0008233|GO:0005576|GO:0003824	NM_008572	Mm.41979
A_55_P2098398	Trim30c	PREDICTED: Mus musculus tripartite motif-containing 30-2 (Trim30-2), mRNA [XM_485980]	7.74428	up	-4.54261	-7.49574	chr7	111530579	-	FALSE	mm|7qE3	434219	XM_485980	tripartite motif-containing 30C	chr7:111530638-111530579	GO:0008150|GO:0003674|GO:0005575|GO:0046872	XM_485980	Mm.386948
A_55_P1971963	Tmem176b	Mus musculus transmembrane protein 176B (Tmem176b), transcript variant 1, mRNA [NM_023056]	7.20557	up	2.70545	-0.143661	chr6	48783831	-	FALSE	mm|6qB2.3	65963	NM_023056	transmembrane protein 176B	chr6:48783890-48783831	GO:0016020|GO:0005634|GO:0016021|GO:0030154	NM_023056	Mm.28385
A_51_P291749	Pecr	Mus musculus peroxisomal trans-2-enoyl-CoA reductase (Pecr), mRNA [NM_023523]	10.9515	up	0.045465	-3.40759	chr1	72305839	-	FALSE	mm|1qC3	111175	NM_023523	peroxisomal trans-2-enoyl-CoA reductase	chr1:72305898-72305839	GO:0005739|GO:0008610|GO:0019166|GO:0005488|GO:0008152|GO:0030497|GO:0016491|GO:0006633|GO:0055114|GO:0043231|GO:0005777	NM_023523	Mm.281738
A_51_P272876	Fam46a	Mus musculus family with sequence similarity 46, member A (Fam46a), transcript variant 1, mRNA [NM_001160378]	7.00626	up	-4.29092	-7.09957	chr9	85218249	-	FALSE	mm|9qE3.1	212943	NM_001160378	family with sequence similarity 46, member A	chr9:85218308-85218249	GO:0008150|GO:0003674|GO:0005575	NM_001160378	Mm.74610
A_55_P1969650	Rasgrp1	Mus musculus RAS guanyl releasing protein 1 (Rasgrp1), mRNA [NM_011246]	24.8541	up	-3.34073	-7.97614	chr2	117105803	-	FALSE	mm|2qE5	19419	NM_011246	RAS guanyl releasing protein 1	chr2:117105862-117105803	GO:0051056|GO:0005794|GO:0005886|GO:0005783|GO:0007264|GO:0005509|GO:0030154|GO:0046872|GO:0005085|GO:0005622|GO:0035556|GO:0005737|GO:0016020	NM_011246	Mm.42150
A_55_P1973417		Mus musculus, clone IMAGE:3495001, mRNA. [BC048373]	7.48293	up	-1.72264	-4.62624	chr1	85151779	-	FALSE	mm|1qC5		BC048373		chr1:85151838-85151779			Mm.440912
A_55_P2103698	Isg15	Mus musculus ISG15 ubiquitin-like modifier (Isg15), mRNA [NM_015783]	6.02053	up	1.24645	-1.34344	chr4	155573649	-	FALSE	mm|4qE2	100038882	NM_015783	ISG15 ubiquitin-like modifier	chr4:155573708-155573649	GO:0005515|GO:0005737|GO:0032020|GO:0019941|GO:0031386|GO:0005576|GO:0009615|GO:0005829	NM_015783	Mm.4950
A_51_P185627	Gpc2	Mus musculus glypican 2 (cerebroglycan) (Gpc2), mRNA [NM_172412]	11.937	up	-3.87353	-7.45091	chr5	138715328	-	FALSE	mm|5qG2	71951	NM_172412	glypican 2 (cerebroglycan)	chr5:138715387-138715328	GO:0016020|GO:0005886|GO:0005783|GO:0030182|GO:0005578|GO:0043395|GO:0005576|GO:0031225	NM_172412	Mm.77066
A_52_P71353	Psd3	Mus musculus pleckstrin and Sec7 domain containing 3 (Psd3), transcript variant 1, mRNA [NM_030263]	5.54889	down	-4.56058	-2.08838	chr8	70282033	-	FALSE	mm|8qB3.3	234353	NM_030263	pleckstrin and Sec7 domain containing 3	chr8:70282092-70282033	GO:0030054|GO:0005886|GO:0005624|GO:0045202|GO:0005085|GO:0005622|GO:0005086|GO:0005737|GO:0050790|GO:0016020|GO:0045211|GO:0032012|GO:0032011	NM_030263	Mm.32525
A_55_P2000595			18.425	down	-7.74491	-3.54132	chrX	71945677	+	FALSE	mm|XqA7.3				chrX:071945677-071945736
A_51_P231320	Mmp8	Mus musculus matrix metallopeptidase 8 (Mmp8), mRNA [NM_008611]	19.5889	up	-3.70006	-7.99203	chr9	7568238	+	FALSE	mm|9qA1	17394	NM_008611	matrix metallopeptidase 8	chr9:7568238-7568297	GO:0004252|GO:0005509|GO:0005578|GO:0005576|GO:0005615|GO:0046872|GO:0031012|GO:0016787|GO:0008152|GO:0030574|GO:0006508|GO:0008233|GO:0008270|GO:0004222|GO:0008237	NM_008611	Mm.16415
A_55_P2051414	Axl	Mus musculus AXL receptor tyrosine kinase (Axl), transcript variant 1, mRNA [NM_009465]	10.8384	up	-1.59026	-5.02833	chr7	26542541	-	FALSE	mm|7qA3	26362	NM_009465	AXL receptor tyrosine kinase	chr7:26542600-26542541	GO:0006909|GO:0070301|GO:0060068|GO:0034101|GO:0042698|GO:0007283|GO:0030154|GO:0043524|GO:0006954|GO:0000166|GO:0016301|GO:0031668|GO:0034446|GO:0004872|GO:0001779|GO:0043066|GO:0046982|GO:0043277|GO:0030168|GO:0032720|GO:0006916|GO:0005524|GO:0007165|GO:0016310|GO:0016020|GO:0001974|GO:0043491|GO:0051250|GO:0016021|GO:0021885|GO:0001764|GO:0032940|GO:0016740|GO:0043548|GO:0007167|GO:0032036	NM_009465	Mm.4128
A_55_P2046509	Amot	Mus musculus angiomotin (Amot), mRNA [NM_153319]	33.7732	up	-2.8183	-7.8961	chrX	141881036	-	FALSE	mm|XqF2	27494	NM_153319	angiomotin	chrX:141881095-141881036	GO:0030334|GO:0001725|GO:0030054|GO:0009986|GO:0005884|GO:0030139|GO:0001701|GO:0001726|GO:0030027|GO:0001702|GO:0043536|GO:0007165|GO:0042074|GO:0005737|GO:0006935|GO:0043532|GO:0016525|GO:0040019|GO:0004872|GO:0016021|GO:0005923|GO:0001570|GO:0043116|GO:0009897	NM_153319	Mm.100068
A_55_P2138177	Psd3	Mus musculus pleckstrin and Sec7 domain containing 3 (Psd3), transcript variant 2, mRNA [NM_177698]	6.01712	down	-2.28134	0.307735	chr8	70213703	-	FALSE	mm|8qB3.3	234353	NM_177698	pleckstrin and Sec7 domain containing 3	chr8:70213762-70213703	GO:0030054|GO:0005886|GO:0005624|GO:0045202|GO:0005085|GO:0005622|GO:0005086|GO:0005737|GO:0050790|GO:0016020|GO:0045211|GO:0032012|GO:0032011	NM_177698	Mm.32525
A_55_P2024749	Hspb11	Mus musculus heat shock protein family B (small), member 11 (Hspb11), mRNA [NM_028394]	9.49432	up	1.4645	-1.78257	chr4	106952416	+	FALSE	mm|4qC7	72938	NM_028394	heat shock protein family B (small), member 11	chr4:106952416-106952475	GO:0005929|GO:0030992	NM_028394	Mm.21787
A_55_P2160296	Olfm1	Mus musculus olfactomedin 1 (Olfm1), transcript variant 2, mRNA [NM_001038612]	7.04424	up	-3.75929	-6.57573	chr2	28061483	+	FALSE	mm|2qA3	56177	NM_001038612	olfactomedin 1	chr2:28061483-28061542	GO:0005515|GO:0005783|GO:0007275|GO:0051259|GO:0005615	NM_001038612	Mm.43278
A_55_P2170349	Klra22	Mus musculus killer cell lectin-like receptor subfamily A, member 22 (Klra22), mRNA [NM_053152]	9.10816	up	-3.80808	-6.99524	chr6	129922175	-	FALSE	mm|6qF3	93969	NM_053152	killer cell lectin-like receptor subfamily A, member 22	chr6:129922234-129922175	GO:0008150|GO:0007165|GO:0003674|GO:0005886|GO:0004872	NM_053152	Mm.333431
A_55_P2097279	Lilrb3	Mus musculus leukocyte immunoglobulin-like receptor, subfamily B (with TM and ITIM domains), member 3 (Lilrb3), mRNA [NM_011095]	9.28194	up	2.97321	-0.241216	chr7	3664137	-	FALSE	mm|7qA1	18733	NM_011095	leukocyte immunoglobulin-like receptor, subfamily B (with TM and ITIM domains), member 3	chr7:3664196-3664137	GO:0019724|GO:0001782|GO:0019221|GO:0043011	NM_011095	Mm.440814
A_52_P514407	Klra15	Mus musculus killer cell lectin-like receptor, subfamily A, member 15 (Klra15), mRNA [NM_013793]	5.15613	up	-5.64636	-8.01264				FALSE		27423	NM_013793	killer cell lectin-like receptor, subfamily A, member 15		GO:0007165|GO:0005886|GO:0005529|GO:0004872	NM_013793	Mm.24399
A_55_P2079561	Lilra6	Mus musculus leukocyte immunoglobulin-like receptor, subfamily A (with TM domain), member 6 (Lilra6), transcript variant 1, mRNA [NM_011090]	17.3426	up	2.92276	-1.1935	chr7	3860277	-	FALSE	mm|7qA1	18726	NM_011090	leukocyte immunoglobulin-like receptor, subfamily A (with TM domain), member 6	chr7:3860336-3860277	GO:0008150|GO:0003674|GO:0005575	NM_011090	Mm.440989
A_55_P2115955	Raet1e	Mus musculus retinoic acid early transcript 1E (Raet1e), mRNA [NM_198193]	6.34947	up	-0.994775	-3.66141	chr10	21903525	+	FALSE	mm|10qA3	379043	NM_198193	retinoic acid early transcript 1E	chr10:21903525-21903584	GO:0005515|GO:0005625	NM_198193	Mm.439724
A_51_P229602	Plxna2	Mus musculus plexin A2 (Plxna2), mRNA [NM_008882]	6.6261	up	-3.88566	-6.61382	chr1	196642958	+	FALSE	mm|1qH6	18845	NM_008882	plexin A2	chr1:196642958-196643017	GO:0005622|GO:0021935|GO:0007165|GO:0051642|GO:0017154|GO:0016020|GO:0005886|GO:0007275|GO:0004872|GO:0016021|GO:0007166	NM_008882	Mm.2251
A_51_P108226	1100001G20Rik	Mus musculus RIKEN cDNA 1100001G20 gene (1100001G20Rik), mRNA [NM_183249]	34.728	up	-1.02837	-6.1464	chr11	83566028	+	FALSE	mm|11qC	66107	NM_183249	RIKEN cDNA 1100001G20 gene	chr11:83566028-83566087	GO:0050872|GO:0032496|GO:0034612|GO:0010577|GO:0043085|GO:0005615	NM_183249	Mm.902
A_52_P287692	Stk32c	Mus musculus serine/threonine kinase 32C (Stk32c), transcript variant 1, mRNA [NM_021302]	9.33202	up	-3.88252	-7.10471	chr7	146290247	-	FALSE	mm|7qF4	57740	NM_021302	serine/threonine kinase 32C	chr7:146291203-146290247	GO:0005575|GO:0005524|GO:0046872|GO:0003674|GO:0008150|GO:0016310|GO:0004672|GO:0000166|GO:0004674|GO:0016301|GO:0006468|GO:0016740|GO:0016772	NM_021302	Mm.65336
A_55_P2118173	Igf2	Mus musculus insulin-like growth factor 2 (Igf2), transcript variant 1, mRNA [NM_010514]	5.26627	up	-3.59058	-5.98736	chr7	149839661	-	FALSE	mm|7qF5	16002	NM_010514	insulin-like growth factor 2	chr7:149839720-149839661	GO:0005515|GO:0051897|GO:0014070|GO:0071902|GO:0005159|GO:0005158|GO:0050731|GO:2000273|GO:0005615|GO:0042104|GO:0035558|GO:0045944|GO:0009887|GO:0006006|GO:0090031|GO:0051781|GO:2000467|GO:0045725|GO:0005975|GO:0042493|GO:0046628|GO:0005576|GO:0045840|GO:0043085|GO:0005179|GO:0001503|GO:0030546|GO:0031017|GO:0001934|GO:0043410|GO:0043539|GO:0008083|GO:0051146	NM_010514	Mm.3862
A_55_P1953728	Nes	Mus musculus nestin (Nes), mRNA [NM_016701]	11.6345	up	0.00987959	-3.53045	chr3	87784303	+	FALSE	mm|3qF1	18008	NM_016701	nestin	chr3:87784303-87784362	GO:0005882|GO:0005622|GO:0030844|GO:2000179|GO:0043066|GO:0005737|GO:0005198|GO:0007275|GO:0048858|GO:0045111|GO:0031730|GO:0007399	NM_016701	Mm.331129
A_55_P2155116	Gm5086	Mus musculus adult male corpora quadrigemina cDNA, RIKEN full-length enriched library, clone:B230311A21 product:unclassifiable, full insert sequence. [AK045784]	44.3243	up	-2.55466	-8.02468	chr13	98353890	+	FALSE	mm|13qD1	328314	AK045784	predicted gene 5086	chr13:98353890-98353949	GO:0008150|GO:0003674|GO:0005575		Mm.138047
A_55_P2104975	Serpina3f	Mus musculus serine (or cysteine) peptidase inhibitor, clade A, member 3F (Serpina3f), transcript variant 1, mRNA [NM_001168294]	8.45311	up	-4.40795	-7.48743	chr12	105458989	+	FALSE	mm|12qE	238393	NM_001168294	serine (or cysteine) peptidase inhibitor, clade A, member 3F	chr12:105458989-105459048	GO:0030162|GO:0010951|GO:0004867|GO:0043434|GO:0005576|GO:0034097	NM_001168294	Mm.483584
A_51_P239750	Inhba	Mus musculus inhibin beta-A (Inhba), mRNA [NM_008380]	6.09086	up	-5.30104	-7.90769	chr13	16118634	+	FALSE	mm|13qA1	16323	NM_008380	inhibin beta-A	chr13:16118634-16118693	GO:0042541|GO:0030308|GO:0008285|GO:0042701|GO:0042802|GO:0071372|GO:0001541|GO:0000082|GO:0071397|GO:0002244|GO:0061029|GO:0045944|GO:0042476|GO:0060021|GO:0048184|GO:0007050|GO:0048333|GO:0001942|GO:0043509|GO:0001707|GO:0046982|GO:0006357|GO:0005102|GO:0005576|GO:0046880|GO:0006917|GO:0045786|GO:0005125|GO:0032925|GO:0051799|GO:0005179|GO:0045648|GO:0043512|GO:0045893|GO:0008083|GO:0040007|GO:…	NM_008380	Mm.8042
A_55_P1997569	Nkx6-2	Mus musculus NK6 homeobox 2 (Nkx6-2), transcript variant 1, mRNA [NM_183248]	75.6098	up	-1.17189	-7.41239	chr7	146767119	-	FALSE	mm|7qF4	14912	NM_183248	NK6 homeobox 2	chr7:146767178-146767119	GO:0003700|GO:0010455|GO:0048709|GO:0010454|GO:0022010|GO:0045686|GO:0005634|GO:0045687|GO:0000122|GO:0003677|GO:0030154|GO:0043565|GO:0031018|GO:0050885|GO:0021912|GO:0021913	NM_183248	Mm.476889
A_55_P2238720		START domain containing 9 [Source:MGI Symbol;Acc:MGI:3045258] [ENSMUST00000070420]	6.75128	up	-5.22355	-7.97871	chr2	120539118	+	FALSE	mm|2qE5		AK029732		chr2:120539118-120539177			Mm.389390
A_55_P1954820	D1Ertd622e	Mus musculus DNA segment, Chr 1, ERATO Doi 622, expressed (D1Ertd622e), mRNA [NM_133825]	10.0166	up	0.921094	-2.40322	chr1	99540567	-	FALSE	mm|1qD	52392	NM_133825	DNA segment, Chr 1, ERATO Doi 622, expressed	chr1:99540626-99540567	GO:0008150|GO:0003674|GO:0005575	NM_133825	Mm.12309
A_55_P2007964	Cx3cr1	Mus musculus chemokine (C-X3-C) receptor 1 (Cx3cr1), mRNA [NM_009987]	5.61658	up	1.65074	-0.838953	chr9	119957811	-	FALSE	mm|9qF4	13051	NM_009987	chemokine (C-X3-C) receptor 1	chr9:119957870-119957811	GO:0043005|GO:0048471|GO:0043066|GO:0030336|GO:0004896|GO:0005886|GO:0004930|GO:0019221|GO:0045766|GO:0032809|GO:0007165|GO:0021795|GO:0007186|GO:0016020|GO:0016495|GO:0016525|GO:0004950|GO:0002282|GO:0004872|GO:0048246|GO:0004871|GO:0016021	NM_009987	Mm.44065
A_55_P2027737	Il1rl1	Mus musculus interleukin 1 receptor-like 1 (Il1rl1), transcript variant 1, mRNA [NM_001025602]	5.42171	up	-3.15629	-5.59503	chr1	40522187	+	FALSE	mm|1qB	17082	NM_001025602	interleukin 1 receptor-like 1	chr1:40522187-40522246	GO:0005515|GO:0032754|GO:0005886|GO:0009986|GO:0043032|GO:0019221|GO:0031224|GO:0002113|GO:0005576|GO:0005615|GO:0007165|GO:0002114|GO:0016020|GO:0045087|GO:0050729|GO:0002826|GO:0004908|GO:0004872|GO:0016021|GO:0032689|GO:0009897|GO:0090197|GO:0043124|GO:0004888	NM_001025602	Mm.289824
A_55_P2048937	Kif5c	Mus musculus kinesin family member 5C (Kif5c), mRNA [NM_008449]	10.2649	up	-4.67438	-8.03403	chr2	49630228	+	FALSE	mm|2qC1.1	16574	NM_008449	kinesin family member 5C	chr2:49630228-49630287	GO:0005515|GO:0043005|GO:0008045|GO:0005871|GO:0005737|GO:0000166|GO:0035253|GO:0034190|GO:0008152|GO:0005874|GO:0003777|GO:0005524	NM_008449	Mm.256342
A_51_P108978	Myadm	Mus musculus myeloid-associated differentiation marker (Myadm), transcript variant 4, mRNA [NM_016969]	6.91614	up	-1.87646	-4.66643	chr7	3298433	+	FALSE	mm|7qA1	50918	NM_016969	myeloid-associated differentiation marker	chr7:3298433-3298492	GO:0016020|GO:0016021	NM_016969	Mm.29874
A_51_P464710	Adap2	Mus musculus ArfGAP with dual PH domains 2 (Adap2), mRNA [NM_172133]	8.95249	up	-4.57594	-7.73822	chr11	79991925	+	FALSE	mm|11qB5	216991	NM_172133	ArfGAP with dual PH domains 2	chr11:79991925-79991984	GO:0005886|GO:0043325|GO:0005547|GO:0005546|GO:0005624|GO:0005740|GO:0046872|GO:0005829|GO:0007507|GO:0005545|GO:0008060|GO:0043533|GO:0005737|GO:0016020|GO:0032312|GO:0008270|GO:0048017|GO:0005096	NM_172133	Mm.341520
A_55_P2011794			10.3228	up	0.451803	-2.91596				FALSE
A_55_P2013475	Tcam1	Mus musculus testicular cell adhesion molecule 1 (Tcam1), mRNA [NM_029467]	8.85726	up	-3.61816	-6.76502	chr11	106149392	+	FALSE	mm|11qE1	75870	NM_029467	testicular cell adhesion molecule 1	chr11:106149392-106149451	GO:0003674|GO:0016337|GO:0005887	NM_029467	Mm.159608
A_52_P1093529	Pik3r5	Mus musculus phosphoinositide-3-kinase, regulatory subunit 5, p101 (Pik3r5), mRNA [NM_177320]	5.54774	up	-0.286951	-2.75885	chr11	68310906	+	FALSE	mm|11qB3	320207	NM_177320	phosphoinositide-3-kinase, regulatory subunit 5, p101	chr11:68310906-68310963	GO:0016310|GO:0005737|GO:0046935|GO:0016020|GO:0043551|GO:0016301|GO:0005634|GO:0005942|GO:0005829	NM_177320	Mm.244960
A_66_P105046	Il18	Mus musculus interleukin 18 (Il18), mRNA [NM_008360]	18.5962	up	-0.472748	-4.68968	chr9	50389761	+	FALSE	mm|9qA5.3	16173	NM_008360	interleukin 18	chr9:50389761-50389820	GO:0008625|GO:0042088|GO:0032819|GO:0030155|GO:0005615|GO:0032757|GO:0042104|GO:0016324|GO:0006955|GO:0005737|GO:0043525|GO:0060312|GO:0071375|GO:0042095|GO:0050966|GO:0032930|GO:0032729|GO:0001666|GO:0032740|GO:0032725|GO:0032760|GO:0030431|GO:0005576|GO:0042231|GO:0032722|GO:0001525|GO:0005125|GO:2000256|GO:0032967|GO:0051142|GO:0043117	NM_008360	Mm.1410
A_51_P186476	Slc11a1	Mus musculus solute carrier family 11 (proton-coupled divalent metal ion transporters), member 1 (Slc11a1), mRNA [NM_013612]	14.2724	up	-1.80183	-5.63699	chr1	74432161	+	FALSE	mm|1qC3	18173	NM_013612	solute carrier family 11 (proton-coupled divalent metal ion transporters), member 1	chr1:74432161-74432220	GO:0006909|GO:0046915|GO:0001818|GO:0001819|GO:0005764|GO:0042803|GO:0006879|GO:0007035|GO:0000165|GO:0070574|GO:0030670|GO:0032496|GO:0048255|GO:0042742|GO:0000060|GO:0032729|GO:0002369|GO:0009986|GO:0042832|GO:0060586|GO:0015707|GO:0042116|GO:0042060|GO:0009279|GO:0032632|GO:0071421|GO:0010008|GO:0045730|GO:0043091|GO:0005886|GO:0048002|GO:0055072|GO:0032147|GO:0009617|GO:0050766|GO:0006954|GO:…	NM_013612	Mm.2913
A_51_P363400	Prg2	Mus musculus proteoglycan 2, bone marrow (Prg2), mRNA [NM_008920]	29.0335	up	-3.18217	-8.04182	chr2	84822799	+	FALSE	mm|2qD	19074	NM_008920	proteoglycan 2, bone marrow	chr2:84822799-84822858	GO:0006955|GO:0005488|GO:0005529|GO:0042742	NM_008920	Mm.142727
A_55_P2035315	Rasgef1b	Mus musculus RasGEF domain family, member 1B (Rasgef1b), transcript variant 1, mRNA [NM_145839]	43.4271	up	1.0103	-4.43022	chr5	99646448	-	FALSE	mm|5qE3	320292	NM_145839	RasGEF domain family, member 1B	chr5:99646507-99646448	GO:0005622|GO:0005085|GO:0051056|GO:0007264|GO:0005575|GO:0005088	NM_145839	Mm.259074
A_55_P2196452	9430069I07Rik	PREDICTED: Mus musculus RIKEN cDNA 9430069I07 gene (9430069I07Rik), miscRNA [XR_105670]	5.16882	up	-5.59909	-7.96892	chr15	34278808	-	FALSE	mm|15qB3.1	77358	XR_105670	RIKEN cDNA 9430069I07 gene	chr15:34278867-34278808	GO:0008150|GO:0003674|GO:0005575	XR_105670	Mm.402759
A_51_P333274	Gzmb	Mus musculus granzyme B (Gzmb), mRNA [NM_013542]	8.39196	up	-3.584	-6.65301	chr14	56877916	-	FALSE	mm|14qC3	14939	NM_013542	granzyme B	chr14:56877975-56877916	GO:0005515|GO:0004252|GO:0006915|GO:0006917|GO:0003824|GO:0043231|GO:0005829|GO:0006922|GO:0005737|GO:0016787|GO:0001913|GO:0019835|GO:0008152|GO:0006508|GO:0008236|GO:0008233|GO:0008626	NM_013542	Mm.14874
A_55_P2104327	Pxdn	Mus musculus peroxidasin homolog (Drosophila) (Pxdn), mRNA [NM_181395]	6.26314	up	-0.955225	-3.60211	chr12	30702457	+	FALSE	mm|12qA2	69675	NM_181395	peroxidasin homolog (Drosophila)	chr12:30702457-30702516	GO:0005783|GO:0005578|GO:0005576|GO:0005615|GO:0046872|GO:0031012|GO:0004601|GO:0030198|GO:0016491|GO:0042744|GO:0006979|GO:0055114|GO:0005201|GO:0020037	NM_181395	Mm.251774
A_51_P466288	Frmd5	Mus musculus FERM domain containing 5 (Frmd5), mRNA [NM_172673]	15.0006	down	-3.19782	0.709136	chr2	121371376	-	FALSE	mm|2qE5	228564	NM_172673	FERM domain containing 5	chr2:121371435-121371376	GO:0008092|GO:0008150|GO:0003674|GO:0005737|GO:0005488|GO:0005575|GO:0005856|GO:0019898	NM_172673	Mm.121514
A_55_P2006494	Apol10b	Mus musculus apolipoprotein L 10b (Apol10b), mRNA [NM_177820]	5.86251	up	-4.75884	-7.31036	chr15	77414593	-	FALSE	mm|15qE1	328561	NM_177820	apolipoprotein L 10b	chr15:77414652-77414593	GO:0008150|GO:0003674|GO:0005575	NM_177820	Mm.379486
A_55_P1982454	Eps8	Mus musculus epidermal growth factor receptor pathway substrate 8 (Eps8), mRNA [NM_007945]	16.3516	up	-1.65474	-5.6861	chr6	137426698	-	FALSE	mm|6qG1	13860	NM_007945	epidermal growth factor receptor pathway substrate 8	chr6:137426757-137426698	GO:0008344|GO:0031532|GO:0048149|GO:0017146|GO:0014069|GO:0019717	NM_007945	Mm.235346
A_51_P505617	Il18r1	Mus musculus interleukin 18 receptor 1 (Il18r1), transcript variant 1, mRNA [NM_008365]	7.60321	down	-1.10429	1.82232	chr1	40557541	+	FALSE	mm|1qB	16182	NM_008365	interleukin 18 receptor 1	chr1:40557541-40557600	GO:0007165|GO:0016020|GO:0045087|GO:0031224|GO:0004872|GO:0016021|GO:0004888	NM_008365	Mm.253664
A_55_P2085974	Igf1	Mus musculus insulin-like growth factor 1 (Igf1), transcript variant 1, mRNA [NM_010512]	5.65194	down	-1.61909	0.879653	chr10	87399581	+	FALSE	mm|10qC1	16000	NM_010512	insulin-like growth factor 1	chr10:87399581-87399640	GO:0005515|GO:0005159|GO:0030307|GO:0005158|GO:0046579|GO:0030879|GO:0005614|GO:0005615|GO:0030104|GO:0046326|GO:0042127|GO:0007613|GO:0045445|GO:0014834|GO:0045821|GO:0005496|GO:0050679|GO:0048286|GO:0045740|GO:0045840|GO:0014068|GO:0014904|GO:0030166|GO:0005178|GO:0005179|GO:0045600|GO:0010001|GO:0045893|GO:0043539|GO:0008083|GO:0035630|GO:0008284|GO:0008285|GO:0030324|GO:0032878|GO:0021940|GO:…	NM_010512	Mm.268521
A_55_P2065562	Aldh3a1	Mus musculus aldehyde dehydrogenase family 3, subfamily A1 (Aldh3a1), transcript variant 1, mRNA [NM_007436]	5.56568	up	-1.2029	-3.67946	chr11	61031864	+	FALSE	mm|11qB2	11670	NM_007436	aldehyde dehydrogenase family 3, subfamily A1	chr11:61031864-61031920	GO:0001666|GO:0014070|GO:0008284|GO:0005783|GO:0042493|GO:0004029|GO:0006081|GO:0004028|GO:0051384|GO:0051591|GO:0005829|GO:0005737|GO:0008106|GO:0016491|GO:0055114	NM_007436	Mm.4257
A_55_P2033362	Egr2	Mus musculus early growth response 2 (Egr2), mRNA [NM_010118]	8.19784	up	-2.18133	-5.21657	chr10	67004798	+	FALSE	mm|10qB5.1	13654	NM_010118	early growth response 2	chr10:67004798-67004857	GO:0005515|GO:0003700|GO:0044212|GO:0006366|GO:0005634|GO:0046872|GO:0005622|GO:0014037|GO:0005737|GO:0021660|GO:0030278|GO:0045944|GO:0035284|GO:0006611|GO:0045444|GO:0031625|GO:0001102|GO:0032868|GO:0006355|GO:0042552|GO:0021569|GO:0003676|GO:0003677|GO:0006351|GO:0021666|GO:0008045|GO:0003682|GO:0007622|GO:0008270|GO:0045893|GO:0021612	NM_010118	Mm.290421
A_51_P364485	Tnfaip2	Mus musculus tumor necrosis factor, alpha-induced protein 2 (Tnfaip2), mRNA [NM_009396]	16.495	up	-0.661405	-4.70536	chr12	112692959	+	FALSE	mm|12qF1	21928	NM_009396	tumor necrosis factor, alpha-induced protein 2	chr12:112692959-112693018	GO:0007275|GO:0001525|GO:0030154	NM_009396	Mm.255332
A_52_P168567	Cebpa	Mus musculus CCAAT/enhancer binding protein (C/EBP), alpha (Cebpa), mRNA [NM_007678]	5.86283	up	-1.17236	-3.72396	chr7	35906517	+	FALSE	mm|7qB1	12606	NM_007678	CCAAT/enhancer binding protein (C/EBP), alpha	chr7:35906517-35906576	GO:0005515|GO:0003700|GO:0008285|GO:0044212|GO:0030324|GO:0003705|GO:0019221|GO:0005634|GO:0032403|GO:0042803|GO:0016363|GO:0045944|GO:0042127|GO:0045945|GO:0035189|GO:0046983|GO:0045444|GO:0030099|GO:0030225|GO:0048469|GO:0008203|GO:0071285|GO:0005667|GO:0006355|GO:0046982|GO:0006357|GO:0019904|GO:0001892|GO:0000122|GO:0003677|GO:0006351|GO:0045669|GO:0043565|GO:0001889|GO:0043234|GO:0071407|GO:…	NM_007678	Mm.349667
A_55_P1992530	Clec4b1	Mus musculus C-type lectin domain family 4, member b1 (Clec4b1), transcript variant 1, mRNA [NM_001190310]	13.0394	up	-4.2167	-7.9215	chr6	123015995	+	FALSE	mm|6qF2	69810	NM_001190310	C-type lectin domain family 4, member b1	chr6:123015995-123016054	GO:0005529|GO:0004872	NM_001190310	Mm.333374
A_55_P1955305	Sirpb1a	Mus musculus signal-regulatory protein beta 1A (Sirpb1a), transcript variant 3, mRNA [NM_001002898]	8.06405	up	-4.48589	-7.49739	chr3	15410412	-	FALSE	mm|3qA1	320832	NM_001002898	signal-regulatory protein beta 1A	chr3:15410471-15410412	GO:0035556|GO:0003674|GO:0050766|GO:0005886	NM_001002898	Mm.425126
A_55_P2027278	Gas2l1	Mus musculus growth arrest-specific 2 like 1 (Gas2l1), transcript variant beta, mRNA [NM_144560]	7.29944	up	-0.670094	-3.53788	chr11	4960384	-	FALSE	mm|11qA1	78926	NM_144560	growth arrest-specific 2 like 1	chr11:4960443-4960384	GO:0008150|GO:0003674|GO:0005737|GO:0007050|GO:0005575|GO:0005856	NM_144560	Mm.44591
A_55_P2016462	Cxcl10	Mus musculus chemokine (C-X-C motif) ligand 10 (Cxcl10), mRNA [NM_021274]	10.1093	up	-1.22523	-4.56285	chr5	92775781	-	FALSE	mm|5qE2	15945	NM_021274	chemokine (C-X-C motif) ligand 10	chr5:92775840-92775781	GO:0008009|GO:0008284|GO:0030335|GO:0009306|GO:0005576|GO:0005125|GO:0005615|GO:0002690|GO:0007165|GO:0051607|GO:0006955|GO:0006954|GO:0006935|GO:0016525|GO:0009897	NM_021274	Mm.877
A_55_P2124153	Rusc2	Mus musculus RUN and SH3 domain containing 2 (Rusc2), transcript variant 2, mRNA [NM_001037709]	10.2335	up	-3.8584	-7.21362	chr4	43439862	+	FALSE	mm|4qA5	100213	NM_001037709	RUN and SH3 domain containing 2	chr4:43439862-43439921	GO:0008150|GO:0003674|GO:0005575	NM_001037709	Mm.235730
A_51_P340170	Il20ra	Mus musculus interleukin 20 receptor, alpha (Il20ra), mRNA [NM_172786]	9.21012	up	-3.8813	-7.08452	chr10	19479702	+	FALSE	mm|10qA3	237313	NM_172786	interleukin 20 receptor, alpha	chr10:19479702-19479761	GO:0008150|GO:0003674|GO:0016020|GO:0004872|GO:0016021|GO:0005575	NM_172786	Mm.234667
A_55_P2066578	Ifi204	Mus musculus interferon activated gene 204, mRNA (cDNA clone MGC:18551 IMAGE:4018506), complete cds. [BC010546]	111.141	up	-1.02341	-7.81965	chr1	175677552	-	FALSE	mm|1qH3	15951	BC010546	interferon activated gene 204	chr1:175677611-175677552	GO:0003712|GO:0005515|GO:0006357|GO:0035458|GO:0005730|GO:0005634|GO:0045669|GO:0042771|GO:0005737|GO:0003690|GO:0016607|GO:0005654|GO:0030224|GO:0045892		Mm.261270
A_55_P1954221	Emp1	Mus musculus epithelial membrane protein 1 (Emp1), mRNA [NM_010128]	21.1179	up	2.41235	-1.98805	chr6	135333061	+	FALSE	mm|6qG1	13730	NM_010128	epithelial membrane protein 1	chr6:135333061-135333120	GO:0016020|GO:0005886|GO:0016049|GO:0016021	NM_010128	Mm.182785
A_55_P2107192			14.0564	up	2.77673	-1.03643	chr4	121757398	+	FALSE	mm|4qD2.2				chr4:121757398-121757457
A_55_P2056325	Anxa3	Mus musculus annexin A3 (Anxa3), mRNA [NM_013470]	26.8158	up	-1.46615	-6.21117	chr5	97253925	+	FALSE	mm|5qE3	11745	NM_013470	annexin A3	chr5:97253925-97253984	GO:0006909|GO:0030424|GO:0004859|GO:0051054|GO:0005886|GO:0043312|GO:0005509|GO:0042581|GO:0019834|GO:0043086|GO:0045766|GO:0030425|GO:0005544|GO:0010595|GO:0051091|GO:0005737|GO:0016020|GO:0043025|GO:0030670|GO:0042742	NM_013470	Mm.7214
A_55_P2156638	Gpr114	Mus musculus G protein-coupled receptor 114 (Gpr114), transcript variant 1, mRNA [NM_001145972]	5.83121	up	0.0858321	-2.45796	chr8	97467119	+	FALSE	mm|8qD1	382045	NM_001145972	G protein-coupled receptor 114	chr8:97467119-97467178	GO:0005886|GO:0004930|GO:0005575|GO:0003674|GO:0007165|GO:0008150|GO:0007186|GO:0016020|GO:0007218|GO:0004872|GO:0016021|GO:0004871|GO:0007166|GO:0004888	NM_001145972	Mm.334726
A_55_P2095909	Lamtor3	Mus musculus late endosomal/lysosomal adaptor, MAPK and MTOR activator 3 (Lamtor3), mRNA [NM_019920]	7.05893	down	-0.677458	2.14199	chr3	137590925	+	FALSE	mm|3qG3	56692	NM_019920	late endosomal/lysosomal adaptor, MAPK and MTOR activator 3	chr3:137590925-137590984	GO:0071986|GO:0019209|GO:0000186|GO:0032008|GO:0071230|GO:0005770|GO:0034613|GO:0042327	NM_019920	Mm.331392
A_55_P2124586	Xlr4a	Mus musculus X-linked lymphocyte-regulated 4A (Xlr4a), mRNA [NM_001081642]	13.4344	down	-3.68782	0.06004	chrX	70319816	-	FALSE	mm|XqA7.3	434794	NM_001081642	X-linked lymphocyte-regulated 4A	chrX:70319875-70319816	GO:0008150|GO:0003674|GO:0005575	NM_001081642	Mm.104764
A_55_P2136817	Coro2b	Mus musculus coronin, actin binding protein, 2B (Coro2b), mRNA [NM_175484]	7.42557	up	-2.60914	-5.50164	chr9	62267306	-	FALSE	mm|9qB	235431	NM_175484	coronin, actin binding protein, 2B	chr9:62267365-62267306	GO:0005737|GO:0051015|GO:0030036|GO:0003779|GO:0015629|GO:0005856	NM_175484	Mm.335229
A_51_P265495	Ly6a	Mus musculus lymphocyte antigen 6 complex, locus A (Ly6a), mRNA [NM_010738]	8.41718	up	1.4936	-1.57973	chr15	74825553	-	FALSE	mm|15qD3	110454	NM_010738	lymphocyte antigen 6 complex, locus A	chr15:74825612-74825553	GO:0005622|GO:0016020|GO:0005886|GO:0031225|GO:0009897	NM_010738	Mm.425949
A_55_P2119377	Klri2	Mus musculus killer cell lectin-like receptor family I member 2 (Klri2), mRNA [NM_177155]	37.3029	up	-2.35152	-7.57274	chr6	129679136	-	FALSE	mm|6qF3	320407	NM_177155	killer cell lectin-like receptor family I member 2	chr6:129679195-129679136	GO:0008150|GO:0003674|GO:0005887|GO:0005529|GO:0004872	NM_177155	Mm.123265
A_55_P2004213	Gprasp2	Mus musculus G protein-coupled receptor associated sorting protein 2 (Gprasp2), transcript variant 1, mRNA [NM_001163015]	5.07689	up	-5.6476	-7.99155	chrX	132379206	+	FALSE	mm|XqF1	245607	NM_001163015	G protein-coupled receptor associated sorting protein 2	chrX:132379206-132379265	GO:0008150|GO:0005737|GO:0001664|GO:0001540|GO:0005488|GO:0005634	NM_001163015	Mm.456004
A_55_P2079579	Pira7	Mus musculus paired-Ig-like receptor A7 (Pira7), mRNA [NM_011094]	16.4237	up	2.26296	-1.77475	chr7	3789721	-	FALSE	mm|7qA1	18730	NM_011094	paired-Ig-like receptor A7	chr7:3789780-3789721	GO:0008150|GO:0003674|GO:0005575	NM_011094	Mm.482470
A_55_P2105371	Dlk1	Mus musculus delta-like 1 homolog (Drosophila) (Dlk1), transcript variant 1, mRNA [NM_010052]	11.77	up	-2.85172	-6.40877	chr12	110698502	+	FALSE	mm|12qF1	13386	NM_010052	delta-like 1 homolog (Drosophila)	chr12:110698502-110698561	GO:0005515|GO:0016020|GO:0005509|GO:0048706|GO:0016021|GO:0009790|GO:0009791|GO:0030154|GO:0009897	NM_010052	Mm.157069
A_55_P2096762	Arhgdig	Mus musculus Rho GDP dissociation inhibitor (GDI) gamma (Arhgdig), mRNA [NM_008113]	9.89743	up	-2.98715	-6.2942	chr17	26336358	-	FALSE	mm|17qA3.3	14570	NM_008113	Rho GDP dissociation inhibitor (GDI) gamma	chr17:26336417-26336358	GO:0032880|GO:0005515|GO:0050790|GO:0005737|GO:0005083|GO:0005624|GO:0005092|GO:0005094|GO:0005096	NM_008113	Mm.1383
A_51_P452629	Tlr2	Mus musculus toll-like receptor 2 (Tlr2), mRNA [NM_011905]	11.0645	up	0.67759	-2.79028	chr3	83640344	-	FALSE	mm|3qE3	24088	NM_011905	toll-like receptor 2	chr3:83640403-83640344	GO:0005515|GO:0032755|GO:0034123|GO:0050830|GO:0031224|GO:0032757|GO:0002221|GO:0042497|GO:0002752|GO:0042498|GO:0002755|GO:0042495|GO:0042496|GO:0044130|GO:0042742|GO:0032728|GO:0046982|GO:0009986|GO:0032760|GO:0042535|GO:0042834|GO:0032722|GO:0002224|GO:0052033|GO:0045087|GO:0009897|GO:0008329|GO:0004888|GO:0042346|GO:0005886|GO:0030177|GO:0002238|GO:0032735|GO:0045429|GO:0009617|GO:0006955|GO:…	NM_011905	Mm.87596
A_52_P188678	Pvrl2	Mus musculus poliovirus receptor-related 2 (Pvrl2), transcript variant 2, mRNA [NM_001159724]	7.31262	up	-2.79397	-5.66436	chr7	20309866	-	FALSE	mm|7qA3	19294	NM_001159724	poliovirus receptor-related 2	chr7:20309924-20309866	GO:0005515|GO:0001675|GO:0005886|GO:0007289|GO:0007286|GO:0051856|GO:0033005|GO:0030382|GO:0042803|GO:0060370|GO:0005915|GO:0005911|GO:0007010|GO:0042271|GO:0004872|GO:0007155|GO:0050839|GO:0007156|GO:0002891|GO:0043064|GO:0009986|GO:0019064|GO:0032990|GO:0009566|GO:0051654|GO:0016020|GO:0045954|GO:0002860|GO:0016021|GO:0046814	NM_001159724	Mm.4341
A_55_P1990839	LOC100042435	PREDICTED: Mus musculus y-linked testis-specific protein 1-like (LOC100042435), mRNA [XM_001477675]	7.87603	up	-4.55308	-7.53055	chrY_random	49904751	-	FALSE		100042435	XM_001477675	y-linked testis-specific protein 1-like	chrY_random:49904810-49904751		XM_001477675
A_55_P2116385	Gpr183	Mus musculus G protein-coupled receptor 183 (Gpr183), mRNA [NM_183031]	22.4883	up	-1.41354	-5.90465	chr14	122351881	-	FALSE	mm|14qE5	321019	NM_183031	G protein-coupled receptor 183	chr14:122351940-122351881	GO:0007165|GO:0016020|GO:0007186|GO:0005886|GO:0045028|GO:0004930|GO:0006959|GO:0004872|GO:0035589|GO:0016021|GO:0004871|GO:0002313	NM_183031	Mm.265618
A_55_P2095360	Tfpi	Mus musculus tissue factor pathway inhibitor (Tfpi), transcript variant 1, mRNA [NM_011576]	8.87507	up	-0.675433	-3.82519	chr2	84284179	-	FALSE	mm|2qD	21788	NM_011576	tissue factor pathway inhibitor	chr2:84284238-84284179	GO:0005886|GO:0007596|GO:0004867|GO:0010466|GO:0007598|GO:0005576|GO:0030414|GO:0005615	NM_011576	Mm.124316
A_66_P135941	D330028D13Rik	Mus musculus RIKEN cDNA D330028D13 gene (D330028D13Rik), transcript variant 1, mRNA [NM_172727]	7.45078	up	-4.31682	-7.21422	chr6	49335421	+	FALSE	mm|6qB2.3	231946	NM_172727	RIKEN cDNA D330028D13 gene	chr6:49335421-49338841	GO:0008150|GO:0003674|GO:0005575	NM_172727	Mm.35199
A_51_P136294	Ms4a4b	Mus musculus membrane-spanning 4-domains, subfamily A, member 4B (Ms4a4b), mRNA [NM_021718]	39.1708	up	-2.61431	-7.90602	chr19	11537629	+	FALSE	mm|19qA	60361	NM_021718	membrane-spanning 4-domains, subfamily A, member 4B	chr19:11537629-11537688	GO:0005887	NM_021718	Mm.33957
A_55_P2024993	Hoxb4	Mus musculus homeobox B4 (Hoxb4), mRNA [NM_010459]	14.8906	up	-3.024	-6.92033	chr11	96182885	+	FALSE	mm|11qD	15412	NM_010459	homeobox B4	chr11:96182885-96182944	GO:0030097|GO:0048103|GO:0006355|GO:0003700|GO:0002011|GO:0008283|GO:0048705|GO:0060216|GO:0048704|GO:0005634|GO:0007275|GO:0048539|GO:0000122|GO:0048536|GO:0009952|GO:0003677|GO:0006351|GO:0043565	NM_010459	Mm.3546
A_51_P253984	Pcp4	Mus musculus Purkinje cell protein 4 (Pcp4), mRNA [NM_008791]	6.5984	up	-2.98252	-5.70463	chr16	96747241	+	FALSE	mm|16qC4	18546	NM_008791	Purkinje cell protein 4	chr16:96747241-96747300	GO:0005634|GO:0005829	NM_008791	Mm.5023
A_51_P247249	Alox5	Mus musculus arachidonate 5-lipoxygenase (Alox5), mRNA [NM_009662]	6.04755	up	-4.64776	-7.24411	chr6	116360326	-	FALSE	mm|6qE3	11689	NM_009662	arachidonate 5-lipoxygenase	chr6:116360385-116360326	GO:0019369|GO:0005634|GO:0005635|GO:0006691|GO:0016363|GO:0030425|GO:0046872|GO:0005829|GO:0005737|GO:0006954|GO:0002540|GO:0045907|GO:0005641|GO:0019370|GO:0002526|GO:0031965|GO:0005506|GO:0019372|GO:0005625|GO:0019233|GO:0042383|GO:0004051|GO:0016491|GO:0016702|GO:0055114	NM_009662	Mm.41072
A_55_P1975492	LOC100041223	Mus musculus spermiogenesis specific transcript on the Y 2-like (LOC100041223), mRNA [NM_001160141]	7.41169	up	-4.93022	-7.82003	chrY_random	32060941	+	FALSE		100041223	NM_001160141	spermiogenesis specific transcript on the Y 2-like	chrY_random:32060941-32061000		NM_001160141	Mm.458582
A_55_P2062757	Mag	Mus musculus myelin-associated glycoprotein (Mag), mRNA [NM_010758]	7.635	down	-4.44696	-1.51433	chr7	31684202	-	FALSE	mm|7qB1	17136	NM_010758	myelin-associated glycoprotein	chr7:31684261-31684202	GO:0043220|GO:0016020|GO:0005886|GO:0043209|GO:0005529|GO:0033270|GO:0050771|GO:0016021|GO:0007155|GO:0050770	NM_010758	Mm.241355
A_51_P181517	Fcgr4	Mus musculus Fc receptor, IgG, low affinity IV (Fcgr4), mRNA [NM_144559]	7.89463	up	-2.79421	-5.77508	chr1	172959738	+	FALSE	mm|1qH3	246256	NM_144559	Fc receptor, IgG, low affinity IV	chr1:172959738-172959797	GO:0005886|GO:0001866	NM_144559	Mm.251254
A_51_P465350	Ly86	Mus musculus lymphocyte antigen 86 (Ly86), mRNA [NM_010745]	53.8537	up	1.20246	-4.54851	chr13	37510701	+	FALSE	mm|13qA3.3	17084	NM_010745	lymphocyte antigen 86	chr13:37510701-37510760	GO:0005515|GO:0006954|GO:0045087|GO:0005576	NM_010745	Mm.2639
A_66_P124806	Tlr4	Mus musculus toll-like receptor 4 (Tlr4), mRNA [NM_021297]	6.18642	up	-3.80426	-6.43336	chr4	66503470	+	FALSE	mm|4qC1	21898	NM_021297	toll-like receptor 4	chr4:66503470-66503529	GO:0005515|GO:0032755|GO:0032715|GO:0031224|GO:0002218|GO:0032757|GO:0045348|GO:0002756|GO:0002758|GO:0002755|GO:0010572|GO:0032496|GO:0032497|GO:0043123|GO:0032609|GO:0006979|GO:0031663|GO:0032689|GO:0042742|GO:0032729|GO:0032728|GO:0009986|GO:0032760|GO:0032727|GO:0042535|GO:0032720|GO:0032722|GO:0002224|GO:0045359|GO:0045084|GO:0042116|GO:0005887|GO:0045087|GO:0043388|GO:0045121|GO:0009897|GO:…	NM_021297	Mm.38049
A_51_P359570	Ifit3	Mus musculus interferon-induced protein with tetratricopeptide repeats 3 (Ifit3), mRNA [NM_010501]	29.9495	up	-1.43249	-6.33696	chr19	34663105	+	FALSE	mm|19qC1	15959	NM_010501	interferon-induced protein with tetratricopeptide repeats 3	chr19:34663105-34663164	GO:0005515|GO:0035458|GO:0005488	NM_010501	Mm.426079
A_66_P116635	Igf2as	Mus musculus insulin-like growth factor 2, antisense (Igf2as), antisense RNA [NR_002855]	11.7185	up	-3.47849	-7.02921	chr7	149856156	+	FALSE	mm|7qF5	111975	NR_002855	insulin-like growth factor 2, antisense	chr7:149856156-149856215		NR_002855	Mm.440180
A_51_P341108	Spint1	Mus musculus serine protease inhibitor, Kunitz type 1 (Spint1), mRNA [NM_016907]	12.1348	up	-4.46397	-8.06505	chr2	119074929	+	FALSE	mm|2qE5	20732	NM_016907	serine protease inhibitor, Kunitz type 1	chr2:119074929-119074988	GO:0060674|GO:0030198|GO:0060670|GO:0001892|GO:0008233	NM_016907	Mm.104955
A_55_P1966731	Ifi203	Mus musculus interferon activated gene 203 (Ifi203), transcript variant 1, mRNA [NM_001045481]	7.63835	up	1.1902	-1.74306	chr1	175854206	-	FALSE	mm|1qH3	15950	NM_001045481	interferon activated gene 203	chr1:175854265-175854206	GO:0035458|GO:0005634	NM_001045481	Mm.472787
A_55_P2079064	Ppnr	PREDICTED: Mus musculus per-pentamer repeat gene (Ppnr), miscRNA [XR_035714]	8.93031	up	-1.61597	-4.77468	chr19	55923148	+	FALSE	mm|19qD2	26930	XR_035714	per-pentamer repeat gene	chr19:55923148-55923207		XR_035714	Mm.439757
A_51_P187842	Eif4e3	Mus musculus eukaryotic translation initiation factor 4E member 3 (Eif4e3), mRNA [NM_025829]	11.6548	up	-4.04339	-7.58624	chr6	99575493	-	FALSE	mm|6qD3	66892	NM_025829	eukaryotic translation initiation factor 4E member 3	chr6:99575552-99575493	GO:0008150|GO:0003674|GO:0005737|GO:0003723|GO:0003743|GO:0005575|GO:0006412|GO:0006417|GO:0006413	NM_025829	Mm.32889
A_55_P2087622	Il4i1	Mus musculus interleukin 4 induced 1 (Il4i1), mRNA [NM_010215]	9.39838	up	0.299199	-2.93321	chr7	52096115	+	FALSE	mm|7qB4	14204	NM_010215	interleukin 4 induced 1	chr7:52096115-52096174	GO:0001716|GO:0016491|GO:0009072|GO:0005764|GO:0055114	NM_010215	Mm.2565
A_55_P1979645	S100a1	Mus musculus S100 calcium binding protein A1 (S100a1), mRNA [NM_011309]	19.5348	up	-3.79639	-8.08437	chr3	90315191	-	FALSE	mm|3qF1	20193	NM_011309	S100 calcium binding protein A1	chr3:90315250-90315191	GO:0005515|GO:0005737|GO:0016529|GO:0005509|GO:0051117|GO:0005634|GO:0000122|GO:0048154|GO:0046872|GO:0042803|GO:0048155|GO:0042802	NM_011309	Mm.24662
A_55_P2153621	Ahnak	Mus musculus AHNAK nucleoprotein (desmoyokin) (Ahnak), transcript variant 3, mRNA [NM_001039959]	10.3488	up	-1.74048	-5.11186	chr19	9151349	+	FALSE	mm|19qA	66395	NM_001039959	AHNAK nucleoprotein (desmoyokin)	chr19:9151349-9151408	GO:0005911	NM_001039959	Mm.203866
A_55_P2091461	Casp4	Mus musculus caspase 4, apoptosis-related cysteine peptidase (Casp4), mRNA [NM_007609]	6.03007	up	-3.05023	-5.6424	chr9	5336658	+	FALSE	mm|9qA1	12363	NM_007609	caspase 4, apoptosis-related cysteine peptidase	chr9:5336658-5336717	GO:0005622|GO:0004197|GO:0043066|GO:0016787|GO:0006508|GO:0006915|GO:0042981|GO:0008233|GO:0008234|GO:0006917	NM_007609	Mm.1569
A_55_P2083489	Fam129a	Mus musculus family with sequence similarity 129, member A (Fam129a), mRNA [NM_022018]	54.7031	up	-2.21612	-7.98967	chr1	153566107	+	FALSE	mm|1qG2	63913	NM_022018	family with sequence similarity 129, member A	chr1:153566107-153566166	GO:0003674|GO:0034976|GO:0005737|GO:0005886|GO:0006950|GO:0001934|GO:0001933|GO:0045727|GO:0005634|GO:0006417	NM_022018	Mm.482559
A_52_P663600	Pak1	Mus musculus p21 protein (Cdc42/Rac)-activated kinase 1 (Pak1), mRNA [NM_011035]	9.676	up	-1.34166	-4.61607	chr7	105060220	+	FALSE	mm|7qE2	18479	NM_011035	p21 protein (Cdc42/Rac)-activated kinase 1	chr7:105060220-105060279	GO:0030424|GO:0030018|GO:0005886|GO:0005518|GO:0005634|GO:0030425|GO:0005829|GO:0030426|GO:0005737|GO:0033138|GO:0046777|GO:0014704|GO:0007528|GO:0032956|GO:0043507|GO:0001666|GO:0031965|GO:0032869|GO:0005794|GO:0010033|GO:0019901|GO:0005624|GO:0033554|GO:0016358|GO:0004672|GO:0004674|GO:0048812|GO:0043113|GO:0006468|GO:0005925	NM_011035	Mm.260227
A_55_P2137941	Fxyd2	Mus musculus FXYD domain-containing ion transport regulator 2 (Fxyd2), transcript variant b, mRNA [NM_052823]	5.40479	up	-5.27596	-7.7102	chr9	45218302	+	FALSE	mm|9qA5.2	11936	NM_052823	FXYD domain-containing ion transport regulator 2	chr9:45218302-45218361	GO:0005792|GO:0005890|GO:0001558|GO:0016323|GO:0034220|GO:0016020|GO:0042127|GO:0006810|GO:0016021|GO:0006814|GO:0005216|GO:0006813|GO:0005391|GO:0006811	NM_052823	Mm.22742
A_55_P2029558	Adrb2	Mus musculus adrenergic receptor, beta 2 (Adrb2), mRNA [NM_007420]	7.22503	up	-4.01468	-6.86768	chr18	62338356	-	FALSE	mm|18qE1	11555	NM_007420	adrenergic receptor, beta 2	chr18:62338415-62338356	GO:0005515|GO:0051927|GO:0051929|GO:0045453|GO:0004941|GO:0009409|GO:0002024|GO:0043268|GO:0002025|GO:0015459|GO:0032403|GO:0042803|GO:0010765|GO:0045823|GO:0005792|GO:0030501|GO:0004930|GO:0060079|GO:0035240|GO:0006898|GO:0002032|GO:0043235|GO:0001993|GO:0048633|GO:0007186|GO:0050873|GO:0005887|GO:0002028|GO:0042060|GO:0071875|GO:0044424|GO:0007189|GO:0035811|GO:0051930|GO:0030424|GO:0008284|GO:…	NM_007420	Mm.5598
A_55_P1970974	4930520O04Rik	Mus musculus adult male aorta and vein cDNA, RIKEN full-length enriched library, clone:A530051I10 product:unclassifiable, full insert sequence. [AK040958]	5.59313	down	-7.85444	-5.37078	chr9	114278221	+	FALSE	mm|9qF3	75116	AK040958	RIKEN cDNA 4930520O04 gene	chr9:114278221-114278280	GO:0008150|GO:0003674|GO:0005575		Mm.72675
A_55_P2114953	Usp18	Mus musculus ubiquitin specific peptidase 18 (Usp18), mRNA [NM_011909]	6.3511	up	-1.13795	-3.80496	chr6	121220874	+	FALSE	mm|6qF1	24110	NM_011909	ubiquitin specific peptidase 18	chr6:121220874-121220933	GO:0019785|GO:0016787|GO:0032020|GO:0008152|GO:0008233|GO:0005634|GO:0008234|GO:0004221|GO:0005829	NM_011909	Mm.326911
A_55_P2082733	Cybb	Mus musculus cytochrome b-245, beta polypeptide (Cybb), mRNA [NM_007807]	30.6899	up	-1.38884	-6.32853	chrX	9013216	-	FALSE	mm|XqA1.1	13058	NM_007807	cytochrome b-245, beta polypeptide	chrX:9013275-9013216	GO:0045730|GO:0005886|GO:0005783|GO:0050660|GO:0006801|GO:0050665|GO:0046872|GO:0030425|GO:0005739|GO:0005622|GO:0005737|GO:0043025|GO:0006810|GO:0034765|GO:0006811|GO:0005791|GO:0042554|GO:0005794|GO:0005244|GO:0046982|GO:0005506|GO:0042493|GO:0009055|GO:0016020|GO:0005887|GO:0045087|GO:0016491|GO:0016021|GO:0043020|GO:0022900|GO:0005216|GO:0055114|GO:0020037	NM_007807	Mm.200362
A_55_P1967672	Tas2r109	Mus musculus taste receptor, type 2, member 109 (Tas2r109), mRNA [NM_207017]	6.21001	down	-2.1284	0.506195	chr6	132930033	-	FALSE	mm|6qG1	387343	NM_207017	taste receptor, type 2, member 109	chr6:132930092-132930033	GO:0008150|GO:0007165|GO:0003674|GO:0050909|GO:0016020|GO:0007186|GO:0004930|GO:0004872|GO:0016021|GO:0005575|GO:0004871|GO:0050896	NM_207017	Mm.377905
A_52_P390127	Klrc1	Mus musculus 0 day neonate thymus cDNA, RIKEN full-length enriched library, clone:A430076O03 product:killer cell lectin-like receptor subfamily C, member 1, full insert sequence. [AK138801]	25.7813	up	-3.37583	-8.06408	chr6	129616237	-	FALSE	mm|6qF3	16641	AK138801	killer cell lectin-like receptor subfamily C, member 1	chr6:129616296-129616237	GO:0005886|GO:0004872|GO:0009897		Mm.56899
A_66_P124284	Tmem90a	Mus musculus transmembrane protein 90a (Tmem90a), mRNA [NM_001033334]	5.24433	up	-3.08876	-5.47952	chr12	86018237	-	FALSE	mm|12qD1	627191	NM_001033334	transmembrane protein 90a	chr12:86018296-86018237	GO:0009607|GO:0008150|GO:0003674|GO:0005794|GO:0016020|GO:0016021	NM_001033334	Mm.152484
A_52_P65108	Smad1	Mus musculus MAD homolog 1 (Drosophila) (Smad1), mRNA [NM_008539]	10.9921	up	-4.60046	-8.05885	chr8	81863015	-	FALSE	mm|8qC2	17125	NM_008539	MAD homolog 1 (Drosophila)	chr8:81863074-81863015	GO:0005515|GO:0003700|GO:0008285|GO:0045597|GO:0005637|GO:0001710|GO:0005634|GO:0042802|GO:0005829|GO:0005622|GO:0005737|GO:0000165|GO:0045944|GO:0007179|GO:0005667|GO:0006355|GO:0006357|GO:0019901|GO:0007276|GO:0042493|GO:0070410|GO:0002051|GO:0070411|GO:0042592|GO:0030509|GO:0006351|GO:0045669|GO:0010628|GO:0007183|GO:0071407|GO:0061036|GO:0005654|GO:0006468|GO:0030901|GO:0030902	NM_008539	Mm.223717
A_52_P591153	Pld4	Mus musculus phospholipase D family, member 4 (Pld4), mRNA [NM_178911]	5.94877	up	1.1984	-1.37419	chr12	114006018	+	FALSE	mm|12qF1	104759	NM_178911	phospholipase D family, member 4	chr12:114006018-114006077	GO:0016042|GO:0005515|GO:0008150|GO:0016787|GO:0016020|GO:0070290|GO:0008152|GO:0004630|GO:0016021|GO:0005575|GO:0003824	NM_178911	Mm.203915
A_55_P1995617	Kir3dl1	Mus musculus killer cell immunoglobulin-like receptor, three domains, long cytoplasmic tail, 1 (Kir3dl1), mRNA [NM_177749]	8.51778	up	-5.00543	-8.0959	chrX	133068723	+	FALSE	mm|XqF1	245616	NM_177749	killer cell immunoglobulin-like receptor, three domains, long cytoplasmic tail, 1	chrX:133068723-133068782	GO:0008150|GO:0003674|GO:0004872|GO:0005575	NM_177749	Mm.246625
A_55_P2138174	Psd3	Mus musculus pleckstrin and Sec7 domain containing 3 (Psd3), transcript variant 2, mRNA [NM_177698]	5.55701	down	-3.34641	-0.872101	chr8	70213658	-	FALSE	mm|8qB3.3	234353	NM_177698	pleckstrin and Sec7 domain containing 3	chr8:70213717-70213658	GO:0030054|GO:0005886|GO:0005624|GO:0045202|GO:0005085|GO:0005622|GO:0005086|GO:0005737|GO:0050790|GO:0016020|GO:0045211|GO:0032012|GO:0032011	NM_177698	Mm.32525
A_51_P458778	Hpgd	Mus musculus hydroxyprostaglandin dehydrogenase 15 (NAD) (Hpgd), mRNA [NM_008278]	34.6583	up	-2.82027	-7.9354	chr8	58799399	+	FALSE	mm|8qB2	15446	NM_008278	hydroxyprostaglandin dehydrogenase 15 (NAD)	chr8:58799399-58799458	GO:0006629|GO:0007565|GO:0006693|GO:0007567|GO:0070403|GO:0005634|GO:0045786|GO:0003824|GO:0004957|GO:0005737|GO:0051287|GO:0005488|GO:0008152|GO:0016491|GO:0006631|GO:0007179|GO:0055114|GO:0016404	NM_008278	Mm.18832
A_66_P112816	B4galt6	Mus musculus UDP-Gal:betaGlcNAc beta 1,4-galactosyltransferase, polypeptide 6 (B4galt6), mRNA [NM_019737]	9.33779	up	-4.86453	-8.08761	chr18	20843226	-	FALSE	mm|18qA2	56386	NM_019737	UDP-Gal:betaGlcNAc beta 1,4-galactosyltransferase, polypeptide 6	chr18:20843285-20843226	GO:0005794|GO:0016020|GO:0016757|GO:0005975|GO:0030148|GO:0008489|GO:0008152|GO:0016021|GO:0005575|GO:0008378|GO:0046872|GO:0016740	NM_019737	Mm.393827
A_51_P254425	Ahrr	Mus musculus aryl-hydrocarbon receptor repressor (Ahrr), mRNA [NM_009644]	20.8686	up	-3.65417	-8.03743	chr13	74348566	-	FALSE	mm|13qC1	11624	NM_009644	aryl-hydrocarbon receptor repressor	chr13:74348612-74348566	GO:0007165|GO:0006355|GO:0005737|GO:0006805|GO:0033235|GO:0005634|GO:0004871|GO:0000122|GO:0009410|GO:0045892|GO:0003677|GO:0006351	NM_009644	Mm.290446
A_55_P2020101	LOC100041550	Mus musculus hypothetical protein LOC100041550 (LOC100041550), mRNA [NM_001199332]	6.11603	up	-5.41038	-8.02298	chrY_random	8782330	-	FALSE		100041550	NM_001199332	hypothetical protein LOC100041550	chrY_random:8782389-8782330		NM_001199332	Mm.485768
A_55_P2012989	Slamf7	Mus musculus SLAM family member 7 (Slamf7), mRNA [NM_144539]	9.72671	up	-3.37942	-6.66138	chr1	173562534	-	FALSE	mm|1qH3	75345	NM_144539	SLAM family member 7	chr1:173562593-173562534	GO:0005515|GO:0016020|GO:0005886|GO:0032814|GO:0004872|GO:0016021	NM_144539	Mm.164642
A_55_P2075510		immunoglobulin heavy variable V1-23 [Source:MGI Symbol;Acc:MGI:3815050] [ENSMUST00000103508]	5.39483	down	0.717807	3.14938	chr12	116002746	-	FALSE	mm|12qF2		FN652764		chr12:116002805-116002746			Mm.479862
A_55_P2039215	Acyp2	Mus musculus acylphosphatase 2, muscle type (Acyp2), mRNA [NM_029344]	6.08317	up	-5.32403	-7.92885	chr11	30406126	-	FALSE	mm|11qA4	75572	NM_029344	acylphosphatase 2, muscle type	chr11:30406185-30406126	GO:0005739|GO:0008150|GO:0003674|GO:0016787|GO:0003998	NM_029344	Mm.390319
A_51_P493016	Cmya5	Mus musculus cardiomyopathy associated 5 (Cmya5), mRNA [NM_023821]	6.27513	up	-3.71774	-6.36739	chr13	93810830	-	FALSE	mm|13qC3	76469	NM_023821	cardiomyopathy associated 5	chr13:93810889-93810830	GO:0005515|GO:0008150|GO:0042802	NM_023821	Mm.33857
A_55_P2011380	Acvrl1	Mus musculus activin A receptor, type II-like 1 (Acvrl1), mRNA [NM_009612]	6.27049	up	-2.15689	-4.80547	chr15	100974010	+	FALSE	mm|15qF2	11482	NM_009612	activin A receptor, type II-like 1	chr15:100974010-100974069	GO:0016361|GO:0005515|GO:0030308|GO:0035313|GO:0008285|GO:0008015|GO:0048514|GO:0046332|GO:0051291|GO:0046872|GO:0030425|GO:0051895|GO:0030513|GO:0004702|GO:0000166|GO:0048185|GO:0016301|GO:0043025|GO:0005024|GO:0004872|GO:0007179|GO:0005025|GO:0016772|GO:0050431|GO:0030336|GO:0006355|GO:0009986|GO:0001525|GO:0005524|GO:0001701|GO:0016310|GO:0007165|GO:0010596|GO:0007162|GO:0004672|GO:0016020|GO:…	NM_009612	Mm.279542
A_55_P2154933	Cd200r4	Mus musculus CD200 receptor 4 (Cd200r4), mRNA [NM_207244]	12.4538	up	-4.37199	-8.01051	chr16	44838106	+	FALSE	mm|16qB4	239849	NM_207244	CD200 receptor 4	chr16:44838106-44838165	GO:0005515|GO:0007165|GO:0016020|GO:0004872|GO:0016021|GO:0009897	NM_207244	Mm.445045
A_55_P2075195	Cd302	Mus musculus CD302 antigen (Cd302), mRNA [NM_025422]	5.26579	up	-1.33764	-3.73429	chr2	60090050	-	FALSE	mm|2qC1.1	66205	NM_025422	CD302 antigen	chr2:60090109-60090050	GO:0008150|GO:0003674|GO:0016020|GO:0005488|GO:0005529|GO:0016021|GO:0005575	NM_025422	Mm.227281
A_51_P183912	Il27ra	Mus musculus interleukin 27 receptor, alpha (Il27ra), mRNA [NM_016671]	5.53238	up	-5.52064	-7.98854	chr8	86554885	-	FALSE	mm|8qC3	50931	NM_016671	interleukin 27 receptor, alpha	chr8:86554944-86554885	GO:0048302|GO:0032729|GO:0005515|GO:0016020|GO:0002829|GO:0050830|GO:0002827|GO:0004872|GO:0016021|GO:0045509	NM_016671	Mm.38386
A_55_P2051716	Tbx1	Mus musculus T-box 1 (Tbx1), mRNA [NM_011532]	8.94263	down	-7.53842	-4.37772	chr16	18581807	-	FALSE	mm|16qA3	21380	NM_011532	T-box 1	chr16:18581866-18581807	GO:0005515|GO:0007389|GO:0003700|GO:0007605|GO:0001755|GO:0048538|GO:0048844|GO:0030878|GO:0048703|GO:0048752|GO:0048701|GO:0042803|GO:0042693|GO:0007507|GO:0048644|GO:0001945|GO:0050679|GO:0042471|GO:0042472|GO:0001708|GO:0021644|GO:0060037|GO:0007517|GO:0035176|GO:0045596|GO:0045893|GO:0008284|GO:0007368|GO:0008283|GO:2000027|GO:0048514|GO:0005634|GO:0009952|GO:0045944|GO:0030855|GO:0090103|GO:…	NM_011532	Mm.295194
A_51_P292116	Ica1	Mus musculus islet cell autoantigen 1 (Ica1), mRNA [NM_010492]	9.33306	up	-4.63999	-7.86234	chr6	8580546	-	FALSE	mm|6qA1	15893	NM_010492	islet cell autoantigen 1	chr6:8580605-8580546	GO:0043496|GO:0048471|GO:0005737|GO:0005795|GO:0000139|GO:0019904|GO:0005634|GO:0030425|GO:0030667	NM_010492	Mm.275683
A_51_P256827	S100a8	Mus musculus S100 calcium binding protein A8 (calgranulin A) (S100a8), mRNA [NM_013650]	881.742	up	1.77989	-8.00432	chr3	90473778	+	FALSE	mm|3qF1	20201	NM_013650	S100 calcium binding protein A8 (calgranulin A)	chr3:90473778-90473837	GO:0005737|GO:0016020|GO:0006935|GO:0005886|GO:0005509|GO:0005576|GO:0005856|GO:0005615	NM_013650	Mm.21567
A_55_P2063316	Mgll	Mus musculus monoglyceride lipase (Mgll), transcript variant 1, mRNA [NM_001166251]	13.7525	up	-2.4955	-6.27712	chr6	88778292	+	FALSE	mm|6qD1	23945	NM_001166251	monoglyceride lipase	chr6:88778292-88778351	GO:0004091|GO:0006629|GO:0019369|GO:0008610|GO:0050727|GO:0045202|GO:0060292|GO:0009966|GO:2000124|GO:0042803|GO:0008289|GO:0016042|GO:0016787|GO:0047372|GO:0006633|GO:0046464|GO:0051930	NM_001166251	Mm.272197
A_51_P281582	Lrrc42	Mus musculus leucine rich repeat containing 42 (Lrrc42), mRNA [NM_029985]	6.76579	up	-0.620908	-3.37917	chr4	106911696	-	FALSE	mm|4qC7	77809	NM_029985	leucine rich repeat containing 42	chr4:106911755-106911696	GO:0008150|GO:0003674|GO:0005575	NM_029985	Mm.29681
A_55_P2012221	Armcx2	Mus musculus armadillo repeat containing, X-linked 2 (Armcx2), transcript variant 1, mRNA [NM_026139]	6.02724	up	-1.88429	-4.47579	chrX	131338686	-	FALSE	mm|XqE3	67416	NM_026139	armadillo repeat containing, X-linked 2	chrX:131338745-131338686	GO:0008150|GO:0003674|GO:0016020|GO:0005488|GO:0016021|GO:0005575	NM_026139	Mm.285969
A_51_P154842	Oas1f	Mus musculus 2'-5' oligoadenylate synthetase 1F (Oas1f), mRNA [NM_145153]	7.17123	up	-1.63404	-4.47626	chr5	121307929	+	FALSE	mm|5qF	243262	NM_145153	2'-5' oligoadenylate synthetase 1F	chr5:121307929-121307988	GO:0008150|GO:0003674|GO:0005575	NM_145153	Mm.105369
A_55_P2088995	Plscr1	Mus musculus phospholipid scramblase 1 (Plscr1), mRNA [NM_011636]	15.1854	up	-0.923144	-4.84776	chr9	92164754	+	FALSE	mm|9qE3.3	22038	NM_011636	phospholipid scramblase 1	chr9:92164754-92164813	GO:0017124|GO:0006955|GO:0016020|GO:0030099|GO:0016021|GO:0009615	NM_011636	Mm.441702
A_55_P1997305			12.6818	up	-4.34454	-8.00923	chr9	48239985	+	FALSE	mm|9qA5.3				chr9:048239985-048240044
A_52_P130727	Ldoc1l	Mus musculus leucine zipper, down-regulated in cancer 1-like (Ldoc1l), mRNA [NM_177630]	19.3961	up	-3.53761	-7.8153	chr15	84384131	-	FALSE	mm|15qE2	223732	NM_177630	leucine zipper, down-regulated in cancer 1-like	chr15:84384190-84384131	GO:0008150|GO:0003674|GO:0005575	NM_177630	Mm.6471
A_52_P42245	Klrb1a	Mus musculus killer cell lectin-like receptor subfamily B member 1A (Klrb1a), transcript variant 1, mRNA [NM_010737]	14.495	up	-4.08701	-7.94449	chr6	128568515	-	FALSE	mm|6qF3	17057	NM_010737	killer cell lectin-like receptor subfamily B member 1A	chr6:128568574-128568515	GO:0008150|GO:0003674|GO:0016020|GO:0005488|GO:0005529|GO:0004872|GO:0016021|GO:0005575	NM_010737	Mm.16729
A_51_P220723	B230118H07Rik	Mus musculus RIKEN cDNA B230118H07 gene (B230118H07Rik), mRNA [NM_026592]	5.48454	up	1.78139	-0.673979	chr2	101402325	-	FALSE	mm|2qE2	68170	NM_026592	RIKEN cDNA B230118H07 gene	chr2:101402384-101402325	GO:0008150|GO:0003674|GO:0005575	NM_026592	Mm.31263
A_55_P2165655	Zbtb4	Mus musculus zinc finger and BTB domain containing 4 (Zbtb4), mRNA [NM_029348]	7.27785	up	-2.70396	-5.56747	chr11	69595315	+	FALSE	mm|11qB3	75580	NM_029348	zinc finger and BTB domain containing 4	chr11:69595315-69595374	GO:0008150|GO:0003674|GO:0005634|GO:0005575|GO:0046872	NM_029348	Mm.426361
A_66_P119968	Clec4a1	Mus musculus C-type lectin domain family 4, member a1 (Clec4a1), mRNA [NM_199311]	69.4427	up	0.197119	-5.92063	chr6	122884578	+	FALSE	mm|6qF2	269799	NM_199311	C-type lectin domain family 4, member a1	chr6:122884578-122884637	GO:0008150|GO:0003674|GO:0005529|GO:0004872|GO:0005575	NM_199311	Mm.297275
A_66_P102346		predicted gene, 16634 [Source:MGI Symbol;Acc:MGI:4439558] [ENSMUST00000103321]	10.8249	down	-5.407	-1.97072	chr6	68221019	+	FALSE	mm|6qC1		U41438		chr6:68221019-68221078			Mm.333124
A_55_P2000958	Sdr39u1	Mus musculus short chain dehydrogenase/reductase family 39U, member 1 (Sdr39u1), mRNA [NM_001082975]	55.8095	up	0.181082	-5.62136	chr14	56516124	-	FALSE	mm|14qC3	654795	NM_001082975	short chain dehydrogenase/reductase family 39U, member 1	chr14:56516183-56516124	GO:0050662|GO:0008150|GO:0003674|GO:0005488|GO:0005575|GO:0003824|GO:0044237	NM_001082975	Mm.387102
A_51_P223569	Ddx4	Mus musculus DEAD (Asp-Glu-Ala-Asp) box polypeptide 4 (Ddx4), transcript variant 2, mRNA [NM_010029]	12.4074	down	-2.73173	0.901402	chr13	113388616	-	FALSE	mm|13qD2.2	13206	NM_010029	DEAD (Asp-Glu-Ala-Asp) box polypeptide 4	chr13:113388675-113388616	GO:0005515|GO:0008026|GO:0048471|GO:0000237|GO:0004386|GO:0005634|GO:0007275|GO:0030317|GO:0007283|GO:0003676|GO:0005524|GO:0032880|GO:0033391|GO:0005737|GO:0000166|GO:0016787|GO:0030529|GO:0044464|GO:0071546|GO:0071547|GO:0007141	NM_010029	Mm.12818
A_55_P2058881	Gm10560	PREDICTED: Mus musculus predicted gene 10560 (Gm10560), mRNA [XM_003084604]	5.04865	down	-7.83814	-5.50224	chr4	155395743	-	FALSE	mm|4qE2	100038526	XM_003084604	predicted gene 10560	chr4:155395802-155395743	GO:0008150|GO:0003674|GO:0005575	XM_003084604	Mm.191866
A_52_P493519	Igll1	Mus musculus immunoglobulin lambda-like polypeptide 1 (Igll1), mRNA [NM_001190325]	6.14035	down	-7.8331	-5.21478	chr16	16861104	-	FALSE	mm|16qA3	16136	NM_001190325	immunoglobulin lambda-like polypeptide 1	chr16:16861163-16861104	GO:0005515	NM_001190325	Mm.184441
A_52_P337126	Bves	Mus musculus blood vessel epicardial substance (Bves), mRNA [NM_024285]	5.00529	up	-5.1948	-7.51826	chr10	45089408	+	FALSE	mm|10qB2	23828	NM_024285	blood vessel epicardial substance	chr10:45089408-45089467	GO:0090136|GO:0005515|GO:0030054|GO:0005886|GO:0008360|GO:0007275|GO:0016328|GO:0043088|GO:0032314|GO:0016020|GO:0005198|GO:0001921|GO:0034446|GO:0040017|GO:0005923|GO:0016021|GO:0007155|GO:0016192	NM_024285	Mm.332793
A_55_P2025937		predicted pseudogene 10212 [Source:MGI Symbol;Acc:MGI:3641904] [ENSMUST00000087884]	9.41798	up	-4.46018	-7.6956	chr19	11644021	+	FALSE	mm|19qA				chr19:11644021-11644080
A_55_P2127699	Pira2	Mus musculus paired-Ig-like receptor A2 (Pira2), mRNA [NM_011089]	5.48908	up	-1.89327	-4.34983	chr7	3795605	-	FALSE	mm|7qA1	18725	NM_011089	paired-Ig-like receptor A2	chr7:3795664-3795605	GO:0008150|GO:0003674|GO:0005575	NM_011089	Mm.482470
A_51_P452779	Pygl	Mus musculus liver glycogen phosphorylase (Pygl), mRNA [NM_133198]	108.218	up	-1.3268	-8.0846	chr12	71291855	-	FALSE	mm|12qC2	110095	NM_133198	liver glycogen phosphorylase	chr12:71291914-71291855	GO:0032052|GO:0016208|GO:0016757|GO:0005975|GO:0005977|GO:0005529|GO:0008184|GO:0019842|GO:0005625|GO:0042593|GO:0004645|GO:0005524|GO:0042803|GO:0005737|GO:0008144|GO:0006015|GO:0002060|GO:0016740|GO:0005980	NM_133198	Mm.256926
A_66_P105422	Lonrf3	Mus musculus LON peptidase N-terminal domain and ring finger 3 (Lonrf3), mRNA [NM_028894]	53.0299	up	-1.98889	-7.71763	chrX	33906756	+	FALSE	mm|XqA3.3	74365	NM_028894	LON peptidase N-terminal domain and ring finger 3	chrX:33906756-33906815	GO:0008150|GO:0003674|GO:0005488|GO:0004176|GO:0006508|GO:0008270|GO:0005575|GO:0046872	NM_028894	Mm.327654
A_55_P2096797	Nlrp1b	Mus musculus NLR family, pyrin domain containing 1B (Nlrp1b), transcript variant 1, mRNA [NM_001040696]	21.6547	up	-3.62885	-8.06545	chr11	70966612	-	FALSE	mm|11qB4	637515	NM_001040696	NLR family, pyrin domain containing 1B	chr11:70966671-70966612	GO:0008150|GO:0003674|GO:0000166|GO:0005575|GO:0005524	NM_001040696	Mm.390402
A_51_P104392	Rpp25	Mus musculus ribonuclease P 25 subunit (human) (Rpp25), mRNA [NM_133982]	6.21103	up	-4.81559	-7.45042	chr9	57353026	+	FALSE	mm|9qB	102614	NM_133982	ribonuclease P 25 subunit (human)	chr9:57353026-57353085	GO:0008150|GO:0003674|GO:0016787|GO:0004526|GO:0003723|GO:0005634|GO:0005575|GO:0003676|GO:0008033	NM_133982	Mm.274421
A_52_P311297	Als2	Mus musculus amyotrophic lateral sclerosis 2 (juvenile) homolog (human) (Als2), transcript variant 1, mRNA [NM_028717]	9.53066	up	-4.23056	-7.48313	chr1	59220629	-	FALSE	mm|1qC1.3	74018	NM_028717	amyotrophic lateral sclerosis 2 (juvenile) homolog (human)	chr1:59220688-59220629	GO:0005515|GO:0008219|GO:0007409|GO:0032855|GO:0042803|GO:0042802|GO:0005085|GO:0005622|GO:0016050|GO:0032313|GO:0042598|GO:0045860|GO:0043025|GO:0051260|GO:0007032|GO:0001662|GO:0005089|GO:0019717|GO:0006979|GO:0030675|GO:0030676|GO:0005792|GO:0005813|GO:0017137|GO:0014069|GO:0030027|GO:0043234|GO:0007041|GO:0043539|GO:0030424|GO:0071902|GO:0035023|GO:0005634|GO:0030425|GO:0005829|GO:0030426|GO:…	NM_028717	Mm.272078
A_51_P366138	Mertk	Mus musculus c-mer proto-oncogene tyrosine kinase (Mertk), mRNA [NM_008587]	20.5461	up	-3.68546	-8.04625	chr2	128627867	+	FALSE	mm|2qF1	17289	NM_008587	c-mer proto-oncogene tyrosine kinase	chr2:128627867-128627924	GO:0006909|GO:0060041|GO:0060068|GO:0007283|GO:0000166|GO:0016301|GO:0034446|GO:0004872|GO:0001779|GO:0016772|GO:0030168|GO:0043277|GO:0005524|GO:0016310|GO:0004672|GO:0016020|GO:0043491|GO:0051250|GO:0006468|GO:0016021|GO:0004713|GO:0004714|GO:0032940|GO:0016740|GO:0001750	NM_008587	Mm.239655
A_51_P171107	Tmem35	Mus musculus transmembrane protein 35 (Tmem35), mRNA [NM_026239]	6.25507	up	-5.47572	-8.12074	chrX	130840254	+	FALSE	mm|XqE3	67564	NM_026239	transmembrane protein 35	chrX:130840254-130840313	GO:0008150|GO:0003674|GO:0016020|GO:0031410|GO:0016021|GO:0005575|GO:0005777	NM_026239	Mm.41489
A_51_P286357	Emr4	Mus musculus EGF-like module containing, mucin-like, hormone receptor-like sequence 4 (Emr4), mRNA [NM_139138]	17.595	up	-3.94758	-8.08468	chr17	55992348	+	FALSE	mm|17qD	52614	NM_139138	EGF-like module containing, mucin-like, hormone receptor-like sequence 4	chr17:55992348-55992407	GO:0005886|GO:0009986|GO:0004930|GO:0005509|GO:0007165|GO:0016020|GO:0007173|GO:0007186|GO:0005887|GO:0007218|GO:0004872|GO:0016021|GO:0004871|GO:0007166|GO:0004888	NM_139138	Mm.210497
A_51_P339540	Cdkn1c	Mus musculus cyclin-dependent kinase inhibitor 1C (P57) (Cdkn1c), transcript variant 2, mRNA [NM_009876]	21.45	up	-2.05483	-6.47774	chr7	150644753	-	FALSE	mm|7qF5	12577	NM_009876	cyclin-dependent kinase inhibitor 1C (P57)	chr7:150644812-150644753	GO:0005515|GO:0033673|GO:0042551|GO:0050680|GO:0005634|GO:0000122|GO:0042326|GO:0016310|GO:0005737|GO:0007049|GO:0016301|GO:0004861|GO:0004860|GO:0007050|GO:0045893|GO:0045892|GO:0030511	NM_009876	Mm.168789
A_52_P514061	Padi4	Mus musculus peptidyl arginine deiminase, type IV (Padi4), mRNA [NM_011061]	6.61685	up	-4.09848	-6.82463	chr4	140301675	-	FALSE	mm|4qD3	18602	NM_011061	peptidyl arginine deiminase, type IV	chr4:140301734-140301675	GO:0018101|GO:0006355|GO:0005737|GO:0016787|GO:0008152|GO:0005509|GO:0005634|GO:0004668|GO:0046872|GO:0006464|GO:0006351|GO:0016568	NM_011061	Mm.250358
A_55_P2048418	Mdfic	Mus musculus MyoD family inhibitor domain containing (Mdfic), mRNA [NM_175088]	19.3169	up	-0.9205	-5.19229	chr6	15752080	+	FALSE	mm|6qA1	16543	NM_175088	MyoD family inhibitor domain containing	chr6:15752080-15752139	GO:0005515|GO:0006355|GO:0030111|GO:0030332|GO:0005730|GO:0005634|GO:0007257|GO:0030957|GO:0006351|GO:0050434|GO:0005737|GO:0042308|GO:0045893|GO:0045892|GO:0008134	NM_175088	Mm.1314
A_51_P241457	Lilrb4	Mus musculus leukocyte immunoglobulin-like receptor, subfamily B, member 4 (Lilrb4), mRNA [NM_013532]	61.2405	up	0.233185	-5.70323	chr10	51212976	+	FALSE	mm|10qB3	14728	NM_013532	leukocyte immunoglobulin-like receptor, subfamily B, member 4	chr10:51212976-51213891	GO:0016020|GO:0005886|GO:0004872|GO:0016021	NM_013532	Mm.34408
A_51_P191354	Acot6	acyl-CoA thioesterase 6 [Source:MGI Symbol;Acc:MGI:1921287] [ENSMUST00000056822]	10.1655	up	-4.75265	-8.09825	chr12	85451951	+	FALSE	mm|12qD1	217700	AK014558	acyl-CoA thioesterase 6	chr12:85451951-85452010	GO:0006629|GO:0004091|GO:0006637|GO:0016787|GO:0016290|GO:0016790|GO:0005829|GO:0005777		Mm.49245
A_55_P2404808	2210406H18Rik	Mus musculus adult male stomach cDNA, RIKEN full-length enriched library, clone:2210406H18 product:unclassifiable, full insert sequence. [AK008836]	5.13977	up	-4.168	-6.5297	chr7	128206366	-	FALSE	mm|7qF2	70133	AK008836	RIKEN cDNA 2210406H18 gene	chr7:128206425-128206366	GO:0008150|GO:0003674|GO:0005575		Mm.403315
A_55_P2007437	6030422M02Rik	RIKEN cDNA 6030422M02 gene [Source:MGI Symbol;Acc:MGI:3045334] [ENSMUST00000125294]	5.68446	up	-4.00891	-6.51593	chr1	9910746	+	FALSE	mm|1qA2	240697		RIKEN cDNA 6030422M02 gene	chr1:9910746-9910805	GO:0008150|GO:0003674|GO:0005575
A_55_P1953851	Stk39	Mus musculus serine/threonine kinase 39, STE20/SPS1 homolog (yeast) (Stk39), mRNA [NM_016866]	6.20542	up	-3.44691	-6.08044	chr2	68048524	-	FALSE	mm|2qC1.3	53416	NM_016866	serine/threonine kinase 39, STE20/SPS1 homolog (yeast)	chr2:68048583-68048524	GO:0005515|GO:0019901|GO:0043268|GO:0005624|GO:0005634|GO:0005524|GO:0016310|GO:0016323|GO:0016324|GO:0005737|GO:0004672|GO:0000166|GO:0004674|GO:0016301|GO:0006468|GO:0005856|GO:0016740|GO:0016772	NM_016866	Mm.198414
A_55_P1992049	Gucy1a3	Mus musculus guanylate cyclase 1, soluble, alpha 3 (Gucy1a3), mRNA [NM_021896]	17.5896	down	-5.98419	-1.84754	chr3	81896409	-	FALSE	mm|3qE3	60596	NM_021896	guanylate cyclase 1, soluble, alpha 3	chr3:81896468-81896409	GO:0046982|GO:0007263|GO:0016849|GO:0052565|GO:0043167|GO:0004383|GO:0005525|GO:0016829|GO:0060087|GO:0035556|GO:0008074|GO:0043234|GO:0005737|GO:0000166|GO:0006182|GO:0008217|GO:0030828|GO:0009190|GO:0020037	NM_021896	Mm.143831
A_55_P2110925	Flrt3	Mus musculus fibronectin leucine rich transmembrane protein 3 (Flrt3), transcript variant 1, mRNA [NM_001172160]	23.4126	up	-3.10226	-7.65147	chr2	140483956	-	FALSE	mm|2qF3	71436	NM_001172160	fibronectin leucine rich transmembrane protein 3	chr2:140484015-140483956	GO:0016021	NM_001172160	Mm.426781
A_55_P2074688	Hoxc4	Mus musculus homeobox C4 (Hoxc4), mRNA [NM_013553]	56.5698	down	-4.81793	1.00403	chr15	102867213	+	FALSE	mm|15qF3	15423	NM_013553	homeobox C4	chr15:102867213-102867272	GO:0006355|GO:0003700|GO:0051216|GO:0005634|GO:0007275|GO:0005575|GO:0009952|GO:0003677|GO:0006351|GO:0048562|GO:0043565|GO:0003674|GO:0001501	NM_013553	Mm.1351
A_55_P2108708	Kcne3	Mus musculus potassium voltage-gated channel, Isk-related subfamily, gene 3 (Kcne3), transcript variant 4, mRNA [NM_001190870]	11.709	up	-0.51008	-4.05963	chr7	107332867	+	FALSE	mm|7qE2	57442	NM_001190870	potassium voltage-gated channel, Isk-related subfamily, gene 3	chr7:107332867-107332926	GO:0005244|GO:0005267|GO:0015459|GO:0043266|GO:0016020|GO:0005249|GO:0008076|GO:0006810|GO:0034765|GO:0016021|GO:0005216|GO:0006813|GO:0071805|GO:0006811	NM_001190870	Mm.282386
A_51_P380178	Id3	Mus musculus inhibitor of DNA binding 3 (Id3), mRNA [NM_008321]	7.6763	up	0.660892	-2.27952	chr4	135700075	+	FALSE	mm|4qD3	15903	NM_008321	inhibitor of DNA binding 3	chr4:135700075-135700249	GO:0005515|GO:0006355|GO:0043065|GO:0003700|GO:0019904|GO:0005634|GO:0007275|GO:0000122|GO:0043433|GO:0006351|GO:0007507|GO:0051789|GO:0005737|GO:0045668|GO:0030855|GO:0051726|GO:0045892|GO:0006275|GO:0008134	NM_008321	Mm.110
A_52_P385606	Ckb	Mus musculus creatine kinase, brain (Ckb), mRNA [NM_021273]	14.4169	up	0.35324	-3.49645	chr12	112908459	-	FALSE	mm|12qF1	12709	NM_021273	creatine kinase, brain	chr12:112909105-112908459	GO:0004111|GO:0003824|GO:0005524|GO:0005829|GO:0005739|GO:0016310|GO:0005737|GO:0000166|GO:0030644|GO:0006600|GO:0016301|GO:0016740|GO:0016772	NM_021273	Mm.16831
A_51_P433650	Vmn1r212	Mus musculus vomeronasal 1 receptor 212 (Vmn1r212), mRNA [NM_134241]	6.83607	up	-5.15494	-7.92811	chr13	22975024	-	FALSE	mm|13qA3.1	171275	NM_134241	vomeronasal 1 receptor 212	chr13:22975083-22975024	GO:0005550|GO:0016503|GO:0007186|GO:0005887|GO:0004872|GO:0019236	NM_134241	Mm.377227
A_66_P117477	Dlk1	Mus musculus delta-like 1 homolog (Drosophila) (Dlk1), transcript variant 1, mRNA [NM_010052]	8.7019	up	0.433967	-2.68736	chr12	110698721	+	FALSE	mm|12qF1	13386	NM_010052	delta-like 1 homolog (Drosophila)	chr12:110698721-110698781	GO:0005515|GO:0016020|GO:0005509|GO:0048706|GO:0016021|GO:0009790|GO:0009791|GO:0030154|GO:0009897	NM_010052	Mm.157069
A_52_P99810	Cx3cr1	Mus musculus chemokine (C-X3-C) receptor 1 (Cx3cr1), mRNA [NM_009987]	5.2653	up	-1.06862	-3.46513	chr9	119959018	-	FALSE	mm|9qF4	13051	NM_009987	chemokine (C-X3-C) receptor 1	chr9:119959077-119959018	GO:0043005|GO:0048471|GO:0043066|GO:0030336|GO:0004896|GO:0005886|GO:0004930|GO:0019221|GO:0045766|GO:0032809|GO:0007165|GO:0021795|GO:0007186|GO:0016020|GO:0016495|GO:0016525|GO:0004950|GO:0002282|GO:0004872|GO:0048246|GO:0004871|GO:0016021	NM_009987	Mm.44065
A_51_P469443	8030474K03Rik	RIKEN cDNA 8030474K03 gene [Source:MGI Symbol;Acc:MGI:2685988] [ENSMUST00000151231]	12.9376	up	-2.12934	-5.82284	chrX	98992722	+	FALSE	mm|XqD	382231	XM_001000772	RIKEN cDNA 8030474K03 gene	chrX:98992722-98992781	GO:0008150|GO:0003674|GO:0005575	XM_001000772	Mm.328112
A_51_P216219	Ptk2	Mus musculus PTK2 protein tyrosine kinase 2 (Ptk2), transcript variant 1, mRNA [NM_007982]	10.2477	up	-1.64488	-5.00212	chr15	73035632	-	FALSE	mm|15qD3	14083	NM_007982	PTK2 protein tyrosine kinase 2	chr15:73035691-73035632	GO:0005515|GO:0030054|GO:0030307|GO:0032403|GO:0046777|GO:0007172|GO:0000166|GO:0000165|GO:0016301|GO:0030198|GO:0005856|GO:0042169|GO:0016772|GO:0030336|GO:0051964|GO:0030335|GO:0018108|GO:0030027|GO:0045785|GO:0016310|GO:0005178|GO:0030644|GO:0043542|GO:0007229|GO:0050806|GO:0050771|GO:0005925|GO:0043548|GO:0033628|GO:0005886|GO:0006928|GO:0060396|GO:0005634|GO:0005829|GO:0014911|GO:0016323|GO:…	NM_007982	Mm.254494
A_55_P1997651	Espn	Mus musculus espin (Espn), transcript variant 1, mRNA [NM_207687]	5.17715	down	-1.90832	0.463837	chr4	151495230	-	FALSE	mm|4qE2	56226	NM_207687	espin	chr4:151495289-151495230	GO:0017124|GO:0030054|GO:0007605|GO:0030046|GO:0003779|GO:0032421|GO:0042995|GO:0015629|GO:0005903|GO:0005902|GO:0005737|GO:0051015|GO:0031941|GO:0051639|GO:0051494|GO:0007626|GO:0005856|GO:0051017	NM_207687	Mm.264215
A_55_P2146214	Zcchc18	Mus musculus zinc finger, CCHC domain containing 18 (Zcchc18), transcript variant 1, mRNA [NM_001035510]	13.444	up	-3.95183	-7.70072	chrX	133530733	+	FALSE	mm|XqF1	66995	NM_001035510	zinc finger, CCHC domain containing 18	chrX:133530733-133530792	GO:0008150|GO:0003674|GO:0008270|GO:0005575|GO:0003676|GO:0046872	NM_001035510	Mm.440155
A_55_P2071354	Fam179a	Mus musculus family with sequence similarity 179, member A (Fam179a), mRNA [NM_177087]	29.4969	up	-3.26176	-8.14425	chr17	72078928	+	FALSE	mm|17qE1.3	320159	NM_177087	family with sequence similarity 179, member A	chr17:72078928-72078987	GO:0008150|GO:0003674|GO:0005488|GO:0005575	NM_177087	Mm.187372
A_55_P1965911		Q810N5_MOUSE (Q810N5) BC049715 protein, partial (94%) [TC1589582]	8.2414	down	-7.44499	-4.40211				FALSE
A_55_P2060183	Lamtor3	Mus musculus late endosomal/lysosomal adaptor, MAPK and MTOR activator 3 (Lamtor3), mRNA [NM_019920]	5.54064	down	4.868	7.33805	chr3	137591568	+	FALSE	mm|3qG3	56692	NM_019920	late endosomal/lysosomal adaptor, MAPK and MTOR activator 3	chr3:137591568-137591627	GO:0071986|GO:0019209|GO:0000186|GO:0032008|GO:0071230|GO:0005770|GO:0034613|GO:0042327	NM_019920	Mm.331392
A_55_P2184704	A430107P09Rik	Mus musculus RIKEN cDNA A430107P09 gene (A430107P09Rik), mRNA [NM_001205242]	7.25889	down	-1.73503	1.12472	chr14	54286348	+	FALSE	mm|14qC2	100568452	NM_001205242	RIKEN cDNA A430107P09 gene	chr14:54286348-54286407	GO:0008150|GO:0003674|GO:0005575	NM_001205242	Mm.404412
A_55_P2150717	Eomes	Mus musculus eomesodermin homolog (Xenopus laevis) (Eomes), transcript variant 1, mRNA [NM_010136]	10.3624	up	-4.30461	-7.6779	chr9	118394425	+	FALSE	mm|9qF3	13813	NM_010136	eomesodermin homolog (Xenopus laevis)	chr9:118394425-118394484	GO:0010468|GO:0001706|GO:0006355|GO:0007369|GO:0001707|GO:0003700|GO:0060706|GO:0045597|GO:0001824|GO:0005634|GO:0007275|GO:0060809|GO:0001829|GO:0001714|GO:0003677|GO:0030154|GO:0006351|GO:0043565|GO:0005622|GO:0007420|GO:0045944|GO:0002302|GO:0021895	NM_010136	Mm.200692
A_52_P35057	Kctd17	Mus musculus potassium channel tetramerisation domain containing 17 (Kctd17), mRNA [NM_001081367]	13.2584	up	-2.22143	-5.95027	chr15	78269442	+	FALSE	mm|15qE1	72844	NM_001081367	potassium channel tetramerisation domain containing 17	chr15:78269442-78269501	GO:0008150|GO:0005575|GO:0042802	NM_001081367	Mm.390816
A_55_P2345853	3830612M24	Mus musculus 18 days pregnant adult female placenta and extra embryonic tissue cDNA, RIKEN full-length enriched library, clone:3830612M24 product:unclassifiable, full insert sequence. [AK028406]	29.676	up	-2.9271	-7.81833	chr7	124817001	+	FALSE	mm|7qF2	330635	AK028406	hypothetical protein 3830612M24	chr7:124817001-124817060			Mm.68610
A_55_P1965975	Kynu	Mus musculus kynureninase (L-kynurenine hydrolase) (Kynu), mRNA [NM_027552]	7.08497	up	-3.87138	-6.69614	chr2	43459748	+	FALSE	mm|2qB	70789	NM_027552	kynureninase (L-kynurenine hydrolase)	chr2:43459748-43459807	GO:0006569|GO:0030429|GO:0005625|GO:0019363|GO:0034516|GO:0003824|GO:0043420|GO:0042803|GO:0005829|GO:0005739|GO:0005737|GO:0019805|GO:0016787|GO:0019441|GO:0030170|GO:0008152|GO:0034341|GO:0009435|GO:0019442	NM_027552	Mm.105278
A_55_P2039416	Sgk1	Mus musculus serum/glucocorticoid regulated kinase 1 (Sgk1), transcript variant 1, mRNA [NM_001161845]	5.55868	up	-0.786639	-3.26138	chr10	21719507	+	FALSE	mm|10qA3	20393	NM_001161845	serum/glucocorticoid regulated kinase 1	chr10:21719507-21719566	GO:0005515|GO:0043005|GO:0048471|GO:0005783|GO:0030307|GO:0006883|GO:0005634|GO:0032880|GO:0005737|GO:0000166|GO:0018105|GO:0010765|GO:0016301|GO:0051726|GO:0043402|GO:0007019|GO:0016772|GO:0031115|GO:0048037|GO:0043066|GO:0032869|GO:0007616|GO:0048156|GO:0006950|GO:0006915|GO:0043423|GO:0005524|GO:0006974|GO:0016310|GO:0004672|GO:0004674|GO:0050775|GO:0048812|GO:0008542|GO:0006468|GO:0016740	NM_001161845	Mm.28405
A_55_P1955308	Sirpb1a	Mus musculus signal-regulatory protein beta 1A (Sirpb1a), transcript variant 3, mRNA [NM_001002898]	16.1214	up	-4.02361	-8.03451	chr3	15378994	-	FALSE	mm|3qA1	320832	NM_001002898	signal-regulatory protein beta 1A	chr3:15379053-15378994	GO:0035556|GO:0003674|GO:0050766|GO:0005886	NM_001002898	Mm.425126
A_51_P209818	Prtn3	Mus musculus proteinase 3 (Prtn3), mRNA [NM_011178]	18.5702	up	0.0389156	-4.176	chr10	79343869	+	FALSE	mm|10qC1	19152	NM_011178	proteinase 3	chr10:79343869-79344685	GO:0016787|GO:0004252|GO:0030574|GO:0006508|GO:0008236|GO:0008233|GO:0003824	NM_011178	Mm.2364
A_51_P494822	Stag3	Mus musculus stromal antigen 3 (Stag3), mRNA [NM_016964]	42.9501	up	-1.26195	-6.68654	chr5	138753402	+	FALSE	mm|5qG2	50878	NM_016964	stromal antigen 3	chr5:138753402-138753461	GO:0000795|GO:0000802|GO:0005694|GO:0030893|GO:0005634|GO:0007049|GO:0007059|GO:0007126|GO:0005488|GO:0001673|GO:0007065|GO:0007066|GO:0000775	NM_016964	Mm.285609
A_66_P119034	Pla2g7	Mus musculus phospholipase A2, group VII (platelet-activating factor acetylhydrolase, plasma) (Pla2g7), mRNA [NM_013737]	5.74502	up	-5.34275	-7.86506	chr17	43749032	+	FALSE	mm|17qB3	27226	NM_013737	phospholipase A2, group VII (platelet-activating factor acetylhydrolase, plasma)	chr17:43749032-43749091	GO:0016042|GO:0006954|GO:0016787|GO:0005576|GO:0003847	NM_013737	Mm.9277
A_55_P1976898	Pnp2	Mus musculus purine-nucleoside phosphorylase 2 (Pnp2), mRNA [NM_001123371]	5.41731	up	-2.64493	-5.08251	chr14	51584365	+	FALSE	mm|14qC1	667034	NM_001123371	purine-nucleoside phosphorylase 2	chr14:51584365-51584424	GO:0008150|GO:0003674|GO:0005575	NM_001123371	Mm.482171
A_51_P419286	Batf3	Mus musculus basic leucine zipper transcription factor, ATF-like 3 (Batf3), mRNA [NM_030060]	17.7095	up	-1.51442	-5.66088	chr1	192932528	+	FALSE	mm|1qH6	381319	NM_030060	basic leucine zipper transcription factor, ATF-like 3	chr1:192932528-192932587	GO:0043565|GO:0006355|GO:0003700|GO:0046983|GO:0005634|GO:0003677|GO:0006351	NM_030060	Mm.6922
A_66_P139618	Stfa2	Mus musculus stefin A2 (Stfa2), mRNA [NM_001082545]	10.6282	up	-0.28519	-3.69502	chr16	36404032	-	FALSE	mm|16qB3	20862	NM_001082545	stefin A2	chr16:36404089-36404032	GO:0004869|GO:0010466|GO:0030414	NM_001082545	Mm.359610
A_55_P2044932	Gpr84	Mus musculus G protein-coupled receptor 84 (Gpr84), mRNA [NM_030720]	6.22174	up	-1.97815	-4.61546	chr15	103138670	-	FALSE	mm|15qF3	80910	NM_030720	G protein-coupled receptor 84	chr15:103138729-103138670	GO:0007165|GO:0016020|GO:0007186|GO:0005886|GO:0004930|GO:0004872|GO:0016021|GO:0004871	NM_030720	Mm.160369
A_51_P269166	Mmp19	Mus musculus matrix metallopeptidase 19 (Mmp19), transcript variant 1, mRNA [NM_021412]	5.079	up	-5.14157	-7.48612	chr10	128236221	+	FALSE	mm|10qD3	58223	NM_021412	matrix metallopeptidase 19	chr10:128236221-128236280	GO:0005886|GO:0005509|GO:0005578|GO:0005576|GO:0007275|GO:0031225|GO:0001525|GO:0046872|GO:0030154|GO:0031012|GO:0016787|GO:0016020|GO:0030574|GO:0008152|GO:0006508|GO:0008233|GO:0008270|GO:0004222|GO:0008237	NM_021412	Mm.131266
A_66_P135244	E130309D02Rik	Mus musculus 0 day neonate eyeball cDNA, RIKEN full-length enriched library, clone:E130302K05 product:hypothetical protein, full insert sequence. [AK053723]	5.84587	down	-7.45635	-4.90893	chr5	144077479	+	FALSE	mm|5qG2	231868	AK053723	RIKEN cDNA E130309D02 gene	chr5:144077479-144077538	GO:0008150|GO:0003674|GO:0005575
A_55_P2170847	Fbxo27	Mus musculus F-box protein 27 (Fbxo27), transcript variant 1, mRNA [NM_001163702]	8.12344	up	-4.66582	-7.68791	chr7	29484211	+	FALSE	mm|7qA3	233040	NM_001163702	F-box protein 27	chr7:29484211-29484270	GO:0030163|GO:0008150|GO:0001948|GO:0019005	NM_001163702	Mm.116116
A_55_P2263337	4930459I23Rik	Mus musculus adult male testis cDNA, RIKEN full-length enriched library, clone:4930459I23 product:unclassifiable, full insert sequence. [AK015488]	11.3334	down	-8.05161	-4.5491	chr3	96189365	+	FALSE	mm|3qF2.1	74690	AK015488	RIKEN cDNA 4930459I23 gene	chr3:96189365-96189424	GO:0008150|GO:0003674|GO:0005575		Mm.159300
A_52_P263095	Ahnak	Mus musculus AHNAK nucleoprotein (desmoyokin) (Ahnak), transcript variant 1, mRNA [NM_009643]	10.1992	up	2.38739	-0.96299	chr19	9093549	+	FALSE	mm|19qA	66395	NM_009643	AHNAK nucleoprotein (desmoyokin)	chr19:9093549-9093608	GO:0005911	NM_009643	Mm.203866
A_51_P520718	Ptger3	Mus musculus prostaglandin E receptor 3 (subtype EP3) (Ptger3), mRNA [NM_011196]	7.84458	up	-1.08426	-4.05596	chr3	157307508	+	FALSE	mm|3qH4	19218	NM_011196	prostaglandin E receptor 3 (subtype EP3)	chr3:157307508-157307567	GO:0005515|GO:0007165|GO:0007186|GO:0005886|GO:0001660|GO:0015701|GO:0007200|GO:0007188|GO:0004872|GO:0035810|GO:0007204|GO:0004957	NM_011196	Mm.30424
A_52_P387009	Egln3	Mus musculus EGL nine homolog 3 (C. elegans) (Egln3), mRNA [NM_028133]	5.61394	up	0.124837	-2.36418	chr12	55280953	-	FALSE	mm|12qC1	112407	NM_028133	EGL nine homolog 3 (C. elegans)	chr12:55281012-55280953	GO:0001666|GO:0031418|GO:0005506|GO:0006915|GO:0005634|GO:0046872|GO:0005737|GO:0042127|GO:0016491|GO:0016706|GO:0016705|GO:0016702|GO:0055114	NM_028133	Mm.133037
A_52_P423364	Fbxl7	Mus musculus F-box and leucine-rich repeat protein 7 (Fbxl7), mRNA [NM_176959]	7.56118	up	-5.02497	-7.94358	chr15	26470222	-	FALSE	mm|15qB1	448987	NM_176959	F-box and leucine-rich repeat protein 7	chr15:26470281-26470222	GO:0008150|GO:0003674|GO:0005575	NM_176959	Mm.253378
A_55_P2011220	Armcx1	Mus musculus armadillo repeat containing, X-linked 1 (Armcx1), transcript variant 1, mRNA [NM_001166377]	6.84927	up	-3.93422	-6.71016	chrX	131256231	+	FALSE	mm|XqE3	78248	NM_001166377	armadillo repeat containing, X-linked 1	chrX:131256231-131256290	GO:0008150|GO:0003674|GO:0016020|GO:0005488|GO:0016021|GO:0005575	NM_001166377	Mm.458522
A_52_P174569	Hdhd1a	Mus musculus haloacid dehalogenase-like hydrolase domain containing 1A (Hdhd1a), mRNA [NM_026108]	5.95949	up	-4.72277	-7.29795	chr18	50727879	-	FALSE	mm|18qD1	67365	NM_026108	haloacid dehalogenase-like hydrolase domain containing 1A	chr18:50727938-50727879	GO:0008150|GO:0003674|GO:0016787|GO:0008152|GO:0005575|GO:0003824|GO:0046872|GO:0009117	NM_026108	Mm.158150
A_51_P336599	Kcne3	Mus musculus potassium voltage-gated channel, Isk-related subfamily, gene 3 (Kcne3), transcript variant 2, mRNA [NM_020574]	10.0194	up	-0.30595	-3.63067	chr7	107333062	+	FALSE	mm|7qE2	57442	NM_020574	potassium voltage-gated channel, Isk-related subfamily, gene 3	chr7:107333062-107333121	GO:0005244|GO:0005267|GO:0015459|GO:0043266|GO:0016020|GO:0005249|GO:0008076|GO:0006810|GO:0034765|GO:0016021|GO:0005216|GO:0006813|GO:0071805|GO:0006811	NM_020574	Mm.282386
A_51_P177092	Stat4	Mus musculus signal transducer and activator of transcription 4 (Stat4), mRNA [NM_011487]	9.77209	up	-2.68124	-5.96991	chr1	52163802	+	FALSE	mm|1qC1.1	20849	NM_011487	signal transducer and activator of transcription 4	chr1:52163802-52163861	GO:0005515|GO:0006355|GO:0003700|GO:0008283|GO:0005509|GO:0019221|GO:0005634|GO:0003677|GO:0006351|GO:0043565|GO:0007165|GO:0005737|GO:0006468|GO:0004871	NM_011487	Mm.1550
A_51_P509573	Ccl4	Mus musculus chemokine (C-C motif) ligand 4 (Ccl4), mRNA [NM_013652]	35.7707	up	1.56465	-3.59606	chr11	83478052	+	FALSE	mm|11qC	20303	NM_013652	chemokine (C-C motif) ligand 4	chr11:83478052-83478111	GO:0005515|GO:0008009|GO:0006955|GO:0006954|GO:0006935|GO:0043114|GO:0005625|GO:0005576|GO:0005615|GO:0005125	NM_013652	Mm.244263
A_52_P32369	Hmgn3	Mus musculus high mobility group nucleosomal binding domain 3 (Hmgn3), transcript variant b, mRNA [NM_175074]	5.92841	up	-0.931923	-3.49957	chr9	83003794	-	FALSE	mm|9qE2	94353	NM_175074	high mobility group nucleosomal binding domain 3	chr9:83003853-83003794	GO:0051091|GO:0005737|GO:0045944|GO:0003682|GO:0005634|GO:0003677|GO:0000785|GO:0061178|GO:0016568	NM_175074	Mm.244426
A_51_P254656	Hdc	Mus musculus histidine decarboxylase (Hdc), mRNA [NM_008230]	13.7098	up	-4.09194	-7.86908	chr2	126419516	-	FALSE	mm|2qF1	15186	NM_008230	histidine decarboxylase	chr2:126419575-126419516	GO:0006547|GO:0006548|GO:0005625|GO:0005626|GO:0004398|GO:0016829|GO:0030425|GO:0005829|GO:0001692|GO:0008152|GO:0030170|GO:0043025|GO:0016597	NM_008230	Mm.18603
A_52_P682745	Dock4	Mus musculus dedicator of cytokinesis 4 (Dock4), mRNA [NM_172803]	26.084	up	-2.43623	-7.14132	chr12	41572977	+	FALSE	mm|12qB1	238130	NM_172803	dedicator of cytokinesis 4	chr12:41572977-41573036	GO:0030971|GO:0017124|GO:0032420|GO:0032421|GO:0005525|GO:0030165|GO:0032855|GO:0005829|GO:0005085|GO:0048365|GO:0005737|GO:0051020|GO:0016020|GO:0060326|GO:0030675	NM_172803	Mm.341423
A_51_P495581	Tlr1	Mus musculus toll-like receptor 1 (Tlr1), mRNA [NM_030682]	41.9367	up	-2.76218	-8.15232	chr5	65316115	-	FALSE	mm|5qC3.1	21897	NM_030682	toll-like receptor 1	chr5:65316174-65316115	GO:0045410|GO:0046982|GO:0005886|GO:0007250|GO:0042535|GO:0006952|GO:0031224|GO:0031410|GO:0045335|GO:0007165|GO:0006955|GO:0006954|GO:0042497|GO:0042116|GO:0016020|GO:0045087|GO:0042495|GO:0035354|GO:0004872|GO:0016021|GO:0071727|GO:0004888	NM_030682	Mm.273024
A_55_P2026360	Fbxw20	Mus musculus F-box and WD-40 domain protein 20 (Fbxw20), mRNA [NM_001008428]	5.77136	up	-5.42367	-7.95259	chr9	109119947	-	FALSE	mm|9qF2	434440	NM_001008428	F-box and WD-40 domain protein 20	chr9:109120006-109119947	GO:0008150|GO:0003674|GO:0005575	NM_001008428	Mm.450846
A_55_P2068988			9.50521	up	-1.35707	-4.60579	chr16	93630554	+	FALSE	mm|16qC4				chr16:093630554-093630613
A_55_P1998110	LOC100041550	Mus musculus hypothetical protein LOC100041550 (LOC100041550), mRNA [NM_001199332]	9.46006	up	-4.72676	-7.96861	chrY_random	8781830	-	FALSE		100041550	NM_001199332	hypothetical protein LOC100041550	chrY_random:8781889-8781830		NM_001199332	Mm.485768
A_51_P429212	Npl	Mus musculus N-acetylneuraminate pyruvate lyase (Npl), mRNA [NM_028749]	13.4176	up	-1.97988	-5.72594	chr1	155350652	-	FALSE	mm|1qG3	74091	NM_028749	N-acetylneuraminate pyruvate lyase	chr1:155356265-155350652	GO:0005737|GO:0008747|GO:0005975|GO:0008152|GO:0005575|GO:0003824|GO:0016829	NM_028749	Mm.24887
A_55_P2038770	Fam49a	Mus musculus family with sequence similarity 49, member A (Fam49a), transcript variant 1, mRNA [NM_029758]	12.9601	up	-3.15866	-6.85466	chr12	12366024	+	FALSE	mm|12qA1.1	76820	NM_029758	family with sequence similarity 49, member A	chr12:12366024-12366083	GO:0005622|GO:0008150|GO:0003674	NM_029758	Mm.440802
A_52_P463518	Cd200r1	Mus musculus CD200 receptor 1 (Cd200r1), mRNA [NM_021325]	18.9698	up	-3.70923	-7.95486	chr16	44794670	+	FALSE	mm|16qB4	57781	NM_021325	CD200 receptor 1	chr16:44794670-44794729	GO:0005515|GO:0007165|GO:0016020|GO:0005886|GO:0004872|GO:0016021|GO:0009897	NM_021325	Mm.416152
A_55_P2138104		predicted gene 10720 [Source:MGI Symbol;Acc:MGI:3641687] [ENSMUST00000099050]	6.71349	up	1.85145	-0.895609	chr9	3004200	+	FALSE	mm|9qA1		AK089567		chr9:3004200-3004259
A_55_P2083889	Pea15a	Mus musculus phosphoprotein enriched in astrocytes 15A (Pea15a), transcript variant 2, mRNA [NM_011063]	20.405	up	-1.58331	-5.93416	chr1	174127584	-	FALSE	mm|1qH3	18611	NM_011063	phosphoprotein enriched in astrocytes 15A	chr1:174127643-174127584	GO:0035556|GO:0005737|GO:0005875|GO:0046325|GO:0005080|GO:0006810|GO:0008643|GO:0006915|GO:0005624|GO:0042981|GO:0006916	NM_011063	Mm.544
A_55_P1962918	Mnda	Mus musculus myeloid cell nuclear differentiation antigen (Mnda), mRNA [NM_001033450]	36.1968	up	-0.804387	-5.98218	chr1	175826600	-	FALSE	mm|1qH3	381308	NM_001033450	myeloid cell nuclear differentiation antigen	chr1:175826659-175826600	GO:0008150|GO:0003674|GO:0016607|GO:0034399|GO:0005634	NM_001033450	Mm.485772
A_55_P2187030		predicted gene, 16901 [Source:MGI Symbol;Acc:MGI:4439825] [ENSMUST00000103537]	8.41611	up	-1.06767	-4.14082	chr12	116831501	-	FALSE	mm|12qF2		AF296436		chr12:116831560-116831501			Mm.436242
A_51_P309920	Itga8	Mus musculus integrin alpha 8 (Itga8), mRNA [NM_001001309]	10.7654	up	-2.65947	-6.0878	chr2	12028462	-	FALSE	mm|2qA1	241226	NM_001001309	integrin alpha 8	chr2:12028521-12028462	GO:0001656|GO:0008305|GO:0042472|GO:0005886|GO:0045177|GO:0014069|GO:0007275|GO:0030154|GO:0007399|GO:0032591|GO:0016020|GO:0030198|GO:0007229|GO:0030030|GO:0043204|GO:0004872|GO:0007613|GO:0016021|GO:0007155|GO:0030511	NM_001001309	Mm.329997
A_55_P1972040	Nox4	Mus musculus NADPH oxidase 4 (Nox4), mRNA [NM_015760]	7.71647	up	-5.05259	-8.00053	chr7	94547025	+	FALSE	mm|7qD3	50490	NM_015760	NADPH oxidase 4	chr7:94547025-94547084	GO:0051897|GO:0048471|GO:0050664|GO:0008285|GO:0030054|GO:0005886|GO:0005783|GO:2000573|GO:0045453|GO:0050660|GO:0006801|GO:0071944|GO:0014911|GO:0005739|GO:0016324|GO:0016175|GO:0043406|GO:0016174|GO:0070374|GO:0042554|GO:0001725|GO:0043065|GO:0005506|GO:0007569|GO:0072593|GO:0009055|GO:0035051|GO:0000902|GO:0016020|GO:0051496|GO:0016491|GO:0016021|GO:0043020|GO:2000379|GO:0005925|GO:0055114	NM_015760	Mm.31748
A_52_P650855	Myo1d	Mus musculus myosin ID (Myo1d), mRNA [NM_177390]	5.94189	up	-4.32152	-6.89244	chr11	80295717	-	FALSE	mm|11qB5	338367	NM_177390	myosin ID	chr11:80295776-80295717	GO:0005516|GO:0003774|GO:0000166|GO:0003779|GO:0016459|GO:0005524	NM_177390	Mm.151948
A_51_P516085	Dntt	Mus musculus deoxynucleotidyltransferase, terminal (Dntt), transcript variant 1, mRNA [NM_009345]	7.54253	down	-4.83334	-1.91829	chr19	41133936	+	FALSE	mm|19qC3	21673	NM_009345	deoxynucleotidyltransferase, terminal	chr19:41133936-41133995	GO:0005622|GO:0005737|GO:0003887|GO:0016779|GO:0005634|GO:0006259|GO:0003824|GO:0006304|GO:0003912|GO:0003677|GO:0046872|GO:0016740	NM_009345	Mm.25620
A_55_P1992555	Gys2	Mus musculus glycogen synthase 2 (Gys2), mRNA [NM_145572]	5.81266	up	-5.39764	-7.93683	chr6	142371157	-	FALSE	mm|6qG2	232493	NM_145572	glycogen synthase 2	chr6:142371216-142371157	GO:0005978|GO:0005977|GO:0005625|GO:0004373|GO:0005536	NM_145572	Mm.275975
A_55_P2026270	Cfi	Mus musculus complement component factor i (Cfi), mRNA [NM_007686]	13.5108	down	-8.06819	-4.31214	chr3	129578165	+	FALSE	mm|3qG3	12630	NM_007686	complement component factor i	chr3:129578165-129578224	GO:0016787|GO:0008152|GO:0008236|GO:0008233	NM_007686	Mm.117180
A_55_P2101585	Cd55	Mus musculus CD55 antigen (Cd55), mRNA [NM_010016]	15.2803	down	-4.54953	-0.615936	chr1	132335716	-	FALSE	mm|1qE4	13136	NM_010016	CD55 antigen	chr1:132335775-132335716	GO:0045916|GO:0004857|GO:0016324|GO:0016020|GO:0005886|GO:0045087|GO:0006958|GO:0045121|GO:0031225|GO:0043086|GO:0007204|GO:0009897	NM_010016	Mm.101591
A_52_P108850	St8sia1	Mus musculus ST8 alpha-N-acetyl-neuraminide alpha-2,8-sialyltransferase 1 (St8sia1), mRNA [NM_011374]	8.94988	up	-2.68213	-5.84399	chr6	142770079	-	FALSE	mm|6qG3	20449	NM_011374	ST8 alpha-N-acetyl-neuraminide alpha-2,8-sialyltransferase 1	chr6:142770138-142770079	GO:0034605|GO:0008373|GO:0008284|GO:0005794|GO:0016020|GO:0016757|GO:0008152|GO:0006486|GO:0016021|GO:0016740	NM_011374	Mm.260838
A_66_P115541	Sox12	Mus musculus SRY-box containing gene 12 (Sox12), mRNA [NM_011438]	15.0335	up	-4.20176	-8.11186	chr2	152220036	-	FALSE	mm|2qG3	20667	NM_011438	SRY-box containing gene 12	chr2:152220095-152220036	GO:0006355|GO:0001105|GO:0001077|GO:0000976|GO:0032993|GO:0021510|GO:0045944|GO:0005634|GO:0065004|GO:0003677|GO:0006351	NM_011438	Mm.28424
A_55_P1971840	Muc13	Mus musculus mucin 13, epithelial transmembrane (Muc13), mRNA [NM_010739]	11.9137	down	-4.94579	-1.37124	chr16	33819909	+	FALSE	mm|16qB3	17063	NM_010739	mucin 13, epithelial transmembrane	chr16:33819909-33819968	GO:0016020|GO:0005886|GO:0005576|GO:0016021	NM_010739	Mm.3177
A_55_P1981704	Ccdc113	Mus musculus coiled-coil domain containing 113 (Ccdc113), mRNA [NM_172914]	34.27	down	-6.91742	-1.81855	chr8	98082729	+	FALSE	mm|8qD1	244608	NM_172914	coiled-coil domain containing 113	chr8:98082729-98082788	GO:0043234|GO:0008150|GO:0003674	NM_172914	Mm.248902
A_66_P132249	Akr1c13	Mus musculus aldo-keto reductase family 1, member C13 (Akr1c13), mRNA [NM_013778]	11.5898	up	-1.52535	-5.06014	chr13	4204668	+	FALSE	mm|13qA1	27384	NM_013778	aldo-keto reductase family 1, member C13	chr13:4204668-4204727	GO:0004033|GO:0006805|GO:0016491|GO:0055114	NM_013778	Mm.27447
A_55_P2365928		predicted gene 14873 [Source:MGI Symbol;Acc:MGI:3713047] [ENSMUST00000136531]	5.43811	up	-5.30936	-7.75246	chr17	47836920	-	FALSE	mm|17qC		XR_105846		chr17:47836979-47836920		XR_105846	Mm.392746
A_55_P2160291	Olfm1	Mus musculus olfactomedin 1 (Olfm1), transcript variant 2, mRNA [NM_001038612]	10.3625	up	-3.09599	-6.46929	chr2	28069892	+	FALSE	mm|2qA3	56177	NM_001038612	olfactomedin 1	chr2:28069892-28069951	GO:0005515|GO:0005783|GO:0007275|GO:0051259|GO:0005615	NM_001038612	Mm.43278
A_55_P2021266	Hpse	Mus musculus heparanase (Hpse), mRNA [NM_152803]	6.71762	up	-1.13885	-3.8868	chr5	101108565	-	FALSE	mm|5qE4	15442	NM_152803	heparanase	chr5:101108624-101108565	GO:0005975|GO:0043169|GO:0030305|GO:0005578|GO:0005576|GO:0005634|GO:0003824|GO:0005764|GO:0016020|GO:0016787|GO:0016798|GO:0008152|GO:0007155	NM_152803	Mm.265786
A_55_P2066230	Hck	Mus musculus hemopoietic cell kinase (Hck), transcript variant 1, mRNA [NM_001172117]	20.871	up	2.80518	-1.57825	chr2	152977080	+	FALSE	mm|2qH1	15162	NM_001172117	hemopoietic cell kinase	chr2:152977080-152977139	GO:0006909|GO:0050830|GO:0005524|GO:0016310|GO:0004672|GO:0000166|GO:0016020|GO:0016301|GO:0005901|GO:0006468|GO:0004713|GO:0004715|GO:0016740|GO:0016772	NM_001172117	Mm.715
A_51_P384148	Ryk	Mus musculus receptor-like tyrosine kinase (Ryk), transcript variant 1, mRNA [NM_013649]	6.30358	up	-4.85768	-7.51385	chr9	102809441	+	FALSE	mm|9qF1	20187	NM_013649	receptor-like tyrosine kinase	chr9:102809441-102809501	GO:0005515|GO:0017147|GO:0005886|GO:0071679|GO:0048843|GO:0048705|GO:0005634|GO:0007409|GO:0031175|GO:0005109|GO:0005737|GO:0000166|GO:0007411|GO:0016301|GO:0030182|GO:0004872|GO:0016055|GO:0016772|GO:0042813|GO:0050919|GO:0005624|GO:0005524|GO:0022038|GO:0007165|GO:0016310|GO:0004672|GO:0016020|GO:0006468|GO:0004713|GO:0016021|GO:0043410|GO:0004714|GO:0016740|GO:0004888	NM_013649	Mm.335391
A_55_P2081105	AI607873	Mus musculus expressed sequence AI607873 (AI607873), mRNA [NM_001204910]	194.695	up	-0.34761	-7.95268	chr1	175653663	-	FALSE	mm|1qH3	226691	NM_001204910	expressed sequence AI607873	chr1:175653722-175653663	GO:0008150|GO:0003674|GO:0005575	NM_001204910	Mm.440876
A_55_P2030160	Tcf7l2	Mus musculus transcription factor 7-like 2, T-cell specific, HMG-box (Tcf7l2), transcript variant 4, mRNA [NM_001142920]	5.39763	up	-3.96649	-6.39882	chr19	55994029	+	FALSE	mm|19qD2	21416	NM_001142920	transcription factor 7-like 2, T-cell specific, HMG-box	chr19:55994029-55994088	GO:0005515|GO:0003700|GO:0008013|GO:0044212|GO:0045599|GO:0010909|GO:0032993|GO:0030538|GO:0045444|GO:0032024|GO:0016055|GO:0050679|GO:0019901|GO:0045295|GO:0000122|GO:0048641|GO:0005654|GO:0043588|GO:0045893|GO:0045892|GO:0008134|GO:0051897|GO:0008283|GO:0021983|GO:0035257|GO:0005634|GO:0030282|GO:0035411|GO:0043433|GO:0005829|GO:0032092|GO:0044334|GO:0046827|GO:0030514|GO:0045944|GO:0031641|GO:…	NM_001142920	Mm.139815
A_55_P2052824	Lrrc14b	Mus musculus leucine rich repeat containing 14B (Lrrc14b), mRNA [NM_001033042]	13.358	down	-7.73386	-3.99423	chr13	74497030	-	FALSE	mm|13qC1	432779	NM_001033042	leucine rich repeat containing 14B	chr13:74497089-74497030	GO:0008150|GO:0003674|GO:0005575	NM_001033042	Mm.324679
A_55_P2299976	1700022A22Rik	Mus musculus adult male testis cDNA, RIKEN full-length enriched library, clone:4933413D07 product:unclassifiable, full insert sequence. [AK016801]	5.81068	down	-8.03033	-5.49163	chr15	46168835	+	FALSE	mm|15qB3.3	71120	AK016801	RIKEN cDNA 1700022A22 gene	chr15:46168835-46168894	GO:0008150|GO:0003674|GO:0005575		Mm.158571
A_55_P2077368	Dpep2	Mus musculus dipeptidase 2 (Dpep2), mRNA [NM_176913]	32.7684	up	-3.04444	-8.07867	chr8	108513351	-	FALSE	mm|8qD3	319446	NM_176913	dipeptidase 2	chr8:108513410-108513351	GO:0005575|GO:0031225|GO:0016805|GO:0046872|GO:0016020|GO:0016787|GO:0008152|GO:0006508|GO:0008235|GO:0008233|GO:0008239|GO:0008237|GO:0008238	NM_176913	Mm.248357
A_51_P387379	Tshz3	Mus musculus teashirt zinc finger family member 3 (Tshz3), mRNA [NM_172298]	6.57126	up	-0.347366	-3.06354	chr7	37557872	+	FALSE	mm|7qB2	243931	NM_172298	teashirt zinc finger family member 3	chr7:37557872-37557931	GO:0005515|GO:0001657|GO:0003700|GO:0030324|GO:0005634|GO:0042995|GO:0046872|GO:0030426|GO:0005739|GO:0005622|GO:0002087|GO:0050881|GO:0072195|GO:0048745|GO:0060993|GO:0051152|GO:0006355|GO:0007275|GO:0072105|GO:0003677|GO:0001701|GO:0006351|GO:0072193|GO:0043565|GO:0003682|GO:0008270|GO:0050975|GO:0045892	NM_172298	Mm.44141
A_55_P1977943	Insm1	Mus musculus insulinoma-associated 1 (Insm1), mRNA [NM_016889]	16.2226	up	-1.11023	-5.13016	chr2	146050603	+	FALSE	mm|2qG1	53626	NM_016889	insulinoma-associated 1	chr2:146050603-146050662	GO:0005622|GO:0031018|GO:0008270|GO:0005634|GO:0003676|GO:0046872|GO:0030154	NM_016889	Mm.379070
A_52_P216672	Klk8	Mus musculus kallikrein related-peptidase 8 (Klk8), mRNA [NM_008940]	20.3246	up	-0.478913	-4.82407	chr7	51057455	+	FALSE	mm|7qB4	259277	NM_008940	kallikrein related-peptidase 8	chr7:51057455-51057514	GO:0008219|GO:0004252|GO:0009611|GO:0005576|GO:0003824|GO:0043616|GO:0005615|GO:0005737|GO:0050808|GO:0048681|GO:0016787|GO:0050807|GO:0048812|GO:0008152|GO:0006508|GO:0008236|GO:0007613|GO:0008233|GO:0031642	NM_008940	Mm.458023
A_55_P2047310	Pdgfb	Mus musculus platelet derived growth factor, B polypeptide (Pdgfb), mRNA [NM_011057]	87.8197	up	-1.25812	-7.71459	chr15	79826376	-	FALSE	mm|15qE1	18591	NM_011057	platelet derived growth factor, B polypeptide	chr15:79826435-79826376	GO:0043498|GO:0043499|GO:0050730|GO:0005518|GO:0042803|GO:0042802|GO:0007507|GO:0018105|GO:0043552|GO:0051781|GO:0007179|GO:0035793|GO:0030336|GO:0030335|GO:0046982|GO:0009986|GO:0045743|GO:0048407|GO:0010512|GO:0045740|GO:0001892|GO:0018108|GO:0014068|GO:0045840|GO:0005161|GO:0043536|GO:0030031|GO:0045893|GO:0008083|GO:0045892|GO:0060445|GO:0010544|GO:0008284|GO:0030036|GO:0006929|GO:0045737|GO:…	NM_011057	Mm.144089
A_66_P115034	Bend5	Mus musculus BEN domain containing 5 (Bend5), transcript variant 1, mRNA [NM_026279]	23.4361	up	-3.03177	-7.58243	chr4	111132778	+	FALSE	mm|4qD1	67621	NM_026279	BEN domain containing 5	chr4:111132778-111132837	GO:0008150|GO:0003674|GO:0005794	NM_026279	Mm.45533
A_52_P302345	Cyp4v3	Mus musculus cytochrome P450, family 4, subfamily v, polypeptide 3 (Cyp4v3), mRNA [NM_133969]	8.07958	up	-4.04145	-7.05573	chr8	46391395	-	FALSE	mm|8qB1.1	102294	NM_133969	cytochrome P450, family 4, subfamily v, polypeptide 3	chr8:46391454-46391395	GO:0005506|GO:0005783|GO:0009055|GO:0005575|GO:0046872|GO:0003674|GO:0004497|GO:0008150|GO:0016020|GO:0016491|GO:0016021|GO:0016705|GO:0055114|GO:0020037	NM_133969	Mm.245297
A_55_P2045755	Plcxd2	Mus musculus phosphatidylinositol-specific phospholipase C, X domain containing 2 (Plcxd2), mRNA [NM_001134480]	6.05882	up	-2.27062	-4.86966	chr16	45959393	-	FALSE	mm|16qB5	433022	NM_001134480	phosphatidylinositol-specific phospholipase C, X domain containing 2	chr16:45959452-45959393	GO:0008150|GO:0003674|GO:0005575	NM_001134480	Mm.380993
A_55_P2365710	B130046B21Rik	PREDICTED: Mus musculus RIKEN cDNA B130046B21 gene (B130046B21Rik), miscRNA [XR_105701]	6.20132	up	-5.38023	-8.01281	chr15	98646440	+	FALSE	mm|15qF1	100049164	XR_105701	RIKEN cDNA B130046B21 gene	chr15:98646440-98646499	GO:0008150|GO:0003674|GO:0005575	XR_105701	Mm.457894
A_51_P499838	Bst1	Mus musculus bone marrow stromal cell antigen 1 (Bst1), mRNA [NM_009763]	5.34314	up	-3.38516	-5.80285	chr5	44233465	+	FALSE	mm|5qB3	12182	NM_009763	bone marrow stromal cell antigen 1	chr5:44233465-44233524	GO:0003953|GO:0016787|GO:0016020|GO:0005886|GO:0005488|GO:0008152|GO:0031225	NM_009763	Mm.246332
A_52_P51078	Ctsh	Mus musculus cathepsin H (Ctsh), mRNA [NM_007801]	90.0387	up	1.76113	-4.73134	chr9	89970828	+	FALSE	mm|9qE3.1	13036	NM_007801	cathepsin H	chr9:89970828-89970887	GO:0031648|GO:0004197|GO:0030984|GO:0016787|GO:0006508|GO:0008233|GO:0008234|GO:0032403	NM_007801	Mm.2277
A_55_P1963017	Stfa1	Mus musculus stefin A1 (Stfa1), mRNA [NM_001082543]	791.558	up	1.70543	-7.92312	chr16	36285398	+	FALSE	mm|16qB3	20861	NM_001082543	stefin A1	chr16:36285398-36285457	GO:0005622|GO:0005737|GO:0004869|GO:0004866|GO:0010466|GO:0030414	NM_001082543	Mm.327618
A_55_P2049572	Pld2	Mus musculus phospholipase D2 (Pld2), mRNA [NM_008876]	14.1155	up	-0.382947	-4.20216	chr11	70371548	+	FALSE	mm|11qB3	18806	NM_008876	phospholipase D2	chr11:70371548-70371607	GO:0014070|GO:0042542|GO:0005886|GO:0043434|GO:0005634|GO:0004630|GO:0031526|GO:0003824|GO:0031175|GO:0007154|GO:0005080|GO:0001666|GO:0005794|GO:0030335|GO:0014068|GO:0006898|GO:0002031|GO:0030027|GO:0045785|GO:0043306|GO:0016042|GO:0042383|GO:0016020|GO:0016787|GO:0070290|GO:0005901|GO:0048260|GO:0008152|GO:0035091|GO:0009395	NM_008876	Mm.260177
A_66_P109986	Cd33	Mus musculus CD33 antigen (Cd33), transcript variant 1, mRNA [NM_001111058]	7.83068	up	-0.801888	-3.77103	chr7	50783849	-	FALSE	mm|7qB4	12489	NM_001111058	CD33 antigen	chr7:50783908-50783849	GO:0016020|GO:0005886|GO:0005529|GO:0016021|GO:0007155|GO:0009897	NM_001111058	Mm.140157
A_55_P1987650	Ctnnd2	Mus musculus catenin (cadherin associated protein), delta 2 (Ctnnd2), mRNA [NM_008729]	32.1047	up	0.355852	-4.64886	chr15	30959013	+	FALSE	mm|15qB2	18163	NM_008729	catenin (cadherin associated protein), delta 2	chr15:30959013-30959072	GO:0006355|GO:0030054|GO:0048167|GO:0005488|GO:0014069|GO:0007275|GO:0005634|GO:0007612|GO:0019717|GO:0007155|GO:0006351|GO:0001763	NM_008729	Mm.321648
A_55_P2018934	Emr1	Mus musculus EGF-like module containing, mucin-like, hormone receptor-like sequence 1 (Emr1), mRNA [NM_010130]	6.00135	up	0.435604	-2.14968	chr17	57620350	+	FALSE	mm|17qD	13733	NM_010130	EGF-like module containing, mucin-like, hormone receptor-like sequence 1	chr17:57620350-57620409	GO:0005886|GO:0004930|GO:0005509|GO:0007165|GO:0007186|GO:0016020|GO:0007218|GO:0004872|GO:0004871|GO:0016021|GO:0007166|GO:0009897|GO:0004888	NM_010130	Mm.2254
A_51_P417251	6330403K07Rik	Mus musculus RIKEN cDNA 6330403K07 gene (6330403K07Rik), mRNA [NM_134022]	8.33746	up	-4.90829	-7.9679	chr11	70845694	-	FALSE	mm|11qB4	103712	NM_134022	RIKEN cDNA 6330403K07 gene	chr11:70845753-70845694	GO:0008150|GO:0003674|GO:0005575	NM_134022	Mm.27768
A_55_P2113905	Zfp583	Mus musculus zinc finger protein 583 (Zfp583), mRNA [NM_001033249]	5.48937	up	-5.55762	-8.01426	chr7	6268060	-	FALSE	mm|7qA1	213011	NM_001033249	zinc finger protein 583	chr7:6268119-6268060	GO:0005622|GO:0008150|GO:0003674|GO:0006355|GO:0008270|GO:0005634|GO:0005575|GO:0003676|GO:0003677|GO:0046872|GO:0006351	NM_001033249	Mm.333558
A_52_P156190	Ednra	Mus musculus endothelin receptor type A (Ednra), mRNA [NM_010332]	20.4936	up	-3.41394	-7.77104	chr8	80186985	-	FALSE	mm|8qC1	13617	NM_010332	endothelin receptor type A	chr8:80187044-80186985	GO:0005515|GO:0001599|GO:0051928|GO:0007507|GO:0014032|GO:0015758|GO:0051482|GO:0032496|GO:0070374|GO:0050678|GO:0031965|GO:0004930|GO:0043278|GO:0043084|GO:0001701|GO:0007186|GO:0090023|GO:0045121|GO:0008284|GO:0090184|GO:0005886|GO:0042482|GO:0030818|GO:0007266|GO:0007204|GO:0048144|GO:0007205|GO:0042310|GO:0004872|GO:0004871|GO:0051281|GO:0014824|GO:0001666|GO:0001569|GO:0043066|GO:0007585|GO:…	NM_010332	Mm.283168
A_55_P2063422	Csmd1	Mus musculus CUB and Sushi multiple domains 1 (Csmd1), mRNA [NM_053171]	5.17106	down	-7.01835	-4.64789	chr8	15892561	-	FALSE	mm|8qA1.1	94109	NM_053171	CUB and Sushi multiple domains 1	chr8:15892620-15892561	GO:0008150|GO:0003674|GO:0016020|GO:0016021|GO:0005575	NM_053171	Mm.436988
A_55_P1964648	Btla	Mus musculus B and T lymphocyte associated (Btla), transcript variant 1, mRNA [NM_001037719]	61.8565	up	-1.9828	-7.93366	chr16	45252905	+	FALSE	mm|16qB5	208154	NM_001037719	B and T lymphocyte associated	chr16:45252905-45252964	GO:0005515|GO:0005886|GO:0046642|GO:0030889|GO:0042130|GO:0007165|GO:0002768|GO:0016020|GO:0005887|GO:0004872|GO:0016021|GO:0007166|GO:0009897	NM_001037719	Mm.38199
A_51_P413866	Cfb	Mus musculus complement factor B (Cfb), transcript variant 1, mRNA [NM_008198]	12.0556	up	-4.41832	-8.00996	chr17	34993502	-	FALSE	mm|17qB1	14962	NM_008198	complement factor B	chr17:34993858-34993502	GO:0004252|GO:0005886|GO:0008283|GO:0005576|GO:0003824|GO:0005615|GO:0006957|GO:0006956|GO:0016787|GO:0045087|GO:0006508|GO:0008236|GO:0008233	NM_008198	Mm.653
A_51_P227392	Rhou	Mus musculus ras homolog gene family, member U (Rhou), mRNA [NM_133955]	5.35268	up	-3.06488	-5.48514	chr8	126187714	+	FALSE	mm|8qE2	69581	NM_133955	ras homolog gene family, member U	chr8:126187714-126187773	GO:0030054|GO:0030036|GO:0005794|GO:0005886|GO:0007264|GO:0008360|GO:0003924|GO:0042995|GO:0005575|GO:0005525|GO:0046872|GO:0005622|GO:0006184|GO:0000082|GO:0016601|GO:0000166|GO:0016020	NM_133955	Mm.168257
A_51_P173692	Lingo4	Mus musculus leucine rich repeat and Ig domain containing 4 (Lingo4), mRNA [NM_177250]	11.498	up	-2.55918	-6.08249	chr3	94208322	+	FALSE	mm|3qF2.1	320747	NM_177250	leucine rich repeat and Ig domain containing 4	chr3:94208322-94208381	GO:0008150|GO:0003674|GO:0016020|GO:0016021|GO:0005575	NM_177250	Mm.213001
A_52_P382076	4930579D07Rik	PREDICTED: Mus musculus RIKEN cDNA 4930579D07 gene (4930579D07Rik), partial miscRNA [XR_105814]	5.34415	up	-5.71735	-8.13531	chr17	4851897	-	FALSE	mm|17qA1	75934	XR_105814	RIKEN cDNA 4930579D07 gene	chr17:4851956-4851897	GO:0008150|GO:0003674|GO:0005575	XR_105814	Mm.410801
A_55_P2131658			6.39114	up	-5.46047	-8.13654	chr7	15385288	-	FALSE	mm|7qA1				chr7:015385347-015385288
A_55_P1995537	Mpo	Mus musculus myeloperoxidase (Mpo), nuclear gene encoding mitochondrial protein, mRNA [NM_010824]	10.7695	up	4.00244	0.573559	chr11	87617840	+	FALSE	mm|11qC	17523	NM_010824	myeloperoxidase	chr11:87617840-87617899	GO:0050830|GO:0050832|GO:0005625|GO:0001878|GO:0005615|GO:0002679|GO:0005739|GO:0004601|GO:0034374|GO:0019430|GO:0044130|GO:0030141|GO:0042744|GO:0006979|GO:0008201|GO:0055114|GO:0002149	NM_010824	Mm.4668
A_55_P2004777	Micall2	Mus musculus MICAL-like 2 (Micall2), mRNA [NM_174850]	5.06842	up	-1.11662	-3.45816	chr5	140182784	-	FALSE	mm|5qG2	231830	NM_174850	MICAL-like 2	chr5:140182843-140182784	GO:0005515|GO:0005923|GO:0032432|GO:0046872|GO:0006897	NM_174850	Mm.240510
A_55_P2060184	Lamtor3	Mus musculus late endosomal/lysosomal adaptor, MAPK and MTOR activator 3 (Lamtor3), mRNA [NM_019920]	5.37006	down	4.33112	6.75606	chr3	137591446	+	FALSE	mm|3qG3	56692	NM_019920	late endosomal/lysosomal adaptor, MAPK and MTOR activator 3	chr3:137591446-137591505	GO:0071986|GO:0019209|GO:0000186|GO:0032008|GO:0071230|GO:0005770|GO:0034613|GO:0042327	NM_019920	Mm.331392
A_55_P2126951	Zfp467	Mus musculus zinc finger protein 467 (Zfp467), transcript variant 4, mRNA [NM_001085417]	7.34561	up	-2.46195	-5.33883	chr6	48391971	-	FALSE	mm|6qB2.3	68910	NM_001085417	zinc finger protein 467	chr6:48392030-48391971	GO:0005622|GO:0005515|GO:0006355|GO:0008270|GO:0005634|GO:0003676|GO:0003677|GO:0046872|GO:0006351	NM_001085417	Mm.2464
A_55_P2129658	Smad6	Mus musculus MAD homolog 6 (Drosophila) (Smad6), mRNA [NM_008542]	15.9119	up	-4.08643	-8.07847	chr9	63800980	-	FALSE	mm|9qC	17130	NM_008542	MAD homolog 6 (Drosophila)	chr9:63801039-63800980	GO:0005515|GO:0010991|GO:0003700|GO:0030617|GO:0005634|GO:0060394|GO:0005829|GO:0005622|GO:0030514|GO:0070698|GO:0006955|GO:0007179|GO:0043154|GO:0030512|GO:0031625|GO:0005667|GO:0006355|GO:0043066|GO:0070410|GO:0070411|GO:0070412|GO:0030509|GO:0007352|GO:0006351|GO:0034713|GO:0045750	NM_008542	Mm.325757
A_51_P233160	Lysmd2	Mus musculus LysM, putative peptidoglycan-binding, domain containing 2 (Lysmd2), mRNA [NM_027309]	17.6617	up	-0.418573	-4.56112	chr9	75485278	+	FALSE	mm|9qD	70082	NM_027309	LysM, putative peptidoglycan-binding, domain containing 2	chr9:75485278-75485337	GO:0008150|GO:0003674|GO:0005575	NM_027309	Mm.19119
A_52_P203560	Fzd10	Mus musculus frizzled homolog 10 (Drosophila) (Fzd10), mRNA [NM_175284]	12.1863	up	-4.46919	-8.07637	chr5	129109798	+	FALSE	mm|5qG1.3	93897	NM_175284	frizzled homolog 10 (Drosophila)	chr5:129109798-129109857	GO:0008406|GO:0017147|GO:0005886|GO:0034259|GO:0042995|GO:0009790|GO:0032855|GO:0005737|GO:0032956|GO:0004872|GO:0043507|GO:0004871|GO:0016055|GO:0060070|GO:0001944|GO:0042813|GO:0006357|GO:0009986|GO:0004930|GO:0007275|GO:0030165|GO:0007165|GO:0007186|GO:0016020|GO:0007420|GO:0016021|GO:0007166|GO:0004888|GO:0035567	NM_175284	Mm.197628
A_55_P2030883	Esr1	Mus musculus estrogen receptor 1 (alpha) (Esr1), mRNA [NM_007956]	6.37479	down	-6.38559	-3.71321	chr10	5489352	-	FALSE	mm|10qA1	13982	NM_007956	estrogen receptor 1 (alpha)	chr10:5489411-5489352	GO:0005515|GO:0043627|GO:0003700|GO:0008013|GO:0060750|GO:0003707|GO:0032403|GO:0002064|GO:0070374|GO:0004879|GO:0043526|GO:0005496|GO:0032355|GO:0045885|GO:0045742|GO:0071391|GO:0060687|GO:0001547|GO:0043234|GO:0045839|GO:0048386|GO:0044429|GO:0016049|GO:0008270|GO:0019899|GO:0008134|GO:0043005|GO:0060065|GO:0048471|GO:0005886|GO:0060068|GO:0042562|GO:0030284|GO:0005634|GO:0048146|GO:0046872|GO:…	NM_007956	Mm.9213
A_55_P1988872	Bcl11a	Mus musculus B-cell CLL/lymphoma 11A (zinc finger protein) (Bcl11a), transcript variant 4, mRNA [NM_001242934]	39.9608	up	1.28939	-4.03113	chr11	24068355	+	FALSE	mm|11qA3.2	14025	NM_001242934	B-cell CLL/lymphoma 11A (zinc finger protein)	chr11:24068355-24068414	GO:0005515|GO:0006355|GO:0046982|GO:0003714|GO:0016925|GO:0005634|GO:0003676|GO:0048671|GO:0046872|GO:0006351|GO:0048672|GO:0005622|GO:0005737|GO:0030217|GO:0030517|GO:0045944|GO:0030183|GO:0010629|GO:0010976|GO:0050773|GO:0010977|GO:0008270|GO:2000171	NM_001242934	Mm.277235
A_51_P497882	Creb3l4	Mus musculus cAMP responsive element binding protein 3-like 4 (Creb3l4), mRNA [NM_030080]	5.08613	up	-5.74196	-8.08853	chr3	90041531	-	FALSE	mm|3qF1	78284	NM_030080	cAMP responsive element binding protein 3-like 4	chr3:90041590-90041531	GO:0006986|GO:0006355|GO:0003700|GO:0005783|GO:0005634|GO:0007275|GO:0007283|GO:0031410|GO:0003677|GO:0006351|GO:0030154|GO:0043565|GO:0016020|GO:0045944|GO:0046983|GO:0016021	NM_030080	Mm.299952
A_55_P2188797	7120432I05Rik	Mus musculus 2 days neonate sympathetic ganglion cDNA, RIKEN full-length enriched library, clone:7120432I05 product:hypothetical protein, full insert sequence. [AK148667]	39.8403	down	-7.49502	-2.17887	chr16	81263756	+	FALSE	mm|16qC3.3	100038676	AK148667	RIKEN cDNA 7120432I05 gene	chr16:81263756-81263815	GO:0008150|GO:0003674|GO:0005575
A_51_P448664	Tbxas1	Mus musculus thromboxane A synthase 1, platelet (Tbxas1), mRNA [NM_011539]	21.9985	up	-3.55734	-8.01668	chr6	39034356	+	FALSE	mm|6qB1	21391	NM_011539	thromboxane A synthase 1, platelet	chr6:39034356-39034415	GO:0005792|GO:0008610|GO:0005506|GO:0005783|GO:0009055|GO:0046872|GO:0004497|GO:0045907|GO:0030644|GO:0001516|GO:0016020|GO:0008152|GO:0016491|GO:0006633|GO:0016705|GO:0016021|GO:0016853|GO:0004796|GO:0055114|GO:0020037	NM_011539	Mm.4054
A_52_P299771	Bcl2a1c	Mus musculus B-cell leukemia/lymphoma 2 related protein A1c (Bcl2a1c), mRNA [NM_007535]	40.5594	up	-1.82363	-7.16559	chr9	114239422	+	FALSE	mm|9qF3	12046	NM_007535	B-cell leukemia/lymphoma 2 related protein A1c	chr9:114239422-114239481	GO:0008150|GO:0003674|GO:0005575	NM_007535	Mm.378887
A_52_P552194	Il13ra1	Mus musculus interleukin 13 receptor, alpha 1 (Il13ra1), mRNA [NM_133990]	5.50165	up	-5.67615	-8.13602	chrX	33710154	+	FALSE	mm|XqA3.3	16164	NM_133990	interleukin 13 receptor, alpha 1	chrX:33710154-33710213	GO:0004896|GO:0016020|GO:0030890|GO:0002639|GO:0016515|GO:0035772|GO:0004872|GO:0016021	NM_133990	Mm.24208
A_55_P1988975	Ms4a4b	membrane-spanning 4-domains, subfamily A, member 4B [Source:MGI Symbol;Acc:MGI:1913083] [ENSMUST00000060844]	22.2491	up	-3.18467	-7.66034	chr19	11532299	+	FALSE	mm|19qA	60361	AK080934	membrane-spanning 4-domains, subfamily A, member 4B	chr19:11532299-11532358	GO:0005887		Mm.33957
A_55_P2022585	Pira6	Mus musculus paired-Ig-like receptor A6 (Pira6), transcript variant 2, mRNA [NM_011093]	13.2856	up	1.21305	-2.51874	chr7	4234127	+	FALSE	mm|7qA1	18729	NM_011093	paired-Ig-like receptor A6	chr7:4234127-4234186	GO:0008150|GO:0003674|GO:0005575	NM_011093	Mm.326531
A_55_P2035509	Pyhin1	Mus musculus pyrin and HIN domain family, member 1 (Pyhin1), mRNA [NM_175026]	24.1156	up	-3.3882	-7.98009	chr1	175576265	+	FALSE	mm|1qH3	236312	NM_175026	pyrin and HIN domain family, member 1	chr1:175576265-175576324	GO:0003674|GO:0035458|GO:0005634|GO:0005575	NM_175026	Mm.447
A_55_P2148284			18.3178	up	-3.92655	-8.12173	chrY_random	40996351	-	FALSE					chrY_random:040996410-040996351
A_55_P2227355	Ptpro	Mus musculus protein tyrosine phosphatase, receptor type, O (Ptpro), transcript variant 1, mRNA [NM_011216]	72.1508	up	-0.862065	-7.03501	chr6	137411402	+	FALSE	mm|6qG1	19277	NM_011216	protein tyrosine phosphatase, receptor type, O	chr6:137411402-137411461	GO:0016787|GO:0004872|GO:0004721|GO:0035335|GO:0004725	NM_011216	Mm.186361
A_52_P15461	Il15	Mus musculus interleukin 15 (Il15), mRNA [NM_008357]	5.91412	up	-5.55039	-8.11455	chr8	84858403	-	FALSE	mm|8qC2	16168	NM_008357	interleukin 15	chr8:84858462-84858403	GO:0008284|GO:0032740|GO:0042517|GO:0048662|GO:0005576|GO:0032825|GO:0001866|GO:0032819|GO:0005125|GO:0005615|GO:0050691|GO:0005126|GO:0048535|GO:0005737|GO:0006955|GO:0050778|GO:0045062|GO:0042102|GO:0045580|GO:0030212	NM_008357	Mm.4392
A_55_P2150937			5.23179	down	-8.04351	-5.65621	chr17	69844600	-	FALSE	mm|17qE1.3				chr17:069844659-069844600
A_55_P2243277		RIKEN cDNA 4930524N10 gene [Source:MGI Symbol;Acc:MGI:1922321] [ENSMUST00000082357]	6.03949	down	-5.22284	-2.62841	chrX	150773982	-	FALSE	mm|XqF3		XR_001580		chrX:150774041-150773982		XR_001580	Mm.159415
A_55_P2110713	Anxa2	Mus musculus annexin A2 (Anxa2), mRNA [NM_007585]	24.389	up	4.40699	-0.201169	chr9	69339532	+	FALSE	mm|9qC	12306	NM_007585	annexin A2	chr9:69339532-69339591	GO:0005515|GO:0008092|GO:0048471|GO:0030054|GO:0005886|GO:0031340|GO:0005544|GO:0005737|GO:0043209|GO:0030199|GO:0043220|GO:0007589|GO:0004859|GO:0001725|GO:0017137|GO:0005509|GO:0005578|GO:0051099|GO:0005624|GO:0005546|GO:0030496|GO:0005576|GO:0001525|GO:0043086|GO:0005604|GO:0042383|GO:0043234|GO:0071229|GO:0042730|GO:0005769|GO:0019897	NM_007585	Mm.238343
A_51_P149714	Ms4a6d	Mus musculus membrane-spanning 4-domains, subfamily A, member 6D (Ms4a6d), mRNA [NM_026835]	58.2075	up	-2.02757	-7.8907	chr19	11661426	-	FALSE	mm|19qA	68774	NM_026835	membrane-spanning 4-domains, subfamily A, member 6D	chr19:11661485-11661426	GO:0008150|GO:0003674|GO:0016020|GO:0004872|GO:0016021|GO:0005575	NM_026835	Mm.290390
A_52_P481686	Wtip	Mus musculus WT1-interacting protein (Wtip), mRNA [NM_207212]	6.9687	up	-1.79771	-4.5986	chr7	34894614	-	FALSE	mm|7qB1	101543	NM_207212	WT1-interacting protein	chr7:34894673-34894614	GO:0006355|GO:0030054|GO:0000932|GO:0035195|GO:0008270|GO:0005634|GO:0046872|GO:0006351	NM_207212	Mm.422738
A_55_P2045741	Fyb	Mus musculus FYN binding protein (Fyb), mRNA [NM_011815]	6.36667	up	-3.19334	-5.86388	chr15	6594839	+	FALSE	mm|15qA1	23880	NM_011815	FYN binding protein	chr15:6594839-6594898	GO:0045576|GO:0005737|GO:0005634|GO:0032403|GO:0005829	NM_011815	Mm.170905
A_51_P470328	Sepp1	Mus musculus selenoprotein P, plasma, 1 (Sepp1), transcript variant 3, mRNA [NM_001042614]	6.58423	up	1.84231	-0.876705	chr15	3230418	+	FALSE	mm|15qA1	20363	NM_001042614	selenoprotein P, plasma, 1	chr15:3230418-3230477	GO:0019953|GO:0008430|GO:0001887|GO:0007420|GO:0007626|GO:0005576|GO:0009791|GO:0040007|GO:0005615	NM_001042614	Mm.392203
A_55_P2155479	Eps8	Mus musculus epidermal growth factor receptor pathway substrate 8 (Eps8), mRNA [NM_007945]	5.98959	up	-5.39204	-7.9745	chr6	137425790	-	FALSE	mm|6qG1	13860	NM_007945	epidermal growth factor receptor pathway substrate 8	chr6:137425849-137425790	GO:0008344|GO:0031532|GO:0048149|GO:0017146|GO:0014069|GO:0019717	NM_007945	Mm.235346
A_52_P481423	Cttnbp2nl	Mus musculus CTTNBP2 N-terminal like (Cttnbp2nl), transcript variant 1, mRNA [NM_030249]	19.3258	up	-1.92788	-6.20034	chr3	104805080	-	FALSE	mm|3qF2.2	80281	NM_030249	CTTNBP2 N-terminal like	chr3:104805139-104805080	GO:0008150|GO:0003674|GO:0015629	NM_030249	Mm.200327
A_51_P158018	Bend5	Mus musculus BEN domain containing 5 (Bend5), transcript variant 1, mRNA [NM_026279]	90.4206	up	-1.42703	-7.92561	chr4	111126746	+	FALSE	mm|4qD1	67621	NM_026279	BEN domain containing 5	chr4:111126746-111126805	GO:0008150|GO:0003674|GO:0005794	NM_026279	Mm.45533
A_55_P1959683	Xlr3b	Mus musculus X-linked lymphocyte-regulated 3B (Xlr3b), mRNA [NM_001081643]	16.3983	down	-3.87667	0.158804	chrX	70447883	+	FALSE	mm|XqA7.3	574437	NM_001081643	X-linked lymphocyte-regulated 3B	chrX:70447883-70447942	GO:0008150|GO:0003674|GO:0005575	NM_001081643	Mm.482923
A_51_P246066	Slamf9	Mus musculus SLAM family member 9 (Slamf9), mRNA [NM_029612]	14.814	up	-2.60694	-6.49583	chr1	174408455	+	FALSE	mm|1qH3	98365	NM_029612	SLAM family member 9	chr1:174408455-174408514	GO:0008150|GO:0003674|GO:0016020|GO:0016021|GO:0005575	NM_029612	Mm.150050
A_51_P473272	Tspan6	Mus musculus tetraspanin 6 (Tspan6), mRNA [NM_019656]	9.02432	up	-1.65837	-4.83218	chrX	130426376	-	FALSE	mm|XqE3	56496	NM_019656	tetraspanin 6	chrX:130426435-130426376	GO:0007165|GO:0016020|GO:0016021|GO:0004871|GO:0043123	NM_019656	Mm.46701
A_55_P1968568	Rapgef5	Mus musculus Rap guanine nucleotide exchange factor (GEF) 5 (Rapgef5), mRNA [NM_175930]	6.8845	up	-4.80229	-7.58564	chr12	118995059	+	FALSE	mm|12qF2	217944	NM_175930	Rap guanine nucleotide exchange factor (GEF) 5	chr12:118995059-118995118	GO:0035556|GO:0005622|GO:0005085|GO:0051056|GO:0030742|GO:0007264|GO:0005634|GO:0017034	NM_175930	Mm.227642
A_55_P1959673	Gm4491	Mus musculus adult male diencephalon cDNA, RIKEN full-length enriched library, clone:9330162K03 product:unclassifiable, full insert sequence. [AK034192]	6.71043	up	-5.3495	-8.09591	chr14	57732229	-	FALSE	mm|14qC3	100043515	AK034192	predicted gene 4491	chr14:57732288-57732229	GO:0008150|GO:0003674|GO:0005575		Mm.184028
A_52_P40832	Rab11fip4	RAB11 family interacting protein 4 (class II) [Source:MGI Symbol;Acc:MGI:2442920] [ENSMUST00000017783]	5.74055	up	-5.34621	-7.86739	chr11	79510718	+	FALSE	mm|11qB5	268451	AK147344	RAB11 family interacting protein 4 (class II)	chr11:79510718-79510777	GO:0017137|GO:0030306|GO:0005509|GO:0030496|GO:0031410|GO:0032154|GO:0042803|GO:0000910|GO:0007049|GO:0016020|GO:0006810|GO:0055038|GO:0005768|GO:0051301		Mm.485892
A_52_P358406		predicted gene, 16966 [Source:MGI Symbol;Acc:MGI:4439890] [ENSMUST00000103518]	9.19303	up	-0.951244	-4.15179	chr12	116229490	-	FALSE	mm|12qF2		U55531		chr12:116229549-116229490			Mm.422810
A_55_P2079560	Lilra6	Mus musculus leukocyte immunoglobulin-like receptor, subfamily A (with TM domain), member 6 (Lilra6), transcript variant 1, mRNA [NM_011090]	17.0349	up	1.05085	-3.03956	chr7	3860217	-	FALSE	mm|7qA1	18726	NM_011090	leukocyte immunoglobulin-like receptor, subfamily A (with TM domain), member 6	chr7:3860276-3860217	GO:0008150|GO:0003674|GO:0005575	NM_011090	Mm.440989
A_55_P2036693	Cd40	Mus musculus CD40 antigen (Cd40), transcript variant 1, mRNA [NM_011611]	7.21138	up	-3.9686	-6.81887	chr2	164897085	+	FALSE	mm|2qH3	21939	NM_011611	CD40 antigen	chr2:164897085-164897144	GO:0005515|GO:0035631|GO:0005886|GO:0030890|GO:0005576|GO:0032735|GO:0043231|GO:0051023|GO:0042113|GO:0051607|GO:0002768|GO:0016020|GO:0005488|GO:0050776|GO:0004872|GO:0016021|GO:0019899|GO:2000353|GO:0048304|GO:0009897	NM_011611	Mm.271833
A_55_P2173531	Gm4208	Mus musculus, clone IMAGE:6536098, mRNA. [BC048538]	14.1875	up	-2.14282	-5.96937	chr1	62867933	-	FALSE	mm|1qC2	100043070	BC048538	predicted gene 4208	chr1:62867992-62867933	GO:0008150|GO:0003674|GO:0005575		Mm.247420
A_55_P2187067		predicted gene, 16797 [Source:MGI Symbol;Acc:MGI:4439721] [ENSMUST00000103317]	6.33725	down	-4.9215	-2.25764	chr6	68071630	+	FALSE	mm|6qC1		U30243		chr6:68071630-68071689			Mm.304143
A_51_P246166	Expi	Mus musculus extracellular proteinase inhibitor (Expi), mRNA [NM_007969]	6.49103	up	-2.8635	-5.56195	chr11	83524751	+	FALSE	mm|11qC	14038	NM_007969	extracellular proteinase inhibitor	chr11:83524751-83524810	GO:0010466|GO:0005576|GO:0030414	NM_007969	Mm.1650
A_55_P1981994	Krt17	Mus musculus keratin 17 (Krt17), mRNA [NM_010663]	5.32644	up	-5.52059	-7.93376	chr11	100117535	-	FALSE	mm|11qD	16667	NM_010663	keratin 17	chr11:100117594-100117535	GO:0005882|GO:0005515|GO:0051798|GO:0005737|GO:0045109|GO:0030307|GO:0005198|GO:0031424|GO:0045727|GO:0045111|GO:0002009|GO:0071944	NM_010663	Mm.14046
A_66_P109888	LOC100041550	Mus musculus hypothetical protein LOC100041550 (LOC100041550), mRNA [NM_001199332]	7.35774	up	-5.16136	-8.04062	chrY_random	8781595	-	FALSE		100041550	NM_001199332	hypothetical protein LOC100041550	chrY_random:8781654-8781595		NM_001199332	Mm.485768
A_55_P1998843	Ifi203	Mus musculus interferon activated gene 203 (Ifi203), transcript variant 1, mRNA [NM_001045481]	8.98108	up	-2.06758	-5.23447	chr1	175852372	-	FALSE	mm|1qH3	15950	NM_001045481	interferon activated gene 203	chr1:175852430-175852372	GO:0035458|GO:0005634	NM_001045481	Mm.472787
A_51_P153053	Smpdl3a	Mus musculus sphingomyelin phosphodiesterase, acid-like 3A (Smpdl3a), mRNA [NM_020561]	5.6865	up	-5.57225	-8.07979	chr10	57531406	+	FALSE	mm|10qB4	57319	NM_020561	sphingomyelin phosphodiesterase, acid-like 3A	chr10:57531406-57531465		NM_020561	Mm.2379
A_55_P2173210	LOC100504287	PREDICTED: Mus musculus interferon-activable protein 203-like (LOC100504287), mRNA [XM_003084464]	8.54305	up	0.552424	-2.54233	chr1	175711138	-	FALSE	mm|1qH3	100504287	XM_003084464	interferon-activable protein 203-like	chr1:175711197-175711138		XM_003084464	Mm.442916
A_55_P2089313	Kir3dl2	Mus musculus killer cell immunoglobulin-like receptor, three domains, long cytoplasmic tail, 2 (Kir3dl2), mRNA [NM_177748]	5.36323	up	-5.26197	-7.68507	chrX	132982666	-	FALSE	mm|XqF1	245615	NM_177748	killer cell immunoglobulin-like receptor, three domains, long cytoplasmic tail, 2	chrX:132982725-132982666	GO:0008150|GO:0003674|GO:0004872|GO:0005575	NM_177748	Mm.246624
A_66_P128079	Krt8	Mus musculus blastocyst blastocyst cDNA, RIKEN full-length enriched library, clone:I1C0017I01 product:keratin complex 2, basic, gene 8, full insert sequence. [AK166854]	12.1808	up	-2.70291	-6.30945	chr15	101827138	-	FALSE	mm|15qF3	16691	AK166854	keratin 8	chr15:101827197-101827138	GO:0005515|GO:0005882|GO:0030018|GO:0060706|GO:0045214|GO:0006915|GO:0005634|GO:0007275|GO:0032403|GO:0033209|GO:0042383|GO:0005737|GO:0000904|GO:0016010|GO:0005198|GO:0051599|GO:0043034|GO:0045095|GO:0051707		Mm.358618
A_55_P2025765	Adam8	Mus musculus a disintegrin and metallopeptidase domain 8 (Adam8), mRNA [NM_007403]	6.0389	up	0.980829	-1.61346	chr7	147164873	-	FALSE	mm|7qF4	11501	NM_007403	a disintegrin and metallopeptidase domain 8	chr7:147164932-147164873	GO:0005515|GO:0033089|GO:0032127|GO:0016337|GO:0043524|GO:0006508|GO:0050839|GO:0022407|GO:0030335|GO:0009986|GO:0002523|GO:0005509|GO:0070245|GO:0045785|GO:0005178|GO:0043534|GO:0006944|GO:0007229|GO:0005887|GO:0008270|GO:0008233|GO:0048247|GO:0004222|GO:0008237|GO:0051897|GO:0051044|GO:0005886|GO:0035419|GO:0071133|GO:0002102|GO:0042581|GO:0046872|GO:0005737|GO:0006954|GO:0051092|GO:0045780|GO:…	NM_007403	Mm.15969
A_52_P499907	Kcnj1	Mus musculus potassium inwardly-rectifying channel, subfamily J, member 1 (Kcnj1), transcript variant 2, mRNA [NM_019659]	7.61031	up	-5.04293	-7.97088	chr9	32206612	+	FALSE	mm|9qA4	56379	NM_019659	potassium inwardly-rectifying channel, subfamily J, member 1	chr9:32206612-32206671	GO:0005515|GO:0042277|GO:0005242|GO:0005244|GO:0005886|GO:0030955|GO:0005524|GO:0015272|GO:0000166|GO:0016020|GO:0006810|GO:0034765|GO:0016021|GO:0005216|GO:0006813|GO:0006811	NM_019659	Mm.390168
A_55_P2052016	Crispld2	Mus musculus cysteine-rich secretory protein LCCL domain containing 2 (Crispld2), mRNA [NM_030209]	5.57269	up	-1.34325	-3.82163	chr8	122576633	+	FALSE	mm|8qE1	78892	NM_030209	cysteine-rich secretory protein LCCL domain containing 2	chr8:122576633-122576692	GO:0031012|GO:0030133|GO:0030198|GO:0005576|GO:0005539|GO:0008201	NM_030209	Mm.264680
A_55_P2099363	Stac2	Mus musculus SH3 and cysteine rich domain 2 (Stac2), mRNA [NM_146028]	14.0296	up	-3.41108	-7.22149	chr11	97897939	-	FALSE	mm|11qD	217154	NM_146028	SH3 and cysteine rich domain 2	chr11:97897998-97897939	GO:0035556|GO:0008150|GO:0003674|GO:0005575|GO:0046872	NM_146028	Mm.181008
A_55_P1954393	Susd4	Mus musculus sushi domain containing 4 (Susd4), mRNA [NM_144796]	6.84405	up	-5.30902	-8.08387	chr1	184825726	+	FALSE	mm|1qH5	96935	NM_144796	sushi domain containing 4	chr1:184825726-184825785	GO:0008150|GO:0003674|GO:0016020|GO:0016021|GO:0005575	NM_144796	Mm.331052
A_55_P2006615	Rbbp9	Mus musculus retinoblastoma binding protein 9 (Rbbp9), mRNA [NM_015754]	11.9196	up	-2.66998	-6.24524	chr2	144368183	-	FALSE	mm|2qG1	26450	NM_015754	retinoblastoma binding protein 9	chr2:144368242-144368183	GO:0003674|GO:0005737|GO:0016787|GO:0042127|GO:0005634	NM_015754	Mm.440564
A_55_P1979814	Abcc8	Mus musculus ATP-binding cassette, sub-family C (CFTR/MRP), member 8 (Abcc8), mRNA [NM_011510]	16.0299	up	-3.86634	-7.86903	chr7	53359908	-	FALSE	mm|7qB4	20927	NM_011510	ATP-binding cassette, sub-family C (CFTR/MRP), member 8	chr7:53359967-53359908	GO:0019905|GO:0005886|GO:0005267|GO:0043268|GO:0005524|GO:0010043|GO:0042221|GO:0042383|GO:0000166|GO:0030672|GO:0046676|GO:0009268|GO:0071805	NM_011510	Mm.259076
A_51_P418901	Prss2	Mus musculus protease, serine, 2 (Prss2), mRNA [NM_009430]	5.64438	up	-2.24934	-4.74615	chr6	41473937	+	FALSE	mm|6qB1	22072	NM_009430	protease, serine, 2	chr6:41473937-41473996	GO:0016787|GO:0004252|GO:0030574|GO:0007586|GO:0005509|GO:0006508|GO:0008236|GO:0008233|GO:0005576|GO:0003824|GO:0005615|GO:0046872	NM_009430	Mm.276926
A_55_P2038757	Fblim1	Mus musculus filamin binding LIM protein 1 (Fblim1), transcript variant 2, mRNA [NM_133754]	8.29236	up	-3.57483	-6.62661	chr4	141132045	-	FALSE	mm|4qE1	74202	NM_133754	filamin binding LIM protein 1	chr4:141132104-141132045	GO:0008150|GO:0003674|GO:0005737|GO:0030054|GO:0008360|GO:0008270|GO:0007155|GO:0005856|GO:0046872|GO:0043231|GO:0005829	NM_133754	Mm.286536
A_51_P100768		RIKEN cDNA 4833413E03 gene [Source:MGI Symbol;Acc:MGI:1925354] [ENSMUST00000013706]	5.16335	down	-7.35749	-4.98918	chr17	31695799	+	FALSE	mm|17qB1		AK019514		chr17:31695799-31695858
A_55_P2266295	Fzd3	Mus musculus frizzled homolog 3 (Drosophila) (Fzd3), mRNA [NM_021458]	6.51506	up	-5.23752	-7.9413	chr14	65854084	-	FALSE	mm|14qD1	14365	NM_021458	frizzled homolog 3 (Drosophila)	chr14:65854142-65854084	GO:0005515|GO:0001736|GO:0008406|GO:0030424|GO:0017147|GO:0005886|GO:0071679|GO:0007199|GO:0030425|GO:0033278|GO:0005737|GO:0016324|GO:0043025|GO:0004872|GO:0004871|GO:0016055|GO:0060070|GO:0001944|GO:0042813|GO:0048786|GO:0042472|GO:0006357|GO:0004930|GO:0045177|GO:0001843|GO:0007275|GO:0032589|GO:0030165|GO:0007165|GO:0021754|GO:0007186|GO:0016020|GO:0030901|GO:0016021|GO:0001764|GO:0007166|GO:…	NM_021458	Mm.214687
A_52_P547491	1520402A15Rik	Mus musculus RIKEN cDNA 1520402A15 gene (1520402A15Rik), mRNA [NM_026547]	6.78119	up	-5.34612	-8.10765	chr4	115809943	-	FALSE	mm|4qD1	68075	NM_026547	RIKEN cDNA 1520402A15 gene	chr4:115810002-115809943	GO:0003674|GO:0005737|GO:0001819|GO:0043123	NM_026547	Mm.132803
A_51_P470079	Il1r2	Mus musculus interleukin 1 receptor, type II (Il1r2), mRNA [NM_010555]	23.4062	up	0.75794	-3.79088	chr1	40180014	+	FALSE	mm|1qB	16178	NM_010555	interleukin 1 receptor, type II	chr1:40180014-40180073	GO:0004910|GO:0016020|GO:0005886|GO:0004908|GO:0004872|GO:0016021	NM_010555	Mm.1349
A_55_P1963264	LOC100040412	PREDICTED: Mus musculus lysine-specific demethylase 5D-like (LOC100040412), mRNA [XM_001474638]	37.5314	up	-2.37705	-7.60707	chrY	247245	+	FALSE	mm|YqA1	100040412	XM_001474638	lysine-specific demethylase 5D-like	chrY:247245-247304		XM_001474638
A_51_P172085	Arhgdig	Mus musculus Rho GDP dissociation inhibitor (GDI) gamma (Arhgdig), mRNA [NM_008113]	9.00496	up	-2.4337	-5.60442	chr17	26336228	-	FALSE	mm|17qA3.3	14570	NM_008113	Rho GDP dissociation inhibitor (GDI) gamma	chr17:26336287-26336228	GO:0032880|GO:0005515|GO:0050790|GO:0005737|GO:0005083|GO:0005624|GO:0005092|GO:0005094|GO:0005096	NM_008113	Mm.1383
A_51_P155152	Ank	Mus musculus progressive ankylosis (Ank), mRNA [NM_020332]	7.68297	up	-1.30403	-4.2457	chr15	27523965	+	FALSE	mm|15qB1	11732	NM_020332	progressive ankylosis	chr15:27523965-27524024	GO:0030500|GO:0005886|GO:0035435|GO:0015114|GO:0030504|GO:0030505|GO:0034220|GO:0016020|GO:0005887|GO:0006810|GO:0006817|GO:0005315|GO:0016021	NM_020332	Mm.265264
A_66_P125035	Gm10394	Mus musculus predicted gene 10394 (Gm10394), mRNA [NM_001177538]	9.2013	up	-3.13483	-6.33667	chr14	26949189	+	FALSE	mm|14qA3	100039227	NM_001177538	predicted gene 10394	chr14:26949189-26949248	GO:0008150|GO:0003674|GO:0005575	NM_001177538	Mm.428840
A_51_P140321	Mocos	Mus musculus molybdenum cofactor sulfurase (Mocos), mRNA [NM_026779]	22.2563	up	-3.00806	-7.48421	chr18	24859890	+	FALSE	mm|18qA2	68591	NM_026779	molybdenum cofactor sulfurase	chr18:24859890-24859949	GO:0043545|GO:0030170|GO:0008152|GO:0006777|GO:0003824|GO:0016829|GO:0008265|GO:0030151|GO:0005829	NM_026779	Mm.28252
A_52_P599264	Mdfic	Mus musculus MyoD family inhibitor domain containing (Mdfic), mRNA [NM_175088]	13.2032	up	-1.19098	-4.9138	chr6	15750676	+	FALSE	mm|6qA1	16543	NM_175088	MyoD family inhibitor domain containing	chr6:15750676-15750735	GO:0005515|GO:0006355|GO:0030111|GO:0030332|GO:0005730|GO:0005634|GO:0007257|GO:0030957|GO:0006351|GO:0050434|GO:0005737|GO:0042308|GO:0045893|GO:0045892|GO:0008134	NM_175088	Mm.1314
A_55_P2051721	Psg22	Mus musculus pregnancy-specific glycoprotein 22 (Psg22), mRNA [NM_001004152]	5.87531	up	-4.4424	-6.99706	chr7	19312535	+	FALSE	mm|7qA3	243862	NM_001004152	pregnancy-specific glycoprotein 22	chr7:19312535-19312594	GO:0008150|GO:0003674|GO:0007565|GO:0005575	NM_001004152	Mm.389833
A_51_P441426	Pf4	Mus musculus platelet factor 4 (Pf4), mRNA [NM_019932]	11.6494	up	-4.54514	-8.08733	chr5	91202275	+	FALSE	mm|5qE1	56744	NM_019932	platelet factor 4	chr5:91202275-91202334	GO:0008009|GO:0043066|GO:0032760|GO:0030595|GO:0010744|GO:0019221|GO:0030168|GO:0005576|GO:0045651|GO:0031982|GO:0005125|GO:0005615|GO:0010628|GO:0045653|GO:0043234|GO:0006955|GO:0006461|GO:0006935|GO:0045918|GO:0045347|GO:0016525|GO:0031091|GO:0008201	NM_019932	Mm.332490
A_55_P1983683	Rgag4	Mus musculus retrotransposon gag domain containing 4 (Rgag4), transcript variant 1, mRNA [NM_183318]	5.94986	up	-1.28073	-3.85359	chrX	99261911	-	FALSE	mm|XqD	331474	NM_183318	retrotransposon gag domain containing 4	chrX:99261970-99261911	GO:0008150|GO:0003674|GO:0005575	NM_183318	Mm.23297
A_51_P291417	Thbd	Mus musculus thrombomodulin (Thbd), mRNA [NM_009378]	11.7416	up	-2.91136	-6.46491	chr2	148230235	-	FALSE	mm|2qG3	21824	NM_009378	thrombomodulin	chr2:148230294-148230235	GO:0007565|GO:0005886|GO:0009986|GO:0005509|GO:0009790|GO:0005615|GO:0050819|GO:0016020|GO:0005488|GO:0007596|GO:0004872|GO:0016021|GO:0004888	NM_009378	Mm.24096
A_55_P2422826	Tcrg-V2	Mus musculus 3 days neonate thymus cDNA, RIKEN full-length enriched library, clone:A630081L08 product:unclassifiable, full insert sequence. [AK042318]	23.9469	down	-7.80153	-3.21977	chr13	19400718	-	FALSE	mm|13qA2	21636	AK042318	T-cell receptor gamma, variable 2	chr13:19400777-19400718			Mm.211738
A_52_P15490	Pvrl3	Mus musculus poliovirus receptor-related 3 (Pvrl3), transcript variant beta, mRNA [NM_021496]	6.80858	up	-5.23417	-8.00153	chr16	46454777	-	FALSE	mm|16qB5	58998	NM_021496	poliovirus receptor-related 3	chr16:46454836-46454777	GO:0005515|GO:0005886|GO:0060042|GO:0042803|GO:0009566|GO:0043296|GO:0016337|GO:0005913|GO:0002089|GO:0016020|GO:0005911|GO:0016021|GO:0007155|GO:0050839|GO:0007156	NM_021496	Mm.328072
A_51_P103397	Vwf	Mus musculus Von Willebrand factor homolog (Vwf), mRNA [NM_011708]	9.55	up	-2.614	-5.8695	chr6	125636551	+	FALSE	mm|6qF3	22371	NM_011708	Von Willebrand factor homolog	chr6:125636551-125636610	GO:0033093|GO:0005515|GO:0005783|GO:0031589|GO:0005518|GO:0051087|GO:0005578|GO:0030168|GO:0005576|GO:0001890|GO:0002020|GO:0042803|GO:0031012|GO:0001889|GO:0007599|GO:0047485|GO:0001948|GO:0005178|GO:0019865|GO:0007596|GO:0051260|GO:0007155|GO:0009897	NM_011708	Mm.22339
A_52_P25026	Klra17	Mus musculus killer cell lectin-like receptor, subfamily A, member 17 (Klra17), mRNA [NM_133203]	7.44637	up	-4.83471	-7.73125	chr6	129818820	-	FALSE	mm|6qF3	170733	NM_133203	killer cell lectin-like receptor, subfamily A, member 17	chr6:129822239-129818820	GO:0005529|GO:0004872|GO:0016021	NM_133203	Mm.155514
A_55_P1991079	Phf21b	Mus musculus PHD finger protein 21B (Phf21b), transcript variant 1, mRNA [NM_001081166]	8.56765	down	-2.93739	0.161506	chr15	84615826	-	FALSE	mm|15qE2	271305	NM_001081166	PHD finger protein 21B	chr15:84615885-84615826	GO:0008150|GO:0003674|GO:0008270|GO:0005575|GO:0046872	NM_001081166	Mm.101022
A_55_P1972605	Adora3	Mus musculus adenosine A3 receptor (Adora3), transcript variant 1, mRNA [NM_009631]	26.8608	up	-0.283	-5.03043	chr3	105711212	+	FALSE	mm|3qF2.2	11542	NM_009631	adenosine A3 receptor	chr3:105711212-105711271	GO:0014061|GO:0005886|GO:0004930|GO:0014068|GO:0070257|GO:0050850|GO:0043306|GO:0042734|GO:0001609|GO:0007165|GO:0001973|GO:0002553|GO:0007186|GO:0005887|GO:0050729|GO:0002687|GO:0004872|GO:0016021|GO:0004871	NM_009631	Mm.235024
A_51_P156274	Ltbr	Mus musculus lymphotoxin B receptor (Ltbr), mRNA [NM_010736]	8.22094	up	-0.967174	-4.00648	chr6	125256614	-	FALSE	mm|6qF3	17000	NM_010736	lymphotoxin B receptor	chr6:125256673-125256614	GO:0005515|GO:0016020|GO:0005488|GO:0006915|GO:0004872|GO:0016021|GO:0048535	NM_010736	Mm.3122
A_66_P118093			13.3393	up	-3.82779	-7.5654	chr2	119146923	-	FALSE	mm|2qE5				chr2:119146982-119146923
A_65_P11216		predicted gene 10451 [Source:MGI Symbol;Acc:MGI:3641898] [ENSMUST00000101281]	6.24749	up	-5.27949	-7.92276	chr12	77552193	+	FALSE	mm|12qC3		AK136613		chr12:77552193-77552252			Mm.259350
A_55_P2134218	Wdr31	Mus musculus WD repeat domain 31 (Wdr31), mRNA [NM_023597]	8.4002	up	-4.03624	-7.10666	chr4	62116919	-	FALSE	mm|4qB3	71354	NM_023597	WD repeat domain 31	chr4:62116978-62116919	GO:0008150|GO:0003674|GO:0005575	NM_023597	Mm.155573
A_51_P258372	Igsf6	Mus musculus immunoglobulin superfamily, member 6 (Igsf6), mRNA [NM_030691]	197.404	up	0.0594702	-7.56554	chr7	128207755	-	FALSE	mm|7qF2	80719	NM_030691	immunoglobulin superfamily, member 6	chr7:128207814-128207755	GO:0008150|GO:0003674|GO:0016020|GO:0016021|GO:0005575	NM_030691	Mm.160384
A_52_P398925	Stfa2l1	Mus musculus stefin A2 like 1 (Stfa2l1), mRNA [NM_173869]	123.934	up	-0.980731	-7.93416	chr16	36160118	+	FALSE	mm|16qB3	268885	NM_173869	stefin A2 like 1	chr16:36160118-36161876	GO:0008150|GO:0003674|GO:0004869|GO:0010466|GO:0005575|GO:0030414	NM_173869	Mm.187847
A_51_P386612	Pir	Mus musculus pirin (Pir), mRNA [NM_027153]	5.12265	up	-4.32918	-6.68606	chrX	160810423	+	FALSE	mm|XqF5	69656	NM_027153	pirin	chrX:160810423-160810482	GO:0005737|GO:0016491|GO:0008127|GO:0005634|GO:0016702|GO:0046872|GO:0055114	NM_027153	Mm.293463
A_51_P211305	Alpk3	Mus musculus alpha-kinase 3 (Alpk3), mRNA [NM_054085]	6.44255	down	-3.23165	-0.544023	chr7	88250126	+	FALSE	mm|7qD3	116904	NM_054085	alpha-kinase 3	chr7:88250126-88250185	GO:0007507|GO:0003674|GO:0005634	NM_054085	Mm.475768
A_55_P2151685	Pira11	Mus musculus paired-Ig-like receptor A11 (Pira11), mRNA [NM_011088]	12.4692	up	1.37082	-2.26947	chr7	3789757	-	FALSE	mm|7qA1	18724	NM_011088	paired-Ig-like receptor A11	chr7:3789816-3789757	GO:0008150|GO:0007165|GO:0003674|GO:0004872|GO:0005575	NM_011088	Mm.482470
A_66_P105801	Igf1r	Mus musculus insulin-like growth factor I receptor (Igf1r), mRNA [NM_010513]	5.29919	up	-2.63218	-5.03796	chr7	75378461	+	FALSE	mm|7qD1	16001	NM_010513	insulin-like growth factor I receptor	chr7:75378461-75378520	GO:0005515|GO:0005158|GO:0030010|GO:0030879|GO:0043560|GO:0007409|GO:0031175|GO:0042802|GO:0046777|GO:0000166|GO:0016301|GO:0009887|GO:0043559|GO:0016772|GO:0005520|GO:0005792|GO:0030335|GO:0032467|GO:0045740|GO:0016310|GO:0007420|GO:0043548|GO:0051898|GO:0051897|GO:0043005|GO:0005886|GO:0031994|GO:0051291|GO:0046872|GO:0043409|GO:0006955|GO:0030238|GO:0090031|GO:0004872|GO:0051054|GO:0051262|GO:…	NM_010513	Mm.275742
A_55_P2095311	Ly6g	lymphocyte antigen 6 complex, locus G [Source:MGI Symbol;Acc:MGI:109440] [ENSMUST00000023246]	5.57448	up	-4.94712	-7.42596	chr15	74989023	+	FALSE	mm|15qD3	546644	XM_001475753	lymphocyte antigen 6 complex, locus G	chr15:74989023-74989082	GO:0016020|GO:0005886|GO:0031225|GO:0009897	XM_001475753
A_55_P2052563	Id1	Mus musculus inhibitor of DNA binding 1 (Id1), mRNA [NM_010495]	8.96244	up	-0.273108	-3.437	chr2	152563083	+	FALSE	mm|2qH1	15901	NM_010495	inhibitor of DNA binding 1	chr2:152563083-152563142	GO:0005515|GO:0060426|GO:0003700|GO:0060425|GO:0005634|GO:0043433|GO:0007507|GO:0031648|GO:0005737|GO:0051789|GO:0043408|GO:0046677|GO:0006355|GO:0006915|GO:0045765|GO:0007275|GO:0005625|GO:0030509|GO:0000122|GO:0006351|GO:0043392|GO:0045668|GO:0001886|GO:0032963|GO:0045892	NM_010495	Mm.444
A_55_P1998471	S100a9	Mus musculus S100 calcium binding protein A9 (calgranulin B) (S100a9), mRNA [NM_009114]	2906.84	up	3.44318	-8.06205	chr3	90496573	-	FALSE	mm|3qF1	20202	NM_009114	S100 calcium binding protein A9 (calgranulin B)	chr3:90496632-90496573	GO:0005737|GO:0031532|GO:0016020|GO:0006935|GO:0005886|GO:0030595|GO:0045113|GO:0005509|GO:0005634|GO:0005576|GO:0005856|GO:0005615	NM_009114	Mm.2128
A_55_P2025078	Csf1r	Mus musculus colony stimulating factor 1 receptor (Csf1r), mRNA [NM_001037859]	21.8465	up	3.64946	-0.799868	chr18	61290725	+	FALSE	mm|18qE1	12978	NM_001037859	colony stimulating factor 1 receptor	chr18:61290725-61290784	GO:0005515|GO:0005886|GO:0008283|GO:0045672|GO:0005524|GO:0042803|GO:0043235|GO:0016310|GO:0019955|GO:0004672|GO:0000166|GO:0016020|GO:0016301|GO:0004872|GO:0006468|GO:0004713|GO:0016021|GO:0004714|GO:0007169|GO:0016740|GO:0016772	NM_001037859	Mm.22574
A_55_P2162782	Ahnak	Mus musculus AHNAK nucleoprotein (desmoyokin) (Ahnak), transcript variant 1, mRNA [NM_009643]	5.91046	up	-2.76762	-5.33089	chr19	9090559	+	FALSE	mm|19qA	66395	NM_009643	AHNAK nucleoprotein (desmoyokin)	chr19:9090559-9090618	GO:0005911	NM_009643	Mm.203866
A_55_P2056070	Hfe	Mus musculus hemochromatosis (Hfe), mRNA [NM_010424]	6.43957	up	-2.9074	-5.59437	chr13	23795710	-	FALSE	mm|13qA3.1	15216	NM_010424	hemochromatosis	chr13:23795769-23795710	GO:0048471|GO:0045178|GO:0045177|GO:0042446|GO:0031528|GO:0031410|GO:0016021|GO:0055037|GO:0060586|GO:0055072|GO:0005769	NM_010424	Mm.2681
A_51_P155909	1700113H08Rik	Mus musculus RIKEN cDNA 1700113H08 gene (1700113H08Rik), mRNA [NM_029685]	6.30091	down	-4.85077	-2.19521	chr10	86693165	+	FALSE	mm|10qC1	76640	NM_029685	RIKEN cDNA 1700113H08 gene	chr10:86693165-86693224	GO:0008150|GO:0003674|GO:0005575	NM_029685	Mm.78423
A_55_P1967820	AI661453	Mus musculus expressed sequence AI661453 (AI661453), mRNA [NM_145489]	13.6411	up	-3.46925	-7.23914	chr17	47607434	+	FALSE	mm|17qC	224833	NM_145489	expressed sequence AI661453	chr17:47607434-47607493	GO:0008150|GO:0003674|GO:0005575	NM_145489	Mm.218444
A_52_P269158	Pid1	Mus musculus phosphotyrosine interaction domain containing 1 (Pid1), mRNA [NM_001003948]	12.8366	up	-3.34361	-7.0258	chr1	84033411	-	FALSE	mm|1qC5	98496	NM_001003948	phosphotyrosine interaction domain containing 1	chr1:84033470-84033411	GO:0008150|GO:0003674|GO:0005737|GO:0005575	NM_001003948	Mm.187470
A_66_P138406	Clec4b1	Mus musculus C-type lectin domain family 4, member b1 (Clec4b1), transcript variant 2, mRNA [NM_027218]	96.0741	up	-1.469	-8.05507	chr6	123000666	+	FALSE	mm|6qF2	69810	NM_027218	C-type lectin domain family 4, member b1	chr6:123000666-123018461	GO:0005529|GO:0004872	NM_027218	Mm.333374
A_55_P2036180	Mcf2l	Mus musculus mcf.2 transforming sequence-like (Mcf2l), transcript variant 1, mRNA [NM_178076]	6.84792	up	-5.00861	-7.78428	chr8	13020440	+	FALSE	mm|8qA1.1	17207	NM_178076	mcf.2 transforming sequence-like	chr8:13020440-13020499	GO:0005515|GO:0005085|GO:0008624|GO:0005545|GO:0050790|GO:0016020|GO:0006915|GO:0007266|GO:0005089|GO:0030027|GO:0005829	NM_178076	Mm.334413
A_55_P2363030	Gm9853	Mus musculus predicted gene, ENSMUSG00000051554, mRNA (cDNA clone MGC:32180 IMAGE:5005221), complete cds. [BC022771]	5.52225	up	-2.6357	-5.10095	chr8	106875205	-	FALSE	mm|8qD3	791360	BC022771	predicted gene 9853	chr8:106875264-106875205	GO:0008150|GO:0003674|GO:0005575		Mm.29658
A_51_P203955	Gbp2	Mus musculus guanylate binding protein 2 (Gbp2), mRNA [NM_010260]	13.0273	up	-1.7398	-5.44327	chr3	142300719	+	FALSE	mm|3qH1	14469	NM_010260	guanylate binding protein 2	chr3:142300719-142300778	GO:0005886|GO:0035458|GO:0050830|GO:0020005|GO:0003924|GO:0042832|GO:0031410|GO:0051856|GO:0005525|GO:0006184|GO:0071222|GO:0071346|GO:0000166|GO:0016020	NM_010260	Mm.24038
A_55_P1964638	Cxadr	Mus musculus coxsackie virus and adenovirus receptor (Cxadr), transcript variant 1, mRNA [NM_001025192]	8.27444	up	-4.96759	-8.01625	chr16	78340937	+	FALSE	mm|16qC3.1	13052	NM_001025192	coxsackie virus and adenovirus receptor	chr16:78340937-78340996	GO:0005515|GO:0060044|GO:0030054|GO:0001669|GO:0005886|GO:0005576|GO:0005634|GO:0045216|GO:0007507|GO:0048739|GO:0005737|GO:0016020|GO:0005911|GO:0004872|GO:0016021|GO:0005923|GO:0007005|GO:0007155	NM_001025192	Mm.66222
A_55_P2020607	Pacsin1	Mus musculus protein kinase C and casein kinase substrate in neurons 1 (Pacsin1), transcript variant 1, mRNA [NM_011861]	5.63616	up	-2.19612	-4.69083	chr17	27847992	+	FALSE	mm|17qA3.3	23969	NM_011861	protein kinase C and casein kinase substrate in neurons 1	chr17:27847992-27848051	GO:0008092|GO:0005802|GO:0005515|GO:0016310|GO:0007165|GO:0005737|GO:0030137|GO:0016301|GO:0045806|GO:0007010|GO:0006897	NM_011861	Mm.4926
A_51_P212754	Tgfbi	Mus musculus transforming growth factor, beta induced (Tgfbi), mRNA [NM_009369]	102.008	up	1.5049	-5.16763	chr13	56740460	+	FALSE	mm|13qB1	21810	NM_009369	transforming growth factor, beta induced	chr13:56740460-56740519	GO:0030198|GO:0050840|GO:0005578|GO:0005576|GO:0007155|GO:0005615	NM_009369	Mm.14455
A_55_P2036017	Gm2837	Mus musculus predicted gene 2837 (Gm2837), non-coding RNA [NR_040388]	5.65957	up	-2.59493	-5.09562	chrX	31060755	+	FALSE	mm|XqA3.1	100040552	NR_040388	spindlin family, member 2 pseudogene	chrX:31060755-31060814	GO:0008150|GO:0003674|GO:0005575	NR_040388	Mm.484928
A_55_P2183652	9130206I24Rik	Mus musculus RIKEN cDNA 9130206I24 gene (9130206I24Rik), non-coding RNA [NR_030721]	6.31202	down	-5.26663	-2.60853	chr4	114588837	+	FALSE	mm|4qD1	100040736	NR_030721	RIKEN cDNA 9130206I24 gene	chr4:114588837-114588896	GO:0008150|GO:0003674|GO:0005575	NR_030721	Mm.231287
A_55_P2043921	Hmga2	Mus musculus high mobility group AT-hook 2 (Hmga2), mRNA [NM_010441]	333.898	up	0.37929	-8.00397	chr10	119800621	-	FALSE	mm|10qD2	15364	NM_010441	high mobility group AT-hook 2	chr10:119800680-119800621	GO:0005515|GO:0006355|GO:0033144|GO:0005634|GO:0000122|GO:0000228|GO:0003677|GO:0046426|GO:0006351|GO:0007165|GO:0051091|GO:0007049|GO:0007067|GO:0019899|GO:0000785|GO:0040008|GO:0051301	NM_010441	Mm.157190
A_51_P424878	2810405K02Rik	Mus musculus RIKEN cDNA 2810405K02 gene (2810405K02Rik), mRNA [NM_025582]	5.70896	up	-2.04383	-4.55706	chr4	154270546	-	FALSE	mm|4qE2	66469	NM_025582	RIKEN cDNA 2810405K02 gene	chr4:154270605-154270546	GO:0008610|GO:0005737|GO:0001516|GO:0016491|GO:0047017|GO:0006633|GO:0055114|GO:0016616|GO:0005829	NM_025582	Mm.41868
A_51_P438967	Gpnmb	Mus musculus glycoprotein (transmembrane) nmb (Gpnmb), mRNA [NM_053110]	643.417	up	1.45669	-7.87292	chr6	49006386	+	FALSE	mm|6qB2.3	93695	NM_053110	glycoprotein (transmembrane) nmb	chr6:49006386-49006445	GO:0005178|GO:0016020|GO:0005887|GO:0016023|GO:0031410|GO:0016021|GO:0007155|GO:0008201	NM_053110	Mm.302602
A_55_P1984406	Lrrk2	Mus musculus leucine-rich repeat kinase 2 (Lrrk2), mRNA [NM_025730]	7.14915	up	-3.83113	-6.6689	chr15	91646398	+	FALSE	mm|15qE3	66725	NM_025730	leucine-rich repeat kinase 2	chr15:91646398-91646457	GO:0005802|GO:0007406|GO:0042803|GO:0005622|GO:0022028|GO:0043068|GO:0046777|GO:0000166|GO:0018105|GO:0000165|GO:0016301|GO:0031398|GO:0019717|GO:0061002|GO:0006979|GO:0010942|GO:0004708|GO:0035640|GO:0016772|GO:0005792|GO:0048312|GO:0043547|GO:0016310|GO:0070997|GO:0045121|GO:0010508|GO:0032473|GO:0030424|GO:0005886|GO:0007264|GO:0032436|GO:0035564|GO:0008340|GO:0030425|GO:0040012|GO:0005737|GO:…	NM_025730	Mm.37558
A_55_P1978636		predicted gene 10715 [Source:MGI Symbol;Acc:MGI:3642376] [ENSMUST00000099035]	8.83409	up	0.155737	-2.98735	chr9	3038257	+	FALSE	mm|9qA1				chr9:3038257-3038316
A_51_P109570	Klrb1b	Mus musculus killer cell lectin-like receptor subfamily B member 1B (Klrb1b), mRNA [NM_030599]	7.77515	up	-4.98308	-7.94195	chr6	128765040	-	FALSE	mm|6qF3	80782	NM_030599	killer cell lectin-like receptor subfamily B member 1B	chr6:128765099-128765040	GO:0005515|GO:0007165|GO:0016020|GO:0005887|GO:0005488|GO:0045953|GO:0005529|GO:0004872|GO:0016021|GO:0042803|GO:0009897	NM_030599	Mm.6180
A_51_P284946	Rnd3	Mus musculus Rho family GTPase 3 (Rnd3), mRNA [NM_028810]	9.75051	up	-2.17846	-5.46394	chr2	50985995	-	FALSE	mm|2qC1.1	74194	NM_028810	Rho family GTPase 3	chr2:50986054-50985995	GO:0005622|GO:0005794|GO:0016020|GO:0000166|GO:0007264|GO:0005525	NM_028810	Mm.46497
A_51_P229925	Chst7	Mus musculus carbohydrate (N-acetylglucosamino) sulfotransferase 7 (Chst7), mRNA [NM_021715]	6.35462	up	-3.8356	-6.50341	chrX	19674422	+	FALSE	mm|XqA1.3	60322	NM_021715	carbohydrate (N-acetylglucosamino) sulfotransferase 7	chrX:19674422-19674481	GO:0006790|GO:0030206|GO:0005794|GO:0016020|GO:0000139|GO:0005975|GO:0008459|GO:0008146|GO:0006044|GO:0016021|GO:0001517|GO:0016740	NM_021715	Mm.44827
A_55_P2077313	Ddr1	Mus musculus discoidin domain receptor family, member 1 (Ddr1), transcript variant 1, mRNA [NM_007584]	7.89851	up	-5.07728	-8.05886	chr17	35818513	-	FALSE	mm|17qB1	12305	NM_007584	discoidin domain receptor family, member 1	chr17:35818572-35818513	GO:0008285|GO:0005886|GO:0001558|GO:0043583|GO:0016323|GO:0051789|GO:0000166|GO:0016301|GO:0004872|GO:0007155|GO:0016772|GO:0007566|GO:0018108|GO:0005524|GO:0016310|GO:0004672|GO:0016020|GO:0001952|GO:0006468|GO:0004713|GO:0016021|GO:0004714|GO:0007169|GO:0060749|GO:0016740|GO:0060444	NM_007584	Mm.5021
A_52_P402705	Kcnj11	Mus musculus potassium inwardly rectifying channel, subfamily J, member 11 (Kcnj11), transcript variant 1, mRNA [NM_010602]	8.61335	up	-4.41979	-7.52637	chr7	53353119	-	FALSE	mm|7qB4	16514	NM_010602	potassium inwardly rectifying channel, subfamily J, member 11	chr7:53353178-53353119	GO:0005886|GO:0008282|GO:0005783|GO:0005739|GO:0015272|GO:0042391|GO:0006810|GO:0006006|GO:0033198|GO:0034765|GO:0046676|GO:0006813|GO:0006811|GO:0005792|GO:0005242|GO:0005244|GO:0042493|GO:0010107|GO:0030315|GO:0030955|GO:0008022|GO:0005524|GO:0042383|GO:0050796|GO:0016020|GO:0050877|GO:0016021|GO:0005216	NM_010602	Mm.333863
A_51_P183051	Upb1	Mus musculus ureidopropionase, beta (Upb1), mRNA [NM_133995]	7.31846	up	-4.84998	-7.72152	chr10	74902842	+	FALSE	mm|10qC1	103149	NM_133995	ureidopropionase, beta	chr10:74902842-74902901	GO:0019482|GO:0006807|GO:0005737|GO:0016810|GO:0016787|GO:0008152|GO:0008270|GO:0005625|GO:0003837|GO:0003824|GO:0046872|GO:0005829	NM_133995	Mm.441195
A_55_P2039274	Hspb3	Mus musculus heat shock protein 3 (Hspb3), mRNA [NM_019960]	7.67139	down	-2.87191	0.0675783	chr13	114453236	-	FALSE	mm|13qD2.2	56534	NM_019960	heat shock protein 3	chr13:114453295-114453236	GO:0005737|GO:0006950|GO:0005634	NM_019960	Mm.41410
A_55_P2001628	Rps4y2	Mus musculus ribosomal protein S4, Y-linked 2 (Rps4y2), non-coding RNA [NR_003634]	10.1661	up	-4.70765	-8.05334	chr6	148304043	+	FALSE	mm|6qG3	66184	NR_003634	ribosomal protein S4, Y-linked 2	chr6:148304043-148304102	GO:0008150|GO:0003674|GO:0005840|GO:0005575	NR_003634	Mm.3572
A_51_P168395	Ttc30a1	Mus musculus tetratricopeptide repeat domain 30A1 (Ttc30a1), mRNA [NM_030188]	5.5778	up	-3.08087	-5.56056	chr2	75817253	-	FALSE	mm|2qC3	78802	NM_030188	tetratricopeptide repeat domain 30A1	chr2:75817312-75817253	GO:0008150|GO:0005929|GO:0003674|GO:0005488|GO:0030030|GO:0042995|GO:0005575	NM_030188	Mm.282339
A_51_P438619	Sobp	Mus musculus sine oculis-binding protein homolog (Drosophila) (Sobp), mRNA [NM_175407]	53.1001	down	-4.46329	1.26735	chr10	42723011	-	FALSE	mm|10qB2	109205	NM_175407	sine oculis-binding protein homolog (Drosophila)	chr10:42723070-42723011	GO:0042472|GO:0007605|GO:0007626|GO:0046872	NM_175407	Mm.153750
A_52_P522427	Hsh2d	Mus musculus hematopoietic SH2 domain containing (Hsh2d), mRNA [NM_197944]	10.5433	up	-2.59155	-5.98981	chr8	74724786	+	FALSE	mm|8qB3.3	209488	NM_197944	hematopoietic SH2 domain containing	chr8:74724786-74724845	GO:0005739|GO:0042110|GO:0005737|GO:0005070|GO:0005575	NM_197944	Mm.157431
A_55_P2155848	Gm14207	Mus musculus predicted gene 14207 (Gm14207), non-coding RNA [NR_030683]	9.09816	up	-4.83997	-8.02554	chr2	119147094	-	FALSE	mm|2qE5	100043609	NR_030683	predicted gene 14207	chr2:119147153-119147094	GO:0008150|GO:0003674|GO:0005575	NR_030683	Mm.185068
A_66_P126332	Zfp703	Mus musculus zinc finger protein 703 (Zfp703), transcript variant 2, mRNA [NM_001110508]	10.1064	up	2.18923	-1.14797	chr8	28091863	+	FALSE	mm|8qA2	353310	NM_001110508	zinc finger protein 703	chr8:28091863-28091922	GO:0006355|GO:0008284|GO:0030335|GO:0034333|GO:0010718|GO:0005634|GO:0034111|GO:0003676|GO:0046872|GO:0006351|GO:0060828|GO:0005622|GO:0005737|GO:0060644|GO:0070491|GO:0051726|GO:0008270|GO:0017015|GO:0045892|GO:0033601	NM_001110508	Mm.212469
A_52_P71686	Atp6v0d2	Mus musculus ATPase, H+ transporting, lysosomal V0 subunit D2 (Atp6v0d2), mRNA [NM_175406]	5.62411	up	-4.93724	-7.42886	chr4	19804304	-	FALSE	mm|4qA3	242341	NM_175406	ATPase, H+ transporting, lysosomal V0 subunit D2	chr4:19804363-19804304	GO:0033177|GO:0015078|GO:0033572|GO:0016324|GO:0016020|GO:0006810|GO:0015991|GO:0005769|GO:0010008|GO:0016471|GO:0033179|GO:0005768|GO:0006811|GO:0015992	NM_175406	Mm.19298
A_55_P1975155	Galnt6	Mus musculus UDP-N-acetyl-alpha-D-galactosamine:polypeptide N-acetylgalactosaminyltransferase 6 (Galnt6), transcript variant 1, mRNA [NM_001161767]	64.211	up	-0.777561	-6.78231	chr15	100522237	-	FALSE	mm|15qF1	207839	NM_001161767	UDP-N-acetyl-alpha-D-galactosamine:polypeptide N-acetylgalactosaminyltransferase 6	chr15:100522296-100522237	GO:0048471|GO:0004653|GO:0005794|GO:0016020|GO:0016757|GO:0008152|GO:0005529|GO:0016021|GO:0016740	NM_001161767	Mm.22969
A_52_P462657	Gm11545	Mus musculus predicted gene 11545 (Gm11545), mRNA [NM_001105561]	5.57388	up	-4.0314	-6.51008	chr11	94616520	-	FALSE	mm|11qD	217122	NM_001105561	predicted gene 11545	chr11:94616579-94616520		NM_001105561	Mm.485150
A_55_P1958165	Ms4a7	Mus musculus membrane-spanning 4-domains, subfamily A, member 7 (Ms4a7), transcript variant 2, mRNA [NM_001025610]	157.842	up	0.0309629	-7.27137	chr19	11395903	-	FALSE	mm|19qA	109225	NM_001025610	membrane-spanning 4-domains, subfamily A, member 7	chr19:11395962-11395903		NM_001025610	Mm.193094
A_52_P222230		Mus musculus adult male aorta and vein cDNA, RIKEN full-length enriched library, clone:A530041D01 product:unclassifiable, full insert sequence. [AK040896]	6.53877	down	1.67997	4.38899	chr13	67992543	-	FALSE	mm|13qB3		AK040896		chr13:67992602-67992543			Mm.426445
A_52_P161495	Bcl6	Mus musculus B-cell leukemia/lymphoma 6 (Bcl6), mRNA [NM_009744]	6.46488	up	-1.16584	-3.85847	chr16	23965160	-	FALSE	mm|16qB1	12053	NM_009744	B-cell leukemia/lymphoma 6	chr16:23965219-23965160	GO:0005515|GO:0030308|GO:0003700|GO:0008285|GO:0030036|GO:0030890|GO:0035024|GO:0005634|GO:0048294|GO:0007266|GO:0007283|GO:0046872|GO:0005622|GO:0042092|GO:0043380|GO:0008104|GO:0002829|GO:0048821|GO:0042127|GO:0030183|GO:0032319|GO:0002467|GO:0000060|GO:0032764|GO:0043066|GO:0006355|GO:0043065|GO:0050727|GO:0000122|GO:0003676|GO:0003677|GO:0031490|GO:0006351|GO:0006974|GO:0043565|GO:0000902|GO:…	NM_009744	Mm.347398
A_55_P2032643	Ajap1	Mus musculus adherens junction associated protein 1 (Ajap1), mRNA [NM_001099299]	9.50596	up	-1.41728	-4.66611	chr4	152756374	-	FALSE	mm|4qE2	230959	NM_001099299	adherens junction associated protein 1	chr4:152756433-152756374	GO:0008150|GO:0003674|GO:0030054|GO:0016020|GO:0005886|GO:0016021|GO:0005575|GO:0007155	NM_001099299	Mm.318874
A_55_P1998612		uy19a02.y1 McCarrey Eddy spermatocytes Mus musculus cDNA clone IMAGE:3658274 5'. [BG101066]	20.1041	down	-7.91907	-3.58965	chr19	21632298	+	FALSE	mm|19qB		BG101066		chr19:21632298-21632357			Mm.484016
A_55_P2039699	Camp	Mus musculus cathelicidin antimicrobial peptide (Camp), mRNA [NM_009921]	13.0214	up	-0.566867	-4.26968	chr9	109749911	-	FALSE	mm|9qF2	12796	NM_009921	cathelicidin antimicrobial peptide	chr9:109749970-109749911	GO:0051873|GO:0008284|GO:0050830|GO:0042581|GO:0005576|GO:0006952|GO:0042995|GO:0005615|GO:0045766|GO:0050829|GO:0005737|GO:0001934|GO:0044130|GO:0044140|GO:0042742	NM_009921	Mm.3834
A_51_P498631	Dfna5	Mus musculus deafness, autosomal dominant 5 (human) (Dfna5), mRNA [NM_018769]	6.83184	up	-2.04948	-4.82176	chr6	50157436	-	FALSE	mm|6qB2.3	54722	NM_018769	deafness, autosomal dominant 5 (human)	chr6:50157495-50157436	GO:0060113|GO:0007605|GO:0005575	NM_018769	Mm.485919
A_55_P2096043	Acot11	Mus musculus acyl-CoA thioesterase 11 (Acot11), mRNA [NM_025590]	8.90434	up	0.295727	-2.85878	chr4	106417185	-	FALSE	mm|4qC7	329910	NM_025590	acyl-CoA thioesterase 11	chr4:106417244-106417185	GO:0035556|GO:0004091|GO:0005737|GO:0016787|GO:0016291|GO:0008152|GO:0006631	NM_025590	Mm.222956
A_55_P2148285			5.72486	up	-3.68639	-6.20363	chrY_random	40996421	-	FALSE					chrY_random:040996480-040996421
A_51_P261999	2410075B13Rik	Mus musculus RIKEN cDNA 2410075B13 gene (2410075B13Rik), transcript variant 2, mRNA [NM_001163518]	16.6008	up	-1.68587	-5.73905	chr15	75811172	-	FALSE	mm|15qD3	223648	NM_001163518	RIKEN cDNA 2410075B13 gene	chr15:75811231-75811172	GO:0008150|GO:0003674|GO:0005575	NM_001163518	Mm.17610
A_55_P2090617	Pilra	Mus musculus paired immunoglobin-like type 2 receptor alpha (Pilra), mRNA [NM_153510]	12.8223	up	-2.44492	-6.12551	chr5	138276560	-	FALSE	mm|5qG2	231805	NM_153510	paired immunoglobin-like type 2 receptor alpha	chr5:138276619-138276560	GO:0005515|GO:0007165|GO:0016020|GO:0004872|GO:0016021	NM_153510	Mm.379385
A_55_P2007220	F630028O10Rik	Mus musculus RIKEN cDNA F630028O10 gene (F630028O10Rik), non-coding RNA [NR_030718]	5.57647	up	-5.42891	-7.90827	chrX	93437413	+	FALSE	mm|XqC3	100038363	NR_030718	RIKEN cDNA F630028O10 gene	chrX:93437413-93437472	GO:0008150|GO:0003674|GO:0005575	NR_030718	Mm.30815
A_51_P390538	Mpeg1	Mus musculus macrophage expressed gene 1 (Mpeg1), mRNA [NM_010821]	50.623	up	2.76639	-2.89534	chr19	12539387	+	FALSE	mm|19qA	17476	NM_010821	macrophage expressed gene 1	chr19:12539387-12539446	GO:0016020|GO:0016021	NM_010821	Mm.3999
A_55_P1998421			7.33907	up	-2.8973	-5.7729	chr4	86272619	-	FALSE	mm|4qC4				chr4:086272678-086272619
A_55_P2176838	Mitf	Mus musculus microphthalmia-associated transcription factor (Mitf), transcript variant 1, mRNA [NM_001113198]	6.32243	up	-0.984623	-3.6451	chr6	97971229	+	FALSE	mm|6qD3	17342	NM_001113198	microphthalmia-associated transcription factor	chr6:97971229-97971288	GO:0010468|GO:0003700|GO:0006366|GO:0003705|GO:0005634|GO:0030154|GO:0046849|GO:0042127|GO:0045944|GO:0043010|GO:0016055|GO:0006355|GO:0043066|GO:0030316|GO:0007275|GO:0030318|GO:0042981|GO:0045670|GO:0003677|GO:0006351|GO:0043565|GO:0045165|GO:0003682|GO:0043473|GO:0045893	NM_001113198	Mm.333284
A_51_P479818	Lonrf3	Mus musculus LON peptidase N-terminal domain and ring finger 3 (Lonrf3), mRNA [NM_028894]	31.4183	up	-2.80848	-7.78201	chrX	33902253	+	FALSE	mm|XqA3.3	74365	NM_028894	LON peptidase N-terminal domain and ring finger 3	chrX:33902253-33902312	GO:0008150|GO:0003674|GO:0005488|GO:0004176|GO:0006508|GO:0008270|GO:0005575|GO:0046872	NM_028894	Mm.327654
A_55_P2146560	H2-Ab1	Mus musculus histocompatibility 2, class II antigen A, beta 1 (H2-Ab1), mRNA [NM_207105]	235.254	up	2.99988	-4.87819	chr17	34406305	+	FALSE	mm|17qB1	14961	NM_207105	histocompatibility 2, class II antigen A, beta 1	chr17:34406305-34406363	GO:0005515|GO:0046635|GO:0005886|GO:0048002|GO:0005622|GO:0019886|GO:0006955|GO:0019882|GO:0002827|GO:0042605|GO:0070491|GO:0002344|GO:0031625|GO:0005794|GO:0005771|GO:0002504|GO:0042613|GO:0002579|GO:0016020|GO:0071346|GO:0015643|GO:0016021|GO:0009897|GO:0005769|GO:0008134	NM_207105	Mm.254067
A_66_P110343	Snx10	Mus musculus sorting nexin 10 (Snx10), transcript variant 1, mRNA [NM_028035]	8.17065	up	-0.654684	-3.68514	chr6	51539004	+	FALSE	mm|6qB3	71982	NM_028035	sorting nexin 10	chr6:51539004-51539063	GO:0005545|GO:0005737|GO:0007154|GO:0016020|GO:0031313|GO:0006810|GO:0007032|GO:0035091|GO:0015031|GO:0008289|GO:0005768	NM_028035	Mm.294166
A_51_P249215	Ptger2	Mus musculus prostaglandin E receptor 2 (subtype EP2) (Ptger2), mRNA [NM_008964]	5.12364	up	-2.77497	-5.13214	chr14	45622004	+	FALSE	mm|14qC1	19217	NM_008964	prostaglandin E receptor 2 (subtype EP2)	chr14:45622004-45622063	GO:0007165|GO:0016020|GO:0007186|GO:0005886|GO:0004930|GO:0042127|GO:0004872|GO:0016021|GO:0004871|GO:0004957	NM_008964	Mm.4630
A_55_P2032449	Kif1a	Mus musculus kinesin family member 1A (Kif1a), transcript variant 1, mRNA [NM_008440]	6.04161	down	-7.31092	-4.71598	chr1	94915009	-	FALSE	mm|1qD	16560	NM_008440	kinesin family member 1A	chr1:94915068-94915009	GO:0005737|GO:0000166|GO:0005874|GO:0005634|GO:0005524	NM_008440	Mm.276408
A_52_P674759	Btbd3	Mus musculus BTB (POZ) domain containing 3 (Btbd3), transcript variant 1, mRNA [NM_145534]	6.46099	up	-5.16489	-7.85664	chr2	138113019	+	FALSE	mm|2qF3	228662	NM_145534	BTB (POZ) domain containing 3	chr2:138113019-138113078	GO:0008150|GO:0003674|GO:0005575	NM_145534	Mm.153405
A_55_P2032718	Klra9	Mus musculus killer cell lectin-like receptor subfamily A, member 9 (Klra9), mRNA [NM_010651]	6.42673	up	-5.25842	-7.94251	chr6	130139716	-	FALSE	mm|6qF3	16640	NM_010651	killer cell lectin-like receptor subfamily A, member 9	chr6:130139775-130139716	GO:0007165|GO:0016020|GO:0005886|GO:0005488|GO:0005529|GO:0004872|GO:0016021|GO:0007155	NM_010651	Mm.457996
A_55_P2004752	Prl2c5	Mus musculus prolactin family 2, subfamily c, member 5 (Prl2c5), mRNA [NM_181852]	7.29335	up	-1.3904	-4.25698	chr13	13283943	+	FALSE	mm|13qA1	107849	NM_181852	prolactin family 2, subfamily c, member 5	chr13:13283943-13284002	GO:0008150|GO:0003674|GO:0005179|GO:0005615	NM_181852	Mm.392548
A_51_P494825	Mfhas1	Mus musculus malignant fibrous histiocytoma amplified sequence 1 (Mfhas1), mRNA [NM_001081279]	13.0641	up	-2.81745	-6.52498	chr8	36742382	+	FALSE	mm|8qA4	52065	NM_001081279	malignant fibrous histiocytoma amplified sequence 1	chr8:36742382-36742441	GO:0008150|GO:0003674|GO:0005575	NM_001081279	Mm.103246
A_66_P106385	Daf2	Mus musculus decay accelerating factor 2 (Daf2), mRNA [NM_007827]	5.96063	down	-4.81101	-2.23555	chr1	132307236	-	FALSE	mm|1qE4	13137	NM_007827	decay accelerating factor 2	chr1:132307996-132307236		NM_007827	Mm.436759
A_51_P286748	Frzb	Mus musculus frizzled-related protein (Frzb), mRNA [NM_011356]	7.76904	down	-3.40698	-0.449238	chr2	80252582	-	FALSE	mm|2qC3	20378	NM_011356	frizzled-related protein	chr2:80252641-80252582	GO:0008406|GO:0005515|GO:0017147|GO:0030308|GO:0008285|GO:0030178|GO:0005615|GO:0030154|GO:0060029|GO:0005737|GO:0090103|GO:0016055|GO:0090090|GO:0001944|GO:0042813|GO:0010721|GO:0042472|GO:0043065|GO:0006357|GO:0060056|GO:0007275|GO:0005576|GO:0030165|GO:0070367|GO:0007420|GO:0045600|GO:0061037	NM_011356	Mm.427436
A_55_P2129348	Pilra	Mus musculus paired immunoglobin-like type 2 receptor alpha (Pilra), mRNA [NM_153510]	33.0876	up	-1.06584	-6.11406	chr5	138263180	-	FALSE	mm|5qG2	231805	NM_153510	paired immunoglobin-like type 2 receptor alpha	chr5:138263239-138263180	GO:0005515|GO:0007165|GO:0016020|GO:0004872|GO:0016021	NM_153510	Mm.379385
A_55_P1974178	Pyhin1	Mus musculus pyrin and HIN domain family, member 1 (Pyhin1), mRNA [NM_175026]	7.47998	up	-5.00036	-7.9034	chr1	175576564	+	FALSE	mm|1qH3	236312	NM_175026	pyrin and HIN domain family, member 1	chr1:175576564-175576623	GO:0003674|GO:0035458|GO:0005634|GO:0005575	NM_175026	Mm.447
A_55_P2165554		predicted gene 10718 [Source:MGI Symbol;Acc:MGI:3642028] [ENSMUST00000099046]	8.57398	up	0.793473	-2.30649	chr9	3024224	+	FALSE	mm|9qA1				chr9:3024224-3024283
A_55_P2138100		predicted gene 10720 [Source:MGI Symbol;Acc:MGI:3641687] [ENSMUST00000099050]	5.93809	up	1.78899	-0.78101	chr9	3003722	+	FALSE	mm|9qA1				chr9:3003722-3003781
A_51_P500082	Gm14446	Mus musculus predicted gene 14446 (Gm14446), transcript variant 1, mRNA [NM_001110517]	15.2846	up	-4.03384	-7.96785	chr19	34667950	-	FALSE	mm|19qC1	667373	NM_001110517	predicted gene 14446	chr19:34668009-34667950	GO:0008150|GO:0003674|GO:0005575	NM_001110517	Mm.371956
A_55_P1964325	Klrb1b	Mus musculus killer cell lectin-like receptor subfamily B member 1B (Klrb1b), mRNA [NM_030599]	6.99559	up	-3.87808	-6.68453	chr6	128763847	-	FALSE	mm|6qF3	80782	NM_030599	killer cell lectin-like receptor subfamily B member 1B	chr6:128763906-128763847	GO:0005515|GO:0007165|GO:0016020|GO:0005887|GO:0005488|GO:0045953|GO:0005529|GO:0004872|GO:0016021|GO:0042803|GO:0009897	NM_030599	Mm.6180
A_55_P2001274		predicted gene 9235 [Source:MGI Symbol;Acc:MGI:3648544] [ENSMUST00000103532]	7.03833	up	-1.24873	-4.06396	chr12	116699334	-	FALSE	mm|12qF2		AY114394		chr12:116699393-116699334			Mm.304472
A_55_P2140240		Mus musculus 2 days pregnant adult female oviduct cDNA, RIKEN full-length enriched library, clone:E230013G23 product:unclassifiable, full insert sequence. [AK054031]	9.01798	up	-4.28922	-7.46202	chr14	28097418	+	FALSE	mm|14qA3		AK054031		chr14:28097418-28097477			Mm.454331
A_66_P128342		Mus musculus mRNA for T-Cell receptor alpha chain (TRAV gene), 5'UTR. [AJ311366]	5.22518	down	-5.19098	-2.8055	chr14	53200353	+	FALSE	mm|14qC2		AJ311366		chr14:53200353-53200412			Mm.308293
A_55_P2148062	Apol7c	Mus musculus apolipoprotein L 7c (Apol7c), mRNA [NM_175391]	6.1392	up	-4.20158	-6.81963	chr15	77356343	-	FALSE	mm|15qE1	108956	NM_175391	apolipoprotein L 7c	chr15:77356402-77356343	GO:0005575	NM_175391	Mm.86391
A_52_P118560	Kynu	Mus musculus kynureninase (L-kynurenine hydrolase) (Kynu), mRNA [NM_027552]	11.2106	up	-3.97997	-7.46676	chr2	43537195	+	FALSE	mm|2qB	70789	NM_027552	kynureninase (L-kynurenine hydrolase)	chr2:43537195-43537254	GO:0006569|GO:0030429|GO:0005625|GO:0019363|GO:0034516|GO:0003824|GO:0043420|GO:0042803|GO:0005829|GO:0005739|GO:0005737|GO:0019805|GO:0016787|GO:0019441|GO:0030170|GO:0008152|GO:0034341|GO:0009435|GO:0019442	NM_027552	Mm.105278
A_51_P427171	9030625A04Rik	Mus musculus RIKEN cDNA 9030625A04 gene (9030625A04Rik), mRNA [NM_172488]	8.87741	up	-4.61494	-7.76508	chr14	77424492	-	FALSE	mm|14qD3	210808	NM_172488	RIKEN cDNA 9030625A04 gene	chr14:77424551-77424492	GO:0008150|GO:0003674|GO:0005575	NM_172488	Mm.89278
A_52_P559566		predicted gene, 16791 [Source:MGI Symbol;Acc:MGI:4439715] [ENSMUST00000103527]	5.63555	up	-1.04658	-3.54114	chr12	116481197	-	FALSE	mm|12qF2				chr12:116481256-116481197
A_52_P90363	Ifi27l2a	Mus musculus interferon, alpha-inducible protein 27 like 2A (Ifi27l2a), mRNA [NM_029803]	5.64163	up	2.46016	-0.0359569	chr12	104680394	-	FALSE	mm|12qE	76933	NM_029803	interferon, alpha-inducible protein 27 like 2A	chr12:104680453-104680394	GO:0003674|GO:0007568|GO:0005575|GO:0009615	NM_029803	Mm.271275
A_55_P1971991	1810019J16Rik	Mus musculus RIKEN cDNA 1810019J16 gene (1810019J16Rik), transcript variant 1, mRNA [NM_001083916]	5.20864	up	-5.15013	-7.53104	chr4	133086643	+	FALSE	mm|4qD2.3	69073	NM_001083916	RIKEN cDNA 1810019J16 gene	chr4:133086643-133086702	GO:0008150|GO:0003674|GO:0005575	NM_001083916	Mm.299081
A_51_P267278	Slc15a2	Mus musculus solute carrier family 15 (H+/peptide transporter), member 2 (Slc15a2), transcript variant 1, mRNA [NM_021301]	48.1582	up	-2.39013	-7.97984	chr16	36750603	-	FALSE	mm|16qB3	57738	NM_021301	solute carrier family 15 (H+/peptide transporter), member 2	chr16:36750662-36750603	GO:0006857|GO:0005887|GO:0042891|GO:0006810|GO:0005624|GO:0016021|GO:0042895|GO:0042936|GO:0015334|GO:0042938	NM_021301	Mm.281804
A_51_P140710	Ccl3	Mus musculus chemokine (C-C motif) ligand 3 (Ccl3), mRNA [NM_011337]	7.19539	up	3.39315	0.546082	chr11	83461358	-	FALSE	mm|11qC	20302	NM_011337	chemokine (C-C motif) ligand 3	chr11:83461417-83461358	GO:0005515|GO:0008009|GO:0030595|GO:0030593|GO:0045672|GO:0005576|GO:0005625|GO:0005125|GO:0005615|GO:0007204|GO:0042056|GO:0050918|GO:0006955|GO:0006954|GO:0006935	NM_011337	Mm.1282
A_52_P562158		predicted gene, 16811 [Source:MGI Symbol;Acc:MGI:4439735] [ENSMUST00000103544]	21.7293	up	-0.279503	-4.72107	chr12	117072253	-	FALSE	mm|12qF2		AF296435		chr12:117072312-117072253			Mm.305376
A_52_P300730	Hmga2	Mus musculus high mobility group AT-hook 2 (Hmga2), mRNA [NM_010441]	78.0099	up	2.67651	-3.60907	chr10	119798739	-	FALSE	mm|10qD2	15364	NM_010441	high mobility group AT-hook 2	chr10:119798798-119798739	GO:0005515|GO:0006355|GO:0033144|GO:0005634|GO:0000122|GO:0000228|GO:0003677|GO:0046426|GO:0006351|GO:0007165|GO:0051091|GO:0007049|GO:0007067|GO:0019899|GO:0000785|GO:0040008|GO:0051301	NM_010441	Mm.157190
A_55_P2108943	Ccr6	Mus musculus chemokine (C-C motif) receptor 6 (Ccr6), transcript variant 1, mRNA [NM_009835]	14.3313	up	-0.557065	-4.39816	chr17	8449933	+	FALSE	mm|17qA1	12458	NM_009835	chemokine (C-C motif) receptor 6	chr17:8449933-8449992	GO:0005515|GO:0007165|GO:0016020|GO:0007186|GO:0005886|GO:0004930|GO:0004950|GO:0016493|GO:0004872|GO:0016021|GO:0004871	NM_009835	Mm.8007
A_51_P401907	Gm5483	Mus musculus predicted gene 5483 (Gm5483), mRNA [NM_001082547]	115.597	up	-0.45071	-7.30367	chr16	36188043	+	FALSE	mm|16qB3	433016	NM_001082547	predicted gene 5483	chr16:36188043-36188102	GO:0010951|GO:0005737|GO:0018149|GO:0004869|GO:0030216|GO:0005198|GO:0010466|GO:0005634|GO:0030674|GO:0030414|GO:0002020|GO:0001533	NM_001082547	Mm.235340
A_52_P527800	Emilin2	Mus musculus elastin microfibril interfacer 2 (Emilin2), mRNA [NM_145158]	24.2413	up	2.05664	-2.54275	chr17	71601638	-	FALSE	mm|17qE1.3	246707	NM_145158	elastin microfibril interfacer 2	chr17:71601697-71601638	GO:0005581|GO:0005578|GO:0005576|GO:0007155	NM_145158	Mm.23462
A_55_P2067583	Cd68	Mus musculus CD68 antigen (Cd68), mRNA [NM_009853]	9.55108	up	-2.95152	-6.20718	chr11	69478979	-	FALSE	mm|11qB3	12514	NM_009853	CD68 antigen	chr11:69479038-69478979	GO:0016020|GO:0005886|GO:0016021|GO:0005764|GO:0005768	NM_009853	Mm.15819
A_55_P2113081	Tmem132a	Mus musculus transmembrane protein 132A (Tmem132a), mRNA [NM_133804]	5.69171	up	0.501458	-2.0074	chr19	10932324	-	FALSE	mm|19qA	98170	NM_133804	transmembrane protein 132A	chr19:10932383-10932324	GO:0043069|GO:0005794|GO:0016020|GO:0005783|GO:0016021	NM_133804	Mm.27387
A_51_P391727	Slc3a1	Mus musculus solute carrier family 3, member 1 (Slc3a1), mRNA [NM_009205]	8.00889	down	-6.5816	-3.57999	chr17	85463142	+	FALSE	mm|17qE4	20532	NM_009205	solute carrier family 3, member 1	chr17:85463142-85463201	GO:0005774|GO:0046982|GO:0005886|GO:0005887|GO:0006865|GO:0005743	NM_009205	Mm.227176
A_51_P465740	Lysmd4	Mus musculus LysM, putative peptidoglycan-binding, domain containing 4 (Lysmd4), transcript variant B, mRNA [NM_175215]	17.91	up	-3.70751	-7.8702	chr7	74372992	+	FALSE	mm|7qC	75099	NM_175215	LysM, putative peptidoglycan-binding, domain containing 4	chr7:74372992-74373051	GO:0008150|GO:0003674|GO:0016020|GO:0016998|GO:0016021|GO:0005575	NM_175215	Mm.121691
A_51_P237668	Bex2	Mus musculus brain expressed X-linked 2 (Bex2), mRNA [NM_009749]	16.2729	up	-3.86639	-7.89079	chrX	132601237	-	FALSE	mm|XqF1	12069	NM_009749	brain expressed X-linked 2	chrX:132601296-132601237	GO:0007049|GO:0005737|GO:0051726|GO:0006915|GO:0042981|GO:0005634	NM_009749	Mm.94160
A_51_P115715	Asb2	Mus musculus ankyrin repeat and SOCS box-containing 2 (Asb2), mRNA [NM_023049]	5.49982	up	-3.89304	-6.35243	chr12	104559752	-	FALSE	mm|12qE	65256	NM_023049	ankyrin repeat and SOCS box-containing 2	chr12:104559811-104559752	GO:0035556|GO:0008150|GO:0003674|GO:0005575	NM_023049	Mm.27159
A_55_P1954718	Cyb561	Mus musculus cytochrome b-561 (Cyb561), mRNA [NM_007805]	16.656	up	-1.77753	-5.8355	chr11	105795018	-	FALSE	mm|11qE1	13056	NM_007805	cytochrome b-561	chr11:105795077-105795018	GO:0016020|GO:0000293|GO:0006810|GO:0031410|GO:0016021|GO:0022900|GO:0046872|GO:0055114	NM_007805	Mm.149403
A_55_P2465382		predicted gene 10800 [Source:MGI Symbol;Acc:MGI:3641657] [ENSMUST00000099683]	6.98976	up	1.39161	-1.41363	chr2	98507096	-	FALSE	mm|2qE1		AK172117		chr2:98507154-98507096
A_52_P148514	Hpse	Mus musculus heparanase (Hpse), mRNA [NM_152803]	5.50986	up	-4.11349	-6.57551	chr5	101114085	-	FALSE	mm|5qE4	15442	NM_152803	heparanase	chr5:101114144-101114085	GO:0005975|GO:0043169|GO:0030305|GO:0005578|GO:0005576|GO:0005634|GO:0003824|GO:0005764|GO:0016020|GO:0016787|GO:0016798|GO:0008152|GO:0007155	NM_152803	Mm.265786
A_66_P125828		predicted pseudogene 6684 [Source:MGI Symbol;Acc:MGI:3643522] [ENSMUST00000053717]	5.60523	up	-3.39939	-5.88616	chr19	20660643	-	FALSE	mm|19qB				chr19:20660702-20660643
A_55_P2156219	Gm10549	Mus musculus 0 day neonate cerebellum cDNA, RIKEN full-length enriched library, clone:C230022F01 product:hypothetical protein, full insert sequence. [AK141051]	5.28541	down	-7.79967	-5.39766	chr18	33634286	+	FALSE	mm|18qB1	433171	AK141051	predicted gene 10549	chr18:33634286-33634345	GO:0008150|GO:0003674|GO:0005575		Mm.353332
A_51_P380005	Galnt3	Mus musculus UDP-N-acetyl-alpha-D-galactosamine:polypeptide N-acetylgalactosaminyltransferase 3 (Galnt3), mRNA [NM_015736]	106.149	up	-1.15703	-7.88698	chr2	65921662	-	FALSE	mm|2qC1.3	14425	NM_015736	UDP-N-acetyl-alpha-D-galactosamine:polypeptide N-acetylgalactosaminyltransferase 3	chr2:65921721-65921662	GO:0048471|GO:0005794|GO:0030145|GO:0016757|GO:0005509|GO:0005529|GO:0005634|GO:0004653|GO:0005737|GO:0016020|GO:0018242|GO:0018243|GO:0016021|GO:0016740	NM_015736	Mm.439760
A_55_P2048279	Tlr13	Mus musculus toll-like receptor 13 (Tlr13), mRNA [NM_205820]	6.53493	up	-0.140517	-2.84869	chrX	103355773	+	FALSE	mm|XqD	279572	NM_205820	toll-like receptor 13	chrX:103355773-103355832	GO:0005515|GO:0008150|GO:0007165|GO:0006954|GO:0016020|GO:0045087|GO:0031224|GO:0004872|GO:0016021|GO:0005575|GO:0004888	NM_205820	Mm.336203
A_51_P278868	H2-DMb1	Mus musculus histocompatibility 2, class II, locus Mb1 (H2-DMb1), mRNA [NM_010387]	15.7854	up	0.160667	-3.81986	chr17	34297109	+	FALSE	mm|17qB1	14999	NM_010387	histocompatibility 2, class II, locus Mb1	chr17:34297109-34297168	GO:0019886|GO:0016020|GO:0005886|GO:0019882|GO:0002504|GO:0051085|GO:0042613|GO:0016021	NM_010387	Mm.460938
A_51_P281089	S100a6	Mus musculus S100 calcium binding protein A6 (calcyclin) (S100a6), mRNA [NM_011313]	6.26454	up	4.19183	1.54462	chr3	90418160	+	FALSE	mm|3qF1	20200	NM_011313	S100 calcium binding protein A6 (calcyclin)	chr3:90418160-90418219	GO:0005515|GO:0048471|GO:0005886|GO:0015075|GO:0005509|GO:0005634|GO:0005635|GO:0001726|GO:0048154|GO:0046872|GO:0042803|GO:0005829|GO:0031234|GO:0005737|GO:0034220|GO:0016020|GO:0005523|GO:0048306	NM_011313	Mm.100144
A_55_P2171116	Lgals3	Mus musculus lectin, galactose binding, soluble 3 (Lgals3), transcript variant 1, mRNA [NM_001145953]	78.0716	up	4.67043	-1.6163	chr14	48005414	+	FALSE	mm|14qC1	16854	NM_001145953	lectin, galactose binding, soluble 3	chr14:48005414-48005473	GO:0005515|GO:0005737|GO:0001501|GO:0030198|GO:0005743|GO:0005578|GO:0005529|GO:0005634	NM_001145953	Mm.248615
A_55_P2018403	Sycp1	Mus musculus synaptonemal complex protein 1 (Sycp1), mRNA [NM_011516]	9.30996	down	-7.69795	-4.47917	chr3	102622573	-	FALSE	mm|3qF2.2	20957	NM_011516	synaptonemal complex protein 1	chr3:102622632-102622573	GO:0032880|GO:0005515|GO:0000795|GO:0000802|GO:0005634|GO:0000801|GO:0001673	NM_011516	Mm.243849
A_55_P2133427	Vkorc1	Mus musculus vitamin K epoxide reductase complex, subunit 1 (Vkorc1), mRNA [NM_178600]	6.50873	up	-0.467484	-3.16986	chr7	135036796	-	FALSE	mm|7qF3	27973	NM_178600	vitamin K epoxide reductase complex, subunit 1	chr7:135036855-135036796	GO:0005792|GO:0014070|GO:0005783|GO:0010243|GO:0050820|GO:0016020|GO:0030193|GO:0016491|GO:0016021|GO:0042371|GO:0047057|GO:0042373|GO:0046677|GO:0055114|GO:0047058	NM_178600	Mm.29703
A_51_P302358	Ltb	Mus musculus lymphotoxin B (Ltb), mRNA [NM_008518]	7.8079	up	2.4983	-0.466633	chr17	35333097	+	FALSE	mm|17qB1	16994	NM_008518	lymphotoxin B	chr17:35333097-35333156	GO:0010467|GO:0005164|GO:0006955|GO:0045084|GO:0016020|GO:0005886|GO:0043588|GO:0016021|GO:0005615|GO:0005125|GO:0048535	NM_008518	Mm.1715
A_55_P2234084	AU022229	Mus musculus 10 days neonate medulla oblongata cDNA, RIKEN full-length enriched library, clone:B830020B14 product:unclassifiable, full insert sequence. [AK046833]	26.5342	up	-3.16899	-7.89877	chr8	9474129	-	FALSE	mm|8qA1.1	102234	AK046833	expressed sequence AU022229	chr8:009474187-009474129			Mm.394877
A_55_P1971962	Tmem176b	Mus musculus transmembrane protein 176B (Tmem176b), transcript variant 1, mRNA [NM_023056]	6.25252	up	-1.34452	-3.98896	chr6	48788172	-	FALSE	mm|6qB2.3	65963	NM_023056	transmembrane protein 176B	chr6:48788231-48788172	GO:0016020|GO:0005634|GO:0016021|GO:0030154	NM_023056	Mm.28385
A_55_P2008438	Cdkn2a	Mus musculus cyclin-dependent kinase inhibitor 2A (Cdkn2a), transcript variant 1, mRNA [NM_009877]	17.0677	down	-7.77932	-3.68612	chr4	88920543	-	FALSE	mm|4qC4	12578	NM_009877	cyclin-dependent kinase inhibitor 2A	chr4:88920602-88920543	GO:0005515|GO:0010468|GO:0033088|GO:0014070|GO:0030308|GO:0003700|GO:0001652|GO:0006364|GO:0009303|GO:0071158|GO:0070534|GO:0008637|GO:0051444|GO:0055105|GO:0000209|GO:0019901|GO:0007569|GO:0010389|GO:0007568|GO:0010243|GO:0030889|GO:0045786|GO:0043234|GO:0007049|GO:0008544|GO:0000075|GO:0005654|GO:0045893|GO:0090398|GO:0001953|GO:0008134|GO:0048103|GO:0008285|GO:0045736|GO:0005634|GO:0000079|GO:…	NM_009877	Mm.4733
A_55_P1985850	Timp1	Mus musculus tissue inhibitor of metalloproteinase 1 (Timp1), transcript variant 1, mRNA [NM_001044384]	5.37964	up	-1.71893	-4.14644	chrX	20451802	+	FALSE	mm|XqA1.3	21857	NM_001044384	tissue inhibitor of metalloproteinase 1	chrX:20451802-20451861	GO:0031012|GO:0004857|GO:0043066|GO:0051045|GO:0043249|GO:0008191|GO:0005578|GO:0005576|GO:0043086|GO:0046872|GO:0001775|GO:0005604	NM_001044384	Mm.8245
A_52_P504268	B3galnt1	Mus musculus UDP-GalNAc:betaGlcNAc beta 1,3-galactosaminyltransferase, polypeptide 1 (B3galnt1), mRNA [NM_020026]	5.27429	up	-5.55289	-7.95186	chr3	69378149	-	FALSE	mm|3qE1	26879	NM_020026	UDP-GalNAc:betaGlcNAc beta 1,3-galactosaminyltransferase, polypeptide 1	chr3:69378208-69378149	GO:0009312|GO:0005794|GO:0016020|GO:0016757|GO:0008499|GO:0006486|GO:0016021|GO:0047273|GO:0008378|GO:0016740	NM_020026	Mm.153710
A_55_P2026632	Pilrb1	Mus musculus paired immunoglobin-like type 2 receptor beta 1 (Pilrb1), mRNA [NM_133209]	11.8377	up	-4.14735	-7.71267	chr5	138298405	-	FALSE	mm|5qG2	170741	NM_133209	paired immunoglobin-like type 2 receptor beta 1	chr5:138298464-138298405	GO:0005515|GO:0008150|GO:0016020|GO:0016021|GO:0005575	NM_133209	Mm.347593
A_52_P239536	Ppp1r9a	Mus musculus protein phosphatase 1, regulatory (inhibitor) subunit 9A (Ppp1r9a), mRNA [NM_181595]	15.1683	up	-3.84706	-7.77004	chr6	5114866	+	FALSE	mm|6qA1	243725	NM_181595	protein phosphatase 1, regulatory (inhibitor) subunit 9A	chr6:5114866-5114925	GO:0005515|GO:0043197|GO:0007015|GO:0030864|GO:0030175|GO:0005856|GO:0031175|GO:0030426	NM_181595	Mm.332901
A_55_P2232057	AU022793	Mus musculus NOD-derived CD11c +ve dendritic cells cDNA, RIKEN full-length enriched library, clone:F630305H02 product:unclassifiable, full insert sequence. [AK155489]	22.7293	up	-3.43603	-7.94252	chr15	39798504	+	FALSE	mm|15qB3.1	105976	AK155489	expressed sequence AU022793	chr15:39798504-39798563	GO:0008150|GO:0003674|GO:0005575		Mm.394885
A_51_P151484	Atp1b1	Mus musculus ATPase, Na+/K+ transporting, beta 1 polypeptide (Atp1b1), mRNA [NM_009721]	19.5244	up	-1.1486	-5.43581	chr1	166368263	-	FALSE	mm|1qH2.2	11931	NM_009721	ATPase, Na+/K+ transporting, beta 1 polypeptide	chr1:166368322-166368263	GO:0005515|GO:0001666|GO:0005886|GO:0005890|GO:0030001|GO:0016323|GO:0016324|GO:0006754|GO:0034220|GO:0016020|GO:0005901|GO:0006810|GO:0016021|GO:0006814|GO:0006813|GO:0005391|GO:0006811	NM_009721	Mm.4550
A_52_P257625	Esm1	Mus musculus endothelial cell-specific molecule 1 (Esm1), mRNA [NM_023612]	7.71825	down	0.733919	3.68219	chr13	114008204	+	FALSE	mm|13qD2.2	71690	NM_023612	endothelial cell-specific molecule 1	chr13:114008204-114008263	GO:0008150|GO:0003674|GO:0005576|GO:0005575|GO:0001558|GO:0005520	NM_023612	Mm.38929
A_51_P199135	Cd83	Mus musculus CD83 antigen (Cd83), mRNA [NM_009856]	212.01	up	-0.212373	-7.94036	chr13	43898276	+	FALSE	mm|13qA4	12522	NM_009856	CD83 antigen	chr13:43898276-43898335	GO:0014070|GO:0032733|GO:0016020|GO:0032743|GO:0043372|GO:0032713|GO:0016021|GO:0009897	NM_009856	Mm.57175
A_51_P389988	Slc40a1	Mus musculus solute carrier family 40 (iron-regulated transporter), member 1 (Slc40a1), mRNA [NM_016917]	37.6763	up	-1.74163	-6.97722	chr1	45965255	-	FALSE	mm|1qC1.1	53945	NM_016917	solute carrier family 40 (iron-regulated transporter), member 1	chr1:45965314-45965255	GO:0005515|GO:0005886|GO:0003158|GO:0006915|GO:0048536|GO:0060586|GO:0055072|GO:0008021|GO:0060345|GO:0016020|GO:0005381|GO:0006810|GO:0006826|GO:0016021|GO:0002260|GO:0006811|GO:0034755	NM_016917	Mm.28756
A_52_P282741	Sdc3	Mus musculus syndecan 3 (Sdc3), mRNA [NM_011520]	5.69645	up	-1.58577	-4.09583	chr4	130382015	+	FALSE	mm|4qD2.3	20970	NM_011520	syndecan 3	chr4:130382015-130382074	GO:0008092|GO:0043234|GO:0030424|GO:0016020|GO:0016021|GO:0019717|GO:0007155	NM_011520	Mm.206536
A_51_P317214	Hpdl	Mus musculus 4-hydroxyphenylpyruvate dioxygenase-like (Hpdl), mRNA [NM_146256]	10.808	up	-3.14488	-6.5789	chr4	116492536	-	FALSE	mm|4qD1	242642	NM_146256	4-hydroxyphenylpyruvate dioxygenase-like	chr4:116492595-116492536	GO:0008150|GO:0003674|GO:0003868|GO:0016491|GO:0009072|GO:0005575|GO:0016702|GO:0046872|GO:0055114|GO:0016701	NM_146256	Mm.279897
A_55_P2405784	BC023202	Mus musculus 12 days embryo spinal cord cDNA, RIKEN full-length enriched library, clone:C530014B18 product:unclassifiable, full insert sequence. [AK141429]	6.88561	up	-5.10147	-7.88505	chr12	25649156	+	FALSE	mm|12qA1.3	407816	AK141429	cDNA sequence BC023202	chr12:25649156-25649215	GO:0008150|GO:0003674|GO:0005575		Mm.391606
A_52_P209119	Ncam2	Mus musculus neural cell adhesion molecule 2 (Ncam2), transcript variant 2, mRNA [NM_010954]	24.8339	down	-7.85273	-3.21849	chr16	81443408	+	FALSE	mm|16qC3.3	17968	NM_010954	neural cell adhesion molecule 2	chr16:81443408-81443467	GO:0030424|GO:0016020|GO:0005886|GO:0031225|GO:0016021|GO:0007155	NM_010954	Mm.433941
A_51_P279712	Rell1	Mus musculus RELT-like 1 (Rell1), mRNA [NM_145923]	5.07401	up	1.10108	-1.24205	chr5	64300927	-	FALSE	mm|5qC3.1	100532	NM_145923	RELT-like 1	chr5:64300986-64300927	GO:0008150|GO:0003674|GO:0005737|GO:0016020|GO:0005886|GO:0015630|GO:0016021	NM_145923	Mm.243632
A_55_P2088014	Cdc42ep4	Mus musculus CDC42 effector protein (Rho GTPase binding) 4 (Cdc42ep4), transcript variant 1, mRNA [NM_020006]	7.07026	up	0.425145	-2.39662	chr11	113588217	-	FALSE	mm|11qE2	56699	NM_020006	CDC42 effector protein (Rho GTPase binding) 4	chr11:113588276-113588217	GO:0005515|GO:0005737|GO:0016020|GO:0008360|GO:0015630|GO:0031274|GO:0007266|GO:0015629|GO:0005856	NM_020006	Mm.293378
A_66_P111562	Ccnd1	Mus musculus cyclin D1 (Ccnd1), mRNA [NM_007631]	52.8166	up	1.76061	-3.96231	chr7	152116202	-	FALSE	mm|7qF5	12443	NM_007631	cyclin D1	chr7:152116261-152116202	GO:0005515|GO:0008284|GO:0030178|GO:0045737|GO:0005634|GO:0071445|GO:0000079|GO:0032403|GO:0030968|GO:0005829|GO:0005622|GO:0005737|GO:0000082|GO:0030857|GO:0016301|GO:0051726|GO:0045444|GO:0016538|GO:0016055|GO:0060070|GO:0000320|GO:0019901|GO:0071310|GO:0010243|GO:0006974|GO:0070141|GO:0042325|GO:0033598|GO:0050790|GO:0007049|GO:0004672|GO:0007595|GO:0016020|GO:0000307|GO:0001934|GO:0033327|GO:…	NM_007631	Mm.273049
A_55_P2106180	Dnahc2	Mus musculus dynein, axonemal, heavy chain 2 (Dnahc2), mRNA [NM_001081330]	17.2149	up	-3.70031	-7.80589	chr11	69234345	-	FALSE	mm|11qB3	327954	NM_001081330	dynein, axonemal, heavy chain 2	chr11:69234404-69234345	GO:0017111|GO:0005874|GO:0042995|GO:0003777|GO:0005524|GO:0005929|GO:0003774|GO:0005737|GO:0000166|GO:0030286|GO:0005856|GO:0016887|GO:0007018	NM_001081330	Mm.247478
A_55_P2135526	Gzmc	Mus musculus granzyme C (Gzmc), mRNA [NM_010371]	8.44305	up	-1.9369	-5.01466	chr14	56850307	-	FALSE	mm|14qC3	14940	NM_010371	granzyme C	chr14:56850366-56850307	GO:0016787|GO:0004252|GO:0019835|GO:0006508|GO:0008236|GO:0008233|GO:0003824	NM_010371	Mm.14465
A_55_P2004507	Ifi203	Mus musculus interferon activated gene 203 (Ifi203), transcript variant 1, mRNA [NM_001045481]	8.83481	up	-4.47807	-7.62127	chr1	175851818	-	FALSE	mm|1qH3	15950	NM_001045481	interferon activated gene 203	chr1:175851877-175851818	GO:0035458|GO:0005634	NM_001045481	Mm.472787
A_51_P117865	Fam20c	Mus musculus family with sequence similarity 20, member C (Fam20c), mRNA [NM_030565]	10.1424	up	-1.39436	-4.73668	chr5	139285592	+	FALSE	mm|5qG2	80752	NM_030565	family with sequence similarity 20, member C	chr5:139285592-139285651	GO:0005576	NM_030565	Mm.320355
A_55_P2345631	Tcrg-V1	Mus musculus 16 days neonate thymus cDNA, RIKEN full-length enriched library, clone:A130095M15 product:unclassifiable, full insert sequence. [AK038325]	7.47969	down	-4.90074	-1.99776	chr13	19443911	+	FALSE	mm|13qA2	21632	AK038325	T-cell receptor gamma, variable 1	chr13:19443911-19443970			Mm.210785
A_52_P330694	Tle1	transducin-like enhancer of split 1, homolog of Drosophila E(spl) [Source:MGI Symbol;Acc:MGI:104636] [ENSMUST00000107337]	13.775	up	-2.16272	-5.9467	chr4	71818785	-	FALSE	mm|4qC3	21885	AY155196	transducin-like enhancer of split 1, homolog of Drosophila E(spl)	chr4:71818844-71818785	GO:0005515|GO:0005667|GO:0006355|GO:0006357|GO:0003714|GO:0005634|GO:0000122|GO:0006351|GO:0005737|GO:0003682|GO:0016055|GO:0045892|GO:0008134		Mm.278444
A_55_P2059110	Skap1	Mus musculus src family associated phosphoprotein 1 (Skap1), transcript variant 1, mRNA [NM_001033186]	5.72662	up	-5.393	-7.91068	chr11	96620198	+	FALSE	mm|11qD	78473	NM_001033186	src family associated phosphoprotein 1	chr11:96620198-96620257	GO:0050852|GO:0005737|GO:0019901|GO:0016020|GO:0005886|GO:0045944|GO:0019904|GO:0005634|GO:0045893|GO:0042169|GO:0032403|GO:0003823	NM_001033186	Mm.395840
A_51_P520936	Bcar3	Mus musculus breast cancer anti-estrogen resistance 3 (Bcar3), mRNA [NM_013867]	10.8909	up	-2.01972	-5.46477	chr3	122232748	+	FALSE	mm|3qG1	29815	NM_013867	breast cancer anti-estrogen resistance 3	chr3:122232748-122232807	GO:0005622|GO:0005085|GO:0007264	NM_013867	Mm.45815
A_55_P2073552	A930003A15Rik	Mus musculus RIKEN cDNA A930003A15 gene (A930003A15Rik), transcript variant 1, non-coding RNA [NR_015488]	13.9563	down	-4.18012	-0.377273	chr16	19876663	-	FALSE	mm|16qA3	68162	NR_015488	RIKEN cDNA A930003A15 gene	chr16:19876722-19876663	GO:0008150|GO:0003674|GO:0005575	NR_015488	Mm.35159
A_66_P134501	Olfm1	Mus musculus olfactomedin 1 (Olfm1), transcript variant 1, mRNA [NM_019498]	111.789	up	-1.09805	-7.90269	chr2	28086034	+	FALSE	mm|2qA3	56177	NM_019498	olfactomedin 1	chr2:28086034-28086093	GO:0005515|GO:0005783|GO:0007275|GO:0051259|GO:0005615	NM_019498	Mm.43278
A_66_P114333	Tlr12	Mus musculus toll-like receptor 12 (Tlr12), mRNA [NM_205823]	6.6856	up	-3.32342	-6.06447	chr4	128292690	-	FALSE	mm|4qD2.2	384059	NM_205823	toll-like receptor 12	chr4:128292749-128292690	GO:0007165|GO:0006954|GO:0016020|GO:0045087|GO:0031224|GO:0004872|GO:0016021|GO:0004888	NM_205823	Mm.331901
A_51_P284608	Cd74	Mus musculus CD74 antigen (invariant polypeptide of major histocompatibility complex, class II antigen-associated) (Cd74), transcript variant 1, mRNA [NM_001042605]	20.1458	up	2.9622	-1.37021	chr18	60972075	+	FALSE	mm|18qE1	16149	NM_001042605	CD74 antigen (invariant polypeptide of major histocompatibility complex, class II antigen-associated)	chr18:60972075-60972132	GO:0005515|GO:0016064|GO:0019221|GO:0050731|GO:0006886|GO:0005764|GO:0001516|GO:0002906|GO:0070374|GO:0005794|GO:0004896|GO:0009986|GO:0006952|GO:0043235|GO:0019955|GO:0045089|GO:0005887|GO:0090023|GO:0051085|GO:0002830|GO:0009897|GO:0050998|GO:0042289|GO:0005886|GO:0008283|GO:0005783|GO:0030890|GO:0048146|GO:0000187|GO:0019886|GO:0006955|GO:0001540|GO:0001961|GO:0019882|GO:0045581|GO:0002821|GO:…	NM_001042605	Mm.439737
A_55_P1975560	Ifi204	Mus musculus interferon activated gene 204 (Ifi204), mRNA [NM_008329]	17.5521	up	1.78654	-2.34703	chr1	175677647	-	FALSE	mm|1qH3	15951	NM_008329	interferon activated gene 204	chr1:175677706-175677647	GO:0003712|GO:0005515|GO:0006357|GO:0035458|GO:0005730|GO:0005634|GO:0045669|GO:0042771|GO:0005737|GO:0003690|GO:0016607|GO:0005654|GO:0030224|GO:0045892	NM_008329	Mm.261270
A_55_P2098697	Tnfaip2	Mus musculus tumor necrosis factor, alpha-induced protein 2 (Tnfaip2), mRNA [NM_009396]	13.3746	up	-1.28191	-5.02334	chr12	112692820	+	FALSE	mm|12qF1	21928	NM_009396	tumor necrosis factor, alpha-induced protein 2	chr12:112692820-112692879	GO:0007275|GO:0001525|GO:0030154	NM_009396	Mm.255332
A_55_P2031989	Rin2	Mus musculus Ras and Rab interactor 2 (Rin2), mRNA [NM_028724]	5.74545	up	-1.65547	-4.17789	chr2	145712858	+	FALSE	mm|2qG1	74030	NM_028724	Ras and Rab interactor 2	chr2:145712858-145712917	GO:0008150|GO:0007165|GO:0003674|GO:0005737|GO:0005575|GO:0006897|GO:0005096	NM_028724	Mm.228799
A_55_P2368710	C230037E05Rik	Mus musculus 0 day neonate cerebellum cDNA, RIKEN full-length enriched library, clone:C230037E05 product:unclassifiable, full insert sequence. [AK082316]	9.3857	up	-4.6701	-7.90057	chr6	5041673	+	FALSE	mm|6qA1	30910	AK082316	RIKEN cDNA C230037E05 gene	chr6:5041673-5041732	GO:0008150|GO:0003674|GO:0005575		Mm.440638
A_55_P1968355	Tle1	Mus musculus transducin-like enhancer of split 1, homolog of Drosophila E(spl) (Tle1), mRNA [NM_011599]	14.5793	up	-1.28885	-5.15469	chr4	71779250	-	FALSE	mm|4qC3	21885	NM_011599	transducin-like enhancer of split 1, homolog of Drosophila E(spl)	chr4:71779309-71779250	GO:0005515|GO:0005667|GO:0006355|GO:0006357|GO:0003714|GO:0005634|GO:0000122|GO:0006351|GO:0005737|GO:0003682|GO:0016055|GO:0045892|GO:0008134	NM_011599	Mm.278444
A_55_P2101340	Ramp3	Mus musculus receptor (calcitonin) activity modifying protein 3 (Ramp3), mRNA [NM_019511]	57.376	up	-1.93497	-7.77735	chr11	6577416	+	FALSE	mm|11qA1	56089	NM_019511	receptor (calcitonin) activity modifying protein 3	chr11:6577416-6577475	GO:0007165|GO:0008277|GO:0016020|GO:0007186|GO:0005886|GO:0008565|GO:0006810|GO:0004872|GO:0016021|GO:0015026|GO:0006886	NM_019511	Mm.39884
A_52_P345539	Uty	Mus musculus ubiquitously transcribed tetratricopeptide repeat gene, Y chromosome (Uty), mRNA [NM_009484]	5.22287	up	-5.30138	-7.68622	chrY	433804	-	FALSE	mm|YqA1	22290	NM_009484	ubiquitously transcribed tetratricopeptide repeat gene, Y chromosome	chrY:433863-433804		NM_009484	Mm.20477
A_55_P2004007		predicted gene 4955 [Source:MGI Symbol;Acc:MGI:3646410] [ENSMUST00000037976]	15.8958	up	-1.96035	-5.95093	chr1	175398817	-	FALSE	mm|1qH3		XM_136331		chr1:175398876-175398817		XM_136331	Mm.32625
A_51_P163173	Rbm12b	Mus musculus RNA binding motif protein 12B (Rbm12b), mRNA [NM_028226]	7.45144	up	-4.58562	-7.48314	chr4	12073578	+	FALSE	mm|4qA1	72397	NM_028226	RNA binding motif protein 12B	chr4:12073578-12073637	GO:0008150|GO:0003674|GO:0000166|GO:0003723|GO:0005575|GO:0003676	NM_028226	Mm.430709
A_52_P311853	Ddit4l	Mus musculus DNA-damage-inducible transcript 4-like (Ddit4l), mRNA [NM_030143]	5.90704	up	-3.89579	-6.45822	chr3	137290927	+	FALSE	mm|3qG3	73284	NM_030143	DNA-damage-inducible transcript 4-like	chr3:137290927-137290986	GO:0008150|GO:0003674|GO:0005737|GO:0009968|GO:0005575	NM_030143	Mm.250841
A_55_P1985360	Man1c1	Mus musculus mannosidase, alpha, class 1C, member 1 (Man1c1), mRNA [NM_207237]	10.5425	up	-1.94576	-5.34391	chr4	134117738	-	FALSE	mm|4qD3	230815	NM_207237	mannosidase, alpha, class 1C, member 1	chr4:134117797-134117738	GO:0005794|GO:0000139|GO:0005509|GO:0004571|GO:0030166|GO:0006013	NM_207237	Mm.18905
A_55_P2007022	Cd97	Mus musculus CD97 antigen (Cd97), transcript variant 1, mRNA [NM_011925]	20.5794	up	-1.03815	-5.40128	chr8	86247320	-	FALSE	mm|8qC2	26364	NM_011925	CD97 antigen	chr8:86247379-86247320	GO:0005886|GO:0004930|GO:0005509|GO:0007165|GO:0007186|GO:0016020|GO:0007218|GO:0004872|GO:0004871|GO:0016021|GO:0007155|GO:0007166|GO:0004888	NM_011925	Mm.334648
A_52_P613643	Zfp3	Mus musculus zinc finger protein 3 (Zfp3), mRNA [NM_177565]	8.77907	up	-4.08575	-7.21982	chr11	70585964	+	FALSE	mm|11qB3	193043	NM_177565	zinc finger protein 3	chr11:70585964-70586023	GO:0005622|GO:0006355|GO:0008270|GO:0005634|GO:0003676|GO:0003677|GO:0046872|GO:0006351	NM_177565	Mm.40966
A_55_P1997421	Gm5416	Mus musculus predicted gene 5416 (Gm5416), mRNA [NM_001082542]	13.1595	up	-4.15032	-7.86835	chr16	36217755	+	FALSE	mm|16qB3	408196	NM_001082542	predicted gene 5416	chr16:36217755-36217814	GO:0008150|GO:0003674|GO:0005575	NM_001082542	Mm.432544
A_55_P2142499		predicted gene, 16858 [Source:MGI Symbol;Acc:MGI:4439782] [ENSMUST00000103502]	5.32956	down	0.37978	2.7938	chr12	115895649	-	FALSE	mm|12qF2		FM179586		chr12:115895708-115895649			Mm.313411
A_51_P371174	Bag3	Mus musculus BCL2-associated athanogene 3 (Bag3), mRNA [NM_013863]	7.76687	up	-1.90664	-4.86398	chr7	135690281	+	FALSE	mm|7qF3	29810	NM_013863	BCL2-associated athanogene 3	chr7:135690281-135690340	GO:0005515|GO:0043066|GO:0006915|GO:0042981|GO:0006916|GO:0019717|GO:0005829	NM_013863	Mm.84073
A_51_P326191	Serpina3g	Mus musculus serine (or cysteine) peptidase inhibitor, clade A, member 3G (Serpina3g), mRNA [NM_009251]	102.097	up	0.800178	-5.87362	chr12	105480045	+	FALSE	mm|12qE	20715	NM_009251	serine (or cysteine) peptidase inhibitor, clade A, member 3G	chr12:105480045-105480104	GO:0030162|GO:0010951|GO:0005737|GO:0004869|GO:0004867|GO:0010466|GO:0043434|GO:0006915|GO:0005634|GO:0005576|GO:0034097|GO:0030414	NM_009251	Mm.312628
A_51_P474498	Tac4	Mus musculus tachykinin 4 (Tac4), mRNA [NM_053093]	5.78388	up	-3.78076	-6.31279	chr11	95130516	+	FALSE	mm|11qD	93670	NM_053093	tachykinin 4	chr11:95130516-95130575	GO:0043303|GO:0046878|GO:0008217|GO:0005102|GO:0007217|GO:0005576	NM_053093	Mm.40085
A_55_P1972582		predicted gene 4955 [Source:MGI Symbol;Acc:MGI:3646410] [ENSMUST00000037976]	9.80318	up	-3.21939	-6.51264	chr1	175398723	-	FALSE	mm|1qH3		XM_136331		chr1:175398782-175398723		XM_136331	Mm.32625
A_51_P472867	Oas3	Mus musculus 2'-5' oligoadenylate synthetase 3 (Oas3), mRNA [NM_145226]	6.42929	up	-2.47717	-5.16183	chr5	121203598	-	FALSE	mm|5qF	246727	NM_145226	2'-5' oligoadenylate synthetase 3	chr5:121203657-121203598	GO:0008150|GO:0003674|GO:0005575	NM_145226	Mm.204887
A_51_P414879		immunoglobulin kappa variable 1-133 [Source:MGI Symbol;Acc:MGI:3648380] [ENSMUST00000103304]	20.5823	down	-7.5849	-3.22157	chr6	67675577	+	FALSE	mm|6qC1		S60874		chr6:67675577-67675636			Mm.333124
A_55_P2174711			45.5378	up	-0.0631432	-5.57214	chr7	146765263	-	FALSE	mm|7qF4				chr7:146765322-146765263
A_55_P2041868	Ptafr	Mus musculus platelet-activating factor receptor (Ptafr), mRNA [NM_001081211]	5.13567	up	-1.68873	-4.04928	chr4	132136722	+	FALSE	mm|4qD2.3	19204	NM_001081211	platelet-activating factor receptor	chr4:132136722-132136781	GO:0005886|GO:0004930|GO:0048015|GO:0001875|GO:0005634|GO:0001816|GO:0043231|GO:0001530|GO:0007165|GO:0002221|GO:0032959|GO:0004992|GO:0005543|GO:0006954|GO:0016020|GO:0007186|GO:0006935|GO:0032496|GO:0004872|GO:0016021|GO:0004871|GO:0031663	NM_001081211	Mm.89389
A_55_P2103887	Clec4a4	Mus musculus C-type lectin domain family 4, member a4 (Clec4a4), mRNA [NM_001005860]	18.8403	up	-3.53175	-7.7675	chr6	122974064	+	FALSE	mm|6qF2	474145	NM_001005860	C-type lectin domain family 4, member a4	chr6:122974064-122974123	GO:0008150|GO:0003674|GO:0005529|GO:0004872|GO:0005575	NM_001005860	Mm.263483
A_55_P2021555	Tbrg1	Mus musculus transforming growth factor beta regulated gene 1 (Tbrg1), mRNA [NM_025289]	21.7773	up	3.26523	-1.17953	chr9	37456773	-	FALSE	mm|9qA4	21376	NM_025289	transforming growth factor beta regulated gene 1	chr9:37456832-37456773	GO:0006260|GO:0003674|GO:0007049|GO:0008285|GO:0050821|GO:0007050|GO:0005634|GO:0003677|GO:0032066	NM_025289	Mm.28689
A_51_P511060	Csgalnact2	Mus musculus chondroitin sulfate N-acetylgalactosaminyltransferase 2 (Csgalnact2), mRNA [NM_030165]	7.43576	up	-0.768501	-3.66298	chr6	118057664	-	FALSE	mm|6qF1	78752	NM_030165	chondroitin sulfate N-acetylgalactosaminyltransferase 2	chr6:118057723-118057664	GO:0050650|GO:0005794|GO:0050651|GO:0016758|GO:0005575|GO:0046872|GO:0008376|GO:0030166|GO:0016020|GO:0032580|GO:0016021|GO:0016740|GO:0047237	NM_030165	Mm.300317
A_51_P434776	Jmjd8	Mus musculus jumonji domain containing 8 (Jmjd8), mRNA [NM_028101]	6.72987	up	-1.34986	-4.10044	chr17	25968309	+	FALSE	mm|17qA3.3	72106	NM_028101	jumonji domain containing 8	chr17:25968309-25968368	GO:0008150|GO:0003674|GO:0005575	NM_028101	Mm.485799
A_55_P2065288	Scn3a	sodium channel, voltage-gated, type III, alpha [Source:MGI Symbol;Acc:MGI:98249] [ENSMUST00000045256]	5.31436	up	-4.78442	-7.19431	chr2	65332960	-	FALSE	mm|2qC1.3	20269	L42337	sodium channel, voltage-gated, type III, alpha	chr2:65333019-65332960	GO:0030424|GO:0005516|GO:0046684|GO:0005244|GO:0005272|GO:0005248|GO:0005624|GO:0031402|GO:0019233|GO:0019228|GO:0005737|GO:0043025|GO:0006810|GO:0035725|GO:0034765|GO:0001518|GO:0016021|GO:0006814|GO:0005216|GO:0071236|GO:0006811
A_65_P00930	Gria2	Mus musculus glutamate receptor, ionotropic, AMPA2 (alpha 2) (Gria2), transcript variant 3, mRNA [NM_001039195]	7.96129	down	-5.26881	-2.27581	chr3	80495725	-	FALSE	mm|3qE3	14800	NM_001039195	glutamate receptor, ionotropic, AMPA2 (alpha 2)	chr3:80495784-80495725	GO:0005515|GO:0030054|GO:0005886|GO:0005783|GO:0005234|GO:0045202|GO:0007268|GO:0032839|GO:0030425|GO:0045184|GO:0032279|GO:0030426|GO:0031623|GO:0034220|GO:0043197|GO:0043198|GO:0045211|GO:0043195|GO:0004971|GO:0032281|GO:0004970|GO:0043025|GO:0006810|GO:0043204|GO:0004872|GO:0030672|GO:0006811|GO:0051966|GO:0019901|GO:0005624|GO:0014069|GO:0030165|GO:0030666|GO:0043234|GO:0042734|GO:0007165|GO:…	NM_001039195	Mm.220224
A_55_P1962509	a	Mus musculus nonagouti (a), mRNA [NM_015770]	6.50578	up	-5.15473	-7.85646	chr2	154876688	+	FALSE	mm|2qH1	50518	NM_015770	nonagouti	chr2:154876688-154876747	GO:0005515|GO:0008343|GO:0032438|GO:0005576|GO:0006091|GO:0032402|GO:0040030|GO:0009755|GO:0042438|GO:0071514|GO:0031781|GO:0031782|GO:0043473|GO:0031779	NM_015770	Mm.315593
A_55_P1984178	Pde4dip	Mus musculus phosphodiesterase 4D interacting protein (myomegalin) (Pde4dip), transcript variant 1, mRNA [NM_001039376]	5.7002	up	-5.14046	-7.65147	chr3	97493756	-	FALSE	mm|3qF2.2	83679	NM_001039376	phosphodiesterase 4D interacting protein (myomegalin)	chr3:97493815-97493756	GO:0005515|GO:0005813|GO:0005737|GO:0005794|GO:0005634|GO:0030016|GO:0019899|GO:0005856|GO:0043623	NM_001039376	Mm.129840
A_55_P2114118	Cadm1	Mus musculus cell adhesion molecule 1 (Cadm1), transcript variant 1, mRNA [NM_207675]	13.2436	up	-2.62494	-6.35216	chr9	47658414	+	FALSE	mm|9qA5.3	54725	NM_207675	cell adhesion molecule 1	chr9:47658414-47658473	GO:0005515|GO:0030424|GO:0008037|GO:0005886|GO:0045202|GO:0050715|GO:0007283|GO:0042803|GO:0030154|GO:0030425|GO:0016323|GO:0051606|GO:0016338|GO:0005911|GO:0042271|GO:0007155|GO:0019717|GO:0050839|GO:0007156|GO:0007157|GO:0005102|GO:0006915|GO:0007275|GO:0008022|GO:0030165|GO:0007416|GO:0009826|GO:0008021|GO:0001889|GO:0016020|GO:0045954|GO:0016021	NM_207675	Mm.234832
A_55_P2129354	Pilra	Mus musculus paired immunoglobin-like type 2 receptor alpha (Pilra), mRNA [NM_153510]	19.4316	up	-0.362558	-4.64289	chr5	138264617	-	FALSE	mm|5qG2	231805	NM_153510	paired immunoglobin-like type 2 receptor alpha	chr5:138264676-138264617	GO:0005515|GO:0007165|GO:0016020|GO:0004872|GO:0016021	NM_153510	Mm.379385
A_51_P125205	Aqp1	Mus musculus aquaporin 1 (Aqp1), mRNA [NM_007472]	41.9752	up	-2.25687	-7.64833	chr6	55298480	+	FALSE	mm|6qB3	11826	NM_007472	aquaporin 1	chr6:55298480-55298539	GO:0015079|GO:0005215|GO:0020003|GO:0070301|GO:0071300|GO:0032127|GO:0048593|GO:0031526|GO:0035377|GO:0006884|GO:0030104|GO:0034644|GO:0009925|GO:0015793|GO:0006810|GO:0006833|GO:0033363|GO:0070062|GO:0005223|GO:0071474|GO:0031965|GO:0030335|GO:0030950|GO:0071288|GO:0015696|GO:0071472|GO:0005267|GO:0033554|GO:0035378|GO:0035379|GO:0046878|GO:0051458|GO:0005887|GO:0006182|GO:0042060|GO:0071241|GO:…	NM_007472	Mm.18625
A_55_P1983668	Gm6377	Mus musculus predicted gene 6377 (Gm6377), mRNA [NM_001037917]	21.6189	up	-3.35451	-7.78873	chrX	106395707	+	FALSE	mm|XqD	622976	NM_001037917	predicted gene 6377	chrX:106395707-106395766	GO:0008150|GO:0003674|GO:0005575	NM_001037917	Mm.482747
A_51_P116407	X99384	Mus musculus cDNA sequence X99384 (X99384), mRNA [NM_013753]	5.47194	up	-4.17825	-6.6303	chr10	60782760	-	FALSE	mm|10qB4	27355	NM_013753	cDNA sequence X99384	chr10:60782819-60782760	GO:0008150|GO:0003674|GO:0005575	NM_013753	Mm.269699
A_55_P2036813	Hist3h2ba	Mus musculus histone cluster 3, H2ba (Hist3h2ba), mRNA [NM_030082]	9.50904	up	-0.510777	-3.76008	chr11	58762964	+	FALSE	mm|11qB1.3	78303	NM_030082	histone cluster 3, H2ba	chr11:58762964-58763023	GO:0008150|GO:0003674|GO:0005694|GO:0006334|GO:0005634|GO:0005575|GO:0000786|GO:0003677	NM_030082	Mm.28022
A_55_P2078670	Cbs	Mus musculus cystathionine beta-synthase (Cbs), transcript variant 1, mRNA [NM_144855]	8.93536	up	-1.44064	-4.60017	chr17	31749593	-	FALSE	mm|17qB1	12411	NM_144855	cystathionine beta-synthase	chr17:31749652-31749593	GO:0019343|GO:0019344|GO:0070814|GO:0019346|GO:0006535|GO:0006801|GO:0005634|GO:0003824|GO:0050667|GO:0046872|GO:0042803|GO:0043231|GO:0042802|GO:0005829|GO:0005737|GO:0050880|GO:0060351|GO:0043506|GO:0004124|GO:0004122|GO:0031625|GO:0060135|GO:0005730|GO:0008652|GO:0021587|GO:0005625|GO:0016829|GO:0051593|GO:0001958|GO:0043418|GO:0001974|GO:0030170|GO:0008152|GO:0006563|GO:0019899|GO:0006565|GO:…	NM_144855	Mm.206417
A_55_P2181444			5.48332	down	4.7779	7.23295	chr7	112097789	-	FALSE	mm|7qE3				chr7:112097847-112097789
A_55_P2033725	Ascl2	Mus musculus achaete-scute complex homolog 2 (Drosophila) (Ascl2), mRNA [NM_008554]	5.74254	up	-5.23711	-7.7588	chr7	150152734	-	FALSE	mm|7qF5	17173	NM_008554	achaete-scute complex homolog 2 (Drosophila)	chr7:150152793-150152734	GO:0006355|GO:0003700|GO:0006357|GO:0060708|GO:0070888|GO:0005634|GO:0007275|GO:0000122|GO:0001701|GO:0003677|GO:0006351|GO:0030154|GO:0007399|GO:0043565|GO:0005737|GO:0010626|GO:0035019	NM_008554	Mm.196417
A_52_P213483		predicted gene, 16746 [Source:MGI Symbol;Acc:MGI:4439670] [ENSMUST00000170551]	7.5376	up	0.525012	-2.38909	chr12	117100209	-	FALSE	mm|12qF2		AF045501		chr12:117100268-117100209			Mm.313480
A_55_P1991773	Icos	Mus musculus inducible T-cell co-stimulator (Icos), mRNA [NM_017480]	15.3291	up	-2.88727	-6.82547	chr1	61057105	+	FALSE	mm|1qC2	54167	NM_017480	inducible T-cell co-stimulator	chr1:61057105-61057164	GO:0005515|GO:0016020|GO:0005886|GO:0005887|GO:0016021|GO:0009897	NM_017480	Mm.42044
A_55_P2065294	Scn3a	Mus musculus 2 days neonate sympathetic ganglion cDNA, RIKEN full-length enriched library, clone:7120459A07 product:Voltage-gated sodium channel (SCN3A) (Fragment) homolog [Homo sapiens], full insert sequence. [AK148881]	7.45768	up	-1.01372	-3.91244	chr2	65346334	-	FALSE	mm|2qC1.3	20269	AK148881	sodium channel, voltage-gated, type III, alpha	chr2:65346393-65346334	GO:0030424|GO:0005516|GO:0046684|GO:0005244|GO:0005272|GO:0005248|GO:0005624|GO:0031402|GO:0019233|GO:0019228|GO:0005737|GO:0043025|GO:0006810|GO:0035725|GO:0034765|GO:0001518|GO:0016021|GO:0006814|GO:0005216|GO:0071236|GO:0006811
A_52_P386627	Irak3	Mus musculus interleukin-1 receptor-associated kinase 3 (Irak3), mRNA [NM_028679]	5.98703	up	-4.13221	-6.71406	chr10	119578999	-	FALSE	mm|10qD2	73914	NM_028679	interleukin-1 receptor-associated kinase 3	chr10:119579058-119578999	GO:0034122|GO:0032715|GO:0019221|GO:0005634|GO:0042803|GO:0042802|GO:0005737|GO:0051092|GO:0046777|GO:0043244|GO:0001960|GO:0000166|GO:0016301|GO:0043407|GO:0032496|GO:0004872|GO:0070555|GO:0070498|GO:0045824|GO:0016772|GO:0000287|GO:0046982|GO:0042177|GO:0032720|GO:0006915|GO:0042981|GO:0032088|GO:0009615|GO:0043242|GO:0005524|GO:0007165|GO:0010933|GO:0016310|GO:0010936|GO:0004672|GO:0004674|GO:…	NM_028679	Mm.146194
A_52_P987201	Pdzrn4	Mus musculus PDZ domain containing RING finger 4 (Pdzrn4), transcript variant 1, mRNA [NM_001164593]	6.30596	down	-7.48249	-4.82578	chr15	92602131	+	FALSE	mm|15qE3	239618	NM_001164593	PDZ domain containing RING finger 4	chr15:92602131-92602190	GO:0008150|GO:0003674|GO:0005575|GO:0046872	NM_001164593	Mm.309826
A_51_P343833	Traf1	Mus musculus TNF receptor-associated factor 1 (Traf1), mRNA [NM_009421]	9.75343	up	-0.719845	-4.00576	chr2	34798882	-	FALSE	mm|2qB	22029	NM_009421	TNF receptor-associated factor 1	chr2:34798941-34798882	GO:0005515|GO:0007165|GO:0051092|GO:0042981|GO:0004872	NM_009421	Mm.239514
A_55_P2171177	Ttll13	Mus musculus tubulin tyrosine ligase-like family, member 13 (Ttll13), mRNA [NM_177765]	7.51214	down	-7.11302	-4.20379	chr7	87404519	+	FALSE	mm|7qD3	269954	NM_177765	tubulin tyrosine ligase-like family, member 13	chr7:87404519-87404578	GO:0008150|GO:0003674|GO:0004835|GO:0016874|GO:0005575|GO:0005524|GO:0006464	NM_177765	Mm.276780
A_51_P349495	Mboat1	Mus musculus membrane bound O-acyltransferase domain containing 1 (Mboat1), mRNA [NM_153546]	77.8144	up	-1.54063	-7.82259	chr13	30338253	+	FALSE	mm|13qA3.2	218121	NM_153546	membrane bound O-acyltransferase domain containing 1	chr13:30338253-30338312	GO:0008150|GO:0003674|GO:0016020|GO:0005783|GO:0016021|GO:0008654|GO:0005575|GO:0016740|GO:0008415	NM_153546	Mm.89682
A_51_P133792	Prickle3	Mus musculus prickle homolog 3 (Drosophila) (Prickle3), mRNA [NM_175097]	10.9429	up	-2.82952	-6.28144	chrX	7244943	+	FALSE	mm|XqA1.1	54630	NM_175097	prickle homolog 3 (Drosophila)	chrX:7244943-7245002	GO:0008270|GO:0046872	NM_175097	Mm.232232
A_51_P464308	Gnb4	Mus musculus guanine nucleotide binding protein (G protein), beta 4 (Gnb4), mRNA [NM_013531]	23.4419	up	-1.81362	-6.36464	chr3	32488819	-	FALSE	mm|3qA3	14696	NM_013531	guanine nucleotide binding protein (G protein), beta 4	chr3:32488964-32488819	GO:0006184|GO:0007165|GO:0007186|GO:0071377|GO:0005834|GO:0003924|GO:0004871	NM_013531	Mm.139192
A_55_P2180909	2410075B13Rik	Mus musculus RIKEN cDNA 2410075B13 gene (2410075B13Rik), transcript variant 2, mRNA [NM_001163518]	13.6707	up	-2.15139	-5.92441	chr15	75811197	-	FALSE	mm|15qD3	223648	NM_001163518	RIKEN cDNA 2410075B13 gene	chr15:75811256-75811197	GO:0008150|GO:0003674|GO:0005575	NM_001163518	Mm.17610
A_55_P2150953	Gm4827	PREDICTED: Mus musculus predicted gene 4827 (Gm4827), miscRNA [XR_035106]	6.20205	down	-4.44642	-1.81367	chr16	50019771	-	FALSE	mm|16qB5	224180	XR_035106	predicted gene 4827	chr16:50019828-50019771	GO:0008150|GO:0003674|GO:0005575	XR_035106	Mm.146439
A_52_P638459	Ccl5	Mus musculus chemokine (C-C motif) ligand 5 (Ccl5), mRNA [NM_013653]	8.14266	up	1.07692	-1.94858	chr11	83339296	-	FALSE	mm|11qC	20304	NM_013653	chemokine (C-C motif) ligand 5	chr11:83339355-83339296	GO:0031269|GO:0070233|GO:0070234|GO:0060754|GO:0043621|GO:0005615|GO:0042803|GO:0043623|GO:0031726|GO:0050904|GO:0031622|GO:0030298|GO:0006935|GO:0070100|GO:0060548|GO:0043526|GO:0045071|GO:0031584|GO:0008009|GO:0042531|GO:0014068|GO:0005125|GO:0042056|GO:0045785|GO:0010759|GO:0048245|GO:0048247|GO:0090026|GO:0042119|GO:0031730|GO:0061098|GO:0007267|GO:2000272|GO:0014911|GO:0005737|GO:0006955|GO:…	NM_013653	Mm.284248
A_55_P2113703	Spib	Mus musculus Spi-B transcription factor (Spi-1/PU.1 related) (Spib), mRNA [NM_019866]	8.70997	up	-7.10487e-05	-3.12274	chr7	51781392	-	FALSE	mm|7qB4	272382	NM_019866	Spi-B transcription factor (Spi-1/PU.1 related)	chr7:51781451-51781392	GO:0043565|GO:0005667|GO:0006355|GO:0003700|GO:0015630|GO:0030225|GO:0005634|GO:0003677|GO:0006351	NM_019866	Mm.8012
A_55_P2051313	Gstk1	Mus musculus glutathione S-transferase kappa 1 (Gstk1), nuclear gene encoding mitochondrial protein, mRNA [NM_029555]	13.9245	up	-2.50746	-6.30701	chr6	42200381	+	FALSE	mm|6qB2.1	76263	NM_029555	glutathione S-transferase kappa 1	chr6:42200381-42200440	GO:0005743|GO:0015035|GO:0006749|GO:0004364|GO:0042802|GO:0043231|GO:0004602|GO:0005622|GO:0005739|GO:0005759|GO:0030288|GO:0008152|GO:0016740|GO:0055114	NM_029555	Mm.267014
A_51_P416546	Ctsg	Mus musculus cathepsin G (Ctsg), mRNA [NM_007800]	11.5663	up	-1.43576	-4.96762	chr14	56718795	-	FALSE	mm|14qC3	13035	NM_007800	cathepsin G	chr14:56718854-56718795	GO:0005882|GO:0004252|GO:0005886|GO:0050830|GO:0050832|GO:0005576|GO:0003824|GO:0005615|GO:0016020|GO:0016787|GO:0050778|GO:0032496|GO:0006508|GO:0008236|GO:0008233|GO:0044130|GO:0030141|GO:0008201|GO:0070946	NM_007800	Mm.4858
A_55_P2054362		DJ534K4 S164 {Homo sapiens} (exp=-1; wgp=0; cg=0), partial (8%) [TC1715571]	5.4183	up	1.2387	-1.19914	chr9	119957806	-	FALSE	mm|9qF4				chr9:119957865-119957806
A_51_P185660	Ccl9	Mus musculus chemokine (C-C motif) ligand 9 (Ccl9), mRNA [NM_011338]	9.78776	up	2.24492	-1.04606	chr11	83388223	-	FALSE	mm|11qC	20308	NM_011338	chemokine (C-C motif) ligand 9	chr11:83388282-83388223	GO:0008009|GO:0006955|GO:0006935|GO:0005576|GO:0005615|GO:0005125	NM_011338	Mm.416125
A_55_P2386236	Ceacam2	Mus musculus carcinoembryonic antigen-related cell adhesion molecule 2 (Ceacam2), transcript variant 1, mRNA [NM_001113368]	7.35404	up	-1.58871	-4.46725	chr7	26302671	-	FALSE	mm|7qA3	26367	NM_001113368	carcinoembryonic antigen-related cell adhesion molecule 2	chr7:26302730-26302671	GO:0008150|GO:0003674|GO:0016020|GO:0009986|GO:0044419|GO:0004872|GO:0016021	NM_001113368	Mm.439731
A_55_P1997821	Nat8l	Mus musculus N-acetyltransferase 8-like (Nat8l), mRNA [NM_001001985]	7.23116	up	-1.03555	-3.88978	chr5	34348343	+	FALSE	mm|5qB2	269642	NM_001001985	N-acetyltransferase 8-like	chr5:34348343-34348402	GO:0005792|GO:0008080|GO:0031966|GO:0005783|GO:0005739|GO:0005737|GO:0017188|GO:0016020|GO:0051586|GO:0008152|GO:0005789|GO:0016021|GO:0016740|GO:0008415	NM_001001985	Mm.274610
A_55_P2162688		T-cell receptor gamma, constant region [Source:MGI Symbol;Acc:MGI:98624] [ENSMUST00000103566]	17.9271	down	-3.37697	0.787106	chr13	19444153	+	FALSE	mm|13qA2		U07554		chr13:19444153-19444212			Mm.210785
A_51_P115666	Fam83h	Mus musculus family with sequence similarity 83, member H (Fam83h), transcript variant 2, mRNA [NM_134087]	5.86752	down	-2.5859	-0.0331464	chr15	75831557	-	FALSE	mm|15qD3	105732	NM_134087	family with sequence similarity 83, member H	chr15:75831616-75831557	GO:0008150|GO:0003674|GO:0005575|GO:0031214	NM_134087	Mm.267178
A_55_P1989337	Gm14124	Mus musculus predicted gene 14124 (Gm14124), mRNA [NM_001142410]	7.17824	down	-6.28183	-3.4382	chr2	150095897	+	FALSE	mm|2qG3	100216455	NM_001142410	predicted gene 14124	chr2:150095897-150095956	GO:0008150|GO:0003674|GO:0005575|GO:0046872	NM_001142410	Mm.484816
A_51_P147274	Clec4a3	Mus musculus C-type lectin domain family 4, member a3 (Clec4a3), transcript variant 1, mRNA [NM_153197]	47.6541	up	-2.20782	-7.78235	chr6	122919637	+	FALSE	mm|6qF2	73149	NM_153197	C-type lectin domain family 4, member a3	chr6:122919637-122919696	GO:0008150|GO:0003674|GO:0005529|GO:0004872|GO:0005575	NM_153197	Mm.25684
A_66_P137439		START domain containing 9 [Source:MGI Symbol;Acc:MGI:3045258] [ENSMUST00000028734]	7.15284	up	-3.96103	-6.79954	chr2	120492109	+	FALSE	mm|2qE5		AB001425		chr2:120492109-120492256			Mm.483556
A_51_P423709	Fam84a	Mus musculus family with sequence similarity 84, member A (Fam84a), mRNA [NM_029007]	8.39221	down	-7.07923	-4.01018	chr12	14154871	-	FALSE	mm|12qA1.1	105005	NM_029007	family with sequence similarity 84, member A	chr12:14154930-14154871		NM_029007	Mm.227253
A_66_P123824	Sorl1	sortilin-related receptor, LDLR class A repeats-containing [Source:MGI Symbol;Acc:MGI:1202296] [ENSMUST00000060989]	27.0151	up	-2.88833	-7.64402	chr9	41772997	-	FALSE	mm|9qA5.1	20660	AK162665	sortilin-related receptor, LDLR class A repeats-containing	chr9:41773056-41772997	GO:0005515|GO:0048471|GO:0016477|GO:0005771|GO:0043025|GO:0030169		Mm.121920
A_55_P2178578	Tmprss4	Mus musculus transmembrane protease, serine 4 (Tmprss4), mRNA [NM_145403]	5.88759	up	-5.12081	-7.67848	chr9	44980979	-	FALSE	mm|9qA5.2	214523	NM_145403	transmembrane protease, serine 4	chr9:44981038-44980979	GO:0016787|GO:0016020|GO:0004252|GO:0006508|GO:0008236|GO:0008233|GO:0016021|GO:0003824|GO:0005044	NM_145403	Mm.436756
A_55_P1954835	Ramp3	Mus musculus receptor activity modifying protein 3 mRNA, complete cds. [AF209907]	32.4545	up	-2.45773	-7.47807	chr11	6577424	+	FALSE	mm|11qA1	56089	AF209907	receptor (calcitonin) activity modifying protein 3	chr11:6577424-6577483	GO:0007165|GO:0008277|GO:0016020|GO:0007186|GO:0005886|GO:0008565|GO:0006810|GO:0004872|GO:0016021|GO:0015026|GO:0006886		Mm.39884
A_51_P393654	Fam171b	Mus musculus family with sequence similarity 171, member B (Fam171b), mRNA [NM_175514]	6.06995	up	-5.04174	-7.64342	chr2	83721451	+	FALSE	mm|2qD	241520	NM_175514	family with sequence similarity 171, member B	chr2:83721451-83721510	GO:0008150|GO:0003674|GO:0016020|GO:0016021|GO:0005575	NM_175514	Mm.330351
A_51_P342652	Cd79b	Mus musculus CD79B antigen (Cd79b), mRNA [NM_008339]	35.6164	up	-0.528645	-5.68311	chr11	106172780	-	FALSE	mm|11qE1	15985	NM_008339	CD79B antigen	chr11:106172839-106172780	GO:0050853|GO:0005515|GO:0019815|GO:0005737|GO:0005794|GO:0016020|GO:0005886|GO:0005634|GO:0016021|GO:0009897|GO:0007166|GO:0004888	NM_008339	Mm.2987
A_55_P2092492	Il18r1	Mus musculus interleukin 18 receptor 1 (Il18r1), transcript variant 2, mRNA [NM_001161842]	6.9017	down	-4.17427	-1.38731	chr1	40537851	+	FALSE	mm|1qB	16182	NM_001161842	interleukin 18 receptor 1	chr1:40537851-40537910	GO:0007165|GO:0016020|GO:0045087|GO:0031224|GO:0004872|GO:0016021|GO:0004888	NM_001161842	Mm.253664
A_51_P202633	Ebi3	Mus musculus Epstein-Barr virus induced gene 3 (Ebi3), mRNA [NM_015766]	178.111	up	1.48069	-5.99595	chr17	56096309	+	FALSE	mm|17qD	50498	NM_015766	Epstein-Barr virus induced gene 3	chr17:56096309-56096368	GO:0005515|GO:0004896|GO:0016020|GO:0019221|GO:0045523|GO:0005576|GO:0005615|GO:0005125	NM_015766	Mm.256798
A_55_P1962747	H2-Ab1	Mus musculus histocompatibility 2, class II antigen A, beta 1 (H2-Ab1), mRNA [NM_207105]	224.972	up	3.19198	-4.62162	chr17	34406296	+	FALSE	mm|17qB1	14961	NM_207105	histocompatibility 2, class II antigen A, beta 1	chr17:34406296-34406355	GO:0005515|GO:0046635|GO:0005886|GO:0048002|GO:0005622|GO:0019886|GO:0006955|GO:0019882|GO:0002827|GO:0042605|GO:0070491|GO:0002344|GO:0031625|GO:0005794|GO:0005771|GO:0002504|GO:0042613|GO:0002579|GO:0016020|GO:0071346|GO:0015643|GO:0016021|GO:0009897|GO:0005769|GO:0008134	NM_207105	Mm.254067
A_55_P1980796	Il2ra	Mus musculus interleukin 2 receptor, alpha chain (Il2ra), mRNA [NM_008367]	8.59583	up	-3.83462	-6.93826	chr2	11614744	+	FALSE	mm|2qA1	16184	NM_008367	interleukin 2 receptor, alpha chain	chr2:11614744-11614803	GO:0002437|GO:0050687|GO:0004911|GO:0043065|GO:0005886|GO:0009986|GO:0019221|GO:0006924|GO:0019976|GO:0050672|GO:0042130|GO:0042104|GO:0050777|GO:0016020|GO:0050728|GO:0008144|GO:0042102|GO:0004872|GO:0046013|GO:0016021|GO:0043029|GO:0045582|GO:0009897	NM_008367	Mm.915
A_55_P2186180	1810063B07Rik	Mus musculus RIKEN cDNA 1810063B07 gene (1810063B07Rik), mRNA [NM_026209]	5.19561	up	-5.37321	-7.75051	chr14	20894894	-	FALSE	mm|14qA3	67509	NM_026209	RIKEN cDNA 1810063B07 gene	chr14:20894953-20894894	GO:0008150|GO:0003674|GO:0016020|GO:0016021|GO:0005575	NM_026209	Mm.292423
A_55_P1971439	Serpinb9c	Mus musculus serine (or cysteine) peptidase inhibitor, clade B, member 9c (Serpinb9c), transcript variant 1, mRNA [NM_001164524]	5.8939	up	-1.14778	-3.70701	chr13	33241202	-	FALSE	mm|13qA3.3	20707	NM_001164524	serine (or cysteine) peptidase inhibitor, clade B, member 9c	chr13:33241261-33241202	GO:0030162|GO:0010951|GO:0005737|GO:0004867	NM_001164524	Mm.219429
A_52_P363216	Gcnt2	Mus musculus glucosaminyl (N-acetyl) transferase 2, I-branching enzyme (Gcnt2), transcript variant 3, mRNA [NM_133219]	33.5436	up	-2.35324	-7.4212	chr13	41055331	+	FALSE	mm|13qA3.3	14538	NM_133219	glucosaminyl (N-acetyl) transferase 2, I-branching enzyme	chr13:41055331-41055390	GO:0008375|GO:0005794|GO:0016020|GO:0016757|GO:0008152|GO:0016021|GO:0008109|GO:0016740	NM_133219	Mm.314757
A_51_P449048	Cndp2	Mus musculus CNDP dipeptidase 2 (metallopeptidase M20 family) (Cndp2), mRNA [NM_023149]	5.75379	down	-1.38266	1.14185	chr18	84837403	-	FALSE	mm|18qE4	66054	NM_023149	CNDP dipeptidase 2 (metallopeptidase M20 family)	chr18:84837462-84837403	GO:0005737|GO:0016787|GO:0034701|GO:0008152|GO:0006508|GO:0004180|GO:0008233|GO:0016805|GO:0046872|GO:0008237|GO:0005829	NM_023149	Mm.29646
A_51_P402994	Ddx3y	Mus musculus DEAD (Asp-Glu-Ala-Asp) box polypeptide 3, Y-linked (Ddx3y), mRNA [NM_012008]	355.883	up	0.809144	-7.66612	chrY	598215	-	FALSE	mm|YqA1	26900	NM_012008	DEAD (Asp-Glu-Ala-Asp) box polypeptide 3, Y-linked	chrY:598274-598215	GO:0008026|GO:0005737|GO:0016787|GO:0000166|GO:0003723|GO:0004386|GO:0005634|GO:0003676|GO:0005524	NM_012008	Mm.302938
A_52_P648688	Zc3h12d	Mus musculus zinc finger CCCH type containing 12D (Zc3h12d), mRNA [NM_172785]	22.0613	up	-3.28671	-7.75016	chr10	7589850	+	FALSE	mm|10qA1	237256	NM_172785	zinc finger CCCH type containing 12D	chr10:7589850-7589909	GO:0008150|GO:0003674|GO:0005737|GO:0004518|GO:0004519|GO:0016787|GO:0008270|GO:0005575|GO:0003676|GO:0046872	NM_172785	Mm.140055
A_55_P2016842	Me1	Mus musculus malic enzyme 1, NADP(+)-dependent, cytosolic (Me1), transcript variant 2, mRNA [NM_001198933]	5.26414	up	-4.0103	-6.4065	chr9	86480571	-	FALSE	mm|9qE3.1	17436	NM_001198933	malic enzyme 1, NADP(+)-dependent, cytosolic	chr9:86480630-86480571	GO:0050661|GO:0030145|GO:0051262|GO:0004470|GO:0004473|GO:0006108|GO:0004471|GO:0005625|GO:0046872|GO:0005829|GO:0005739|GO:0016491|GO:0009725|GO:0055114	NM_001198933	Mm.148155
A_55_P2109445	Irf4	Mus musculus interferon regulatory factor 4 (Irf4), mRNA [NM_013674]	7.08067	up	-1.69131	-4.51519	chr13	30858532	+	FALSE	mm|13qA3.2	16364	NM_013674	interferon regulatory factor 4	chr13:30858532-30858591	GO:0000975|GO:0006355|GO:0003700|GO:0045404|GO:0005634|GO:0003677|GO:0006351|GO:0045086|GO:0005737|GO:0043966|GO:0043967|GO:0045944|GO:0043388|GO:0000788|GO:0045368|GO:0043011|GO:0045893|GO:0045082	NM_013674	Mm.4677
A_55_P1990944	Casp1	Mus musculus caspase 1 (Casp1), mRNA [NM_009807]	40.6464	up	-1.60064	-6.9457	chr9	5307206	+	FALSE	mm|9qA1	12362	NM_009807	caspase 1	chr9:5307206-5307265	GO:0005515|GO:0008219|GO:0014070|GO:0005634|GO:0050715|GO:0042221|GO:0005829|GO:0005622|GO:0005737|GO:0050717|GO:0050718|GO:0016485|GO:0006508|GO:0032496|GO:0033198|GO:0007613|GO:0001774|GO:0046010|GO:0001666|GO:0043065|GO:0071310|GO:0042493|GO:0006915|GO:0042981|GO:0007520|GO:0005576|GO:0006917|GO:0004197|GO:0016787|GO:0032611|GO:0008233|GO:0008234	NM_009807	Mm.1051
A_51_P386670	Dse	Mus musculus dermatan sulfate epimerase (Dse), mRNA [NM_172508]	11.8762	up	-3.60155	-7.17155	chr10	33871876	-	FALSE	mm|10qB1	212898	NM_172508	dermatan sulfate epimerase	chr10:33871935-33871876	GO:0030208|GO:0005794|GO:0016020|GO:0005783|GO:0047757|GO:0016021|GO:0016853	NM_172508	Mm.34557
A_55_P2135986	Ms4a4c	Mus musculus membrane-spanning 4-domains, subfamily A, member 4C (Ms4a4c), mRNA [NM_029499]	20.7456	up	-2.10451	-6.47925	chr19	11493486	+	FALSE	mm|19qA	64380	NM_029499	membrane-spanning 4-domains, subfamily A, member 4C	chr19:11493486-11493545	GO:0008150|GO:0003674|GO:0005575	NM_029499	Mm.440715
A_51_P271503	Il1r1	Mus musculus interleukin 1 receptor, type I (Il1r1), transcript variant 1, mRNA [NM_008362]	16.1703	up	-3.04861	-7.06388	chr1	40372667	+	FALSE	mm|1qB	16177	NM_008362	interleukin 1 receptor, type I	chr1:40372667-40372726	GO:0005515|GO:0005886|GO:0009986|GO:0019221|GO:0031224|GO:0002020|GO:0005161|GO:0004909|GO:0007165|GO:0016020|GO:0045087|GO:0004908|GO:0004872|GO:0004871|GO:0016021|GO:0070555|GO:0070498|GO:0004888	NM_008362	Mm.896
A_52_P512575	Hopx	Mus musculus HOP homeobox (Hopx), transcript variant 1, mRNA [NM_175606]	7.828	up	-2.55743	-5.52607	chr5	77516460	-	FALSE	mm|5qC3.3	74318	NM_175606	HOP homeobox	chr5:77516519-77516460	GO:0005515|GO:0006355|GO:0016575|GO:0003700|GO:0048286|GO:0008016|GO:0005634|GO:0007275|GO:0000122|GO:0001829|GO:0003677|GO:0006351|GO:0043565|GO:0007507|GO:0005737|GO:0043415|GO:0051155|GO:0045596	NM_175606	Mm.181852
A_55_P2039250	Mboat2	Mus musculus membrane bound O-acyltransferase domain containing 2 (Mboat2), transcript variant 1, mRNA [NM_026037]	7.70046	up	-2.37445	-5.3194	chr12	25644491	+	FALSE	mm|12qA1.3	67216	NM_026037	membrane bound O-acyltransferase domain containing 2	chr12:25644491-25644550	GO:0008150|GO:0003674|GO:0047184|GO:0016020|GO:0005783|GO:0016021|GO:0008654|GO:0005575|GO:0016740|GO:0008415	NM_026037	Mm.167671
A_55_P2128526	Pfn2	Mus musculus profilin 2 (Pfn2), mRNA [NM_019410]	5.35133	down	-1.38945	1.03045	chr3	57645886	-	FALSE	mm|3qD	18645	NM_019410	profilin 2	chr3:57645945-57645886	GO:0005515|GO:0005737|GO:0030833|GO:0030036|GO:0030838|GO:0043195|GO:2000300|GO:0030837|GO:0007010|GO:0003779|GO:0015629|GO:0005856	NM_019410	Mm.271744
A_52_P620898	Ajap1	Mus musculus adherens junction associated protein 1 (Ajap1), mRNA [NM_001099299]	14.4354	up	-0.745845	-4.59739	chr4	152747397	-	FALSE	mm|4qE2	230959	NM_001099299	adherens junction associated protein 1	chr4:152747456-152747397	GO:0008150|GO:0003674|GO:0030054|GO:0016020|GO:0005886|GO:0016021|GO:0005575|GO:0007155	NM_001099299	Mm.318874
A_52_P54261	Tmem56	Mus musculus transmembrane protein 56 (Tmem56), mRNA [NM_178936]	5.24433	up	-5.3423	-7.73306	chr3	120905240	-	FALSE	mm|3qG1	99887	NM_178936	transmembrane protein 56	chr3:120905299-120905240	GO:0008150|GO:0003674|GO:0016020|GO:0016021|GO:0005575	NM_178936	Mm.26088
A_52_P15388	Ltf	Mus musculus lactotransferrin (Ltf), mRNA [NM_008522]	49.6197	up	-1.05629	-6.68912	chr9	110942873	+	FALSE	mm|9qF3	17002	NM_008522	lactotransferrin	chr9:110942873-110942932	GO:0005737|GO:0008152|GO:0008233|GO:0030141|GO:0008201	NM_008522	Mm.282359
A_52_P648601	Dusp9	Mus musculus dual specificity phosphatase 9 (Dusp9), mRNA [NM_029352]	17.7033	up	-3.57559	-7.72153	chrX	70888467	+	FALSE	mm|XqA7.3	75590	NM_029352	dual specificity phosphatase 9	chrX:70888467-70888526	GO:0000188|GO:0016310|GO:0005737|GO:0006470|GO:0016301|GO:0005783|GO:0016311|GO:0017017|GO:0005829	NM_029352	Mm.16479
A_55_P2164102		immunoglobulin heavy variable V1-12 [Source:MGI Symbol;Acc:MGI:3646284] [ENSMUST00000103500]	5.21665	down	-1.63831	0.744812	chr12	115854199	-	FALSE	mm|12qF2		AB159942		chr12:115854258-115854199			Mm.390493
A_55_P2179587	Celsr3	Mus musculus cadherin, EGF LAG seven-pass G-type receptor 3 (flamingo homolog, Drosophila) (Celsr3), mRNA [NM_080437]	5.61123	up	-5.11219	-7.60051	chr9	108755235	+	FALSE	mm|9qF2	107934	NM_080437	cadherin, EGF LAG seven-pass G-type receptor 3 (flamingo homolog, Drosophila)	chr9:108755235-108755294	GO:0005886|GO:0004930|GO:0005509|GO:0007275|GO:0007165|GO:0007413|GO:0016020|GO:0007186|GO:0007218|GO:0004872|GO:0016021|GO:0004871|GO:0001764|GO:0007155|GO:0007156|GO:0007166|GO:0004888	NM_080437	Mm.39945
A_66_P108003	Espn	Mus musculus espin (Espn), transcript variant 1, mRNA [NM_207687]	5.14821	down	-1.93209	0.431982	chr4	151495188	-	FALSE	mm|4qE2	56226	NM_207687	espin	chr4:151495247-151495188	GO:0017124|GO:0030054|GO:0007605|GO:0030046|GO:0003779|GO:0032421|GO:0042995|GO:0015629|GO:0005903|GO:0005902|GO:0005737|GO:0051015|GO:0031941|GO:0051639|GO:0051494|GO:0007626|GO:0005856|GO:0051017	NM_207687	Mm.264215
A_55_P2065140	A930003A15Rik	Mus musculus RIKEN cDNA A930003A15 gene (A930003A15Rik), transcript variant 1, non-coding RNA [NR_015488]	10.5055	down	-5.90627	-2.51319	chr16	19883974	-	FALSE	mm|16qA3	68162	NR_015488	RIKEN cDNA A930003A15 gene	chr16:19884033-19883974	GO:0008150|GO:0003674|GO:0005575	NR_015488	Mm.35159
A_66_P135106	Slco3a1	Mus musculus solute carrier organic anion transporter family, member 3a1 (Slco3a1), transcript variant 2, mRNA [NM_001038643]	15.6586	up	-3.60724	-7.57613	chr7	81420362	-	FALSE	mm|7qD2	108116	NM_001038643	solute carrier organic anion transporter family, member 3a1	chr7:81420421-81420362	GO:0005215|GO:0005886|GO:0009986|GO:0015347|GO:0043252|GO:0016324|GO:0034220|GO:0009925|GO:0016020|GO:0006857|GO:0015732|GO:0005887|GO:0006810|GO:0015711|GO:0008514|GO:0016021|GO:0006811|GO:0015198	NM_001038643	Mm.425467
A_55_P2111380	Ctnnd2	Mus musculus catenin (cadherin associated protein), delta 2 (Ctnnd2), mRNA [NM_008729]	33.782	up	0.38401	-4.69418	chr15	30959005	+	FALSE	mm|15qB2	18163	NM_008729	catenin (cadherin associated protein), delta 2	chr15:30959005-30959064	GO:0006355|GO:0030054|GO:0048167|GO:0005488|GO:0014069|GO:0007275|GO:0005634|GO:0007612|GO:0019717|GO:0007155|GO:0006351|GO:0001763	NM_008729	Mm.321648
A_52_P508700	Zfp951	Mus musculus zinc finger protein 951 (Zfp951), mRNA [NM_001039231]	5.97385	up	-4.23778	-6.81644	chr5	105242289	-	FALSE	mm|5qE5	626391	NM_001039231	zinc finger protein 951	chr5:105242348-105242289	GO:0008150|GO:0003674|GO:0005575|GO:0046872	NM_001039231	Mm.385405
A_55_P1978216	AF251705	Mus musculus cDNA sequence AF251705 (AF251705), mRNA [NM_134158]	9.0646	up	0.944115	-2.23613	chr11	114858084	-	FALSE	mm|11qE2	140497	NM_134158	cDNA sequence AF251705	chr11:114858143-114858084	GO:0005515|GO:0016020|GO:0005886|GO:0004872|GO:0050715|GO:0016021	NM_134158	Mm.2699
A_55_P2144386	Emr1	Mus musculus EGF-like module containing, mucin-like, hormone receptor-like sequence 1 (Emr1), mRNA [NM_010130]	6.2803	up	1.45737	-1.19346	chr17	57622868	+	FALSE	mm|17qD	13733	NM_010130	EGF-like module containing, mucin-like, hormone receptor-like sequence 1	chr17:57622868-57622927	GO:0005886|GO:0004930|GO:0005509|GO:0007165|GO:0007186|GO:0016020|GO:0007218|GO:0004872|GO:0004871|GO:0016021|GO:0007166|GO:0009897|GO:0004888	NM_010130	Mm.2254
A_55_P1961335	Ctsk	Mus musculus cathepsin K (Ctsk), mRNA [NM_007802]	6.35308	up	-2.33488	-5.00234	chr3	95313165	+	FALSE	mm|3qF2.1	13038	NM_007802	cathepsin K	chr3:95313165-95313224	GO:0004197|GO:0005737|GO:0016787|GO:0045453|GO:0006508|GO:0008233|GO:0008234|GO:0005764|GO:0005615	NM_007802	Mm.272085
A_55_P2038767	Fam49a	Mus musculus family with sequence similarity 49, member A (Fam49a), transcript variant 1, mRNA [NM_029758]	15.6453	up	-0.759482	-4.72714	chr12	12379745	+	FALSE	mm|12qA1.1	76820	NM_029758	family with sequence similarity 49, member A	chr12:12379745-12379804	GO:0005622|GO:0008150|GO:0003674	NM_029758	Mm.440802
A_55_P1979147	Klrb1c	Mus musculus killer cell lectin-like receptor subfamily B member 1C (Klrb1c), transcript variant 1, mRNA [NM_001159904]	5.46081	up	-4.0057	-6.45481	chr6	128729611	-	FALSE	mm|6qF3	17059	NM_001159904	killer cell lectin-like receptor subfamily B member 1C	chr6:128729670-128729611	GO:0007165|GO:0016020|GO:0005887|GO:0005488|GO:0045954|GO:0005529|GO:0004872|GO:0016021|GO:0042803|GO:0009897	NM_001159904	Mm.480764
A_51_P248666	Cd274	Mus musculus CD274 antigen (Cd274), mRNA [NM_021893]	5.69551	up	-1.86348	-4.3733	chr19	29462363	+	FALSE	mm|19qC1	60533	NM_021893	CD274 antigen	chr19:29462363-29462422	GO:0005515|GO:0016020|GO:0005886|GO:0004872|GO:0016021|GO:0009897|GO:0042130	NM_021893	Mm.245363
A_55_P2023042	1700019E19Rik	Mus musculus RIKEN cDNA 1700019E19 gene (1700019E19Rik), transcript variant 1, mRNA [NM_001199843]	6.47764	up	-2.16184	-4.85731	chr12	87503290	+	FALSE	mm|12qD2	76411	NM_001199843	RIKEN cDNA 1700019E19 gene	chr12:87503290-87503349	GO:0003674|GO:0060271|GO:0030030|GO:0005575|GO:0035721	NM_001199843	Mm.292345
A_65_P20249	Prkcb	Mus musculus protein kinase C, beta (Prkcb), mRNA [NM_008855]	10.3654	up	-1.67596	-5.04966	chr7	129776886	+	FALSE	mm|7qF3	18751	NM_008855	protein kinase C, beta	chr7:129776886-129776945	GO:0050853|GO:0005515|GO:0034339|GO:0005886|GO:0005634|GO:0050681|GO:0031526|GO:0046872|GO:0014059|GO:0005829|GO:0035556|GO:0042393|GO:0005737|GO:0030374|GO:0000166|GO:0016301|GO:0005080|GO:0006816|GO:0043123|GO:0016772|GO:0005813|GO:0006355|GO:0035408|GO:0005246|GO:0042493|GO:0006874|GO:0005624|GO:0006915|GO:0005625|GO:0005626|GO:0005524|GO:0006351|GO:0035403|GO:0042113|GO:0016310|GO:0004672|GO:…	NM_008855	Mm.207496
A_55_P2008031	Ydjc	YdjC homolog (bacterial) [Source:MGI Symbol;Acc:MGI:1916351] [ENSMUST00000145198]	5.5492	up	-3.95762	-6.4299	chr16	17151318	+	FALSE	mm|16qA3	69101	AK076869	YdjC homolog (bacterial)	chr16:17151318-17151377	GO:0008150|GO:0003674|GO:0016810|GO:0005975|GO:0005575		Mm.101656
A_52_P429450	Ngp	Mus musculus neutrophilic granule protein (Ngp), mRNA [NM_008694]	52.5545	up	-1.79212	-7.50786	chr9	110324266	+	FALSE	mm|9qF2	18054	NM_008694	neutrophilic granule protein	chr9:110324266-110324814	GO:0008150|GO:0003674|GO:0031410	NM_008694	Mm.236225
A_55_P1982947			5.0447	down	-5.21309	-2.87832	chr9	50949283	-	FALSE	mm|9qA5.3				chr9:050949342-050949283
A_51_P200517	Rasgef1a	Mus musculus RasGEF domain family, member 1A (Rasgef1a), mRNA [NM_027526]	15.2819	up	-3.74163	-7.67539	chr6	118041496	+	FALSE	mm|6qF1	70727	NM_027526	RasGEF domain family, member 1A	chr6:118041496-118041555	GO:0005085|GO:0050790|GO:0016477|GO:0005575|GO:0005088	NM_027526	Mm.87660
A_55_P2044922	Gpr82	Mus musculus G protein-coupled receptor 82 (Gpr82), mRNA [NM_175669]	5.71703	up	-5.16349	-7.67876	chrX	13244381	+	FALSE	mm|XqA1.1	319200	NM_175669	G protein-coupled receptor 82	chrX:13244381-13244440	GO:0008150|GO:0007165|GO:0003674|GO:0016020|GO:0007186|GO:0005886|GO:0004930|GO:0004872|GO:0016021|GO:0005575|GO:0004871	NM_175669	Mm.383294
A_51_P282667	Hexa	Mus musculus hexosaminidase A (Hexa), mRNA [NM_010421]	6.84058	up	1.88125	-0.892866	chr9	59411712	+	FALSE	mm|9qB	15211	NM_010421	hexosaminidase A	chr9:59411712-59411771	GO:0004563|GO:0046982|GO:0043169|GO:0019915|GO:0005975|GO:0042552|GO:0006689|GO:0007605|GO:0003824|GO:0005764|GO:0004553|GO:0019953|GO:0001501|GO:0048667|GO:0016787|GO:0016020|GO:0016798|GO:0050884|GO:0008152|GO:0050885|GO:0007628|GO:0007626|GO:0030203|GO:0007040	NM_010421	Mm.2284
A_52_P683580	Tbc1d9	Mus musculus TBC1 domain family, member 9 (Tbc1d9), transcript variant 2, mRNA [NM_027758]	12.4067	up	-3.98049	-7.61354	chr8	85796352	+	FALSE	mm|8qC2	71310	NM_027758	TBC1 domain family, member 9	chr8:85796352-85796411	GO:0005622|GO:0008150|GO:0003674|GO:0032313|GO:0005509|GO:0005575|GO:0005097|GO:0005096	NM_027758	Mm.24031
A_55_P2183587	Gli1	Mus musculus GLI-Kruppel family member GLI1 (Gli1), mRNA [NM_010296]	7.30217	down	-3.70656	-0.838235	chr10	126766967	-	FALSE	mm|10qD3	14632	NM_010296	GLI-Kruppel family member GLI1	chr10:126767026-126766967	GO:0005515|GO:0008017|GO:0008284|GO:0044212|GO:0030324|GO:0003705|GO:0021696|GO:0021983|GO:0005634|GO:0009954|GO:0007283|GO:0009953|GO:0046872|GO:0030154|GO:0005829|GO:0007224|GO:0005622|GO:0045880|GO:0005737|GO:0045944|GO:0090090|GO:0006355|GO:0060032|GO:0021938|GO:0045740|GO:0007275|GO:0003676|GO:0003677|GO:0006351|GO:0001649|GO:0007418|GO:0009913|GO:0005929|GO:0007165|GO:0003682|GO:0008270|GO:…	NM_010296	Mm.391450
A_52_P203691	Arl5c	Mus musculus ADP-ribosylation factor-like 5C (Arl5c), mRNA [NM_207231]	19.0663	up	-1.11423	-5.36719	chr11	97850952	-	FALSE	mm|11qD	217151	NM_207231	ADP-ribosylation factor-like 5C	chr11:97851011-97850952	GO:0008150|GO:0003674|GO:0000166|GO:0005575|GO:0005525	NM_207231	Mm.277896
A_55_P2171413	Me1	Mus musculus malic enzyme 1, NADP(+)-dependent, cytosolic (Me1), transcript variant 2, mRNA [NM_001198933]	7.17168	up	-3.63072	-6.47303	chr9	86475215	-	FALSE	mm|9qE3.1	17436	NM_001198933	malic enzyme 1, NADP(+)-dependent, cytosolic	chr9:86475274-86475215	GO:0050661|GO:0030145|GO:0051262|GO:0004470|GO:0004473|GO:0006108|GO:0004471|GO:0005625|GO:0046872|GO:0005829|GO:0005739|GO:0016491|GO:0009725|GO:0055114	NM_001198933	Mm.148155
A_55_P2054409	Pira2	Mus musculus paired-Ig-like receptor A2 (Pira2), mRNA [NM_011089]	18.6342	up	0.826471	-3.39341	chr7	3788573	-	FALSE	mm|7qA1	18725	NM_011089	paired-Ig-like receptor A2	chr7:3788632-3788573	GO:0008150|GO:0003674|GO:0005575	NM_011089	Mm.482470
A_51_P174696	Casq2	Mus musculus calsequestrin 2 (Casq2), nuclear gene encoding mitochondrial protein, mRNA [NM_009814]	5.00913	down	-7.40272	-5.07816	chr3	101949827	+	FALSE	mm|3qF2.2	12373	NM_009814	calsequestrin 2	chr3:101949827-101949884	GO:0006937|GO:0016529|GO:0005509	NM_009814	Mm.15343
A_52_P409578	Rassf4	Mus musculus Ras association (RalGDS/AF-6) domain family member 4 (Rassf4), mRNA [NM_178045]	10.2919	up	-1.43441	-4.79786	chr6	116583451	-	FALSE	mm|6qE3	213391	NM_178045	Ras association (RalGDS/AF-6) domain family member 4	chr6:116583510-116583451	GO:0008150|GO:0007165|GO:0003674|GO:0007049|GO:0005575	NM_178045	Mm.257931
A_52_P200458	Fut4	Mus musculus fucosyltransferase 4 (Fut4), mRNA [NM_010242]	54.3051	up	-1.80585	-7.56886	chr9	14553224	-	FALSE	mm|9qA2	14345	NM_010242	fucosyltransferase 4	chr9:14553283-14553224	GO:0046920|GO:0005794|GO:0016020|GO:0009986|GO:0016757|GO:0008417|GO:0006486|GO:0016021|GO:0016740|GO:0071944	NM_010242	Mm.63450
A_55_P2100212	Cfc1	Mus musculus cripto, FRL-1, cryptic family 1 (Cfc1), mRNA [NM_007685]	8.7318	up	-4.57079	-7.69707	chr1	34601097	+	FALSE	mm|1qB	12627	NM_007685	cripto, FRL-1, cryptic family 1	chr1:34601097-34601156	GO:0007368|GO:0007369|GO:0005886|GO:0060413|GO:0005576|GO:0007275|GO:0031225|GO:0030509|GO:0048536|GO:0009791|GO:0009952|GO:0048856|GO:0048546|GO:0060460|GO:0001889|GO:0001947|GO:0003007|GO:0060541|GO:0007492|GO:0016020|GO:0060070	NM_007685	Mm.2531
A_55_P1962906	Als2cl	Mus musculus ALS2 C-terminal like (Als2cl), transcript variant 1, mRNA [NM_001146060]	11.4507	up	-4.14967	-7.66703	chr9	110802956	+	FALSE	mm|9qF3	235633	NM_001146060	ALS2 C-terminal like	chr9:110802956-110803015	GO:0005515|GO:0017112|GO:0017137|GO:0035023|GO:0042802|GO:0005622|GO:0005737|GO:0050790|GO:0008104|GO:0016023|GO:0007032|GO:0005089|GO:0005096	NM_001146060	Mm.86338
A_51_P193146	Ms4a6c	Mus musculus membrane-spanning 4-domains, subfamily A, member 6C (Ms4a6c), transcript variant 1, mRNA [NM_028595]	38.9567	up	-1.27048	-6.55428	chr19	11545580	+	FALSE	mm|19qA	73656	NM_028595	membrane-spanning 4-domains, subfamily A, member 6C	chr19:11545580-11545639	GO:0016020|GO:0004872|GO:0016021	NM_028595	Mm.440755
A_55_P2023336	LOC100041550	Mus musculus hypothetical protein LOC100041550 (LOC100041550), mRNA [NM_001199332]	15.3245	up	-3.7534	-7.69117	chrY_random	8781843	-	FALSE		100041550	NM_001199332	hypothetical protein LOC100041550	chrY_random:8781900-8781843		NM_001199332	Mm.485768
A_55_P1978316	Adamts14	Mus musculus a disintegrin-like and metallopeptidase (reprolysin type) with thrombospondin type 1 motif, 14 (Adamts14), mRNA [NM_001081127]	6.71718	up	-4.93839	-7.68624	chr10	60659860	-	FALSE	mm|10qB4	237360	NM_001081127	a disintegrin-like and metallopeptidase (reprolysin type) with thrombospondin type 1 motif, 14	chr10:60659919-60659860	GO:0016787|GO:0007229|GO:0030199|GO:0008152|GO:0008233|GO:0005576|GO:0046872|GO:0008237	NM_001081127	Mm.333252
A_66_P122086	9030619P08Rik	Mus musculus RIKEN cDNA 9030619P08 gene (9030619P08Rik), mRNA [NM_001039720]	9.16574	up	-1.36465	-4.5609	chr15	75260421	-	FALSE	mm|15qD3	105892	NM_001039720	RIKEN cDNA 9030619P08 gene	chr15:75261818-75260421	GO:0008150|GO:0003674|GO:0005575	NM_001039720	Mm.38909
A_65_P09285	2610524H06Rik	Mus musculus RIKEN cDNA 2610524H06 gene (2610524H06Rik), mRNA [NM_181075]	34.1684	up	-0.415611	-5.5102	chr5	115272413	-	FALSE	mm|5qF	330173	NM_181075	RIKEN cDNA 2610524H06 gene	chr5:115272472-115272413	GO:0008150|GO:0003674|GO:0005575	NM_181075	Mm.482205
A_52_P575178	Cdon	Mus musculus cell adhesion molecule-related/down-regulated by oncogenes (Cdon), mRNA [NM_021339]	5.83486	up	-3.61149	-6.15618	chr9	35315141	+	FALSE	mm|9qA4	57810	NM_021339	cell adhesion molecule-related/down-regulated by oncogenes	chr9:35315141-35315200	GO:0005515|GO:0043497|GO:0021987|GO:0009952|GO:0048598|GO:0014816|GO:0007224|GO:0016337|GO:0002088|GO:0045944|GO:0016202|GO:0007155|GO:2000179|GO:0010172|GO:0009986|GO:0001708|GO:0051057|GO:0007520|GO:0060059|GO:0048643|GO:0051149|GO:0016020|GO:0005887|GO:0045666|GO:0045663|GO:0045664|GO:0001934|GO:0016021|GO:0043410|GO:0051146	NM_021339	Mm.80509
A_55_P2019719	Oas2	Mus musculus 2'-5' oligoadenylate synthetase 2 (Oas2), mRNA [NM_145227]	16.7442	up	0.989987	-3.07561	chr5	121180343	-	FALSE	mm|5qF	246728	NM_145227	2'-5' oligoadenylate synthetase 2	chr5:121180402-121180343	GO:0001730|GO:0005575|GO:0006401	NM_145227	Mm.260926
A_52_P15966		immunoglobulin heavy variable 1-84 [Source:MGI Symbol;Acc:MGI:3644235] [ENSMUST00000103551]	13.6445	up	-3.23689	-7.00714	chr12	117218996	-	FALSE	mm|12qF2		AF303856		chr12:117219055-117218996			Mm.390539
A_55_P1983523	Cd300ld	Mus musculus CD300 molecule-like family member d (Cd300ld), mRNA [NM_145437]	5.48048	up	-1.02344	-3.47774	chr11	114843796	-	FALSE	mm|11qE2	217305	NM_145437	CD300 molecule-like family member d	chr11:114843855-114843796	GO:0016020|GO:0005886|GO:0004872|GO:0016021	NM_145437	Mm.275986
A_51_P387123	Oasl2	Mus musculus 2'-5' oligoadenylate synthetase-like 2 (Oasl2), mRNA [NM_011854]	8.78194	up	-0.157622	-3.29216	chr5	115362168	+	FALSE	mm|5qF	23962	NM_011854	2'-5' oligoadenylate synthetase-like 2	chr5:115362168-115362227	GO:0001730|GO:0008152|GO:0005575	NM_011854	Mm.228363
A_52_P152631	Tmem17	Mus musculus transmembrane protein 17 (Tmem17), mRNA [NM_153596]	11.4536	up	-3.67483	-7.19256	chr11	22418937	+	FALSE	mm|11qA3.2	103765	NM_153596	transmembrane protein 17	chr11:22418937-22418996	GO:0008150|GO:0003674|GO:0016020|GO:0016021|GO:0005575	NM_153596	Mm.221274
A_51_P161890	Fcgrt	Mus musculus Fc receptor, IgG, alpha chain transporter (Fcgrt), mRNA [NM_010189]	8.53045	up	-1.59817	-4.69079	chr7	52350556	-	FALSE	mm|7qB4	14132	NM_010189	Fc receptor, IgG, alpha chain transporter	chr7:52350615-52350556	GO:0030881|GO:0006955|GO:0016020|GO:0005886|GO:0019882|GO:0019864|GO:0042612|GO:0004872|GO:0016021	NM_010189	Mm.3303
A_51_P290576	Plk2	Mus musculus polo-like kinase 2 (Drosophila) (Plk2), mRNA [NM_152804]	6.37554	up	-3.66626	-6.3388	chr13	111190915	+	FALSE	mm|13qD2.2	20620	NM_152804	polo-like kinase 2 (Drosophila)	chr13:111190915-111190974	GO:0005515|GO:0005524|GO:0007165|GO:0016310|GO:0004672|GO:0000166|GO:0004674|GO:0016301|GO:0006468|GO:0004871|GO:0043123|GO:0000278|GO:0016740|GO:0016772	NM_152804	Mm.380
A_55_P2038262	Gm4902	Mus musculus predicted gene 4902 (Gm4902), mRNA [NM_001164327]	7.272	up	-0.857077	-3.71943	chr14	59939869	-	FALSE	mm|14qC3	236451	NM_001164327	predicted gene 4902	chr14:59939928-59939869	GO:0008150|GO:0003674|GO:0005575	NM_001164327	Mm.247736
A_55_P2122709	Arhgef3	Mus musculus Rho guanine nucleotide exchange factor (GEF) 3 (Arhgef3), mRNA [NM_027871]	10.1772	up	-0.684833	-4.03211	chr14	28216851	+	FALSE	mm|14qA3	71704	NM_027871	Rho guanine nucleotide exchange factor (GEF) 3	chr14:28216851-28216910	GO:0035556|GO:0005622|GO:0005085|GO:0008624|GO:0005737|GO:0035023|GO:0006915|GO:0005089|GO:0005829	NM_027871	Mm.248606
A_55_P2039865	LOC100042072	PREDICTED: Mus musculus y-linked testis-specific protein 1-like, transcript variant 2 (LOC100041207), mRNA [XM_001475500]	5.24333	up	-5.19313	-7.58361	chrY_random	25929657	+	FALSE		100042072	XM_001475500	y-linked testis-specific protein 1-like	chrY_random:25929657-25929717		XM_001475500
A_55_P2101191	Arrdc4	Mus musculus arrestin domain containing 4 (Arrdc4), transcript variant 2, mRNA [NM_025549]	5.75559	up	-1.04714	-3.5721	chr7	75886496	-	FALSE	mm|7qD1	66412	NM_025549	arrestin domain containing 4	chr7:75886555-75886496	GO:0008150|GO:0003674|GO:0005575	NM_025549	Mm.251199
A_51_P479132	Zcchc3	Mus musculus zinc finger, CCHC domain containing 3 (Zcchc3), mRNA [NM_175126]	16.1246	up	-2.45188	-6.46307	chr2	152238866	-	FALSE	mm|2qH1	67917	NM_175126	zinc finger, CCHC domain containing 3	chr2:152238925-152238866	GO:0008150|GO:0003674|GO:0005575|GO:0046872	NM_175126	Mm.391810
A_51_P502798	Fam55d	Mus musculus family with sequence similarity 55, member D (Fam55d), mRNA [NM_172921]	13.112	up	-3.94883	-7.66164	chr9	48207362	+	FALSE	mm|9qA5.3	244853	NM_172921	family with sequence similarity 55, member D	chr9:48207362-48207421	GO:0008150|GO:0003674|GO:0005576|GO:0005575	NM_172921	Mm.325522
A_52_P549279	Itgae	Mus musculus integrin alpha E, epithelial-associated (Itgae), transcript variant 2, mRNA [NM_172944]	7.96841	up	-4.65333	-7.64763	chr11	72945236	+	FALSE	mm|11qB4	16407	NM_172944	integrin alpha E, epithelial-associated	chr11:72945236-72946221	GO:0016020|GO:0007229|GO:0004872|GO:0016021|GO:0007155|GO:0009897	NM_172944	Mm.96
A_55_P1973130		RIKEN cDNA D830039M14 gene [Source:MGI Symbol;Acc:MGI:2445111] [ENSMUST00000051330]	9.34109	down	-7.27576	-4.05217	chr10	60938251	-	FALSE	mm|10qB4		AK028369		chr10:60938310-60938251			Mm.136116
A_55_P2045055	Clec10a	Mus musculus C-type lectin domain family 10, member A (Clec10a), transcript variant 1, mRNA [NM_001204252]	51.698	up	-1.87974	-7.57177	chr11	69984254	+	FALSE	mm|11qB3	17312	NM_001204252	C-type lectin domain family 10, member A	chr11:69984254-69984313	GO:0016020|GO:0005488|GO:0005529|GO:0016021	NM_001204252	Mm.252405
A_51_P325281	AI607873	Mus musculus expressed sequence AI607873 (AI607873), mRNA [NM_001204910]	18.4981	up	-3.34041	-7.54972	chr1	175666571	-	FALSE	mm|1qH3	226691	NM_001204910	expressed sequence AI607873	chr1:175671746-175666571	GO:0008150|GO:0003674|GO:0005575	NM_001204910	Mm.440876
A_51_P230439	Ppfibp2	Mus musculus PTPRF interacting protein, binding protein 2 (liprin beta 2) (Ppfibp2), transcript variant 1, mRNA [NM_008905]	32.2081	up	-1.52372	-6.53307	chr7	114888246	+	FALSE	mm|7qE3	19024	NM_008905	PTPRF interacting protein, binding protein 2 (liprin beta 2)	chr7:114888246-114888305	GO:0008907|GO:0015074|GO:0003677	NM_008905	Mm.2817
A_52_P660861	Napb	Mus musculus N-ethylmaleimide sensitive fusion protein attachment protein beta (Napb), mRNA [NM_019632]	5.68466	up	-4.37922	-6.88629	chr2	148520788	-	FALSE	mm|2qG3	17957	NM_019632	N-ethylmaleimide sensitive fusion protein attachment protein beta	chr2:148520847-148520788	GO:0035494|GO:0019905|GO:0005515|GO:0016020|GO:0005488|GO:0035249|GO:0010807|GO:0006810|GO:0016192|GO:0015031|GO:0006886|GO:0070044	NM_019632	Mm.274308
A_55_P1958275	Bcl11a	Mus musculus B-cell CLL/lymphoma 11A (zinc finger protein) (Bcl11a), transcript variant 1, mRNA [NM_016707]	47.6846	up	2.53486	-3.04059	chr11	24073114	+	FALSE	mm|11qA3.2	14025	NM_016707	B-cell CLL/lymphoma 11A (zinc finger protein)	chr11:24073114-24073173	GO:0005515|GO:0006355|GO:0046982|GO:0003714|GO:0016925|GO:0005634|GO:0003676|GO:0048671|GO:0046872|GO:0006351|GO:0048672|GO:0005622|GO:0005737|GO:0030217|GO:0030517|GO:0045944|GO:0030183|GO:0010629|GO:0010976|GO:0050773|GO:0010977|GO:0008270|GO:2000171	NM_016707	Mm.53687
A_55_P2252891	D11Ertd717e	Mus musculus adult retina cDNA, RIKEN full-length enriched library, clone:A930017D03 product:unclassifiable, full insert sequence. [AK160358]	5.97293	up	-4.07875	-6.65719	chr11	100914373	+	FALSE	mm|11qD	52704	AK160358	DNA segment, Chr 11, ERATO Doi 717, expressed	chr11:100914373-100914432			Mm.449263
A_55_P1978424	Bcl2a1d	Mus musculus B-cell leukemia/lymphoma 2 related protein A1d (Bcl2a1d), mRNA [NM_007536]	145.394	up	1.42872	-5.75511	chr9	88618165	-	FALSE	mm|9qE3.1	12047	NM_007536	B-cell leukemia/lymphoma 2 related protein A1d	chr9:88618224-88618165	GO:0010951|GO:0050852|GO:0051400|GO:0046982|GO:0030217|GO:0005575|GO:0043154|GO:0043027	NM_007536	Mm.378888
A_51_P382152	Procr	Mus musculus protein C receptor, endothelial (Procr), mRNA [NM_011171]	5.47781	up	-4.88558	-7.33918	chr2	155580945	+	FALSE	mm|2qH1	19124	NM_011171	protein C receptor, endothelial	chr2:155580945-155581004	GO:0050819|GO:0005813|GO:0004872|GO:0008022	NM_011171	Mm.3243
A_51_P436652	Ccl7	Mus musculus chemokine (C-C motif) ligand 7 (Ccl7), mRNA [NM_013654]	46.8219	up	-2.0621	-7.61122	chr11	81860656	+	FALSE	mm|11qC	20306	NM_013654	chemokine (C-C motif) ligand 7	chr11:81860656-81860715	GO:0008009|GO:0006955|GO:0006954|GO:0006935|GO:0031727|GO:0005576|GO:0008201|GO:0005615|GO:0005125	NM_013654	Mm.341574
A_52_P393314	P2rx7	Mus musculus purinergic receptor P2X, ligand-gated ion channel, 7 (P2rx7), transcript variant 1, mRNA [NM_011027]	6.90408	up	-1.05199	-3.83944	chr5	123134194	+	FALSE	mm|5qF	18439	NM_011027	purinergic receptor P2X, ligand-gated ion channel, 7	chr5:123134194-123134253	GO:0032755|GO:0005515|GO:0008219|GO:0010467|GO:0014070|GO:0006649|GO:0043132|GO:0031594|GO:0010524|GO:0034405|GO:0006900|GO:0010043|GO:0019228|GO:0006884|GO:0034220|GO:0016485|GO:0031668|GO:0043025|GO:0032496|GO:0006810|GO:0033198|GO:0001614|GO:0006509|GO:0043029|GO:0019717|GO:0030501|GO:0000287|GO:0004931|GO:0005507|GO:0032060|GO:0001845|GO:0043085|GO:0016079|GO:0032059|GO:0005887|GO:0002028|GO:…	NM_011027	Mm.42026
A_51_P229676	Plscr1	Mus musculus phospholipid scramblase 1 (Plscr1), mRNA [NM_011636]	18.1088	up	-0.994521	-5.17314	chr9	92166424	+	FALSE	mm|9qE3.3	22038	NM_011636	phospholipid scramblase 1	chr9:92166424-92166483	GO:0017124|GO:0006955|GO:0016020|GO:0030099|GO:0016021|GO:0009615	NM_011636	Mm.441702
A_51_P187750	Neurl3	Mus musculus neuralized homolog 3 homolog (Drosophila) (Neurl3), mRNA [NM_153408]	9.08281	up	-2.73987	-5.92301	chr1	36322254	-	FALSE	mm|1qB	214854	NM_153408	neuralized homolog 3 homolog (Drosophila)	chr1:36322313-36322254	GO:0008150|GO:0003674|GO:0016874|GO:0008270|GO:0005575|GO:0046872	NM_153408	Mm.389110
A_55_P2038358	Acot1	Mus musculus acyl-CoA thioesterase 1 (Acot1), mRNA [NM_012006]	21.6252	up	-3.15847	-7.59311	chr12	85358561	+	FALSE	mm|12qD1	26897	NM_012006	acyl-CoA thioesterase 1	chr12:85358561-85358620	GO:0006629|GO:0005739|GO:0004091|GO:0006637|GO:0005737|GO:0001676|GO:0016787|GO:0016290|GO:0016291|GO:0016790|GO:0005829	NM_012006	Mm.1978
A_55_P1959425	Slc16a3	Mus musculus solute carrier family 16 (monocarboxylic acid transporters), member 3 (Slc16a3), mRNA [NM_030696]	12.8343	up	-0.828581	-4.51051	chr11	120820023	+	FALSE	mm|11qE2	80879	NM_030696	solute carrier family 16 (monocarboxylic acid transporters), member 3	chr11:120820023-120820082	GO:0031965|GO:0016020|GO:0005886|GO:0015711|GO:0006810|GO:0015355|GO:0016021|GO:0015629|GO:0055085|GO:0015293	NM_030696	Mm.28632
A_55_P2093862		predicted gene 10716 [Source:MGI Symbol;Acc:MGI:3641972] [ENSMUST00000099042]	7.22016	up	1.03237	-1.81966	chr9	3030720	+	FALSE	mm|9qA1		AK156257		chr9:3030720-3030779
A_55_P2041444	Xlr3a	Mus musculus X-linked lymphocyte-regulated 3A (Xlr3a), mRNA [NM_001110784]	10.0819	down	-6.58661	-3.25291	chrX	70337114	-	FALSE	mm|XqA7.3	22445	NM_001110784	X-linked lymphocyte-regulated 3A	chrX:70337173-70337114	GO:0008150|GO:0003674|GO:0005575	NM_001110784	Mm.475098
A_55_P2023335			12.5816	up	-3.92882	-7.58206	chrY_random	6741838	+	FALSE					chrY_random:006741838-006741897
A_51_P174961	F10	Mus musculus coagulation factor X (F10), transcript variant 2, mRNA [NM_007972]	21.7036	up	-2.07602	-6.51588	chr8	13055774	+	FALSE	mm|8qA1.1	14058	NM_007972	coagulation factor X	chr8:13055774-13055833	GO:0005515|GO:0051897|GO:0005792|GO:0004252|GO:0005886|GO:0005509|GO:0005624|GO:0005576|GO:0003824|GO:0005543|GO:0016787|GO:0007596|GO:0007598|GO:0006508|GO:0008236|GO:0008233	NM_007972	Mm.262589
A_55_P1970424	D330028D13Rik	Mus musculus RIKEN cDNA D330028D13 gene (D330028D13Rik), transcript variant 1, mRNA [NM_172727]	7.98009	up	-4.0808	-7.0772	chr6	49339004	+	FALSE	mm|6qB2.3	231946	NM_172727	RIKEN cDNA D330028D13 gene	chr6:49339004-49339063	GO:0008150|GO:0003674|GO:0005575	NM_172727	Mm.35199
A_55_P2004179	Col2a1	Mus musculus collagen, type II, alpha 1 (Col2a1), transcript variant 2, mRNA [NM_001113515]	5.38764	up	-0.200395	-2.63005	chr15	97806071	-	FALSE	mm|15qF1	12824	NM_001113515	collagen, type II, alpha 1	chr15:97806130-97806071	GO:0010468|GO:0005581|GO:0051216|GO:0007605|GO:0048705|GO:0005615|GO:0005585|GO:0005737|GO:0001894|GO:0002062|GO:0060351|GO:0030199|GO:0060021|GO:0035108|GO:0048839|GO:0043066|GO:0042472|GO:0048407|GO:0005578|GO:0005576|GO:0006029|GO:0005604|GO:0031012|GO:0060348|GO:0003007|GO:0001958|GO:0001501|GO:0001502|GO:0060272|GO:0007601|GO:0005201	NM_001113515	Mm.2423
A_51_P293688	Rab32	Mus musculus RAB32, member RAS oncogene family (Rab32), mRNA [NM_026405]	27.7886	up	0.322697	-4.47372	chr10	10265134	-	FALSE	mm|10qA1	67844	NM_026405	RAB32, member RAS oncogene family	chr10:10265193-10265134	GO:0005739|GO:0000166|GO:0007264|GO:0015031|GO:0005525	NM_026405	Mm.31486
A_51_P362066	Chi3l1	Mus musculus chitinase 3-like 1 (Chi3l1), mRNA [NM_007695]	8.32288	up	-4.41744	-7.47452	chr1	136086448	+	FALSE	mm|1qE4	12654	NM_007695	chitinase 3-like 1	chr1:136086448-136086507	GO:0006032|GO:0043169|GO:0005975|GO:0005576|GO:0003824|GO:0005615|GO:0004568|GO:0004553	NM_007695	Mm.38274
A_55_P2082961	Fnbp1l	Mus musculus formin binding protein 1-like (Fnbp1l), transcript variant 1, mRNA [NM_001114665]	9.99062	up	-4.31498	-7.63555	chr3	122241899	-	FALSE	mm|3qG1	214459	NM_001114665	formin binding protein 1-like	chr3:122241958-122241899	GO:0008150|GO:0003674|GO:0005737|GO:0016020|GO:0005886|GO:0031410|GO:0005575|GO:0005856|GO:0008289|GO:0006897	NM_001114665	Mm.209491
A_55_P1976282	Prkcc	Mus musculus protein kinase C, gamma (Prkcc), mRNA [NM_011102]	5.39412	up	-4.3006	-6.73198	chr7	3330819	+	FALSE	mm|7qA1	18752	NM_011102	protein kinase C, gamma	chr7:3330819-3330878	GO:0005886|GO:0007635|GO:0005634|GO:0046872|GO:0030425|GO:0005829|GO:0035556|GO:0005737|GO:0046777|GO:0000166|GO:0016301|GO:0031397|GO:0019717|GO:0016772|GO:0042177|GO:0005624|GO:0005524|GO:0032425|GO:0016310|GO:0004672|GO:0004674|GO:0006468|GO:0004698|GO:0008270|GO:0004697|GO:0016740	NM_011102	Mm.7980
A_55_P2028904	A430107P09Rik	Mus musculus RIKEN cDNA A430107P09 gene (A430107P09Rik), mRNA [NM_001205242]	7.43563	down	-1.50551	1.38894	chr14	54286021	+	FALSE	mm|14qC2	100568452	NM_001205242	RIKEN cDNA A430107P09 gene	chr14:54286021-54286080	GO:0008150|GO:0003674|GO:0005575	NM_001205242	Mm.428738
A_51_P249313	Herc3	Mus musculus hect domain and RLD 3 (Herc3), mRNA [NM_028705]	17.5219	up	-3.51427	-7.64536	chr6	58870174	+	FALSE	mm|6qB3	73998	NM_028705	hect domain and RLD 3	chr6:58870174-58870233	GO:0004842|GO:0042787|GO:0005575	NM_028705	Mm.191892
A_52_P89305	Frmd5	Mus musculus FERM domain containing 5 (Frmd5), mRNA [NM_172673]	18.7882	down	-4.09212	0.139641	chr2	121383623	-	FALSE	mm|2qE5	228564	NM_172673	FERM domain containing 5	chr2:121388679-121383623	GO:0008092|GO:0008150|GO:0003674|GO:0005737|GO:0005488|GO:0005575|GO:0005856|GO:0019898	NM_172673	Mm.121514
A_55_P2072771	Cd3g	Mus musculus CD3 antigen, gamma polypeptide (Cd3g), mRNA [NM_009850]	29.0856	up	-2.72627	-7.58851	chr9	44777868	-	FALSE	mm|9qA5.2	12502	NM_009850	CD3 antigen, gamma polypeptide	chr9:44777927-44777868	GO:0005515|GO:0042105|GO:0007163|GO:0046982|GO:0016020|GO:0005886|GO:0042981|GO:0004872|GO:0016021|GO:0015031|GO:0007166|GO:0004888	NM_009850	Mm.335106
A_55_P2048119	Slc29a4	Mus musculus solute carrier family 29 (nucleoside transporters), member 4 (Slc29a4), mRNA [NM_146257]	13.4038	up	-1.62249	-5.36707	chr5	143198384	+	FALSE	mm|5qG2	243328	NM_146257	solute carrier family 29 (nucleoside transporters), member 4	chr5:143198384-143198443	GO:0016020|GO:0005886|GO:0005337|GO:0006810|GO:0016021	NM_146257	Mm.125942
A_55_P1952618	Ear2	Mus musculus eosinophil-associated, ribonuclease A family, member 2 (Ear2), mRNA [NM_007895]	13.7063	up	-3.85513	-7.6319	chr14	44681119	+	FALSE	mm|14qC1	13587	NM_007895	eosinophil-associated, ribonuclease A family, member 2	chr14:44681119-44681178	GO:0003674|GO:0004518|GO:0004519|GO:0016787|GO:0006935|GO:0008152|GO:0004522|GO:0005575|GO:0003676	NM_007895	Mm.327386
A_55_P2035424	Hpgd	Mus musculus hydroxyprostaglandin dehydrogenase 15 (NAD) (Hpgd), mRNA [NM_008278]	6.34544	up	-3.23441	-5.90013	chr8	58798941	+	FALSE	mm|8qB2	15446	NM_008278	hydroxyprostaglandin dehydrogenase 15 (NAD)	chr8:58798941-58799000	GO:0006629|GO:0007565|GO:0006693|GO:0007567|GO:0070403|GO:0005634|GO:0045786|GO:0003824|GO:0004957|GO:0005737|GO:0051287|GO:0005488|GO:0008152|GO:0016491|GO:0006631|GO:0007179|GO:0055114|GO:0016404	NM_008278	Mm.18832
A_55_P2040838	Gm14548	Mus musculus predicted gene 14548 (Gm14548), mRNA [NM_001166672]	21.5218	up	2.43667	-1.99106	chr7	3835814	-	FALSE	mm|7qA1	100038909	NM_001166672	predicted gene 14548	chr7:3835872-3835814	GO:0008150|GO:0003674|GO:0005575	NM_001166672	Mm.3189
A_55_P1977473	Dab2	Mus musculus disabled homolog 2 (Drosophila) (Dab2), transcript variant 1, mRNA [NM_023118]	14.0221	up	-0.720639	-4.53027	chr15	6390616	+	FALSE	mm|15qA1	13132	NM_023118	disabled homolog 2 (Drosophila)	chr15:6390616-6390675	GO:0032091|GO:0005515|GO:0007588|GO:0030308|GO:0006907|GO:0005886|GO:2000096|GO:0032436|GO:0005634|GO:0031410|GO:0008022|GO:0001701|GO:0006898|GO:0016324|GO:0005737|GO:0005905|GO:0000904|GO:0016020|GO:0001934|GO:0045893|GO:0090090|GO:0045892	NM_023118	Mm.240830
A_55_P2181738	Lyz1	Mus musculus lysozyme 1 (Lyz1), mRNA [NM_013590]	95.4045	up	2.98647	-3.58951	chr10	116724862	-	FALSE	mm|10qD2	17110	NM_013590	lysozyme 1	chr10:116724921-116724862	GO:0050829|GO:0016787|GO:0050830|GO:0016998|GO:0016798|GO:0019835|GO:0008152|GO:0003796|GO:0005576|GO:0003824|GO:0042742	NM_013590	Mm.177539
A_55_P2014124	Gjb3	Mus musculus gap junction protein, beta 3 (Gjb3), transcript variant 1, mRNA [NM_001160012]	10.0763	up	-0.933921	-4.26681	chr4	127002483	-	FALSE	mm|4qD2.2	14620	NM_001160012	gap junction protein, beta 3	chr4:127002542-127002483	GO:0005515|GO:0030054|GO:0007154|GO:0016020|GO:0005886|GO:0007605|GO:0005921|GO:0005922|GO:0016021|GO:0001890	NM_001160012	Mm.90003
A_51_P304478	Fam155a	Mus musculus family with sequence similarity 155, member A (Fam155a), mRNA [NM_173446]	15.5427	up	-3.57638	-7.53454	chr8	9206067	-	FALSE	mm|8qA1.1	270028	NM_173446	family with sequence similarity 155, member A	chr8:9206126-9206067	GO:0008150|GO:0003674|GO:0016020|GO:0005488|GO:0016021|GO:0005575	NM_173446	Mm.268163
A_66_P135651	Capn9	Mus musculus calpain 9 (Capn9), mRNA [NM_023709]	32.3711	down	-6.72348	-1.70685	chr8	127142567	+	FALSE	mm|8qE2	73647	NM_023709	calpain 9	chr8:127142567-127142626	GO:0005622|GO:0004197|GO:0005737|GO:0004198|GO:0016787|GO:0005509|GO:0006508|GO:0008233|GO:0008234	NM_023709	Mm.6209
A_51_P170178	B3gnt8	Mus musculus UDP-GlcNAc:betaGal beta-1,3-N-acetylglucosaminyltransferase 8 (B3gnt8), transcript variant 1, mRNA [NM_146184]	8.01901	up	-1.90066	-4.90409	chr7	26414013	+	FALSE	mm|7qA3	232984	NM_146184	UDP-GlcNAc:betaGal beta-1,3-N-acetylglucosaminyltransferase 8	chr7:26414013-26414072	GO:0005794|GO:0016020|GO:0030311|GO:0016757|GO:0016262|GO:0006486|GO:0016021|GO:0005575|GO:0008378|GO:0016740	NM_146184	Mm.192369
A_52_P244702	Tcf7	Mus musculus transcription factor 7, T-cell specific (Tcf7), mRNA [NM_009331]	26.7561	up	-2.89458	-7.63638	chr11	52066114	-	FALSE	mm|11qB1.3	21414	NM_009331	transcription factor 7, T-cell specific	chr11:52066173-52066114	GO:0006355|GO:0003700|GO:0044212|GO:0033153|GO:0046632|GO:0005634|GO:0042981|GO:0003677|GO:0006351|GO:0048557|GO:0048619|GO:0030538|GO:0042127|GO:0021915|GO:0071353|GO:0016055	NM_009331	Mm.31630
A_55_P1972872	I830012O16Rik	Mus musculus RIKEN cDNA I830012O16 gene (I830012O16Rik), mRNA [NM_001005858]	7.27996	up	-3.0122	-5.87613	chr19	34687522	+	FALSE	mm|19qC1	667370	NM_001005858	RIKEN cDNA I830012O16 gene	chr19:34687522-34687581	GO:0008150|GO:0003674|GO:0005575	NM_001005858	Mm.271850
A_55_P1972772	Gsg1	Mus musculus germ cell-specific gene 1 (Gsg1), transcript variant 3, mRNA [NM_010352]	10.0297	up	-0.318741	-3.64495	chr6	135187350	-	FALSE	mm|6qG1	14840	NM_010352	germ cell-specific gene 1	chr6:135187409-135187350	GO:0008150|GO:0016020|GO:0005783|GO:0016021|GO:0070063	NM_010352	Mm.272306
A_55_P2039315	Zfp345	Mus musculus zinc finger protein 345 (Zfp345), mRNA [NM_001034900]	13.7006	down	-6.59569	-2.81952	chr2	150296797	-	FALSE	mm|2qG3	545471	NM_001034900	zinc finger protein 345	chr2:150296856-150296797	GO:0008150|GO:0003674|GO:0005575|GO:0046872	NM_001034900	Mm.451002
A_55_P2040805	Cd209c	Mus musculus CD209c antigen (Cd209c), mRNA [NM_130903]	8.73037	up	-4.45257	-7.57861	chr8	3940223	-	FALSE	mm|8qA1.1	170776	NM_130903	CD209c antigen	chr8:3940282-3940223	GO:0008150|GO:0005488|GO:0005529|GO:0004872|GO:0005575|GO:0005537|GO:0046872	NM_130903	Mm.215729
A_55_P2061909	Wbp5	Mus musculus WW domain binding protein 5 (Wbp5), mRNA [NM_011712]	6.87466	up	0.601624	-2.17966	chrX	132781608	+	FALSE	mm|XqF1	22381	NM_011712	WW domain binding protein 5	chrX:132781608-132781667	GO:0008150|GO:0050699|GO:0005575	NM_011712	Mm.512
A_52_P700056	Gm11428	Mus musculus predicted gene 11428 (Gm11428), mRNA [NM_001081957]	40.9235	up	2.10425	-3.25061	chr11	83518443	+	FALSE	mm|11qC	100034251	NM_001081957	predicted gene 11428	chr11:83518443-83519627	GO:0008150|GO:0003674|GO:0005575	NM_001081957	Mm.24097
A_51_P405167	Maf	Mus musculus avian musculoaponeurotic fibrosarcoma (v-maf) AS42 oncogene homolog (Maf), mRNA [NM_001025577]	34.9919	up	-2.4286	-7.55755	chr8	118227736	-	FALSE	mm|8qE1	17132	NM_001025577	avian musculoaponeurotic fibrosarcoma (v-maf) AS42 oncogene homolog	chr8:118227795-118227736	GO:0005515|GO:0006355|GO:0003700|GO:0070306|GO:0046982|GO:0005634|GO:0032330|GO:0001816|GO:0003677|GO:0006351|GO:0042803|GO:0043565|GO:0005737|GO:0003690|GO:0002088|GO:0045944|GO:0048468	NM_001025577	Mm.439772
A_55_P2135064	H2-M2	Mus musculus histocompatibility 2, M region locus 2 (H2-M2), mRNA [NM_008204]	14.1031	up	-3.16057	-6.97851	chr17	37618042	-	FALSE	mm|17qB1	14990	NM_008204	histocompatibility 2, M region locus 2	chr17:37618101-37618042	GO:0008150|GO:0003674|GO:0009986|GO:0016021	NM_008204	Mm.329041
A_55_P2158102	Camp	Mus musculus cathelicidin antimicrobial peptide (Camp), mRNA [NM_009921]	9.00118	up	-1.51365	-4.68377	chr9	109749901	-	FALSE	mm|9qF2	12796	NM_009921	cathelicidin antimicrobial peptide	chr9:109749950-109749901	GO:0051873|GO:0008284|GO:0050830|GO:0042581|GO:0005576|GO:0006952|GO:0042995|GO:0005615|GO:0045766|GO:0050829|GO:0005737|GO:0001934|GO:0044130|GO:0044140|GO:0042742	NM_009921	Mm.3834
A_55_P2026685		T cell receptor alpha variable 3-4 [Source:MGI Symbol;Acc:MGI:2684925] [ENSMUST00000103670]	11.0377	down	-3.94606	-0.481698	chr14	54397090	+	FALSE	mm|14qC2		AK043253		chr14:54397090-54397149			Mm.371905
A_51_P282557	C3ar1	Mus musculus complement component 3a receptor 1 (C3ar1), mRNA [NM_009779]	13.0653	up	-2.40167	-6.10934	chr6	122798222	-	FALSE	mm|6qF2	12267	NM_009779	complement component 3a receptor 1	chr6:122798281-122798222	GO:0002462|GO:0030335|GO:0005886|GO:0004930|GO:0004943|GO:0004942|GO:0010575|GO:0007204|GO:0045766|GO:0001850|GO:0007165|GO:0016020|GO:0006935|GO:0007186|GO:0090023|GO:0010759|GO:0008217|GO:0004872|GO:0016021|GO:0004871|GO:0002430	NM_009779	Mm.2408
A_52_P415155	Wnt6	Mus musculus wingless-related MMTV integration site 6 (Wnt6), mRNA [NM_009526]	25.1536	up	-2.95509	-7.60779	chr1	74831461	+	FALSE	mm|1qC3	22420	NM_009526	wingless-related MMTV integration site 6	chr1:74831461-74831520	GO:0005515|GO:0001658|GO:0009798|GO:0005886|GO:0070172|GO:0007267|GO:0072079|GO:0009952|GO:0005615|GO:0072080|GO:0009887|GO:0042475|GO:0016055|GO:0060070|GO:0060684|GO:0001664|GO:0009986|GO:0005578|GO:0005102|GO:0007275|GO:0005576|GO:0000122|GO:0010628|GO:0031012|GO:0007165|GO:0045893	NM_009526	Mm.268282
A_55_P2008889	Tmsb15b2	Mus musculus thymosin beta 15b2 (Tmsb15b2), mRNA [NM_001080967]	8.67162	up	-2.65512	-5.77142	chrX	133489816	-	FALSE	mm|XqF1	100034363	NM_001080967	thymosin beta 15b2	chrX:133489875-133489816	GO:0051497|GO:0003785|GO:0042989|GO:0001725|GO:0031941|GO:0030837	NM_001080967	Mm.381904
A_52_P336958	9430020K01Rik	Mus musculus RIKEN cDNA 9430020K01 gene (9430020K01Rik), mRNA [NM_001081963]	5.56226	up	-2.99227	-5.46794	chr18	4682760	+	FALSE	mm|18qA1	240185	NM_001081963	RIKEN cDNA 9430020K01 gene	chr18:4682760-4682819	GO:0008150|GO:0003674|GO:0005575	NM_001081963	Mm.33179
A_51_P262515	Phf11	Mus musculus PHD finger protein 11 (Phf11), mRNA [NM_172603]	9.08609	up	-2.5032	-5.68686	chr14	59895771	-	FALSE	mm|14qC3	219131	NM_172603	PHD finger protein 11	chr14:59895830-59895771	GO:0008150|GO:0003674|GO:0005634|GO:0005575|GO:0046872	NM_172603	Mm.254918
A_55_P1959393	Hhat	Mus musculus hedgehog acyltransferase (Hhat), mRNA [NM_144881]	6.10044	up	-3.14268	-5.75159	chr1	194336802	-	FALSE	mm|1qH6	226861	NM_144881	hedgehog acyltransferase	chr1:194336861-194336802	GO:0018345|GO:0016020|GO:0000166|GO:0005783|GO:0016409|GO:0007275|GO:0016021|GO:0005525|GO:0016740|GO:0008415|GO:0007224	NM_144881	Mm.145857
A_55_P1994309	Ptgir	Mus musculus prostaglandin I receptor (IP) (Ptgir), mRNA [NM_008967]	11.5983	up	-1.89165	-5.42749	chr7	17496120	+	FALSE	mm|7qA2	19222	NM_008967	prostaglandin I receptor (IP)	chr7:17496120-17496179	GO:0005085|GO:0007165|GO:0016020|GO:0007186|GO:0005886|GO:0004930|GO:0004872|GO:0016021|GO:0004871	NM_008967	Mm.287572
A_55_P2183208	Prl2c1	Mus musculus Prolactin family 2, subfamily c, member 1 (Prl2c1), mRNA [NM_001045532]	6.5881	up	-3.38497	-6.10483	chr13	27948312	+	FALSE	mm|13qA3.1	666317	NM_001045532	Prolactin family 2, subfamily c, member 1	chr13:27948312-27948371	GO:0008150|GO:0003674|GO:0005179|GO:0005575	NM_001045532	Mm.432060
A_55_P2083411	Cyp4f18	Mus musculus cytochrome P450, family 4, subfamily f, polypeptide 18 (Cyp4f18), mRNA [NM_024444]	5.71647	up	-0.399748	-2.91487	chr8	74512381	-	FALSE	mm|8qB3.3	72054	NM_024444	cytochrome P450, family 4, subfamily f, polypeptide 18	chr8:74512440-74512381	GO:0005792|GO:0005506|GO:0005783|GO:0050051|GO:0009055|GO:0046872|GO:0004497|GO:0016020|GO:0019825|GO:0005789|GO:0016491|GO:0016021|GO:0016705|GO:0055114|GO:0020037	NM_024444	Mm.160020
A_55_P2011877	Eif2s3y	Mus musculus eukaryotic translation initiation factor 2, subunit 3, structural gene Y-linked (Eif2s3y), mRNA [NM_012011]	295.821	up	0.646658	-7.56192	chrY	364951	+	FALSE	mm|YqA1	26908	NM_012011	eukaryotic translation initiation factor 2, subunit 3, structural gene Y-linked	chrY:364951-365010	GO:0000166|GO:0003924|GO:0003743|GO:0005525|GO:0006412|GO:0006413	NM_012011	Mm.250909
A_52_P452689	Atf3	Mus musculus activating transcription factor 3 (Atf3), mRNA [NM_007498]	85.9441	up	0.961083	-5.46424	chr1	192994547	-	FALSE	mm|1qH6	11910	NM_007498	activating transcription factor 3	chr1:192994606-192994547	GO:0043565|GO:0008284|GO:0006355|GO:0003700|GO:0046983|GO:0006094|GO:0005730|GO:0005634|GO:0045892|GO:0003677|GO:0006351|GO:0042802	NM_007498	Mm.2706
A_55_P1989663	Slco3a1	Mus musculus solute carrier organic anion transporter family, member 3a1 (Slco3a1), transcript variant 1, mRNA [NM_023908]	8.28505	up	-2.78902	-5.83953	chr7	81426878	-	FALSE	mm|7qD2	108116	NM_023908	solute carrier organic anion transporter family, member 3a1	chr7:81426937-81426878	GO:0005215|GO:0005886|GO:0009986|GO:0015347|GO:0043252|GO:0016324|GO:0034220|GO:0009925|GO:0016020|GO:0006857|GO:0015732|GO:0005887|GO:0006810|GO:0015711|GO:0008514|GO:0016021|GO:0006811|GO:0015198	NM_023908	Mm.425467
A_55_P2138183	Psd3	Mus musculus pleckstrin and Sec7 domain containing 3 (Psd3), transcript variant 2, mRNA [NM_177698]	6.45932	down	-6.1162	-3.42481	chr8	70219946	-	FALSE	mm|8qB3.3	234353	NM_177698	pleckstrin and Sec7 domain containing 3	chr8:70220005-70219946	GO:0030054|GO:0005886|GO:0005624|GO:0045202|GO:0005085|GO:0005622|GO:0005086|GO:0005737|GO:0050790|GO:0016020|GO:0045211|GO:0032012|GO:0032011	NM_177698	Mm.32525
A_55_P1954648	Siglec1	Mus musculus sialic acid binding Ig-like lectin 1, sialoadhesin (Siglec1), mRNA [NM_011426]	5.68378	up	-4.95805	-7.4649	chr2	130895093	-	FALSE	mm|2qF1	20612	NM_011426	sialic acid binding Ig-like lectin 1, sialoadhesin	chr2:130895152-130895093	GO:0005515|GO:0016020|GO:0005886|GO:0005529|GO:0005576|GO:0016021|GO:0007155|GO:0006897	NM_011426	Mm.1374
A_51_P463120	Ptplad2	Mus musculus protein tyrosine phosphatase-like A domain containing 2 (Ptplad2), mRNA [NM_025760]	16.0808	up	-1.97009	-5.97736	chr4	88065670	-	FALSE	mm|4qC4	66775	NM_025760	protein tyrosine phosphatase-like A domain containing 2	chr4:88068895-88065670	GO:0008150|GO:0003674|GO:0008610|GO:0016020|GO:0005783|GO:0006633|GO:0016021|GO:0005575|GO:0016829	NM_025760	Mm.386788
A_52_P257812	Lpl	Mus musculus lipoprotein lipase (Lpl), mRNA [NM_008509]	5.3667	up	-0.852344	-3.27638	chr8	71425050	+	FALSE	mm|8qB3.3	16956	NM_008509	lipoprotein lipase	chr8:71425050-71425109	GO:0006629|GO:0005515|GO:0004806|GO:0005886|GO:0042627|GO:0070328|GO:0031225|GO:0003824|GO:0005615|GO:0034361|GO:0019432|GO:0006633|GO:0019433|GO:0008201|GO:0010744|GO:0005102|GO:0005576|GO:0010886|GO:0004465|GO:0016042|GO:0031012|GO:0034372|GO:0016020|GO:0016787|GO:0010890|GO:0017129	NM_008509	Mm.1514
A_52_P647740	Kbtbd10	Mus musculus kelch repeat and BTB (POZ) domain containing 10 (Kbtbd10), mRNA [NM_001081087]	12.3445	down	-7.43867	-3.81288	chr2	69512730	+	FALSE	mm|2qC2	228003	NM_001081087	kelch repeat and BTB (POZ) domain containing 10	chr2:69512730-69516138	GO:0003674|GO:0005813|GO:0005737|GO:0005886|GO:0031275|GO:0005730|GO:0005634|GO:0031143	NM_001081087	Mm.178784
A_55_P2137932	B830012L14Rik	PREDICTED: Mus musculus RIKEN cDNA B830012L14 gene (B830012L14Rik), partial miscRNA [XR_106478]	8.93183	down	-4.7293	-1.57034	chr12	110934160	+	FALSE	mm|12qF1	320085	XR_106478	RIKEN cDNA B830012L14 gene	chr12:110934160-110934219	GO:0008150|GO:0003674|GO:0005575	XR_106478	Mm.136993
A_52_P1020860	AW112010	Mus musculus expressed sequence AW112010 (AW112010), mRNA [NM_001177351]	23.5903	up	-2.99784	-7.55796	chr19	11122349	-	FALSE	mm|19qA	107350	NM_001177351	expressed sequence AW112010	chr19:11122408-11122349	GO:0008150|GO:0003674|GO:0005575	NM_001177351	Mm.6381
A_55_P2143923	Slc13a2	Mus musculus solute carrier family 13 (sodium-dependent dicarboxylate transporter), member 2 (Slc13a2), mRNA [NM_022411]	6.73202	down	-6.80205	-4.05101	chr11	78210807	-	FALSE	mm|11qB5	20500	NM_022411	solute carrier family 13 (sodium-dependent dicarboxylate transporter), member 2	chr11:78210866-78210807	GO:0005215|GO:0016020|GO:0005886|GO:0006810|GO:0016021|GO:0006814|GO:0055085|GO:0015361|GO:0015293|GO:0006811	NM_022411	Mm.274058
A_55_P2152956	Plekhm3	Mus musculus pleckstrin homology domain containing, family M, member 3 (Plekhm3), mRNA [NM_001039493]	6.73975	up	-2.20888	-4.96157	chr1	64835695	-	FALSE	mm|1qC2	241075	NM_001039493	pleckstrin homology domain containing, family M, member 3	chr1:64835754-64835695	GO:0035556|GO:0008150|GO:0003674|GO:0005575|GO:0046872	NM_001039493	Mm.239534
A_51_P395555	Vkorc1	Mus musculus vitamin K epoxide reductase complex, subunit 1 (Vkorc1), mRNA [NM_178600]	6.40683	up	1.0347	-1.64492	chr7	135036605	-	FALSE	mm|7qF3	27973	NM_178600	vitamin K epoxide reductase complex, subunit 1	chr7:135036664-135036605	GO:0005792|GO:0014070|GO:0005783|GO:0010243|GO:0050820|GO:0016020|GO:0030193|GO:0016491|GO:0016021|GO:0042371|GO:0047057|GO:0042373|GO:0046677|GO:0055114|GO:0047058	NM_178600	Mm.29703
A_55_P2115166	AI661453	Mus musculus expressed sequence AI661453 (AI661453), mRNA [NM_145489]	8.72303	up	-2.04264	-5.16747	chr17	47607033	+	FALSE	mm|17qC	224833	NM_145489	expressed sequence AI661453	chr17:47607033-47607092	GO:0008150|GO:0003674|GO:0005575	NM_145489	Mm.218444
A_55_P2069217	Prr13	Mus musculus proline rich 13 (Prr13), transcript variant 1, mRNA [NM_025385]	5.98205	up	-3.12421	-5.70485	chr15	102291090	+	FALSE	mm|15qF3	66151	NM_025385	proline rich 13	chr15:102291090-102291149	GO:0008150|GO:0003674|GO:0006355|GO:0005634|GO:0005575|GO:0006351	NM_025385	Mm.393955
A_51_P408363	Cfp	Mus musculus complement factor properdin (Cfp), mRNA [NM_008823]	5.18938	up	3.2529	0.877343	chrX	20502742	-	FALSE	mm|XqA1.3	18636	NM_008823	complement factor properdin	chrX:20502801-20502742	GO:0006957|GO:0045087|GO:0005576	NM_008823	Mm.3064
A_55_P2114863	Mgll	Mus musculus monoglyceride lipase (Mgll), transcript variant 1, mRNA [NM_001166251]	6.77366	up	-4.78637	-7.54631	chr6	88775976	+	FALSE	mm|6qD1	23945	NM_001166251	monoglyceride lipase	chr6:88775976-88776035	GO:0004091|GO:0006629|GO:0019369|GO:0008610|GO:0050727|GO:0045202|GO:0060292|GO:0009966|GO:2000124|GO:0042803|GO:0008289|GO:0016042|GO:0016787|GO:0047372|GO:0006633|GO:0046464|GO:0051930	NM_001166251	Mm.272197
A_55_P2004861	Rgs8	Mus musculus regulator of G-protein signaling 8 (Rgs8), mRNA [NM_026380]	6.71636	up	-4.6654	-7.41307	chr1	155544738	+	FALSE	mm|1qG3	67792	NM_026380	regulator of G-protein signaling 8	chr1:155544738-155544795	GO:0005737|GO:0007186|GO:0005886|GO:0009968|GO:0004871|GO:0005096	NM_026380	Mm.379143
A_55_P2064351	Vipr1	Mus musculus vasoactive intestinal peptide receptor 1 (Vipr1), mRNA [NM_011703]	9.58585	up	0.0883012	-3.17261	chr9	121581964	+	FALSE	mm|9qF4	22354	NM_011703	vasoactive intestinal peptide receptor 1	chr9:121581964-121582023	GO:0007165|GO:0016020|GO:0007186|GO:0005886|GO:0004999|GO:0004930|GO:0004872|GO:0016021|GO:0004871|GO:0007166|GO:0004888	NM_011703	Mm.282007
A_55_P2011286	Hopx	Mus musculus HOP homeobox (Hopx), transcript variant 1, mRNA [NM_175606]	18.2774	up	-3.38105	-7.57304	chr5	77516624	-	FALSE	mm|5qC3.3	74318	NM_175606	HOP homeobox	chr5:77516683-77516624	GO:0005515|GO:0006355|GO:0016575|GO:0003700|GO:0048286|GO:0008016|GO:0005634|GO:0007275|GO:0000122|GO:0001829|GO:0003677|GO:0006351|GO:0043565|GO:0007507|GO:0005737|GO:0043415|GO:0051155|GO:0045596	NM_175606	Mm.181852
A_55_P2119772	Scn3a	Mus musculus sodium channel, voltage-gated, type III, alpha (Scn3a), mRNA [NM_018732]	9.17918	up	-0.778702	-3.97707	chr2	65296320	-	FALSE	mm|2qC1.3	20269	NM_018732	sodium channel, voltage-gated, type III, alpha	chr2:65296379-65296320	GO:0030424|GO:0005516|GO:0046684|GO:0005244|GO:0005272|GO:0005248|GO:0005624|GO:0031402|GO:0019233|GO:0019228|GO:0005737|GO:0043025|GO:0006810|GO:0035725|GO:0034765|GO:0001518|GO:0016021|GO:0006814|GO:0005216|GO:0071236|GO:0006811	NM_018732	Mm.330256
A_55_P2051094	Rorc	Mus musculus RAR-related orphan receptor gamma (Rorc), mRNA [NM_011281]	6.79358	up	-2.90422	-5.66839	chr3	94201511	+	FALSE	mm|3qF2.1	19885	NM_011281	RAR-related orphan receptor gamma	chr3:94201511-94201570	GO:0033077|GO:0006355|GO:0003700|GO:0046632|GO:0003707|GO:0005634|GO:0007275|GO:0048537|GO:0003677|GO:0046872|GO:0006351|GO:0030154|GO:0048535|GO:0043565|GO:0043401|GO:0004872|GO:0006468|GO:0008270|GO:0004879|GO:0030522	NM_011281	Mm.4372
A_52_P367760	Calml4	Mus musculus calmodulin-like 4 (Calml4), transcript variant 1, mRNA [NM_138304]	7.10389	down	-7.21314	-4.38453	chr9	62719231	+	FALSE	mm|9qB	75600	NM_138304	calmodulin-like 4	chr9:62719231-62723312	GO:0005509	NM_138304	Mm.440576
A_52_P467389	Slc15a3	Mus musculus solute carrier family 15, member 3 (Slc15a3), mRNA [NM_023044]	38.6062	up	-1.13972	-6.41049	chr19	10931798	+	FALSE	mm|19qA	65221	NM_023044	solute carrier family 15, member 3	chr19:10931798-10932148	GO:0005215|GO:0015833|GO:0016020|GO:0006857|GO:0006810|GO:0016021|GO:0015031|GO:0005765|GO:0015333|GO:0005764|GO:0015293	NM_023044	Mm.485161
A_55_P2156731	H2-Eb1	Mus musculus histocompatibility 2, class II antigen E beta (H2-Eb1), mRNA [NM_010382]	205.655	up	2.85004	-4.83405	chr17	34453075	+	FALSE	mm|17qB1	14969	NM_010382	histocompatibility 2, class II antigen E beta	chr17:34453075-34453134	GO:0005515|GO:0019886|GO:0016020|GO:0005886|GO:0002504|GO:0031902|GO:0042613|GO:0016021|GO:0005765	NM_010382	Mm.22564
A_55_P1990840	LOC100041550	Mus musculus hypothetical protein LOC100041550 (LOC100041550), mRNA [NM_001199332]	5.34744	up	-3.99886	-6.41771	chrY_random	8781560	-	FALSE		100041550	NM_001199332	hypothetical protein LOC100041550	chrY_random:8781618-8781560		NM_001199332	Mm.485768
A_66_P121137	Idi2	Mus musculus isopentenyl-diphosphate delta isomerase 2 (Idi2), mRNA [NM_177197]	7.08586	down	-5.74048	-2.91554	chr13	8959955	+	FALSE	mm|13qA1	320581	NM_177197	isopentenyl-diphosphate delta isomerase 2	chr13:8959955-8960014	GO:0008150|GO:0003674|GO:0005829	NM_177197	Mm.313743
A_51_P321150	Lyz2	Mus musculus lysozyme 2 (Lyz2), mRNA [NM_017372]	151.722	up	1.2075	-6.03779	chr10	116719175	-	FALSE	mm|10qD2	17105	NM_017372	lysozyme 2	chr10:116719234-116719175	GO:0048237|GO:0005795|GO:0050830|GO:0003796|GO:0005576|GO:0005625|GO:0003824|GO:0050829|GO:0005902|GO:0000137|GO:0005737|GO:0016787|GO:0016798|GO:0016998|GO:0019835|GO:0008152|GO:0005788|GO:0030141|GO:0030140|GO:0042742	NM_017372	Mm.45436
A_55_P2023391	Grhl3	Mus musculus grainyhead-like 3 (Drosophila) (Grhl3), mRNA [NM_001013756]	8.0645	up	-2.39535	-5.40694	chr4	135097991	-	FALSE	mm|4qD3	230824	NM_001013756	grainyhead-like 3 (Drosophila)	chr4:135098050-135097991	GO:0001736|GO:0005515|GO:0007389|GO:0006355|GO:0000981|GO:0090179|GO:0005634|GO:0007398|GO:0007417|GO:0003677|GO:0006351|GO:0010628|GO:0008544|GO:0032321|GO:0045944|GO:0032956|GO:0042060|GO:0090103|GO:0045893	NM_001013756	Mm.331972
A_55_P1961943	Cd68	CD68 antigen [Source:MGI Symbol;Acc:MGI:88342] [ENSMUST00000018918]	6.30046	up	1.63943	-1.01602	chr11	69477775	-	FALSE	mm|11qB3	12514	AK170443	CD68 antigen	chr11:69477834-69477775	GO:0016020|GO:0005886|GO:0016021|GO:0005764|GO:0005768		Mm.15819
A_55_P1960148		PREDICTED: Mus musculus immunoglobulin heavy chain (J558 family) (Igh-VJ558), mRNA [XM_001472091]	16.907	up	-1.22825	-5.30779	chr12	114497090	-	FALSE	mm|12qF1		XM_001472091		chr12:114497149-114497090		XM_001472091	Mm.458003

## Sheet: FC10
Fold change cut off<=10
458 probes (387 genes)			Fold change
			Pro-B(-)/Pro-B(+)		Normalized signal
ProbeName	GeneSymbol	Description	FC (abs) (Pro-B(-)/Pro-B(+))	Regulation (Pro-B(-)/Pro-B(+))	Pro-B(+) (normalized)	Pro-B(-) (normalized)	Chromosome End Index_Avadis_	Chromosome Number_Avadis_	Chromosome Start Index_Avadis_	Chromosome Strand_Avadis_	ControlType	Cytoband	EntrezGeneID	GenbankAccession	GeneName	GenomicCoordinates	Go	RefSeqAccession	UniGeneID
A_51_P128876	Ifitm3	Mus musculus interferon induced transmembrane protein 3 (Ifitm3), mRNA [NM_025378]	43.5698	up	2.67449	-2.77077	148195650	chr7	148195591	-	FALSE	mm|7qF5	66141	NM_025378	interferon induced transmembrane protein 3	chr7:148195650-148195591	GO:0009607|GO:0008285|GO:0016020|GO:0005886|GO:0016023|GO:0016021	NM_025378	Mm.141021
A_55_P2110513	Lmo7	Mus musculus LIM domain only 7 (Lmo7), mRNA [NM_201529]	13.0343	down	-7.1847	-3.48046	102333209	chr14	102333150	+	FALSE	mm|14qE2.3	380928	NM_201529	LIM domain only 7	chr14:102333150-102333209	GO:0016337|GO:0016324|GO:0005913|GO:0042805|GO:0008022|GO:0046872	NM_201529	Mm.218981
A_55_P2011341			11.7163	up	0.881304	-2.66914	113884088	chr13	113884029	-	FALSE	mm|13qD2.2				chr13:113884088-113884029
A_51_P294555	Ifitm6	Mus musculus interferon induced transmembrane protein 6 (Ifitm6), mRNA [NM_001033632]	118.492	up	-0.43453	-7.32318	148201773	chr7	148201714	-	FALSE	mm|7qF5	213002	NM_001033632	interferon induced transmembrane protein 6	chr7:148201773-148201714	GO:0008150|GO:0003674|GO:0016021|GO:0005575	NM_001033632	Mm.276440
A_52_P682382	Scd1	Mus musculus stearoyl-Coenzyme A desaturase 1 (Scd1), mRNA [NM_009127]	55.959	up	-1.71309	-7.51939	44469446	chr19	44469387	-	FALSE	mm|19qC3	20249	NM_009127	stearoyl-Coenzyme A desaturase 1	chr19:44469446-44469387	GO:0006629|GO:0005792|GO:0008610|GO:0005506|GO:0050830|GO:0005783|GO:0004768|GO:0010873|GO:0050872|GO:0016020|GO:0050873|GO:0016491|GO:0006633|GO:0016021|GO:0034435|GO:0044130|GO:0016717|GO:0055114	NM_009127	Mm.267377
A_51_P403243	Ccdc116	Mus musculus coiled-coil domain containing 116 (Ccdc116), transcript variant 2, mRNA [NM_029779]	42.5232	up	-2.09391	-7.50408	17141203	chr16	17141144	-	FALSE	mm|16qA3	76872	NM_029779	coiled-coil domain containing 116	chr16:17141203-17141144	GO:0008150|GO:0003674|GO:0005575	NM_029779	Mm.475763
A_51_P291501	Ccno	Mus musculus cyclin O (Ccno), mRNA [NM_001081062]	26.4619	down	-4.09555	0.630296	113780869	chr13	113780810	+	FALSE	mm|13qD2.2	218630	NM_001081062	cyclin O	chr13:113780810-113780869	GO:0004844|GO:0007049|GO:0019901|GO:0006284|GO:0045008|GO:0051726|GO:0005654|GO:0005634|GO:0000079|GO:0051301	NM_001081062	Mm.25457
A_66_P108468	2610528A11Rik	Mus musculus RIKEN cDNA 2610528A11 gene (2610528A11Rik), mRNA [NM_001206684]	21.2573	up	-1.6113	-6.02119	37915426	chr14	37915367	-	FALSE	mm|14qB	70045	NM_001206684	RIKEN cDNA 2610528A11 gene	chr14:37915426-37915367	GO:0008150|GO:0003674|GO:0005575	NM_001206684	Mm.271619
A_55_P2046145	Gm10693	PREDICTED: Mus musculus predicted pseudogene 10693 (Gm10693), miscRNA [XR_032476]	12.3597	up	2.06345	-1.56413	3813627	chr7	3813568	-	FALSE	mm|7qA1	675749	XR_032476	predicted pseudogene 10693	chr7:3813627-3813568		XR_032476	Mm.441334
A_51_P510891	Afp	Mus musculus alpha fetoprotein (Afp), mRNA [NM_007423]	11.8795	up	-2.50113	-6.07152	90937840	chr5	90937781	+	FALSE	mm|5qE1	11576	NM_007423	alpha fetoprotein	chr5:90937781-90937840	GO:0019953|GO:0005737|GO:0004566|GO:0042448|GO:0006810|GO:0005576|GO:0001542|GO:0060395|GO:0005615|GO:0046872	NM_007423	Mm.358570
A_51_P509679		PREDICTED: Mus musculus immunoglobulin heavy chain (J558 family) (Igh-VJ558), mRNA [XM_003085465]	16.391	up	-0.182125	-4.21695	114497044	chr12	114496985	-	FALSE	mm|12qF1		XM_003085465		chr12:114497044-114496985		XM_003085465	Mm.458003
A_51_P120093	Snx10	Mus musculus sorting nexin 10 (Snx10), transcript variant 1, mRNA [NM_028035]	10.4368	up	0.547798	-2.83581	51540171	chr6	51540112	+	FALSE	mm|6qB3	71982	NM_028035	sorting nexin 10	chr6:51540112-51540171	GO:0005545|GO:0005737|GO:0007154|GO:0016020|GO:0031313|GO:0006810|GO:0007032|GO:0035091|GO:0015031|GO:0008289|GO:0005768	NM_028035	Mm.294166
A_51_P246653	Clec7a	Mus musculus C-type lectin domain family 7, member a (Clec7a), mRNA [NM_020008]	260.163	up	0.467972	-7.5553	129411798	chr6	129411739	-	FALSE	mm|6qF3	56644	NM_020008	C-type lectin domain family 7, member a	chr6:129411798-129411739	GO:0008037|GO:0005886|GO:0002238|GO:0001874|GO:0001872|GO:0001879|GO:0001878|GO:0046872|GO:0050766|GO:0002221|GO:0016337|GO:0006954|GO:0002752|GO:0004872|GO:0032760|GO:0005529|GO:0001846|GO:0006910|GO:0006911|GO:0016020|GO:0005488|GO:0045087|GO:0030247|GO:0016021|GO:0009897|GO:0008329	NM_020008	Mm.239516
A_52_P425092		predicted gene 10092 [Source:MGI Symbol;Acc:MGI:3642362] [ENSMUST00000077110]	29.9777	up	-2.6831	-7.58892	36137745	chr16	36136075	+	FALSE	mm|16qB3				chr16:36136075-36137745
A_51_P234956	Xcl1	Mus musculus chemokine (C motif) ligand 1 (Xcl1), mRNA [NM_008510]	34.1171	up	-1.82745	-6.91987	166862079	chr1	166862020	-	FALSE	mm|1qH2.2	16963	NM_008510	chemokine (C motif) ligand 1	chr1:166862079-166862020	GO:2000538|GO:0032733|GO:2000518|GO:0007267|GO:0071560|GO:2000412|GO:2000513|GO:0005615|GO:0043433|GO:0042803|GO:0071636|GO:0042104|GO:0006955|GO:0006935|GO:0071353|GO:0035744|GO:0035745|GO:0051281|GO:0032689|GO:0032703|GO:0035740|GO:0008009|GO:0051209|GO:0002426|GO:0010820|GO:0050727|GO:0005576|GO:0002725|GO:0042379|GO:0002726|GO:0009615|GO:0005125|GO:0071663|GO:0002690|GO:0002839|GO:0045089|GO:…	NM_008510	Mm.190
A_55_P2172852	Ptplad2	Mus musculus protein tyrosine phosphatase-like A domain containing 2 (Ptplad2), mRNA [NM_025760]	10.1302	up	-3.32672	-6.6673	88058895	chr4	88058836	-	FALSE	mm|4qC4	66775	NM_025760	protein tyrosine phosphatase-like A domain containing 2	chr4:88058895-88058836	GO:0008150|GO:0003674|GO:0008610|GO:0016020|GO:0005783|GO:0006633|GO:0016021|GO:0005575|GO:0016829	NM_025760	Mm.386788
A_52_P300376	Xist	Mus musculus inactive X specific transcripts (Xist), transcript variant 2, non-coding RNA [NR_001570]	332.676	down	-7.34965	1.02832	100662233	chrX	100662174	-	FALSE	mm|XqD	213742	NR_001570	inactive X specific transcripts	chrX:100662233-100662174	GO:0005694|GO:0009048	NR_001570	Mm.274770
A_51_P137336	Cdh1	Mus musculus cadherin 1 (Cdh1), mRNA [NM_009864]	16.0269	up	-3.45874	-7.46117	109193871	chr8	109193812	+	FALSE	mm|8qD3	12550	NM_009864	cadherin 1	chr8:109193812-109193871	GO:0005515|GO:0030054|GO:0008013|GO:0016342|GO:0042993|GO:2000008|GO:0016337|GO:0070830|GO:0051260|GO:0071285|GO:0022408|GO:0005794|GO:0009986|GO:0045295|GO:0019903|GO:0005509|GO:0019904|GO:0007416|GO:0001701|GO:0043281|GO:0033561|GO:0009898|GO:0045893|GO:0005925|GO:0019538|GO:0048471|GO:0042153|GO:0005886|GO:0060693|GO:0015629|GO:0032880|GO:0071681|GO:0016323|GO:0043296|GO:0005737|GO:0005913|GO:…	NM_009864	Mm.35605
A_55_P1995572	Meis1	Mus musculus Meis homeobox 1 (Meis1), transcript variant B, mRNA [NM_001193271]	53.789	up	1.39399	-4.35525	18780754	chr11	18780695	-	FALSE	mm|11qA3.1	17268	NM_001193271	Meis homeobox 1	chr11:18780754-18780695	GO:0030097|GO:0005515|GO:0005667|GO:0006355|GO:0003700|GO:0046982|GO:0006357|GO:0006366|GO:0003705|GO:0048514|GO:0060216|GO:0005634|GO:0007275|GO:0001525|GO:0003677|GO:0006351|GO:0043565|GO:0045665|GO:0002089	NM_001193271	Mm.356578
A_55_P1998943	Oas1a	Mus musculus 2'-5' oligoadenylate synthetase 1A (Oas1a), mRNA [NM_145211]	16.429	up	0.637115	-3.40106	121346794	chr5	121346735	-	FALSE	mm|5qF	246730	NM_145211	2'-5' oligoadenylate synthetase 1A	chr5:121346794-121346735	GO:0005515|GO:0003725|GO:0001730|GO:0008152|GO:0048525	NM_145211	Mm.14301
A_51_P100852	Fam26f	Mus musculus family with sequence similarity 26, member F (Fam26f), mRNA [NM_175449]	19.5306	up	-3.3368	-7.62447	33846270	chr10	33846211	-	FALSE	mm|10qB1	215900	NM_175449	family with sequence similarity 26, member F	chr10:33846270-33846211	GO:0008150|GO:0003674|GO:0016020|GO:0016021|GO:0005575	NM_175449	Mm.34479
A_55_P2067505	Slc16a3	Mus musculus solute carrier family 16 (monocarboxylic acid transporters), member 3 (Slc16a3), mRNA [NM_030696]	17.1542	up	-0.798267	-4.89875	120820089	chr11	120820030	+	FALSE	mm|11qE2	80879	NM_030696	solute carrier family 16 (monocarboxylic acid transporters), member 3	chr11:120820030-120820089	GO:0031965|GO:0016020|GO:0005886|GO:0015711|GO:0006810|GO:0015355|GO:0016021|GO:0015629|GO:0055085|GO:0015293	NM_030696	Mm.28632
A_51_P105380	2010005H15Rik	Mus musculus RIKEN cDNA 2010005H15 gene (2010005H15Rik), mRNA [NM_029733]	12.452	up	-2.453	-6.09131	36257511	chr16	36257452	+	FALSE	mm|16qB3	76770	NM_029733	RIKEN cDNA 2010005H15 gene	chr16:36257452-36257511	GO:0008150|GO:0003674|GO:0004869|GO:0010466|GO:0005575|GO:0030414	NM_029733	Mm.327617
A_55_P2054445	Cd84	Mus musculus CD84 antigen (Cd84), mRNA [NM_013489]	26.8442	up	-2.85759	-7.60413	173818732	chr1	173816502	+	FALSE	mm|1qH3	12523	NM_013489	CD84 antigen	chr1:173816502-173818732	GO:0016020|GO:0005886|GO:0004872|GO:0016021|GO:0007155	NM_013489	Mm.259115
A_51_P115817	Ralgps2	Mus musculus Ral GEF with PH domain and SH3 binding motif 2 (Ralgps2), transcript variant 2, mRNA [NM_023884]	10.4154	up	-4.46177	-7.84242	158739163	chr1	158739104	-	FALSE	mm|1qH1	78255	NM_023884	Ral GEF with PH domain and SH3 binding motif 2	chr1:158739163-158739104	GO:0005622|GO:0005085|GO:0008150|GO:0003674|GO:0005737|GO:0016020|GO:0005886|GO:0007264|GO:0005575	NM_023884	Mm.28376
A_51_P112734	Slc7a8	Mus musculus solute carrier family 7 (cationic amino acid transporter, y+ system), member 8 (Slc7a8), mRNA [NM_016972]	12.0108	up	-3.73837	-7.32463	55341196	chr14	55341137	-	FALSE	mm|14qC3	50934	NM_016972	solute carrier family 7 (cationic amino acid transporter, y+ system), member 8	chr14:55341196-55341137	GO:0019534|GO:0005886|GO:0015695|GO:0006865|GO:0005275|GO:0055085|GO:0003333|GO:0015101|GO:0005737|GO:0015171|GO:0016020|GO:0006810|GO:0016021|GO:0015179|GO:0015807	NM_016972	Mm.276831
A_51_P273538	Syce2	Mus musculus synaptonemal complex central element protein 2 (Syce2), transcript variant 2, mRNA [NM_027954]	16.7205	up	2.7289	-1.33464	87411192	chr8	87411133	+	FALSE	mm|8qC3	71846	NM_027954	synaptonemal complex central element protein 2	chr8:87411133-87411192	GO:0005515|GO:0007128|GO:0007049|GO:0007126|GO:0000795|GO:0005694|GO:0005634|GO:0000801|GO:0007130|GO:0051301	NM_027954	Mm.229128
A_55_P2134967	Uty	Mus musculus ubiquitously transcribed tetratricopeptide repeat gene, Y chromosome (Uty), mRNA [NM_009484]	23.3646	up	-2.97374	-7.51999	511231	chrY	511172	-	FALSE	mm|YqA1	22290	NM_009484	ubiquitously transcribed tetratricopeptide repeat gene, Y chromosome	chrY:511231-511172		NM_009484	Mm.20477
A_55_P1997696	Plbd1	Mus musculus phospholipase B domain containing 1 (Plbd1), mRNA [NM_025806]	56.341	up	-1.06494	-6.88105	136560678	chr6	136560619	-	FALSE	mm|6qG1	66857	NM_025806	phospholipase B domain containing 1	chr6:136560678-136560619	GO:0016042|GO:0008150|GO:0003674|GO:0016787|GO:0005576|GO:0005575	NM_025806	Mm.3311
A_51_P102911	Hoxa11	Mus musculus homeobox A11 (Hoxa11), mRNA [NM_010450]	15.4498	down	-2.57683	1.37268	52192166	chr6	52192107	-	FALSE	mm|6qB3	15396	NM_010450	homeobox A11	chr6:52192166-52192107	GO:0005515|GO:0001656|GO:0001658|GO:0003700|GO:0005634|GO:0009954|GO:0001759|GO:0009953|GO:0030326|GO:0009952|GO:0048589|GO:0032993|GO:0060351|GO:0032332|GO:0005667|GO:0006355|GO:0010720|GO:0007275|GO:0003677|GO:0006351|GO:0043565|GO:0043234|GO:0007501|GO:0001501|GO:0042733	NM_010450	Mm.26954
A_55_P2040485	Ms4a4a	PREDICTED: Mus musculus membrane-spanning 4-domains, subfamily A, member 4A (Ms4a4a), mRNA [XM_003086124]	23.2986	up	-2.69573	-7.2379	11467280	chr19	11467221	+	FALSE	mm|19qA	666907	XM_003086124	membrane-spanning 4-domains, subfamily A, member 4A	chr19:11467221-11467280	GO:0008150|GO:0003674|GO:0005575	XM_003086124	Mm.391204
A_51_P279552	Cav2	Mus musculus caveolin 2 (Cav2), mRNA [NM_016900]	11.5949	up	-3.15474	-6.69015	17238452	chr6	17238393	+	FALSE	mm|6qA2	12390	NM_016900	caveolin 2	chr6:17238393-17238452	GO:0051219|GO:0030133|GO:0048471|GO:0008285|GO:0005886|GO:0007268|GO:0005634|GO:0051259|GO:0006906|GO:0042803|GO:0070836|GO:0005829|GO:0005622|GO:0016050|GO:0005737|GO:0031748|GO:0000149|GO:0060161|GO:0002080|GO:0048278|GO:0005811|GO:0019905|GO:0005794|GO:0009986|GO:0048741|GO:0005624|GO:0006897|GO:0031234|GO:0043234|GO:0016020|GO:0005887|GO:0001937|GO:0005901|GO:0045121|GO:0007005|GO:0007029	NM_016900	Mm.396075
A_51_P316553	Kdr	Mus musculus kinase insert domain protein receptor (Kdr), mRNA [NM_010612]	36.025	up	-2.6623	-7.83322	76329368	chr5	76329309	-	FALSE	mm|5qC3.3	16542	NM_010612	kinase insert domain protein receptor	chr5:76329368-76329309	GO:0008360|GO:0042221|GO:0046777|GO:0000166|GO:0016301|GO:0043025|GO:0043129|GO:0045446|GO:0043526|GO:0001945|GO:0050679|GO:0030335|GO:0048286|GO:0014068|GO:0010595|GO:0016310|GO:0005178|GO:0045165|GO:0009897|GO:0048170|GO:0043005|GO:0008284|GO:0032008|GO:0005886|GO:0030324|GO:0051894|GO:0007204|GO:0071944|GO:0055074|GO:0050927|GO:0050850|GO:0005737|GO:0001541|GO:0019838|GO:0045909|GO:0004872|GO:…	NM_010612	Mm.285
A_55_P2175400	Zfp467	Mus musculus zinc finger protein 467 (Zfp467), transcript variant 1, mRNA [NM_020589]	16.4802	up	-1.28958	-5.33224	48386695	chr6	48386636	-	FALSE	mm|6qB2.3	68910	NM_020589	zinc finger protein 467	chr6:48386695-48386636	GO:0005622|GO:0005515|GO:0006355|GO:0008270|GO:0005634|GO:0003676|GO:0003677|GO:0046872|GO:0006351	NM_020589	Mm.2464
A_55_P2010152	Sell	Mus musculus selectin, lymphocyte (Sell), transcript variant 2, mRNA [NM_001164059]	51.669	up	-1.90217	-7.59339	166010799	chr1	166010740	+	FALSE	mm|1qH2.2	20343	NM_001164059	selectin, lymphocyte	chr1:166010740-166010799	GO:0005515|GO:0016020|GO:0005886|GO:0005488|GO:0005529|GO:0033198|GO:0016021|GO:0007155|GO:0002020|GO:0050839|GO:0009897	NM_001164059	Mm.1461
A_51_P105124	P2ry6	Mus musculus pyrimidinergic receptor P2Y, G-protein coupled, 6 (P2ry6), mRNA [NM_183168]	70.9624	up	-0.225665	-6.37465	108086208	chr7	108086149	-	FALSE	mm|7qE3	233571	NM_183168	pyrimidinergic receptor P2Y, G-protein coupled, 6	chr7:108086208-108086149	GO:0030321|GO:0005886|GO:0004930|GO:0014911|GO:0007165|GO:0016323|GO:0045029|GO:0016324|GO:0019103|GO:0007186|GO:0016020|GO:0045028|GO:0004872|GO:0035589|GO:0004871|GO:0016021	NM_183168	Mm.235193
A_52_P198435	Rasgrp3	Mus musculus RAS, guanyl releasing protein 3 (Rasgrp3), transcript variant 2, mRNA [NM_207246]	32.9687	up	-2.59568	-7.6387	75928369	chr17	75928310	+	FALSE	mm|17qE2	240168	NM_207246	RAS, guanyl releasing protein 3	chr17:75928310-75928369	GO:0048471|GO:0007265|GO:0032854|GO:0043087|GO:0046872|GO:0005085|GO:0005737|GO:0050790|GO:0046582|GO:0019900|GO:0017016|GO:0005088|GO:0032045	NM_207246	Mm.329203
A_55_P1965101	Xlr3b	Mus musculus X-linked lymphocyte-regulated 3B (Xlr3b), mRNA [NM_001081643]	16.5791	down	-2.10179	1.9495	70448146	chrX	70448087	+	FALSE	mm|XqA7.3	574437	NM_001081643	X-linked lymphocyte-regulated 3B	chrX:70448087-70448146	GO:0008150|GO:0003674|GO:0005575	NM_001081643	Mm.482923
A_55_P2144556	Flrt3	Mus musculus fibronectin leucine rich transmembrane protein 3 (Flrt3), transcript variant 1, mRNA [NM_001172160]	14.005	up	-1.03177	-4.83963	140485120	chr2	140485061	-	FALSE	mm|2qF3	71436	NM_001172160	fibronectin leucine rich transmembrane protein 3	chr2:140485120-140485061	GO:0016021	NM_001172160	Mm.426781
A_55_P2017710	Igsf9	Mus musculus immunoglobulin superfamily, member 9 (Igsf9), transcript variant 1, mRNA [NM_033608]	13.4496	up	-2.64819	-6.39768	174428970	chr1	174428911	+	FALSE	mm|1qH3	93842	NM_033608	immunoglobulin superfamily, member 9	chr1:174428911-174428970	GO:0030054|GO:0016020|GO:0005886|GO:0045202|GO:0007275|GO:0016021|GO:0030425|GO:0030154|GO:0016358|GO:0007399	NM_033608	Mm.214530
A_55_P2112302			14.3749	up	1.56461	-2.28087	54080232	chr17	54080173	-	FALSE	mm|17qC				chr17:054080232-054080173
A_52_P180373	Mpeg1	Mus musculus macrophage expressed gene 1 (Mpeg1), mRNA [NM_010821]	30.9053	up	-2.63752	-7.5873	12537756	chr19	12537697	+	FALSE	mm|19qA	17476	NM_010821	macrophage expressed gene 1	chr19:12537697-12537756	GO:0016020|GO:0016021	NM_010821	Mm.3999
A_51_P483617	0610040J01Rik	Mus musculus RIKEN cDNA 0610040J01 gene (0610040J01Rik), mRNA [NM_029554]	19.934	up	-3.22919	-7.54636	64290839	chr5	64290780	+	FALSE	mm|5qC3.1	76261	NM_029554	RIKEN cDNA 0610040J01 gene	chr5:64290780-64290839	GO:0008150|GO:0003674|GO:0005575	NM_029554	Mm.38143
A_55_P2162910	Rtn1	Mus musculus reticulon 1 (Rtn1), transcript variant 1, mRNA [NM_153457]	26.1209	up	-2.91758	-7.62471	73313335	chr12	73313276	-	FALSE	mm|12qC3	104001	NM_153457	reticulon 1	chr12:73313335-73313276	GO:0008150|GO:0003674|GO:0016020|GO:0005783|GO:0016021	NM_153457	Mm.221275
A_51_P455647	Car2	Mus musculus carbonic anhydrase 2 (Car2), mRNA [NM_009801]	23.4084	up	-3.09919	-7.64815	14900265	chr3	14900206	+	FALSE	mm|3qA1	12349	NM_009801	carbonic anhydrase 2	chr3:14900206-14900265	GO:0030424|GO:0045672|GO:0045177|GO:0032849|GO:0004089|GO:0015670|GO:0005615|GO:0046903|GO:0046872|GO:0016829|GO:0005829|GO:0005902|GO:0016323|GO:0005737|GO:0045780|GO:0008270|GO:0002009|GO:0006730	NM_009801	Mm.1186
A_55_P2178678	P2rx5	Mus musculus purinergic receptor P2X, ligand-gated ion channel, 5 (P2rx5), mRNA [NM_033321]	29.4201	up	-1.92064	-6.79937	72986187	chr11	72986128	+	FALSE	mm|11qB4	94045	NM_033321	purinergic receptor P2X, ligand-gated ion channel, 5	chr11:72986128-72986187	GO:0035590|GO:0004931|GO:0005886|GO:0005525|GO:0005524|GO:0019228|GO:0034220|GO:0016020|GO:0005887|GO:0043416|GO:0008144|GO:0006810|GO:0001614|GO:0051260|GO:0008270|GO:0004872|GO:0016021|GO:0005216|GO:0006812|GO:0007166|GO:0006811	NM_033321	Mm.156893
A_51_P123625	Irg1	Mus musculus immunoresponsive gene 1 (Irg1), mRNA [NM_008392]	14.3603	up	-3.4321	-7.27611	103455231	chr14	103455171	+	FALSE	mm|14qE2.3	16365	NM_008392	immunoresponsive gene 1	chr14:103455171-103455231	GO:0019543|GO:0047547|GO:0032496	NM_008392	Mm.4662
A_55_P2037662	Atp1a3	Mus musculus ATPase, Na+/K+ transporting, alpha 3 polypeptide (Atp1a3), mRNA [NM_144921]	31.5244	up	-2.65219	-7.63058	25763251	chr7	25763192	-	FALSE	mm|7qA3	232975	NM_144921	ATPase, Na+/K+ transporting, alpha 3 polypeptide	chr7:25763251-25763192	GO:0030424|GO:0008344|GO:0005886|GO:0005783|GO:0015077|GO:0005634|GO:0003824|GO:0046872|GO:0015662|GO:0006754|GO:0005737|GO:0034220|GO:0000166|GO:0043209|GO:0006810|GO:0016820|GO:0007613|GO:0006814|GO:0006813|GO:0006812|GO:0006811|GO:0005391|GO:0005794|GO:0042493|GO:0005890|GO:0005524|GO:0015672|GO:0035235|GO:0016787|GO:0016020|GO:0008542|GO:0008152|GO:0016021	NM_144921	Mm.44101
A_55_P1998942	Oas1a	Mus musculus 2'-5' oligoadenylate synthetase 1A (Oas1a), mRNA [NM_145211]	25.7104	up	-1.59146	-6.27574	121348397	chr5	121348338	-	FALSE	mm|5qF	246730	NM_145211	2'-5' oligoadenylate synthetase 1A	chr5:121348397-121348338	GO:0005515|GO:0003725|GO:0001730|GO:0008152|GO:0048525	NM_145211	Mm.14301
A_51_P102789	C1qc	Mus musculus complement component 1, q subcomponent, C chain (C1qc), mRNA [NM_007574]	17.3813	up	-3.62798	-7.74744	136445825	chr4	136445766	-	FALSE	mm|4qD3	12262	NM_007574	complement component 1, q subcomponent, C chain	chr4:136445825-136445766	GO:0005581|GO:0030853|GO:0005576|GO:0045650	NM_007574	Mm.439732
A_51_P192800	Grn	Mus musculus granulin (Grn), mRNA [NM_008175]	10.5975	up	2.07326	-1.33239	102297751	chr11	102297692	+	FALSE	mm|11qD	14824	NM_008175	granulin	chr11:102297692-102297751	GO:0050679|GO:0005739|GO:0007566|GO:0001835|GO:0005615	NM_008175	Mm.1568
A_55_P2094060	Gzma	Mus musculus granzyme A (Gzma), mRNA [NM_010370]	10.5809	up	1.10796	-2.29544	113884094	chr13	113884035	-	FALSE	mm|13qD2.2	14938	NM_010370	granzyme A	chr13:113884094-113884035	GO:0043065|GO:0051354|GO:0004252|GO:0006915|GO:0005576|GO:0003824|GO:0042803|GO:0043392|GO:0006922|GO:0042802|GO:0016787|GO:0032078|GO:0051603|GO:0008152|GO:0019835|GO:0006508|GO:0008236|GO:0008233	NM_010370	Mm.15510
A_52_P375312	Amica1	Mus musculus adhesion molecule, interacts with CXADR antigen 1 (Amica1), mRNA [NM_001005421]	158.633	up	0.198161	-7.11138	44915545	chr9	44915486	+	FALSE	mm|9qA5.2	270152	NM_001005421	adhesion molecule, interacts with CXADR antigen 1	chr9:44915486-44915545	GO:0008150|GO:0003674|GO:0005886	NM_001005421	Mm.190461
A_52_P24308	Uchl1	Mus musculus ubiquitin carboxy-terminal hydrolase L1 (Uchl1), mRNA [NM_011670]	36.6945	up	-2.47957	-7.67706	67074977	chr5	67073886	+	FALSE	mm|5qC3.1	22223	NM_011670	ubiquitin carboxy-terminal hydrolase L1	chr5:67073886-67074977	GO:0043130|GO:0006511|GO:0030424|GO:0016579|GO:0005886|GO:0008283|GO:0016874|GO:0005634|GO:0007409|GO:0031694|GO:0043231|GO:0005829|GO:0050905|GO:0005622|GO:0007412|GO:0005737|GO:0043407|GO:0043025|GO:0007628|GO:0008242|GO:0006950|GO:0019233|GO:0004197|GO:0016787|GO:0008152|GO:0019896|GO:0008233|GO:0042755|GO:0004221|GO:0008234	NM_011670	Mm.29807
A_55_P2008437	Cdkn2a	Mus musculus cyclin-dependent kinase inhibitor 2A (Cdkn2a), transcript variant 1, mRNA [NM_009877]	15.997	down	-2.94086	1.05887	88920464	chr4	88920405	-	FALSE	mm|4qC4	12578	NM_009877	cyclin-dependent kinase inhibitor 2A	chr4:88920464-88920405	GO:0005515|GO:0010468|GO:0033088|GO:0014070|GO:0030308|GO:0003700|GO:0001652|GO:0006364|GO:0009303|GO:0071158|GO:0070534|GO:0008637|GO:0051444|GO:0055105|GO:0000209|GO:0019901|GO:0007569|GO:0010389|GO:0007568|GO:0010243|GO:0030889|GO:0045786|GO:0043234|GO:0007049|GO:0008544|GO:0000075|GO:0005654|GO:0045893|GO:0090398|GO:0001953|GO:0008134|GO:0048103|GO:0008285|GO:0045736|GO:0005634|GO:0000079|GO:…	NM_009877	Mm.4733
A_51_P108459	Gpr65	Mus musculus G-protein coupled receptor 65 (Gpr65), mRNA [NM_008152]	33.7458	up	-0.88443	-5.96107	99514786	chr12	99514727	+	FALSE	mm|12qE	14744	NM_008152	G-protein coupled receptor 65	chr12:99514727-99514786	GO:0005886|GO:0031532|GO:0004930|GO:0010447|GO:0030819|GO:0006915|GO:0032862|GO:0007165|GO:0007186|GO:0016020|GO:0051496|GO:0004872|GO:0004871|GO:0016021	NM_008152	Mm.378924
A_55_P2033041	Sirpb1b	Mus musculus signal-regulatory protein beta 1B (Sirpb1b), mRNA [NM_001173460]	13.1455	up	-3.97255	-7.68905	15495857	chr3	15495798	-	FALSE	mm|3qA1	668101	NM_001173460	signal-regulatory protein beta 1B	chr3:15495857-15495798	GO:0008150|GO:0003674|GO:0005575	NM_001173460	Mm.423523
A_51_P389885	Spic	Mus musculus Spi-C transcription factor (Spi-1/PU.1 related) (Spic), mRNA [NM_011461]	19.3241	up	-3.39832	-7.67065	88138112	chr10	88138053	-	FALSE	mm|10qC1	20728	NM_011461	Spi-C transcription factor (Spi-1/PU.1 related)	chr10:88138112-88138053	GO:0043565|GO:0006355|GO:0003700|GO:0045944|GO:0001824|GO:0005634|GO:0003677|GO:0006351	NM_011461	Mm.21642
A_55_P1961127	H19	Mus musculus H19 fetal liver mRNA (H19), non-coding RNA [NR_001592]	20.7959	up	3.70576	-0.672461	149761551	chr7	149761492	-	FALSE	mm|7qF5	14955	NR_001592	H19 fetal liver mRNA	chr7:149761551-149761492	GO:0005737|GO:0008285|GO:0005844	NR_001592	Mm.14802
A_55_P1976278	Prkcb	Mus musculus protein kinase C, beta (Prkcb), mRNA [NM_008855]	17.0612	up	-1.61569	-5.70834	129777900	chr7	129777841	+	FALSE	mm|7qF3	18751	NM_008855	protein kinase C, beta	chr7:129777841-129777900	GO:0050853|GO:0005515|GO:0034339|GO:0005886|GO:0005634|GO:0050681|GO:0031526|GO:0046872|GO:0014059|GO:0005829|GO:0035556|GO:0042393|GO:0005737|GO:0030374|GO:0000166|GO:0016301|GO:0005080|GO:0006816|GO:0043123|GO:0016772|GO:0005813|GO:0006355|GO:0035408|GO:0005246|GO:0042493|GO:0006874|GO:0005624|GO:0006915|GO:0005625|GO:0005626|GO:0005524|GO:0006351|GO:0035403|GO:0042113|GO:0016310|GO:0004672|GO:…	NM_008855	Mm.207496
A_51_P254855	Ptgs2	Mus musculus prostaglandin-endoperoxide synthase 2 (Ptgs2), mRNA [NM_011198]	33.8284	up	-2.78124	-7.8614	151954803	chr1	151954744	+	FALSE	mm|1qG1	19225	NM_011198	prostaglandin-endoperoxide synthase 2	chr1:151954744-151954803	GO:0042640|GO:0071636|GO:0031622|GO:0004601|GO:0001516|GO:0042127|GO:0032496|GO:0090050|GO:0007613|GO:0051926|GO:0090362|GO:0006979|GO:0005792|GO:0008610|GO:0007566|GO:0051968|GO:0043234|GO:0050873|GO:0032227|GO:0016491|GO:0005788|GO:0019899|GO:0020037|GO:0055114|GO:0043005|GO:0008285|GO:0005783|GO:0005634|GO:0030282|GO:0046872|GO:0008289|GO:0045429|GO:0046697|GO:0005737|GO:0006954|GO:0031915|GO:…	NM_011198	Mm.292547
A_55_P2020538			12.2021	up	-3.58168	-7.19074					FALSE
A_51_P286737	Ccl2	Mus musculus chemokine (C-C motif) ligand 2 (Ccl2), mRNA [NM_011333]	75.4566	up	0.22982	-6.00776	81850709	chr11	81850650	+	FALSE	mm|11qC	20296	NM_011333	chemokine (C-C motif) ligand 2	chr11:81850650-81850709	GO:0005515|GO:0009408|GO:0035684|GO:0019221|GO:0090265|GO:0005615|GO:0005737|GO:0006955|GO:0006954|GO:0006935|GO:0071356|GO:0031727|GO:0043025|GO:0007179|GO:0008201|GO:0048010|GO:0008009|GO:0019725|GO:0070098|GO:0001664|GO:0030593|GO:0006874|GO:0043277|GO:0006916|GO:0005576|GO:0001525|GO:0005125|GO:0043615|GO:0010574|GO:0002548|GO:0071222|GO:0071346|GO:0001938|GO:0050870|GO:0050806|GO:0071347|GO:…	NM_011333	Mm.290320
A_55_P2035018	Clec4n	Mus musculus C-type lectin domain family 4, member n (Clec4n), transcript variant 1, mRNA [NM_020001]	295.106	up	2.07969	-6.1254	123197028	chr6	123196969	+	FALSE	mm|6qF2	56620	NM_020001	C-type lectin domain family 4, member n	chr6:123196969-123197028	GO:0005515|GO:0016020|GO:0005488|GO:0045087|GO:0050832|GO:0005529|GO:0050715|GO:0016021|GO:0043123	NM_020001	Mm.271782
A_55_P2067895	Krba1	Mus musculus KRAB-A domain containing 1 (Krba1), mRNA [NM_133922]	13.6978	up	-1.0251	-4.80098	48366890	chr6	48366831	+	FALSE	mm|6qB2.3	77827	NM_133922	KRAB-A domain containing 1	chr6:48366831-48366890	GO:0008150|GO:0003674|GO:0005575	NM_133922	Mm.107646
A_52_P343306	H2-Aa	Mus musculus histocompatibility 2, class II antigen A, alpha (H2-Aa), mRNA [NM_010378]	178.197	up	0.328749	-7.14858	34421344	chr17	34421285	-	FALSE	mm|17qB1	14960	NM_010378	histocompatibility 2, class II antigen A, alpha	chr17:34421344-34421285	GO:0005515|GO:0005886|GO:0048002|GO:0002504|GO:0042613|GO:0005764|GO:0019886|GO:0006955|GO:0016020|GO:0019882|GO:0042605|GO:0016021|GO:0034341|GO:0045582|GO:0009897	NM_010378	Mm.235338
A_55_P2216976	D13Ertd608e	Mus musculus 2 days pregnant adult female oviduct cDNA, RIKEN full-length enriched library, clone:E230022M20 product:hypothetical protein, full insert sequence. [AK143258]	10.0015	up	-4.39759	-7.71974					FALSE		52673	AK143258	DNA segment, Chr 13, ERATO Doi 608, expressed				Mm.466870
A_55_P2171658	Stx3	Mus musculus syntaxin 3 (Stx3), transcript variant A, mRNA [NM_152220]	17.3883	up	-3.60679	-7.72684	11852097	chr19	11852038	-	FALSE	mm|19qA	20908	NM_152220	syntaxin 3	chr19:11852097-11852038	GO:0005515|GO:0043005|GO:0050544|GO:0005886|GO:0042581|GO:0042582|GO:0031201|GO:0006887|GO:0006886|GO:0031175|GO:0030426|GO:0005484|GO:0016324|GO:0006944|GO:0016020|GO:0005911|GO:0006810|GO:0006836|GO:0001950|GO:0034599|GO:0016021|GO:0016192	NM_152220	Mm.272264
A_51_P400543	Aif1	Mus musculus allograft inflammatory factor 1 (Aif1), mRNA [NM_019467]	22.3439	up	-0.574072	-5.05588	35308018	chr17	35307959	-	FALSE	mm|17qB1	11629	NM_019467	allograft inflammatory factor 1	chr17:35308018-35307959	GO:0005515|GO:0043066|GO:0030335|GO:0014739|GO:0005886|GO:0005884|GO:0005509|GO:0001891|GO:0003779|GO:0042995|GO:0048661|GO:0001726|GO:0030027|GO:0045429|GO:0005829|GO:0005737|GO:0051015|GO:0016020|GO:0010629|GO:0001934|GO:0043204|GO:0005856|GO:0051017	NM_019467	Mm.10747
A_52_P162298	Ydjc	Mus musculus YdjC homolog (bacterial) (Ydjc), mRNA [NM_026940]	39.6635	up	2.38319	-2.92655	17148789	chr16	17148730	+	FALSE	mm|16qA3	69101	NM_026940	YdjC homolog (bacterial)	chr16:17148730-17148789	GO:0008150|GO:0003674|GO:0016810|GO:0005975|GO:0005575	NM_026940	Mm.101656
A_55_P1988994		predicted gene, 16798 [Source:MGI Symbol;Acc:MGI:4439722] [ENSMUST00000103314]	12.0521	down	-6.06617	-2.47495	67967476	chr6	67967417	+	FALSE	mm|6qC1		AY816714		chr6:67967417-67967476			Mm.424476
A_55_P1962937	Trem2	Mus musculus triggering receptor expressed on myeloid cells 2 (Trem2), mRNA [NM_031254]	40.2966	up	0.923563	-4.40902	48491596	chr17	48491537	+	FALSE	mm|17qC	83433	NM_031254	triggering receptor expressed on myeloid cells 2	chr17:48491537-48491596	GO:0007165|GO:0016020|GO:0005886|GO:0005576|GO:0004872|GO:0016021|GO:0004888	NM_031254	Mm.261623
A_55_P1998601	Slc17a9	Mus musculus solute carrier family 17, member 9 (Slc17a9), mRNA [NM_183161]	12.2689	up	0.149817	-3.46712	180476965	chr2	180476906	+	FALSE	mm|2qH4	228993	NM_183161	solute carrier family 17, member 9	chr2:180476906-180476965	GO:0005215|GO:0016020|GO:0006810|GO:0016021|GO:0006887|GO:0055085	NM_183161	Mm.87189
A_51_P487555	Cd7	Mus musculus CD7 antigen (Cd7), mRNA [NM_009854]	16.6878	up	1.08858	-2.97215	120898127	chr11	120898068	-	FALSE	mm|11qE2	12516	NM_009854	CD7 antigen	chr11:120898127-120898068	GO:0048873|GO:0016020|GO:0004872|GO:0016021	NM_009854	Mm.4100
A_55_P2066505	Mpo	Mus musculus myeloperoxidase precursor (Mpo) mRNA, complete cds. [AY500847]	11.6508	up	1.32995	-2.21241	87615180	chr11	87615121	+	FALSE	mm|11qC	17523	AY500847	myeloperoxidase	chr11:87615121-87615180	GO:0050830|GO:0050832|GO:0005625|GO:0001878|GO:0005615|GO:0002679|GO:0005739|GO:0004601|GO:0034374|GO:0019430|GO:0044130|GO:0030141|GO:0042744|GO:0006979|GO:0008201|GO:0055114|GO:0002149		Mm.4668
A_52_P327664	Gbp5	Mus musculus guanylate binding protein 5 (Gbp5), mRNA [NM_153564]	12.2097	up	-3.8817	-7.49166	142184838	chr3	142184779	+	FALSE	mm|3qH1	229898	NM_153564	guanylate binding protein 5	chr3:142184779-142184838	GO:0071346|GO:0031410	NM_153564	Mm.459245
A_51_P217463	Cxcl2	Mus musculus chemokine (C-X-C motif) ligand 2 (Cxcl2), mRNA [NM_009140]	12.2113	up	-4.15199	-7.76214	91334593	chr5	91334534	+	FALSE	mm|5qE1	20310	NM_009140	chemokine (C-X-C motif) ligand 2	chr5:91334534-91334593	GO:0008009|GO:0006955|GO:0006954|GO:0006935|GO:0030595|GO:0030593|GO:0002237|GO:0005576|GO:0005615|GO:0005125	NM_009140	Mm.4979
A_55_P2017600	Crmp1	Mus musculus collapsin response mediator protein 1 (Crmp1), transcript variant 2, mRNA [NM_007765]	25.4953	up	-0.362991	-5.03515	37683287	chr5	37683228	+	FALSE	mm|5qB3	12933	NM_007765	collapsin response mediator protein 1	chr5:37683228-37683287	GO:0051219|GO:0005737|GO:0016810|GO:0016787|GO:0016812|GO:0043025|GO:0005856|GO:0030425|GO:0006208	NM_007765	Mm.290995
A_55_P1999648	Plin2	Mus musculus perilipin 2 (Plin2), mRNA [NM_007408]	13.7706	up	2.49173	-1.29179	86302906	chr4	86302847	-	FALSE	mm|4qC4	11520	NM_007408	perilipin 2	chr4:86302906-86302847	GO:0005811|GO:0005515|GO:0005737|GO:0016020|GO:0005886|GO:0019915|GO:0005634|GO:0015909	NM_007408	Mm.381
A_55_P2042016			12.6649	up	-1.64838	-5.31114	143198450	chr5	143198391	+	FALSE	mm|5qG2				chr5:143198391-143198450
A_55_P2063736	Gp49a	Mus musculus glycoprotein 49 A (Gp49a), mRNA [NM_008147]	51.8501	up	0.731638	-4.96464	51201674	chr10	51201615	+	FALSE	mm|10qB3	14727	NM_008147	glycoprotein 49 A	chr10:51201615-51201674	GO:0016020|GO:0016021	NM_008147	Mm.439661
A_51_P305628	Atp8a2	Mus musculus ATPase, aminophospholipid transporter-like, class I, type 8A, member 2 (Atp8a2), mRNA [NM_015803]	11.4712	up	-3.9961	-7.51605	60266675	chr14	60266616	-	FALSE	mm|14qD1	50769	NM_015803	ATPase, aminophospholipid transporter-like, class I, type 8A, member 2	chr14:60266675-60266616	GO:0006754|GO:0000287|GO:0016787|GO:0016020|GO:0015914|GO:0000166|GO:0004012|GO:0016820|GO:0016021|GO:0005524|GO:0046872|GO:0015662	NM_015803	Mm.319599
A_52_P69558	Gm8221	Mus musculus predicted gene 8221 (Gm8221), non-coding RNA [NR_033577]	22.846	up	-2.6464	-7.16027	77457443	chr15	77457384	+	FALSE	mm|15qE1	666661	NR_033577	apolipoprotein L 7c pseudogene	chr15:77457384-77457443		NR_033577	Mm.390818
A_51_P200561	4930506M07Rik	Mus musculus RIKEN cDNA 4930506M07 gene (4930506M07Rik), transcript variant 2, mRNA [NM_175172]	41.2994	up	-2.42191	-7.78996	59048100	chr19	59048041	-	FALSE	mm|19qD3	71653	NM_175172	RIKEN cDNA 4930506M07 gene	chr19:59048100-59048041	GO:0003674|GO:0051899|GO:0007275|GO:0042995|GO:0007409|GO:0030426	NM_175172	Mm.37338
A_51_P460954	Ccl6	Mus musculus chemokine (C-C motif) ligand 6 (Ccl6), mRNA [NM_009139]	76.3	up	1.38907	-4.86454	83402056	chr11	83401997	-	FALSE	mm|11qC	20305	NM_009139	chemokine (C-C motif) ligand 6	chr11:83402056-83401997	GO:0008009|GO:0006955|GO:0006935|GO:0060326|GO:0005576|GO:0005615|GO:0005125	NM_009139	Mm.137
A_55_P2046092	Xlr4d-ps	PREDICTED: Mus musculus X-linked lymphocyte-regulated 4D, pseudogene (Xlr4d-ps), mRNA [XM_003086835]	27.701	down	-7.55134	-2.75947	71979652	chrX	71979593	+	FALSE	mm|XqA7.3	667387	XM_003086835	X-linked lymphocyte-regulated 4D, pseudogene	chrX:71979593-71979652		XM_003086835
A_55_P2085905	Anpep	Mus musculus alanyl (membrane) aminopeptidase (Anpep), mRNA [NM_008486]	34.6839	up	0.244944	-4.87125	86966775	chr7	86966716	-	FALSE	mm|7qD3	16790	NM_008486	alanyl (membrane) aminopeptidase	chr7:86966775-86966716	GO:0004177|GO:0008152	NM_008486	Mm.4487
A_51_P423578	Slfn2	Mus musculus schlafen 2 (Slfn2), mRNA [NM_011408]	56.0998	up	-0.178714	-5.98864	82883850	chr11	82883791	+	FALSE	mm|11qC	20556	NM_011408	schlafen 2	chr11:82883791-82883850	GO:0008285	NM_011408	Mm.278689
A_55_P2067362	Dpep2	dipeptidase 2 [Source:MGI Symbol;Acc:MGI:2442042] [ENSMUST00000034373]	20.0032	up	-1.19244	-5.51459	108508909	chr8	108508850	-	FALSE	mm|8qD3	319446	AK089244	dipeptidase 2	chr8:108508909-108508850	GO:0005575|GO:0031225|GO:0016805|GO:0046872|GO:0016020|GO:0016787|GO:0008152|GO:0006508|GO:0008235|GO:0008233|GO:0008239|GO:0008237|GO:0008238		Mm.248357
A_55_P2160286	Olfm1	Mus musculus olfactomedin 1 (Olfm1), transcript variant 2, mRNA [NM_001038612]	16.82	up	-2.73385	-6.80595	28068206	chr2	28068147	+	FALSE	mm|2qA3	56177	NM_001038612	olfactomedin 1	chr2:28068147-28068206	GO:0005515|GO:0005783|GO:0007275|GO:0051259|GO:0005615	NM_001038612	Mm.43278
A_52_P17146	Bmpr1a	Mus musculus bone morphogenetic protein receptor, type 1A (Bmpr1a), mRNA [NM_009758]	10.0259	up	-4.45358	-7.77924	35224398	chr14	35224339	-	FALSE	mm|14qB	12166	NM_009758	bone morphogenetic protein receptor, type 1A	chr14:35224398-35224339	GO:0005515|GO:0035137|GO:0007389|GO:0060896|GO:0051216|GO:0001756|GO:0046332|GO:0048598|GO:0030154|GO:0042803|GO:0007507|GO:0060914|GO:0048589|GO:0000166|GO:0016301|GO:0048352|GO:0043025|GO:0016772|GO:0050679|GO:0048339|GO:0001707|GO:0030501|GO:0003272|GO:0030509|GO:0060391|GO:0001701|GO:0016310|GO:0048382|GO:0042733|GO:0005886|GO:0030324|GO:0021983|GO:0009953|GO:0009952|GO:0009950|GO:0030425|GO:…	NM_009758	Mm.237825
A_51_P411345	Mogat2	Mus musculus monoacylglycerol O-acyltransferase 2 (Mogat2), mRNA [NM_177448]	10.0632	up	-3.76942	-7.10044	106367660	chr7	106367601	-	FALSE	mm|7qE2	233549	NM_177448	monoacylglycerol O-acyltransferase 2	chr7:106367660-106367601	GO:0006629|GO:0008610|GO:0016747|GO:0005783|GO:0003846|GO:0006071|GO:0050892|GO:0016020|GO:0019432|GO:0006651|GO:0016407|GO:0016021|GO:0046462|GO:0016740|GO:0008415	NM_177448	Mm.208030
A_55_P2124582	Xlr4a	Mus musculus X-linked lymphocyte-regulated 4A (Xlr4a), mRNA [NM_001081642]	10.9854	down	-4.28645	-0.82893	70326933	chrX	70326874	-	FALSE	mm|XqA7.3	434794	NM_001081642	X-linked lymphocyte-regulated 4A	chrX:70326933-70326874	GO:0008150|GO:0003674|GO:0005575	NM_001081642	Mm.104764
A_55_P2151609	Sorl1	Mus musculus sortilin-related receptor, LDLR class A repeats-containing (Sorl1), mRNA [NM_011436]	111.997	up	-0.969741	-7.77705	41776631	chr9	41776572	-	FALSE	mm|9qA5.1	20660	NM_011436	sortilin-related receptor, LDLR class A repeats-containing	chr9:41776631-41776572	GO:0005515|GO:0048471|GO:0016477|GO:0005771|GO:0043025|GO:0030169	NM_011436	Mm.121920
A_55_P2068892	Il6ra	Mus musculus interleukin 6 receptor, alpha (Il6ra), mRNA [NM_010559]	15.8463	up	2.37244	-1.61363	89674113	chr3	89674054	-	FALSE	mm|3qF1	16194	NM_010559	interleukin 6 receptor, alpha	chr3:89674113-89674054	GO:0032755|GO:0008284|GO:0070119|GO:0005886|GO:0019221|GO:0050731|GO:0019981|GO:0005615|GO:0042803|GO:0016324|GO:0004872|GO:0070102|GO:0034097|GO:0010536|GO:0004896|GO:0009986|GO:0004915|GO:0042517|GO:0005896|GO:0005576|GO:0032722|GO:0070120|GO:0045768|GO:0048661|GO:0046427|GO:0016020|GO:0032966|GO:0031018|GO:0016049|GO:0016021|GO:0019899|GO:0043410	NM_010559	Mm.2856
A_52_P423814	Cox8b	Mus musculus cytochrome c oxidase, subunit VIIIb (Cox8b), nuclear gene encoding mitochondrial protein, mRNA [NM_007751]	12.358	down	-3.40209	0.225282	148084911	chr7	148084852	-	FALSE	mm|7qF5	12869	NM_007751	cytochrome c oxidase, subunit VIIIb	chr7:148084911-148084852	GO:0005739|GO:0016020|GO:0004129|GO:0005743|GO:0016021|GO:0055114	NM_007751	Mm.3841
A_55_P2041700	Hoxa11as	Mus musculus HOXA11 antisense RNA (non-protein coding) (Hoxa11as), non-coding RNA [NR_015348]	13.9577	down	-1.97117	1.83182	52199768	chr6	52199709	+	FALSE	mm|6qB3	15397	NR_015348	HOXA11 antisense RNA (non-protein coding)	chr6:52199709-52199768		NR_015348	Mm.469918
A_55_P2046101	Xlr4b	Mus musculus X-linked lymphocyte-regulated 4B (Xlr4b), mRNA [NM_021365]	13.6789	down	-2.76658	1.0073	70467536	chrX	70467477	+	FALSE	mm|XqA7.3	27083	NM_021365	X-linked lymphocyte-regulated 4B	chrX:70467477-70467536	GO:0008150|GO:0003674|GO:0005575	NM_021365	Mm.104764
A_51_P167292	Chi3l3	Mus musculus chitinase 3-like 3 (Chi3l3), mRNA [NM_009892]	12.9388	up	-0.91318	-4.60681	105950544	chr3	105950485	-	FALSE	mm|3qF2.2	12655	NM_009892	chitinase 3-like 3	chr3:105950544-105950485	GO:0004563|GO:0006032|GO:0005975|GO:0043169|GO:0005529|GO:0005576|GO:0003824|GO:0004553|GO:0008061|GO:0006954|GO:0008152|GO:0016023|GO:0004568	NM_009892	Mm.387173
A_52_P602091	Csf1r	Mus musculus colony stimulating factor 1 receptor (Csf1r), mRNA [NM_001037859]	36.8316	up	-0.20711	-5.40998	61289758	chr18	61289398	+	FALSE	mm|18qE1	12978	NM_001037859	colony stimulating factor 1 receptor	chr18:61289398-61289758	GO:0005515|GO:0005886|GO:0008283|GO:0045672|GO:0005524|GO:0042803|GO:0043235|GO:0016310|GO:0019955|GO:0004672|GO:0000166|GO:0016020|GO:0016301|GO:0004872|GO:0006468|GO:0004713|GO:0016021|GO:0004714|GO:0007169|GO:0016740|GO:0016772	NM_001037859	Mm.22574
A_51_P212782	Il1b	Mus musculus interleukin 1 beta (Il1b), mRNA [NM_008361]	36.8714	up	-2.67612	-7.88055	129190406	chr2	129190347	-	FALSE	mm|2qF1	16176	NM_008361	interleukin 1 beta	chr2:129190406-129190347	GO:0032755|GO:0019221|GO:0046330|GO:0050900|GO:0005615|GO:0042221|GO:0032757|GO:0031622|GO:0030730|GO:0001660|GO:0032496|GO:0033198|GO:0051781|GO:0007613|GO:0043123|GO:0043122|GO:0032729|GO:0045410|GO:0032725|GO:0030593|GO:0019904|GO:0007568|GO:0045840|GO:0005125|GO:0045086|GO:0035176|GO:0008083|GO:0045833|GO:0045080|GO:0042346|GO:0051044|GO:0050996|GO:0050995|GO:0008285|GO:0014050|GO:0032874|GO:…	NM_008361	Mm.222830
A_55_P2005672			58.6637	up	0.0704598	-5.80394	178767378	chr1	178767319	+	FALSE	mm|1qH4				chr1:178767319-178767378
A_55_P1957459	Lilrb4	Mus musculus leukocyte immunoglobulin-like receptor, subfamily B, member 4 (Lilrb4), mRNA [NM_013532]	94.8312	up	3.93985	-2.62744	51216219	chr10	51216160	+	FALSE	mm|10qB3	14728	NM_013532	leukocyte immunoglobulin-like receptor, subfamily B, member 4	chr10:51216160-51216219	GO:0016020|GO:0005886|GO:0004872|GO:0016021	NM_013532	Mm.34408
A_55_P2018061	Cd209a	Mus musculus CD209a antigen (Cd209a), mRNA [NM_133238]	16.3435	up	-3.83685	-7.8675	3743540	chr8	3743481	-	FALSE	mm|8qA1.1	170786	NM_133238	CD209a antigen	chr8:3743540-3743481	GO:0008150|GO:0016020|GO:0005488|GO:0005529|GO:0004872|GO:0016021|GO:0005537|GO:0046872|GO:0006897	NM_133238	Mm.32510
A_55_P2019601	Csprs	Mus musculus component of Sp100-rs (Csprs), mRNA [NM_033616]	10.92	up	-1.29277	-4.74166	111631	chr8_random	111572	-	FALSE		114564	NM_033616	component of Sp100-rs	chr8_random:111631-111572		NM_033616	Mm.362644
A_55_P2024888	Ctss	Mus musculus cathepsin S (Ctss), mRNA [NM_021281]	21.2778	up	3.63788	-0.773398	95360304	chr3	95360245	+	FALSE	mm|3qF2.1	13040	NM_021281	cathepsin S	chr3:95360245-95360304	GO:0016787|GO:0016020|GO:0006508|GO:0008233|GO:0008234|GO:0005764|GO:0043231	NM_021281	Mm.3619
A_52_P113537	Xist	Mus musculus inactive X specific transcripts (Xist), transcript variant 1, non-coding RNA [NR_001463]	642.933	down	-7.64557	1.68296	100656348	chrX	100656289	-	FALSE	mm|XqD	213742	NR_001463	inactive X specific transcripts	chrX:100656348-100656289	GO:0005694|GO:0009048	NR_001463	Mm.274770
A_51_P296528	Lass4	Mus musculus LAG1 homolog, ceramide synthase 4 (Lass4), mRNA [NM_026058]	12.6485	up	-0.955763	-4.61665	4524047	chr8	4523988	+	FALSE	mm|8qA1.1	67260	NM_026058	LAG1 homolog, ceramide synthase 4	chr8:4523988-4524047	GO:0043565|GO:0008610|GO:0006355|GO:0003700|GO:0016020|GO:0005783|GO:0030148|GO:0005634|GO:0050291|GO:0016021|GO:0046513|GO:0003677	NM_026058	Mm.35511
A_51_P173114	Cdhr1	Mus musculus cadherin-related family member 1 (Cdhr1), mRNA [NM_130878]	14.258	up	-4.00174	-7.83544	37891446	chr14	37891387	-	FALSE	mm|14qB	170677	NM_130878	cadherin-related family member 1	chr14:37891446-37891387	GO:0005515|GO:0016020|GO:0005886|GO:0042622|GO:0009987|GO:0005887|GO:0005509|GO:0004872|GO:0016021|GO:0045494|GO:0007155|GO:0007156	NM_130878	Mm.156506
A_66_P106388	Ms4a4c	Mus musculus membrane-spanning 4-domains, subfamily A, member 4C (Ms4a4c), mRNA [NM_029499]	59.6989	up	-1.95192	-7.85155	11501032	chr19	11500973	+	FALSE	mm|19qA	64380	NM_029499	membrane-spanning 4-domains, subfamily A, member 4C	chr19:11500973-11501032	GO:0008150|GO:0003674|GO:0005575	NM_029499	Mm.440715
A_55_P2149575	Sdr39u1	Mus musculus short chain dehydrogenase/reductase family 39U, member 1 (Sdr39u1), mRNA [NM_001082975]	15.1789	up	-2.48248	-6.40647	56516504	chr14	56516445	-	FALSE	mm|14qC3	654795	NM_001082975	short chain dehydrogenase/reductase family 39U, member 1	chr14:56516504-56516445	GO:0050662|GO:0008150|GO:0003674|GO:0005488|GO:0005575|GO:0003824|GO:0044237	NM_001082975	Mm.387102
A_52_P586004	Hk3	Mus musculus hexokinase 3 (Hk3), nuclear gene encoding mitochondrial protein, transcript variant 1, mRNA [NM_001033245]	39.9963	up	-2.17707	-7.49887	55107959	chr13	55107900	-	FALSE	mm|13qB1	212032	NM_001033245	hexokinase 3	chr13:55107959-55107900	GO:0005975|GO:0042562|GO:0004396|GO:0003824|GO:0005524|GO:0006096|GO:0005739|GO:0043234|GO:0016310|GO:0000166|GO:0016301|GO:0008152|GO:0016773|GO:0046835|GO:0019899|GO:0016740	NM_001033245	Mm.267479
A_51_P121031	March1	Mus musculus membrane-associated ring finger (C3HC4) 1 (March1), transcript variant 3, mRNA [NM_175188]	38.2411	up	-1.06531	-6.32236	68994193	chr8	68994134	+	FALSE	mm|8qB3.2	72925	NM_175188	membrane-associated ring finger (C3HC4) 1	chr8:68994134-68994193	GO:0000209|GO:0042287|GO:0004842|GO:0005794|GO:0002495|GO:0016874|GO:0031410|GO:0005764|GO:0046872|GO:0006955|GO:0016020|GO:0008270|GO:0016021|GO:0005768	NM_175188	Mm.380457
A_66_P132295	Tfpi	Mus musculus tissue factor pathway inhibitor (Tfpi), transcript variant 1, mRNA [NM_011576]	11.7971	up	0.933352	-2.62701	84273118	chr2	84273059	-	FALSE	mm|2qD	21788	NM_011576	tissue factor pathway inhibitor	chr2:84273118-84273059	GO:0005886|GO:0007596|GO:0004867|GO:0010466|GO:0007598|GO:0005576|GO:0030414|GO:0005615	NM_011576	Mm.124316
A_55_P1976224	Ckb	Mus musculus creatine kinase, brain (Ckb), mRNA [NM_021273]	12.5844	up	0.517398	-3.13616	112907846	chr12	112907787	-	FALSE	mm|12qF1	12709	NM_021273	creatine kinase, brain	chr12:112907846-112907787	GO:0004111|GO:0003824|GO:0005524|GO:0005829|GO:0005739|GO:0016310|GO:0005737|GO:0000166|GO:0030644|GO:0006600|GO:0016301|GO:0016740|GO:0016772	NM_021273	Mm.16831
A_55_P2184023	Dnahc7a	Mus musculus adult male hypothalamus cDNA, RIKEN full-length enriched library, clone:A230008D12 product:unclassifiable, full insert sequence. [AK038423]	11.7727	up	-2.55421	-6.11158	53754950	chr1	53754891	-	FALSE	mm|1qC1.1	627872	AK038423	dynein, axonemal, heavy chain 7A	chr1:53754950-53754891	GO:0008150|GO:0005929|GO:0003674		Mm.184692
[truncated: 342 more rows]
